# Supplementary material for: Heparan sulfates are critical regulators of the inhibitory megakaryocyte-platelet receptor G6b-B
Source: eLife. 2019 Aug 22;8:e46840. doi: 10.7554/eLife.46840 (PMC6742478; doi:10.7554/eLife.46840)
Supplement: Figure 2—source data 1. [file elife-46840-fig2-data1.xlsx]

## Sheet: Figure 2 A
				mouse G6b-B dimer				Fc control				human G6b-B dimer
		BSA		0.043	0.043	0.113	0.012	0.009	0.035	0.007	0.009	0.044	0.035
		perlecan		0.864	0.941			0.014	0.007	0.054		0.555	0.895
		syndecan		0.026	0.026	0.08		0.008	0.005	0.046		0.031	0.025
		agrin		0.043	0.034			0.007	0.006			0.038	0.038
		collagen I		0.072	0.074			0.028	0.017			0.046	0.055
		collagen IV		0.108	0.004			0.007	0.003			0.1	0.003
		fibronectin		0.077	0.108			0.038	0.055			0.081	0.099
		fibrinogen		0.111	0.145			0.072	0.096			0.104	0.138
		m laminin 111		0.069	0.083	0.104		0.008	0.007	0.008		0.066	0.098
		rec. hu laminin 111		0.096	0.083	0.132	0.031	0.022	0.016	0.022	0.011	0.099	0.087
		rec. hu laminin 411		0.079	0.147	0.246	0.056	0.018	0.019	0.091	0.017	0.058	0.127
		rec. hu laminin 421		0.129	0.233			0.026	0.029			0.086	0.207
		rec. hu laminin 511		0.267	0.077	0.15	0.031	0.034	0.016	0.03		0.105	0.074
		rec. hu laminin 521		0.043	0.072	0.139	0.037	0.011	0.024	0.042	0.023	0.044	0.08
		streptavidin		0.046	0.041		0.02	0.007	0.009		0.009	0.045	0.026
		streptavidin + heparin-bio		0.954	0.939		0.864	0.008	0.009		0.009	0.581	0.927

## Sheet: Figure 2 B
		Control				Heparinase III-treated
replicate		1	2	3	4	1	2	3	4
	Perlecan	0.934	0.744	0.597	0.881	0.254	0.203	0.132	0.166
	BSA	0.127	0.037	0.051	0.054	0.088	0.037	0.051	0.046

## Sheet: Figure 2 C
	Heparin									Heparan Sulfate
	concentration (µM)	Replicate	1	2	3					concentration (µM)	Replicate	1	2	3
	0		0.775	0.888	0.9015					0		0.775	0.888	0.9015
	0.002		0.153	0.256	0.22625					0.00125		0.39	0.534	0.49835
	0.00666667		0.086	0.156	0.13685					0.00416667		0.195	0.295	0.2559
	0.02		0.095	0.115	0.0947					0.0125		0.101	0.184	0.1519
	0.0666667		0.041	0.061	0.05045					0.0416667		0.064	0.108	0.08685
	0.2		0.03	0.037	0.03365					0.125		0.042	0.071	0.0552
	0.666667		0.024	0.027	0.02585					0.416667		0.028	0.049	0.03655
