# Supplementary material for: Heparan sulfates are critical regulators of the inhibitory megakaryocyte-platelet receptor G6b-B
Source: eLife. 2019 Aug 22;8:e46840. doi: 10.7554/eLife.46840 (PMC6742478; doi:10.7554/eLife.46840)
Supplement: Figure 12—source data 1. [file elife-46840-fig12-data1.xlsx]

## Sheet: Figure 12A
unstimulated - TLT1-Alexa647 binding
		WT buffer						Mpig6b KO buffer
time (min)	mouse	1	2	3	4	5	6	1	2	3	4	5	6
0		1018.79	1340.97	1009.16	1134.06	1058.99	1285.98	1490.88	1376.86		1365.09	1347.78	1374.69
5
10
20		940.91	1135.13	933.92	1043.15	961.79	894.67	1196.52	1127.23	1168.3	1274.93	1206.19	1280.07
		WT heparin						Mpig6b KO heparin
time (min)	mouse	1	2	3	4	5	6	1	2	3	4	5	6
0		1018.79	1340.97	1009.16	1134.06	1058.99	1285.98	1490.88	1376.86		1365.09	1347.78	1374.69
5
10
20		951.56	1093.9	913.2	1201.16	967.53	877.25	1140.65	1148.04	1183.71	1258.78	1265.68	1304.36
		WT APAC						Mpig6b KO APAC
time (min)	mouse	1	2	3	4	5	6	1	2	3	4	5	6
0		1018.79	1340.97	1009.16	1134.06	1058.99	1285.98	1490.88	1376.86		1365.09	1347.78	1374.69
5		874.45	1112.66	894.87	1115.76	1062.99	899.1	2109.21	1662.23	1610.81	2606.36	2136.35	2403.49
10		867.1	1096.9	887.72	992.63	1045.96	982.89	2863.75	2121.02	1792.34	3234.75	2512.68	2837.16
20		883.52	1100.06	867.07	928.9	945.03	874.91	3574.89	2557.1	2387.28	4017.07	2902.75	3584.73
unstimulated - fibrinogen 488 binding
		WT buffer						Mpig6b KO buffer
time (min)	mouse	1	2	3	4	5	6	1	2	3	4	5	6
0		1001.13	1030.27	716.7	863.06	667.85	1128.35	855.33	1001.05	845.44	788.9	808.97	828.31
5
10
20		1080.99	916.57	825.38	943.56	733.03	714.72	1127.73	1004.4	1066.1	918.59	862.73	855.35
		WT heparin						Mpig6b KO heparin
time (min)	mouse	1	2	3	4	5	6	1	2	3	4	5	6
0		1001.13	1030.27	716.7	863.06	667.85	1128.35	855.33	1001.05	845.44	788.9	808.97	828.31
5
10
20		852.63	792.22	806.87	1622.04	745.05	714.65	972.05	1072	1008.41	872.08	869.66	931.58
		WT APAC						Mpig6b KO APAC
time (min)	mouse	1	2	3	4	5	6	1	2	3	4	5	6
0		1001.13	1030.27	716.7	863.06	667.85	1128.35	855.33	1001.05	845.44	788.9	808.97	828.31
5		761.41	895.48	793.97	1081.74	731.27	576.16	6561.7	5171.05	5494.4	4904.46	4938.99	5281.27
10		755.61	863.72	807.27	871.31	802.14	808.78	8295.97	7480.62	8067.03	7310.56	6947.13	7127.28
20		895.16	938.11	825.55	811.51	791.99	743.94	14502.8	9215.6	8460.93	10581.3	8408.84	10530.1

## Sheet: Figure 12B
	stimulated - TLT1-Alexa647 binding
			WT buffer + CLEC-2 Ab						Mpig6b KO buffer + CLEC-2 Ab
	time (min)	mouse	1	2	3	4	5	6	1	2	3	4	5	6
	0		1018.79	1340.97	1009.16	1134.06	1058.99	1285.98	1490.88	1376.86		1365.09	1347.78	1374.69
	5		3078.63	2232.87	2963.42	2845.4	3120.76	2645.11	2586.93	2322.73	2264.56	3059.19	2918.54	2583.41
	10		3508.44	2822.39	3312.16	3755.4	4026.51	3566.75	3423.18	2857.97	2800.62	3888.8	3650.79	3348.91
	20		5446.04	4217.08	5383.4	4345.14	5442.35	4882.02	4512.45	3585.16	3771.29	4795.48	4651.62	4186.28
			WT heparin + CLEC-2 Ab						Mpig6b KO heparin + CLEC-2 Ab
	time (min)	mouse	1	2	3	4	5	6	1	2	3	4	5	6
	0		1018.79	1340.97	1009.16	1134.06	1058.99	1285.98	1490.88	1376.86		1365.09	1347.78	1374.69
	5		2787.76	1864.64	2577.58	2553.09	2862.76	2610.28	2717.71	2216.27	2301.93	3128.82	2819.84	2641.62
	10		3144.73	2280.95	2939.85	3806.22	3947.41	3171.42	3337.76	2818.74	2703.83	3886.17	3605.15	3289.69
	20		5219	3496.49	5061.84	5167.22	5097.56	4044.68	4530.15	3687.23	3799.76	4659.61	4400.92	4141.36
			WT APAC + CLEC-2 Ab						Mpig6b KO APAC + CLEC-2 Ab
	time (min)	mouse	1	2	3	4	5	6	1	2	3	4	5	6
	0		1018.79	1340.97	1009.16	1134.06	1058.99	1285.98	1490.88	1376.86		1365.09	1347.78	1374.69
	5		1388.15	1163.59	1140.12	1366.91	1593.62	1649.94	2655.37	2455.78	1897.33	3054.59	2878.71	2900.21
	10		1433.17	1190.47	1125		1689.49	2014.18	3331.73	2943.23	2559.46	3861.56	3518.03	3594.2
	20		1999.68	1347.79	1617.88		2100.18	2792.33	4514.83	3935.57	3876.23	4722	4717.17	4679.44
	stimulated - fibrinogen 488 binding
			WT buffer + CLEC-2 Ab						Mpig6b KO buffer + CLEC-2 Ab
	time (min)	mouse	1	2	3	4	5	6	1	2	3	4	5	6
	0		1001.13	1030.27	716.7	863.06	667.85	1128.35	855.33	1001.05	845.44	788.9	808.97	828.31
	5		14510.2	8898.91	15024.1	13491.6	15297.6	12310.7	17957.2	18277.6	20426.1	16027.7	19324.2	14500.8
	10		16592.6	13547	17812.8	22873.3	24545	21361.1	23268.7	23801.6	22235.8	26202.7	27661	24178.4
	20		33678.9	28004.4	34580.5	31941.8	35983.2	35209.6	33745	32104	30662	35750.9	38526	32416.5
			WT heparin + CLEC-2 Ab						Mpig6b KO heparin + CLEC-2 Ab
	time (min)	mouse	1	2	3	4	5	6	1	2	3	4	5	6
	0		1001.13	1030.27	716.7	863.06	667.85	1128.35	855.33	1001.05	845.44	788.9	808.97	828.31
	5		14087.4	7647.99	14314.4	12259.8	13712.4	12764.2	20298.7	17770.2	20843.6	16354.6	18956.7	15174.2
	10		18146.6	10271.7	16995	22025.3	24340.1	19238.5	23956.2	22844.2	23579.7	26161.9	27170.3	22908.4
	20		32730.5	26167	32867.1	36901.7	33467	32076.7	35571.1	32761.4	31205.7	38184	36113.6	33877.6
			WT APAC + CLEC-2 Ab						Mpig6b KO APAC + CLEC-2 Ab
	time (min)	mouse	1	2	3	4	5	6	1	2	3	4	5	6
	0		1001.13	1030.27	716.7	863.06	667.85	1128.35	855.33	1001.05	845.44	788.9	808.97	828.31
	5		5189.85	2048.7	3656.67	3244.45	4226.9	5453.88	9734.21	10042.9	7091.32	5156.18	7093.94	7645.88
	10		5496.82	2438.75	3953.21		5682.62	7057.67	9564.58	12034.9	8941.11	8616.59	9132.49	10037.1
	20		11038.2	4222.29	8853.11		8005.85	10493.5	17522.2	16615	15047.4	11217.3	13095.3	13143.2

## Sheet: Figure 12C
		WT								Mpig6b KI								Mpig6b KO
		1	2	3	4	5	6	7	8	1	2	3	4	5	6	7	8	1	2	3	4	5	6
	buffer	986.07	1019.98	1043.15	961.79	894.67	1013.01	1105.14	974.91	1350.25	1247.8	1724.71	1696.83	1330.08	1521.94	1371.91	1435.59	1222.12	1257.56	1274.93	1206.19	1280.07	1385.04
	Hep	927.05	982.68	1201.16	967.53	877.25	994.17	1036.9	976.68	1297.79	1229.82	1822.79	1743.4	1337.99	1448.91	1316.74	1400.65	1230.54	1223.83	1258.78	1265.68	1304.36	1331.54
	APAC	912.65	1088.37	928.9	945.03	874.91	1008.67	1084.82	954.56	2854.8	2416.44	1853.11	1813.56	1978.14	2741.39	3281.36	3129.52	3957.45	3604.45	4017.07	2902.75	3584.73	4747.39
	CLEC-2 + buffer	5761.88	5530.58	4345.14	5442.35	4882.02	5938.89	6426.71	6532.16	5119.67	4623.94	4124.16	3711.71	4697.71	5806.49	5488.37	5697.54	4172.9	4220.52	4795.48	4651.62	4186.28	4378.46
	CLEC-2 + hep	5160.83	5471.37	5167.22	5097.56	4044.68	5224.57	5879.5	6214.03	5087.67	4541.78	4124.81	3805.2	4802.35	5526.5	5260.9	5498.96	4043.21	4150.22	4659.61	4400.92	4141.36	4200.08
	CLEC-2 + APAC	2838.28	3235.76		2100.18	2792.33	2588.03	3084.04	3689.07	5366.88	4953.56	4686.16	4285.14	5026.85	6011.83	5644.37	5948.56	4967.72	4507.37	4722	4717.17	4679.44	5283.89
