# Supplementary material for: Heparan sulfates are critical regulators of the inhibitory megakaryocyte-platelet receptor G6b-B
Source: eLife. 2019 Aug 22;8:e46840. doi: 10.7554/eLife.46840 (PMC6742478; doi:10.7554/eLife.46840)
Supplement: Table 1—source data 1. [file elife-46840-table1-data1.xls]

## Sheet: Sheet1
Accession	Description	Score	Coverage	# Proteins	# Unique Peptides	# Peptides	# PSMs	# AAs	MW [kDa]	calc. pI
E9PZ16	Basement membrane-specific heparan sulfate proteoglycan core protein OS=Mus musculus GN=Hspg2 PE=4 SV=1 - [E9PZ16_MOUSE]	607.221	45.81	6	22	131	196	4383	469.487	6.46826
	A2	Sequence	# PSMs	# Proteins	# Protein Groups	Protein Group Accessions	Modifications	ΔCn	q-Value	PEP	XCorr	Charge	MH+ [Da]	ΔM [ppm]	RT [min]	# Missed Cleavages
	High	RLDLTYSFLGSQGVGQcYDSSPcER	2	5	2	Q05793;E9PZ16	C17(Carbamidomethyl); C23(Carbamidomethyl)	0	0	0.0001474	6.99462	3	2895.31	3.04453	20.1405	1
	High	ALEVEEcRcPPGYVGLScQDcAPGYTR	1	4	2	Q05793;E9PZ16	C7(Carbamidomethyl); C9(Carbamidomethyl); C18(Carbamidomethyl); C21(Carbamidomethyl)	0	0	0.0002313	6.31204	3	3144.36	-0.803908	16.6299	1
	High	AELLVAEAPSKPITVTVEEQR	2	3	1	E9PZ16		0	0	0.0009264	5.52123	3	2280.24	-0.271284	17.8608	0
	High	VPAGSAAVFPcmASGYPTPAITWSK	2	5	2	Q05793;E9PZ16	C11(Carbamidomethyl); M12(Oxidation)	0	0	0.001043	5.33356	3	2582.24	-0.710576	20.0837	0
	High	IASVKPSDAGTYVcQAQnALGTAQK	1	3	2	Q05793;E9PZ16	C14(Carbamidomethyl); N18(Deamidated)	0	0	0.004169	5.27492	3	2579.28	1.12478	14.9482	0
	High	LYILQASPADAGEYVcR	3	3	1	E9PZ16	C16(Carbamidomethyl)	0	0	0.0004629	5.06493	3	1925.94	-1.51297	18.9632	0
	High	cPPGYVGLScQDcAPGYTR	2	4	2	Q05793;E9PZ16	C1(Carbamidomethyl); C10(Carbamidomethyl); C13(Carbamidomethyl)	0	0	0.001595	4.99725	3	2157.91	-0.932943	15.1679	0
	High	LHHmSVADSGEYVcR	1	4	2	Q05793;E9PZ16	M4(Oxidation); C14(Carbamidomethyl)	0	0	0.0009589	4.96585	3	1776.78	-0.933295	13.0421	0
	High	VVSGSGTQEASILVTIQqTLSPSHSQSVVHPVR	2	3	1	E9PZ16	Q18(Deamidated)	0	0	0.006327	4.93425	4	3429.81	3.74192	24.1242	0
	High	SPVISIEPPSSTVQQGQDASFK	2	3	2	Q05793;E9PZ16		0	0	0.0006642	4.92094	2	2302.16	-0.183299	17.4188	0
	High	TGSGLYLGQcELcEcnGHSDLcHPETGAcSR	2	4	2	Q05793;E9PZ16	C10(Carbamidomethyl); C13(Carbamidomethyl); C15(Carbamidomethyl); N16(Deamidated); C22(Carbamidomethyl); C29(Carbamidomethyl)	0	0	0.002176	4.92014	4	3526.42	-0.69728	16.5626	0
	High	FSDTcFLDTDGQATcDAcAPGYTGR	1	4	2	Q05793;E9PZ16	C5(Carbamidomethyl); C15(Carbamidomethyl); C18(Carbamidomethyl)	0	0	0.0002709	4.85435	3	2786.11	-1.31305	17.6369	0
	High	NSQLTGGFTVEPVHDGAR	2	4	2	Q05793;E9PZ16		0	0	0.001162	4.84338	2	1884.92	-1.02654	15.4321	0
	High	IQVVVLSASGANSVPVR	1	2	1	E9PZ16		0	0	0.0005164	4.73107	2	1695.98	0.135713	17.6681	0
	High	cTAcEPGYTGQYcEQcAPGYEGDPNVQGGR	1	4	2	Q05793;E9PZ16	C1(Carbamidomethyl); C4(Carbamidomethyl); C13(Carbamidomethyl); C16(Carbamidomethyl)	0	0	0.01162	4.70281	3	3381.32	-3.0852	14.1968	0
	High	LYQLSPADSGEYVcQVAGSSHPEHEASFK	2	3	2	Q05793;E9PZ16	C14(Carbamidomethyl)	0	0	0.0007225	4.68574	4	3193.45	-1.36281	18.2173	0
	High	NIGASVEFHcAVPNER	2	4	2	Q05793;E9PZ16	C10(Carbamidomethyl)	0	0	0.001036	4.68101	2	1799.85	-1.4312	15.1165	0
	High	AGnGQEATITVTVTR	2	3	1	E9PZ16	N3(Deamidated)	0	0	0.00123	4.67969	2	1518.77	-0.945261	14.0478	0
	High	RcEScAPGYEGNPIQPGGK	1	4	2	Q05793;E9PZ16	C2(Carbamidomethyl); C5(Carbamidomethyl)	0	0	0.003186	4.67223	3	2076.92	-0.811622	12.6441	1
	High	HQGSELHFPSVQPSDAGVYIcTcR	2	4	2	Q05793;E9PZ16	C21(Carbamidomethyl); C23(Carbamidomethyl)	0	0	0.002327	4.64807	3	2745.25	-1.22306	20.2082	0
	High	IASVKPSDAGTYVcQAQNALGTAQK	1	3	2	Q05793;E9PZ16	C14(Carbamidomethyl)	0	0	0.001736	4.6428	3	2578.29	-0.434394	17.3968	0
	High	HPTPLALGQFHTVTLLR	1	5	2	Q05793;E9PZ16		0	0	0.006762	4.56075	3	1901.07	-2.59771	22.2815	0
	High	FQGLDLNEELYLGGYPDYGAIPK	1	4	2	Q05793;E9PZ16		0	0	0.006096	4.55651	2	2572.26	-1.29049	23.2002	0
	High	ITFRPDSADGmLLYnGQK	4	5	2	Q05793;E9PZ16	M11(Oxidation); N15(Deamidated)	0	0	0.0009263	4.51663	3	2042.98	-1.58274	17.2838	0
	High	TGSGLYLGQcELcEcNGHSDLcHPETGAcSR	2	4	2	Q05793;E9PZ16	C10(Carbamidomethyl); C13(Carbamidomethyl); C15(Carbamidomethyl); C22(Carbamidomethyl); C29(Carbamidomethyl)	0	0	0.02457	4.48206	3	3525.42	-3.92912	16.6579	0
	High	GmVFGIPDGVLELVPQR	3	4	2	Q05793;E9PZ16	M2(Oxidation)	0	0	0.004361	4.47708	2	1842.98	-1.07453	23.9727	0
	High	VEGGAVPLESSVLVTIEPAGTAPGVIPPVR	1	2	1	E9PZ16		0	0	0.02446	4.45829	3	2911.61	-1.20294	23.005	0
	High	LPAIEPSDQGQYLcR	1	4	2	Q05793;E9PZ16	C14(Carbamidomethyl)	0	0	0.004632	4.40975	2	1746.85	-0.807217	16.0738	0
	High	IQVVVLSASGAnSVPVR	1	2	1	E9PZ16	N12(Deamidated)	0	0	0.0002863	4.40587	2	1696.96	2.07362	17.8578	0
	High	LRLPQVSPADSGDYVcR	2	3	1	E9PZ16	C16(Carbamidomethyl)	0	0	0.001928	4.40348	3	1932.96	0.244648	16.8463	1
	High	DIIYIGGAPDVATLTR	1	6	2	Q05793;E9PZ16		0	0	0.0004616	4.35277	2	1674.9	-0.811118	20.5292	0
	High	cEHSQALHcHPEAcGPDATcVNRPDGR	1	4	1	E9PZ16	C1(Carbamidomethyl); C9(Carbamidomethyl); C14(Carbamidomethyl); C20(Carbamidomethyl)	0	0	0.000712	4.34414	5	3131.3	-1.58858	14.7771	0
	High	mGKDITLEcISSGEPR	2	3	2	Q05793;E9PZ16	M1(Oxidation); C9(Carbamidomethyl)	0	0	0.004022	4.30437	2	1808.85	-2.60763	15.0343	1
	High	NLVLHTARPGAPPPQPLDLQHR	2	5	2	Q05793;E9PZ16		0	0	0.01321	4.30086	3	2427.34	0.45503	17.9218	0
	High	VVSGSGTQEASILVTIQQTLSPSHSQSVVHPVR	1	3	1	E9PZ16		0	0	0.0003881	4.25265	4	3428.81	-1.55949	24.181	0
	High	AASISAVSLEVAQPGPSSGPR	2	3	1	E9PZ16		0	0	0.0001237	4.25055	3	1981.03	-0.798027	16.7313	0
	High	EVSEAVVEKLEPEYR	2	4	2	Q05793;E9PZ16		0	0	0.00182	4.24286	2	1776.9	-0.186085	16.9232	1
	High	GPScQDcDTGYTR	1	4	2	Q05793;E9PZ16	C4(Carbamidomethyl); C7(Carbamidomethyl)	0	0	0.007636	4.19062	2	1516.58	-1.22064	10.7039	0
	High	IESSSSHVAEGQTLDLNcVVPGQAQVTWR	1	3	1	E9PZ16	C18(Carbamidomethyl)	0	0	0.08584	4.18718	3	3168.54	0.562637	19.5565	0
	High	VGGHLRPGIVQSGSIIR	1	3	1	E9PZ16		0	0	0.0189	4.17534	3	1746.01	-0.244955	16.8209	0
	High	EADQGAYTcEAMNSR	1	4	2	Q05793;E9PZ16	C9(Carbamidomethyl)	0	0	0.002623	4.16848	2	1702.68	-0.156466	11.8488	0
	High	VGSAEAFAQVLVQGSSSnLPDTSIPGGSTPTVQVTPQLETR	3	4	2	Q05793;E9PZ16	N18(Deamidated)	0	0	0.06568	4.16146	4	4127.1	4.66028	22.5445	0
	High	cSATGNPTPmLEWIGGPSGQLPAK	1	4	2	Q05793;E9PZ16	C1(Carbamidomethyl); M10(Oxidation)	0	0	0.0121	4.1223	3	2485.18	-0.264731	19.1584	0
	High	VSGISmDVAVPENTGQDSAR	2	3	1	E9PZ16	M6(Oxidation)	0	0	0.02481	4.09047	3	2048.96	0.0205901	13.8056	0
	High	IAHVELADAGQYR	2	4	2	Q05793;E9PZ16		0	0	0.007919	4.08254	3	1442.74	-0.528238	14.379	0
	High	LHQVSPVDSGEYVcR	2	2	1	E9PZ16	C14(Carbamidomethyl)	0	0	0.00903	4.06691	3	1745.82	-1.74543	13.5647	0
	High	LcNEcSDGSFHLSK	2	4	2	Q05793;E9PZ16	C2(Carbamidomethyl); C5(Carbamidomethyl)	0	0	0.005698	4.00457	2	1653.7	-0.810011	12.9991	0
	High	VSGISMDVAVPENTGQDSAR	1	3	1	E9PZ16		0	0	0.002868	3.99528	2	2032.96	-0.372316	16.2681	0
	High	TSTADGLLLWQGVVR	1	6	2	Q05793;E9PZ16		0	0	0.001502	3.94572	2	1615.88	-0.915614	22.0279	0
	High	GTPQDcQPcPcYGAPAAGqAAHTcFLDTDGHPTcDScSPGHSGR	1	4	2	Q05793;E9PZ16	C6(Carbamidomethyl); C9(Carbamidomethyl); C11(Carbamidomethyl); Q19(Deamidated); C24(Carbamidomethyl); C34(Carbamidomethyl); C37(Carbamidomethyl)	0	0	0.07004	3.94132	5	4759.89	1.08454	16.1899	0
	High	QLISTHFAPGDFQGFALVNPQR	1	4	2	Q05793;E9PZ16		0	0	0.005201	3.92994	3	2443.25	-0.27771	22.1964	0
	High	ITFRPDSADGmLLYNGQK	2	5	2	Q05793;E9PZ16	M11(Oxidation)	0	0	0.001209	3.91367	3	2042	-0.503938	16.6052	0
	High	cPIGYSGLScEScDAHFTR	1	4	2	Q05793;E9PZ16	C1(Carbamidomethyl); C10(Carbamidomethyl); C13(Carbamidomethyl)	0	0	0.001653	3.88548	3	2216.91	-0.7143	15.4289	0
	High	LDVEFKPLEPnGILLFSGGK	2	5	2	Q05793;E9PZ16	N11(Deamidated)	0	0	0.01272	3.8829	3	2174.18	2.55707	23.7993	0
	High	EADQGAYTcEAmNSR	1	4	2	Q05793;E9PZ16	C9(Carbamidomethyl); M12(Oxidation)	0	0	0.004066	3.86662	2	1718.67	-2.23917	10.8062	0
	High	SQSVRPGADVTFIcTAK	2	4	2	Q05793;E9PZ16	C14(Carbamidomethyl)	0	0	0.01451	3.86516	2	1836.93	-0.626177	15.5901	0
	High	GmLEPVQKPDVILVGAGYR	2	4	2	Q05793;E9PZ16	M2(Oxidation)	0	0	0.001641	3.77086	3	2058.1	-0.482515	18.075	0
	High	cEScAPGYEGNPIQPGGK	1	4	2	Q05793;E9PZ16	C1(Carbamidomethyl); C4(Carbamidomethyl)	0	0	0.004611	3.7573	2	1920.82	-1.25983	12.8332	0
	High	ATATAcRPcPcPYIDASR	2	4	2	Q05793;E9PZ16	C6(Carbamidomethyl); C9(Carbamidomethyl); C11(Carbamidomethyl)	0	0	0.0208	3.74619	3	2066.92	-0.913926	13.2235	0
	High	LLQVTPTDSGEYVcR	1	3	1	E9PZ16	C14(Carbamidomethyl)	0	0	0.001202	3.74504	2	1737.85	0.227154	15.5716	0
	High	VAEGQTLDLScVVPGQAHAQVTWHK	1	3	2	Q05793;E9PZ16	C11(Carbamidomethyl)	0	0	0.02672	3.72993	4	2731.36	0.546565	18.8519	0
	High	mASVGLSDIVmDTTVTHTTIHGR	3	4	2	Q05793;E9PZ16	M1(Oxidation); M11(Oxidation)	0	0	0.0009217	3.70255	3	2474.21	2.19951	18.7599	0
	High	KIPGDQIVSVVFIK	2	4	2	Q05793;E9PZ16		0	0	0.04302	3.66376	3	1542.92	-1.71533	21.0556	1
	High	LVSEDPINDGEWHR	2	5	1	E9PZ16		0	0	0.005667	3.65868	2	1666.78	-1.18456	15.1011	0
	High	AEmLQALASLEAVLLQTVYNTK	2	4	2	Q05793;E9PZ16	M3(Oxidation)	0	0	0.02674	3.65828	3	2422.3	3.42426	29.6814	0
	High	SIEYSPQLEDASAK	1	4	2	Q05793;E9PZ16		0	0	0.001984	3.65514	2	1537.74	-0.884004	14.0807	0
	High	IPGDQIVSVVFIK	1	4	2	Q05793;E9PZ16		0	0	0.04065	3.6532	2	1414.83	-0.783132	21.5866	0
	High	mFGLmNSHAmLK	1	3	2	Q05793;E9PZ16	M1(Oxidation); M5(Oxidation); M10(Oxidation)	0	0	0.03653	3.5465	2	1427.65	-1.93678	13.7844	0
	High	AmDFnGILTIR	1	4	2	Q05793;E9PZ16	M2(Oxidation); N5(Deamidated)	0	0	0.02311	3.54546	2	1267.63	-0.957349	18.6531	0
	High	VKAFAYLQVPER	1	5	2	Q05793;E9PZ16		0	0	0.01588	3.53193	3	1420.79	-0.965425	17.9406	1
	High	FSDTcFLDTDGQATcDAcAPGYTGRR	1	4	2	Q05793;E9PZ16	C5(Carbamidomethyl); C15(Carbamidomethyl); C18(Carbamidomethyl)	0	0	0.006931	3.50896	3	2942.22	1.47935	16.9592	1
	High	VPSGLYLGTcER	1	4	2	Q05793;E9PZ16	C10(Carbamidomethyl)	0	0	0.002958	3.49512	2	1351.67	-1.07429	15.3747	0
	High	FDAGSGmATIR	1	5	2	Q05793;E9PZ16	M7(Oxidation)	0	0	0.003988	3.42857	2	1141.53	-0.765241	11.7257	0
	High	DGQVPEVLGcGcDPHGSISSQcDAAGQcQcK	1	4	2	Q05793;E9PZ16	C10(Carbamidomethyl); C12(Carbamidomethyl); C22(Carbamidomethyl); C28(Carbamidomethyl); C30(Carbamidomethyl)	0	0	0.004279	3.36129	3	3377.37	-0.583184	14.6191	0
	High	IEGNTLVIPR	1	3	2	Q05793;E9PZ16		0	0	0.006497	3.3427	2	1111.65	0.200689	15.3435	0
	High	SPGPNVAVNTK	1	6	2	Q05793;E9PZ16		0	0	0.05824	3.33123	2	1083.58	1.39062	11.0647	0
	High	LDVEFKPLEPNGILLFSGGK	1	5	2	Q05793;E9PZ16		0	0	0.01539	3.27839	3	2173.19	0.960677	23.5977	0
	High	GSIQVDGEDLVTGR	1	6	2	Q05793;E9PZ16		0	0	0.01093	3.24214	2	1445.72	-0.809196	15.4416	0
	High	SPAYTLVWTR	1	4	2	Q05793;E9PZ16		0	0	0.02105	3.22166	2	1193.63	-0.389003	18.3777	0
	High	AmDFNGILTIR	1	4	2	Q05793;E9PZ16	M2(Oxidation)	0	0	0.02987	3.20927	2	1266.65	-0.277792	18.8954	0
	High	FDAGSGMATIR	1	5	2	Q05793;E9PZ16		0	0	0.009328	3.19538	2	1125.54	-0.630386	14.2091	0
	High	LENNmLmLPSVRPEDAGTYVcTATNR	2	5	2	Q05793;E9PZ16	M5(Oxidation); M7(Oxidation); C21(Carbamidomethyl)	0	0	0.01744	3.18136	3	2984.39	-0.690938	18.1047	0
	High	AGLSSGFVGcVR	1	5	2	Q05793;E9PZ16	C10(Carbamidomethyl)	0	0	0.07141	3.1736	2	1209.6	-0.198126	15.4238	0
	High	DITLEcISSGEPR	1	3	2	Q05793;E9PZ16	C6(Carbamidomethyl)	0	0	0.03319	3.16927	2	1476.7	-0.301219	16.624	0
	High	TcESLGAGGYR	1	4	2	Q05793;E9PZ16	C2(Carbamidomethyl)	0	0	0.01102	3.03801	2	1170.52	-0.56052	11.5115	0
	High	YELGSGLAVLR	1	5	2	Q05793;E9PZ16		0	0	0.005226	3.01177	2	1177.66	-0.381443	18.8679	0
	High	cRPTTQEIVR	1	4	2	Q05793;E9PZ16	C1(Carbamidomethyl)	0	0	0.02535	2.95535	3	1259.65	0.141544	11.5205	0
	High	AFAYLQVPER	1	5	2	Q05793;E9PZ16		0	0	0.01909	2.93046	2	1193.63	-0.601917	17.3588	0
	High	FLVHDAFWALPK	1	4	2	Q05793;E9PZ16		0	0	0.0436	2.9282	2	1443.78	0.315071	21.6812	0
	High	AMLQVHGGSGPR	1	4	2	Q05793;E9PZ16		0	0	0.003132	2.90592	2	1209.61	-2.6247	11.7796	0
	High	ESLEVQIHPSR	2	4	2	Q05793;E9PZ16		0	0	0.01815	2.87761	2	1294.67	-0.428853	13.4382	0
	High	AAGVPSASITWR	1	4	2	Q05793;E9PZ16		0	0	0.0116	2.86189	2	1215.65	-0.69667	15.9396	0
	High	VDGDLPPDSR	1	5	2	Q05793;E9PZ16		0	0	0.02415	2.81931	2	1070.51	-1.65549	10.9556	0
	High	ALSSAGQHVAR	1	4	2	Q05793;E9PZ16		0	0	0.01566	2.75501	2	1096.58	-1.52953	10.7111	0
	High	LSFDQPNDFK	1	4	2	Q05793;E9PZ16		0	0	0.07531	2.72094	2	1210.58	1.1843	15.8163	0
	High	LGTVPQFPR	1	4	2	Q05793;E9PZ16		0	0	0.05409	2.69074	2	1014.57	-0.816183	15.4791	0
	High	EVSEAVVEKLEPEYRK	1	4	2	Q05793;E9PZ16		0	0	0.02943	2.68724	3	1904.99	-1.04533	16.871	2
	High	QPDFISFGLVGGRPEFR	1	4	2	Q05793;E9PZ16		0	0	0.02347	2.62968	3	1921.99	0.6493	21.9999	0
	High	SKSPAYTLVWTR	2	4	2	Q05793;E9PZ16		0	0	0.04391	2.61959	2	1408.76	-0.102921	18.0075	1
	High	EASIVVSVLHSPHSGPSYTPATSITPPIR	1	3	1	E9PZ16		0	0	0.03955	2.58662	4	3000.57	-1.4716	20.7896	0
	High	cFcmGVSR	1	4	2	Q05793;E9PZ16	C1(Carbamidomethyl); C3(Carbamidomethyl); M4(Oxidation)	0	0	0.03418	2.57036	2	1032.41	-0.799428	11.1133	0
	High	EHLLmALADLDELLVR	1	4	2	Q05793;E9PZ16	M5(Oxidation)	0	0	0.01201	2.55098	3	1867	-1.52658	27.7555	0
	High	GDKVTSYGGELR	2	4	2	Q05793;E9PZ16		0	0	0.04748	2.5052	2	1281.64	-0.5177	12.3545	1
	High	LTVPSSQnSSFR	2	3	2	Q05793;E9PZ16	N8(Deamidated)	0	0	0.0268	2.49215	2	1323.65	-2.11283	13.5671	0
	High	GPSHVPSVSPPmR	2	3	1	E9PZ16	M12(Oxidation)	0	0	0.06642	2.4785	2	1363.68	-0.632302	11.9051	0
	High	NHGANLAYPPGSTSPIR	1	3	1	E9PZ16		0	0	0.02507	2.46058	3	1751.88	-0.628197	14.331	0
	High	QVQLSEEHWVHESGRPVQR	2	4	2	Q05793;E9PZ16		0	0	0.06913	2.40458	3	2301.15	-0.681224	16.984	0
	High	EDGRPLPSSAQQR	1	4	2	Q05793;E9PZ16		0	0	0.04686	2.39693	3	1440.72	-1.22336	10.7063	0
	High	GKFSSGITGcIK	1	5	2	Q05793;E9PZ16	C10(Carbamidomethyl)	0	0	0.04774	2.36977	2	1254.65	-1.92569	13.9478	1
	High	DPSPGQPSNFIVPFQEQAWQRPDGQPATR	1	4	2	Q05793;E9PZ16		0	0	0.02267	2.31534	3	3250.56	-0.556472	20.393	0
	High	VDSYGGFLR	1	4	2	Q05793;E9PZ16		0	0	0.06467	2.21845	2	1013.5	-0.660254	16.0768	0
	High	QFLGNKVDSYGGFLR	1	4	2	Q05793;E9PZ16		0	0	0.07083	2.18717	2	1700.87	-0.942065	18.9134	1
	High	NLIHTSNSR	1	4	2	Q05793;E9PZ16		0	0	0.07188	2.12932	2	1041.54	-1.04003	10.9583	0
	High	SLPEVPETIEFEVR	1	5	2	Q05793;E9PZ16		0	0	0.022	2.10737	2	1644.85	-1.59698	20.3961	0
	High	QPLVVLQGNNIVLEHHASR	1	4	2	Q05793;E9PZ16		0	0	0.03402	1.99747	4	2124.17	0.13744	18.8244	0
	High	nSQLTGGFTVEPVHDGAR	1	4	2	Q05793;E9PZ16	N1(Deamidated)	0	0	0.07091	1.99446	3	1885.9	-0.616231	16.0019	0
	High	cQVSGSPPHYFYWSR	1	4	2	Q05793;E9PZ16	C1(Carbamidomethyl)	0	0	0.059	1.93521	3	1870.83	-0.763393	17.6959	0
	High	cKPGFFGDATK	1	4	2	Q05793;E9PZ16	C1(Carbamidomethyl)	0	0	0.07046	1.71062	3	1227.58	-1.06776	13.6808	0
	High	EGGSLPPQAR	2	3	1	E9PZ16		0	0	0.04334	1.63351	2	1011.52	-1.5126	10.778	0
	High	cAPGYYGNPSQGQPcHR	1	4	2	Q05793;E9PZ16	C1(Carbamidomethyl); C15(Carbamidomethyl)	0	0	0.06589	1.32482	3	1948.82	0.597051	11.361	0
	High	EVEQcTcPPGYR	1	4	2	Q05793;E9PZ16	C5(Carbamidomethyl); C7(Carbamidomethyl)	0	0.001	0.1128	3.57109	2	1495.63	-0.122141	11.2307	0
	High	EGGQLPPGHSVQDGVLR	1	4	2	Q05793;E9PZ16		0	0.001	0.1399	3.03177	2	1745.89	-0.220848	13.3964	0
	High	LRSPVISIEPPSSTVQQGQDASFK	1	3	2	Q05793;E9PZ16		0	0.001	0.103	2.98928	3	2571.34	-0.125497	17.8551	1
	High	cLcLPGFSGPR	1	5	2	Q05793;E9PZ16	C1(Carbamidomethyl); C3(Carbamidomethyl)	0	0.001	0.1271	2.84471	2	1263.6	-1.547	18.5119	0
	High	GHTPTHPGTLNQR	1	4	2	Q05793;E9PZ16		0	0.001	0.1772	2.62176	3	1415.71	-0.07207	11.1852	0
	High	LRAPLPWQHR	1	3	2	Q05793;E9PZ16		0	0.001	0.09166	2.59487	3	1273.73	-1.31463	17.0937	1
	High	VIPYFTQTPYSFLPLPTIK	2	5	2	Q05793;E9PZ16		0	0.001	0.1518	2.45946	3	2225.22	-1.11521	25.8222	0
	High	RLGTVPQFPR	1	4	2	Q05793;E9PZ16		0	0.001	0.1194	2.36472	3	1170.67	-0.15837	15.6784	1
	High	APLPWQHR	1	3	2	Q05793;E9PZ16		0	0.001	0.1341	2.23992	2	1004.54	0.330442	14.1588	0
	High	AQIHNGILR	1	4	2	Q05793;E9PZ16		0	0.001	0.09742	2.20432	2	1021.59	-0.343569	12.4871	0
	High	FTVTQRPRPSSAPLHR	1	3	1	E9PZ16		0	0.001	0.1057	2.16592	4	1850.01	-0.410115	14.7831	0
	High	SYEIIFR	1	4	2	Q05793;E9PZ16		0	0.001	0.1388	2.06745	2	927.494	0.114903	17.3727	0
	High	FSSGITGcIK	1	5	2	Q05793;E9PZ16	C8(Carbamidomethyl)	0	0.001	0.1562	2.03859	2	1069.53	-1.58828	13.7695	0
	High	AQIHnGILR	1	4	2	Q05793;E9PZ16	N5(Deamidated)	0	0.001	0.08903	2.01903	2	1022.57	-0.947168	12.6623	0
	High	LNWGHIPAHPR	1	4	2	Q05793;E9PZ16		0	0.001	0.1075	1.97044	3	1297.69	-0.269077	16.5934	0
	High	LTVPSSQNSSFR	1	3	2	Q05793;E9PZ16		0	0.001	0.1041	1.86559	2	1322.67	-1.46292	13.3297	0
	High	ATFSSVPR	1	4	2	Q05793;E9PZ16		0	0.001	0.1071	1.8246	2	864.456	-1.25498	11.9251	0
	High	mFGLmnSHAmLK	1	3	2	Q05793;E9PZ16	M1(Oxidation); M5(Oxidation); N6(Deamidated); M10(Oxidation)	0	0.001	0.1507	1.78388	3	1428.63	-1.30906	14.1129	0
	High	SIEYSPQLEDASAKEFR	1	4	2	Q05793;E9PZ16		0	0.001	0.1154	1.74235	3	1969.95	-0.563704	16.404	1
	High	SHEPLTLGR	1	3	1	E9PZ16		0	0.001	0.1462	1.7101	2	1009.54	-0.33521	12.6171	0
	High	SVVPQGGPHSLR	1	4	2	Q05793;E9PZ16		0	0.005	0.2198	2.04802	2	1233.67	-0.439484	11.9769	0
	High	RSYEIIFR	1	4	2	Q05793;E9PZ16		0	0.006	0.236	2.30645	2	1083.59	0.281407	17.0657	1
	High	GGSLPPHAQVHGSR	1	3	1	E9PZ16		0	0.006	0.2265	1.24762	3	1399.72	-0.991152	11.0618	0
	High	VPGGPYLGTcSGcNcnGHASScDPVYGHcLncQHNTEGPQcDK	2	4	2	Q05793;E9PZ16	C10(Carbamidomethyl); C13(Carbamidomethyl); C15(Carbamidomethyl); N16(Deamidated); C22(Carbamidomethyl); C29(Carbamidomethyl); N31(Deamidated); C32(Carbamidomethyl); C41(Carbamidomethyl)	0	0.007	0.2505	4.44303	5	4823.9	3.82221	15.6573	0
	High	VTSYGGELR	1	4	2	Q05793;E9PZ16		0	0.008	0.275	2.25911	2	981.5	-0.0353911	11.766	0
Q05793	Basement membrane-specific heparan sulfate proteoglycan core protein OS=Mus musculus GN=Hspg2 PE=1 SV=1 - [PGBM_MOUSE]	489.948	43.51	1	1	110	160	3707	398.039	6.31592
	A2	Sequence	# PSMs	# Proteins	# Protein Groups	Protein Group Accessions	Modifications	ΔCn	q-Value	PEP	XCorr	Charge	MH+ [Da]	ΔM [ppm]	RT [min]	# Missed Cleavages
	High	RLDLTYSFLGSQGVGQcYDSSPcER	2	5	2	Q05793;E9PZ16	C17(Carbamidomethyl); C23(Carbamidomethyl)	0	0	0.0001474	6.99462	3	2895.31	3.04453	20.1405	1
	High	ALEVEEcRcPPGYVGLScQDcAPGYTR	1	4	2	Q05793;E9PZ16	C7(Carbamidomethyl); C9(Carbamidomethyl); C18(Carbamidomethyl); C21(Carbamidomethyl)	0	0	0.0002313	6.31204	3	3144.36	-0.803908	16.6299	1
	High	VPAGSAAVFPcmASGYPTPAITWSK	2	5	2	Q05793;E9PZ16	C11(Carbamidomethyl); M12(Oxidation)	0	0	0.001043	5.33356	3	2582.24	-0.710576	20.0837	0
	High	IASVKPSDAGTYVcQAQnALGTAQK	1	3	2	Q05793;E9PZ16	C14(Carbamidomethyl); N18(Deamidated)	0	0	0.004169	5.27492	3	2579.28	1.12478	14.9482	0
	High	cPPGYVGLScQDcAPGYTR	2	4	2	Q05793;E9PZ16	C1(Carbamidomethyl); C10(Carbamidomethyl); C13(Carbamidomethyl)	0	0	0.001595	4.99725	3	2157.91	-0.932943	15.1679	0
	High	LHHmSVADSGEYVcR	1	4	2	Q05793;E9PZ16	M4(Oxidation); C14(Carbamidomethyl)	0	0	0.0009589	4.96585	3	1776.78	-0.933295	13.0421	0
	High	SPVISIEPPSSTVQQGQDASFK	2	3	2	Q05793;E9PZ16		0	0	0.0006642	4.92094	2	2302.16	-0.183299	17.4188	0
	High	TGSGLYLGQcELcEcnGHSDLcHPETGAcSR	2	4	2	Q05793;E9PZ16	C10(Carbamidomethyl); C13(Carbamidomethyl); C15(Carbamidomethyl); N16(Deamidated); C22(Carbamidomethyl); C29(Carbamidomethyl)	0	0	0.002176	4.92014	4	3526.42	-0.69728	16.5626	0
	High	FSDTcFLDTDGQATcDAcAPGYTGR	1	4	2	Q05793;E9PZ16	C5(Carbamidomethyl); C15(Carbamidomethyl); C18(Carbamidomethyl)	0	0	0.0002709	4.85435	3	2786.11	-1.31305	17.6369	0
	High	NSQLTGGFTVEPVHDGAR	2	4	2	Q05793;E9PZ16		0	0	0.001162	4.84338	2	1884.92	-1.02654	15.4321	0
	High	cTAcEPGYTGQYcEQcAPGYEGDPNVQGGR	1	4	2	Q05793;E9PZ16	C1(Carbamidomethyl); C4(Carbamidomethyl); C13(Carbamidomethyl); C16(Carbamidomethyl)	0	0	0.01162	4.70281	3	3381.32	-3.0852	14.1968	0
	High	LYQLSPADSGEYVcQVAGSSHPEHEASFK	2	3	2	Q05793;E9PZ16	C14(Carbamidomethyl)	0	0	0.0007225	4.68574	4	3193.45	-1.36281	18.2173	0
	High	NIGASVEFHcAVPNER	2	4	2	Q05793;E9PZ16	C10(Carbamidomethyl)	0	0	0.001036	4.68101	2	1799.85	-1.4312	15.1165	0
	High	RcEScAPGYEGNPIQPGGK	1	4	2	Q05793;E9PZ16	C2(Carbamidomethyl); C5(Carbamidomethyl)	0	0	0.003186	4.67223	3	2076.92	-0.811622	12.6441	1
	High	HQGSELHFPSVQPSDAGVYIcTcR	2	4	2	Q05793;E9PZ16	C21(Carbamidomethyl); C23(Carbamidomethyl)	0	0	0.002327	4.64807	3	2745.25	-1.22306	20.2082	0
	High	IASVKPSDAGTYVcQAQNALGTAQK	1	3	2	Q05793;E9PZ16	C14(Carbamidomethyl)	0	0	0.001736	4.6428	3	2578.29	-0.434394	17.3968	0
	High	HPTPLALGQFHTVTLLR	1	5	2	Q05793;E9PZ16		0	0	0.006762	4.56075	3	1901.07	-2.59771	22.2815	0
	High	FQGLDLNEELYLGGYPDYGAIPK	1	4	2	Q05793;E9PZ16		0	0	0.006096	4.55651	2	2572.26	-1.29049	23.2002	0
	High	ITFRPDSADGmLLYnGQK	4	5	2	Q05793;E9PZ16	M11(Oxidation); N15(Deamidated)	0	0	0.0009263	4.51663	3	2042.98	-1.58274	17.2838	0
	High	TGSGLYLGQcELcEcNGHSDLcHPETGAcSR	2	4	2	Q05793;E9PZ16	C10(Carbamidomethyl); C13(Carbamidomethyl); C15(Carbamidomethyl); C22(Carbamidomethyl); C29(Carbamidomethyl)	0	0	0.02457	4.48206	3	3525.42	-3.92912	16.6579	0
	High	GmVFGIPDGVLELVPQR	3	4	2	Q05793;E9PZ16	M2(Oxidation)	0	0	0.004361	4.47708	2	1842.98	-1.07453	23.9727	0
	High	LPAIEPSDQGQYLcR	1	4	2	Q05793;E9PZ16	C14(Carbamidomethyl)	0	0	0.004632	4.40975	2	1746.85	-0.807217	16.0738	0
	High	DIIYIGGAPDVATLTR	1	6	2	Q05793;E9PZ16		0	0	0.0004616	4.35277	2	1674.9	-0.811118	20.5292	0
	High	mGKDITLEcISSGEPR	2	3	2	Q05793;E9PZ16	M1(Oxidation); C9(Carbamidomethyl)	0	0	0.004022	4.30437	2	1808.85	-2.60763	15.0343	1
	High	NLVLHTARPGAPPPQPLDLQHR	2	5	2	Q05793;E9PZ16		0	0	0.01321	4.30086	3	2427.34	0.45503	17.9218	0
	High	EVSEAVVEKLEPEYR	2	4	2	Q05793;E9PZ16		0	0	0.00182	4.24286	2	1776.9	-0.186085	16.9232	1
	High	AELLVAEAPSKPImVTVEEQR	1	1	1	Q05793	M14(Oxidation)	0	0	0.001176	4.23322	3	2326.23	0.651083	17.7372	0
	High	GPScQDcDTGYTR	1	4	2	Q05793;E9PZ16	C4(Carbamidomethyl); C7(Carbamidomethyl)	0	0	0.007636	4.19062	2	1516.58	-1.22064	10.7039	0
	High	EADQGAYTcEAMNSR	1	4	2	Q05793;E9PZ16	C9(Carbamidomethyl)	0	0	0.002623	4.16848	2	1702.68	-0.156466	11.8488	0
	High	VGSAEAFAQVLVQGSSSnLPDTSIPGGSTPTVQVTPQLETR	3	4	2	Q05793;E9PZ16	N18(Deamidated)	0	0	0.06568	4.16146	4	4127.1	4.66028	22.5445	0
	High	cSATGNPTPmLEWIGGPSGQLPAK	1	4	2	Q05793;E9PZ16	C1(Carbamidomethyl); M10(Oxidation)	0	0	0.0121	4.1223	3	2485.18	-0.264731	19.1584	0
	High	IAHVELADAGQYR	2	4	2	Q05793;E9PZ16		0	0	0.007919	4.08254	3	1442.74	-0.528238	14.379	0
	High	LcNEcSDGSFHLSK	2	4	2	Q05793;E9PZ16	C2(Carbamidomethyl); C5(Carbamidomethyl)	0	0	0.005698	4.00457	2	1653.7	-0.810011	12.9991	0
	High	TSTADGLLLWQGVVR	1	6	2	Q05793;E9PZ16		0	0	0.001502	3.94572	2	1615.88	-0.915614	22.0279	0
	High	GTPQDcQPcPcYGAPAAGqAAHTcFLDTDGHPTcDScSPGHSGR	1	4	2	Q05793;E9PZ16	C6(Carbamidomethyl); C9(Carbamidomethyl); C11(Carbamidomethyl); Q19(Deamidated); C24(Carbamidomethyl); C34(Carbamidomethyl); C37(Carbamidomethyl)	0	0	0.07004	3.94132	5	4759.89	1.08454	16.1899	0
	High	QLISTHFAPGDFQGFALVNPQR	1	4	2	Q05793;E9PZ16		0	0	0.005201	3.92994	3	2443.25	-0.27771	22.1964	0
	High	ITFRPDSADGmLLYNGQK	2	5	2	Q05793;E9PZ16	M11(Oxidation)	0	0	0.001209	3.91367	3	2042	-0.503938	16.6052	0
	High	cPIGYSGLScEScDAHFTR	1	4	2	Q05793;E9PZ16	C1(Carbamidomethyl); C10(Carbamidomethyl); C13(Carbamidomethyl)	0	0	0.001653	3.88548	3	2216.91	-0.7143	15.4289	0
	High	LDVEFKPLEPnGILLFSGGK	2	5	2	Q05793;E9PZ16	N11(Deamidated)	0	0	0.01272	3.8829	3	2174.18	2.55707	23.7993	0
	High	EADQGAYTcEAmNSR	1	4	2	Q05793;E9PZ16	C9(Carbamidomethyl); M12(Oxidation)	0	0	0.004066	3.86662	2	1718.67	-2.23917	10.8062	0
	High	SQSVRPGADVTFIcTAK	2	4	2	Q05793;E9PZ16	C14(Carbamidomethyl)	0	0	0.01451	3.86516	2	1836.93	-0.626177	15.5901	0
	High	GmLEPVQKPDVILVGAGYR	2	4	2	Q05793;E9PZ16	M2(Oxidation)	0	0	0.001641	3.77086	3	2058.1	-0.482515	18.075	0
	High	cEScAPGYEGNPIQPGGK	1	4	2	Q05793;E9PZ16	C1(Carbamidomethyl); C4(Carbamidomethyl)	0	0	0.004611	3.7573	2	1920.82	-1.25983	12.8332	0
	High	ATATAcRPcPcPYIDASR	2	4	2	Q05793;E9PZ16	C6(Carbamidomethyl); C9(Carbamidomethyl); C11(Carbamidomethyl)	0	0	0.0208	3.74619	3	2066.92	-0.913926	13.2235	0
	High	VAEGQTLDLScVVPGQAHAQVTWHK	1	3	2	Q05793;E9PZ16	C11(Carbamidomethyl)	0	0	0.02672	3.72993	4	2731.36	0.546565	18.8519	0
	High	mASVGLSDIVmDTTVTHTTIHGR	3	4	2	Q05793;E9PZ16	M1(Oxidation); M11(Oxidation)	0	0	0.0009217	3.70255	3	2474.21	2.19951	18.7599	0
	High	KIPGDQIVSVVFIK	2	4	2	Q05793;E9PZ16		0	0	0.04302	3.66376	3	1542.92	-1.71533	21.0556	1
	High	AEmLQALASLEAVLLQTVYNTK	2	4	2	Q05793;E9PZ16	M3(Oxidation)	0	0	0.02674	3.65828	3	2422.3	3.42426	29.6814	0
	High	SIEYSPQLEDASAK	1	4	2	Q05793;E9PZ16		0	0	0.001984	3.65514	2	1537.74	-0.884004	14.0807	0
	High	IPGDQIVSVVFIK	1	4	2	Q05793;E9PZ16		0	0	0.04065	3.6532	2	1414.83	-0.783132	21.5866	0
	High	mFGLmNSHAmLK	1	3	2	Q05793;E9PZ16	M1(Oxidation); M5(Oxidation); M10(Oxidation)	0	0	0.03653	3.5465	2	1427.65	-1.93678	13.7844	0
	High	AmDFnGILTIR	1	4	2	Q05793;E9PZ16	M2(Oxidation); N5(Deamidated)	0	0	0.02311	3.54546	2	1267.63	-0.957349	18.6531	0
	High	VKAFAYLQVPER	1	5	2	Q05793;E9PZ16		0	0	0.01588	3.53193	3	1420.79	-0.965425	17.9406	1
	High	FSDTcFLDTDGQATcDAcAPGYTGRR	1	4	2	Q05793;E9PZ16	C5(Carbamidomethyl); C15(Carbamidomethyl); C18(Carbamidomethyl)	0	0	0.006931	3.50896	3	2942.22	1.47935	16.9592	1
	High	VPSGLYLGTcER	1	4	2	Q05793;E9PZ16	C10(Carbamidomethyl)	0	0	0.002958	3.49512	2	1351.67	-1.07429	15.3747	0
	High	FDAGSGmATIR	1	5	2	Q05793;E9PZ16	M7(Oxidation)	0	0	0.003988	3.42857	2	1141.53	-0.765241	11.7257	0
	High	DGQVPEVLGcGcDPHGSISSQcDAAGQcQcK	1	4	2	Q05793;E9PZ16	C10(Carbamidomethyl); C12(Carbamidomethyl); C22(Carbamidomethyl); C28(Carbamidomethyl); C30(Carbamidomethyl)	0	0	0.004279	3.36129	3	3377.37	-0.583184	14.6191	0
	High	IEGNTLVIPR	1	3	2	Q05793;E9PZ16		0	0	0.006497	3.3427	2	1111.65	0.200689	15.3435	0
	High	SPGPNVAVNTK	1	6	2	Q05793;E9PZ16		0	0	0.05824	3.33123	2	1083.58	1.39062	11.0647	0
	High	LDVEFKPLEPNGILLFSGGK	1	5	2	Q05793;E9PZ16		0	0	0.01539	3.27839	3	2173.19	0.960677	23.5977	0
	High	GSIQVDGEDLVTGR	1	6	2	Q05793;E9PZ16		0	0	0.01093	3.24214	2	1445.72	-0.809196	15.4416	0
	High	SPAYTLVWTR	1	4	2	Q05793;E9PZ16		0	0	0.02105	3.22166	2	1193.63	-0.389003	18.3777	0
	High	AmDFNGILTIR	1	4	2	Q05793;E9PZ16	M2(Oxidation)	0	0	0.02987	3.20927	2	1266.65	-0.277792	18.8954	0
	High	FDAGSGMATIR	1	5	2	Q05793;E9PZ16		0	0	0.009328	3.19538	2	1125.54	-0.630386	14.2091	0
	High	LENNmLmLPSVRPEDAGTYVcTATNR	2	5	2	Q05793;E9PZ16	M5(Oxidation); M7(Oxidation); C21(Carbamidomethyl)	0	0	0.01744	3.18136	3	2984.39	-0.690938	18.1047	0
	High	AGLSSGFVGcVR	1	5	2	Q05793;E9PZ16	C10(Carbamidomethyl)	0	0	0.07141	3.1736	2	1209.6	-0.198126	15.4238	0
	High	DITLEcISSGEPR	1	3	2	Q05793;E9PZ16	C6(Carbamidomethyl)	0	0	0.03319	3.16927	2	1476.7	-0.301219	16.624	0
	High	TcESLGAGGYR	1	4	2	Q05793;E9PZ16	C2(Carbamidomethyl)	0	0	0.01102	3.03801	2	1170.52	-0.56052	11.5115	0
	High	YELGSGLAVLR	1	5	2	Q05793;E9PZ16		0	0	0.005226	3.01177	2	1177.66	-0.381443	18.8679	0
	High	cRPTTQEIVR	1	4	2	Q05793;E9PZ16	C1(Carbamidomethyl)	0	0	0.02535	2.95535	3	1259.65	0.141544	11.5205	0
	High	AFAYLQVPER	1	5	2	Q05793;E9PZ16		0	0	0.01909	2.93046	2	1193.63	-0.601917	17.3588	0
	High	FLVHDAFWALPK	1	4	2	Q05793;E9PZ16		0	0	0.0436	2.9282	2	1443.78	0.315071	21.6812	0
	High	AMLQVHGGSGPR	1	4	2	Q05793;E9PZ16		0	0	0.003132	2.90592	2	1209.61	-2.6247	11.7796	0
	High	ESLEVQIHPSR	2	4	2	Q05793;E9PZ16		0	0	0.01815	2.87761	2	1294.67	-0.428853	13.4382	0
	High	AAGVPSASITWR	1	4	2	Q05793;E9PZ16		0	0	0.0116	2.86189	2	1215.65	-0.69667	15.9396	0
	High	VDGDLPPDSR	1	5	2	Q05793;E9PZ16		0	0	0.02415	2.81931	2	1070.51	-1.65549	10.9556	0
	High	ALSSAGQHVAR	1	4	2	Q05793;E9PZ16		0	0	0.01566	2.75501	2	1096.58	-1.52953	10.7111	0
	High	LSFDQPNDFK	1	4	2	Q05793;E9PZ16		0	0	0.07531	2.72094	2	1210.58	1.1843	15.8163	0
	High	LGTVPQFPR	1	4	2	Q05793;E9PZ16		0	0	0.05409	2.69074	2	1014.57	-0.816183	15.4791	0
	High	EVSEAVVEKLEPEYRK	1	4	2	Q05793;E9PZ16		0	0	0.02943	2.68724	3	1904.99	-1.04533	16.871	2
	High	QPDFISFGLVGGRPEFR	1	4	2	Q05793;E9PZ16		0	0	0.02347	2.62968	3	1921.99	0.6493	21.9999	0
	High	SKSPAYTLVWTR	2	4	2	Q05793;E9PZ16		0	0	0.04391	2.61959	2	1408.76	-0.102921	18.0075	1
	High	cFcmGVSR	1	4	2	Q05793;E9PZ16	C1(Carbamidomethyl); C3(Carbamidomethyl); M4(Oxidation)	0	0	0.03418	2.57036	2	1032.41	-0.799428	11.1133	0
	High	EHLLmALADLDELLVR	1	4	2	Q05793;E9PZ16	M5(Oxidation)	0	0	0.01201	2.55098	3	1867	-1.52658	27.7555	0
	High	GDKVTSYGGELR	2	4	2	Q05793;E9PZ16		0	0	0.04748	2.5052	2	1281.64	-0.5177	12.3545	1
	High	LTVPSSQnSSFR	2	3	2	Q05793;E9PZ16	N8(Deamidated)	0	0	0.0268	2.49215	2	1323.65	-2.11283	13.5671	0
	High	QVQLSEEHWVHESGRPVQR	2	4	2	Q05793;E9PZ16		0	0	0.06913	2.40458	3	2301.15	-0.681224	16.984	0
	High	EDGRPLPSSAQQR	1	4	2	Q05793;E9PZ16		0	0	0.04686	2.39693	3	1440.72	-1.22336	10.7063	0
	High	GKFSSGITGcIK	1	5	2	Q05793;E9PZ16	C10(Carbamidomethyl)	0	0	0.04774	2.36977	2	1254.65	-1.92569	13.9478	1
	High	DPSPGQPSNFIVPFQEQAWQRPDGQPATR	1	4	2	Q05793;E9PZ16		0	0	0.02267	2.31534	3	3250.56	-0.556472	20.393	0
	High	VDSYGGFLR	1	4	2	Q05793;E9PZ16		0	0	0.06467	2.21845	2	1013.5	-0.660254	16.0768	0
	High	QFLGNKVDSYGGFLR	1	4	2	Q05793;E9PZ16		0	0	0.07083	2.18717	2	1700.87	-0.942065	18.9134	1
	High	NLIHTSNSR	1	4	2	Q05793;E9PZ16		0	0	0.07188	2.12932	2	1041.54	-1.04003	10.9583	0
	High	SLPEVPETIEFEVR	1	5	2	Q05793;E9PZ16		0	0	0.022	2.10737	2	1644.85	-1.59698	20.3961	0
	High	QPLVVLQGNNIVLEHHASR	1	4	2	Q05793;E9PZ16		0	0	0.03402	1.99747	4	2124.17	0.13744	18.8244	0
	High	nSQLTGGFTVEPVHDGAR	1	4	2	Q05793;E9PZ16	N1(Deamidated)	0	0	0.07091	1.99446	3	1885.9	-0.616231	16.0019	0
	High	cQVSGSPPHYFYWSR	1	4	2	Q05793;E9PZ16	C1(Carbamidomethyl)	0	0	0.059	1.93521	3	1870.83	-0.763393	17.6959	0
	High	cKPGFFGDATK	1	4	2	Q05793;E9PZ16	C1(Carbamidomethyl)	0	0	0.07046	1.71062	3	1227.58	-1.06776	13.6808	0
	High	cAPGYYGNPSQGQPcHR	1	4	2	Q05793;E9PZ16	C1(Carbamidomethyl); C15(Carbamidomethyl)	0	0	0.06589	1.32482	3	1948.82	0.597051	11.361	0
	High	EVEQcTcPPGYR	1	4	2	Q05793;E9PZ16	C5(Carbamidomethyl); C7(Carbamidomethyl)	0	0.001	0.1128	3.57109	2	1495.63	-0.122141	11.2307	0
	High	EGGQLPPGHSVQDGVLR	1	4	2	Q05793;E9PZ16		0	0.001	0.1399	3.03177	2	1745.89	-0.220848	13.3964	0
	High	LRSPVISIEPPSSTVQQGQDASFK	1	3	2	Q05793;E9PZ16		0	0.001	0.103	2.98928	3	2571.34	-0.125497	17.8551	1
	High	cLcLPGFSGPR	1	5	2	Q05793;E9PZ16	C1(Carbamidomethyl); C3(Carbamidomethyl)	0	0.001	0.1271	2.84471	2	1263.6	-1.547	18.5119	0
	High	GHTPTHPGTLNQR	1	4	2	Q05793;E9PZ16		0	0.001	0.1772	2.62176	3	1415.71	-0.07207	11.1852	0
	High	LRAPLPWQHR	1	3	2	Q05793;E9PZ16		0	0.001	0.09166	2.59487	3	1273.73	-1.31463	17.0937	1
	High	VIPYFTQTPYSFLPLPTIK	2	5	2	Q05793;E9PZ16		0	0.001	0.1518	2.45946	3	2225.22	-1.11521	25.8222	0
	High	RLGTVPQFPR	1	4	2	Q05793;E9PZ16		0	0.001	0.1194	2.36472	3	1170.67	-0.15837	15.6784	1
	High	APLPWQHR	1	3	2	Q05793;E9PZ16		0	0.001	0.1341	2.23992	2	1004.54	0.330442	14.1588	0
	High	AQIHNGILR	1	4	2	Q05793;E9PZ16		0	0.001	0.09742	2.20432	2	1021.59	-0.343569	12.4871	0
	High	SYEIIFR	1	4	2	Q05793;E9PZ16		0	0.001	0.1388	2.06745	2	927.494	0.114903	17.3727	0
	High	FSSGITGcIK	1	5	2	Q05793;E9PZ16	C8(Carbamidomethyl)	0	0.001	0.1562	2.03859	2	1069.53	-1.58828	13.7695	0
	High	AQIHnGILR	1	4	2	Q05793;E9PZ16	N5(Deamidated)	0	0.001	0.08903	2.01903	2	1022.57	-0.947168	12.6623	0
	High	LNWGHIPAHPR	1	4	2	Q05793;E9PZ16		0	0.001	0.1075	1.97044	3	1297.69	-0.269077	16.5934	0
	High	LTVPSSQNSSFR	1	3	2	Q05793;E9PZ16		0	0.001	0.1041	1.86559	2	1322.67	-1.46292	13.3297	0
	High	ATFSSVPR	1	4	2	Q05793;E9PZ16		0	0.001	0.1071	1.8246	2	864.456	-1.25498	11.9251	0
	High	mFGLmnSHAmLK	1	3	2	Q05793;E9PZ16	M1(Oxidation); M5(Oxidation); N6(Deamidated); M10(Oxidation)	0	0.001	0.1507	1.78388	3	1428.63	-1.30906	14.1129	0
	High	SIEYSPQLEDASAKEFR	1	4	2	Q05793;E9PZ16		0	0.001	0.1154	1.74235	3	1969.95	-0.563704	16.404	1
	High	SVVPQGGPHSLR	1	4	2	Q05793;E9PZ16		0	0.005	0.2198	2.04802	2	1233.67	-0.439484	11.9769	0
	High	RSYEIIFR	1	4	2	Q05793;E9PZ16		0	0.006	0.236	2.30645	2	1083.59	0.281407	17.0657	1
	High	VPGGPYLGTcSGcNcnGHASScDPVYGHcLncQHNTEGPQcDK	2	4	2	Q05793;E9PZ16	C10(Carbamidomethyl); C13(Carbamidomethyl); C15(Carbamidomethyl); N16(Deamidated); C22(Carbamidomethyl); C29(Carbamidomethyl); N31(Deamidated); C32(Carbamidomethyl); C41(Carbamidomethyl)	0	0.007	0.2505	4.44303	5	4823.9	3.82221	15.6573	0
	High	VTSYGGELR	1	4	2	Q05793;E9PZ16		0	0.008	0.275	2.25911	2	981.5	-0.0353911	11.766	0
E9QPE7	Myosin-11 OS=Mus musculus GN=Myh11 PE=1 SV=1 - [E9QPE7_MOUSE]	468.024	52.73	8	93	103	142	1938	223.219	5.50342
	A2	Sequence	# PSMs	# Proteins	# Protein Groups	Protein Group Accessions	Modifications	ΔCn	q-Value	PEP	XCorr	Charge	MH+ [Da]	ΔM [ppm]	RT [min]	# Missed Cleavages
	High	TQLEELEDELQATEDAK	1	13	2	Q8VDD5;E9QPE7		0	0	0.0005424	6.2987	2	1961.92	-0.961129	20.6366	0
	High	mAQQmLDLEEQLEEEEAAR	2	4	1	E9QPE7	M1(Oxidation); M5(Oxidation)	0	0	0.0004459	6.01183	3	2295.01	-0.780165	18.0199	0
	High	IAQLEEELEEEQGNmEAmSDR	2	4	1	E9QPE7	M15(Oxidation); M18(Oxidation)	0	0	0.0006024	5.6801	2	2483.05	-0.394121	16.3825	0
	High	TLLQEQLQAETELYAEAEEmR	2	3	1	E9QPE7	M20(Oxidation)	0	0	0.0006219	5.50094	2	2511.19	-1.30137	22.2121	0
	High	KATLQAEQLSNELATER	2	4	1	E9QPE7		0	0	0.0006739	5.4422	2	1901.99	-0.993157	16.3703	1
	High	LQNEVESVTGmLNEAEGK	2	4	1	E9QPE7	M11(Oxidation)	0	0	0.0008169	5.42353	2	1963.93	0.541927	16.4766	0
	High	KmAQQmLDLEEQLEEEEAAR	1	4	1	E9QPE7	M2(Oxidation); M6(Oxidation)	0	0	0.001432	5.42054	3	2423.1	-1.21722	17.9467	1
	High	DVASLGSQLQDTQELLQEETR	2	4	1	E9QPE7		0	0	0.0001347	5.21538	3	2360.16	-0.156579	21.8029	0
	High	LQQLFNHTmFILEQEEYQR	1	12	2	Q8VDD5;E9QPE7	M9(Oxidation)	0	0	0.0003683	5.10579	3	2483.2	-2.3961	20.1089	0
	High	LEDDILVmDDQNSK	1	4	1	E9QPE7	M8(Oxidation)	0	0	0.0004852	5.01348	2	1650.76	1.88439	15.0918	0
	High	QLLQANPILEAFGNAK	2	8	2	E9QPE7;Q8VDD5		0	0	0.003048	4.99886	2	1726.95	1.01668	22.7081	0
	High	SGKLDAFLVLEQLR	2	4	1	E9QPE7		0	0	0.009475	4.77518	2	1588.91	0.0818726	23.4065	1
	High	SLEADLmQLQEDLAAAER	1	4	1	E9QPE7	M7(Oxidation)	0	0	0.009292	4.77498	2	2018.97	0.358808	25.6173	0
	High	NmDPLNDNVTSLLNASSDK	1	4	1	E9QPE7	M2(Oxidation)	0	0	0.002165	4.75506	2	2063.96	0.492252	19.1829	0
	High	LQQELDDLVVDLDNQR	2	4	1	E9QPE7		0	0	0.002019	4.7109	3	1912.96	-1.21063	21.162	0
	High	ATLQAEQLSNELATER	2	4	1	E9QPE7		0	0	0.0003734	4.70967	2	1773.9	-0.92764	16.6517	0
	High	LQDFASTIEVmEEGK	1	4	1	E9QPE7	M11(Oxidation)	0	0	0.0006846	4.68892	2	1712.8	-0.629239	16.9287	0
	High	NFmNSPmAQADWVAK	1	4	1	E9QPE7	M3(Oxidation); M7(Oxidation)	0	0	0.007566	4.6783	2	1741.77	0.0874706	14.8996	0
	High	VSDLTTNLAEEEEK	1	4	1	E9QPE7		0	0	0.00154	4.67534	2	1577.75	-0.905183	14.3221	0
	High	IKKLEDDILVmDDQNSK	1	4	1	E9QPE7	M11(Oxidation)	0	0	0.001008	4.67142	3	2020.03	-0.351548	16.085	2
	High	LQKEmEGLSQQYEEK	1	4	1	E9QPE7	M5(Oxidation)	0	0	0.001355	4.63618	3	1855.87	-1.01659	11.6119	1
	High	IAQLEEQVEQEAR	1	4	1	E9QPE7		0	0	0.004942	4.62634	2	1542.77	-1.40789	14.8371	0
	High	KQADLEKEELAEELASSLSGR	2	4	1	E9QPE7		0	0	0.002107	4.51381	3	2303.17	-2.03608	21.935	2
	High	KLEGDLKDLELQADSAIK	1	4	1	E9QPE7		0	0	0.0229	4.48781	3	1986.07	-0.582739	20.5955	2
	High	NSLQDQLDEEmEAK	1	4	1	E9QPE7	M11(Oxidation)	0	0	0.003417	4.45313	2	1665.73	0.0950281	13.6448	0
	High	ALEEALEAKEELER	2	4	1	E9QPE7		0	0	0.001828	4.4083	2	1629.83	-0.47754	15.8947	1
	High	ELEGHISDLQEDLDSER	1	4	1	E9QPE7		0	0	0.0003005	4.40181	3	1984.91	-0.426607	16.8926	0
	High	VVSSVLQLGNIVFK	1	4	1	E9QPE7		0	0	0.002552	4.39729	2	1502.89	-0.128288	23.1513	0
	High	LDAFLVLEQLR	1	4	1	E9QPE7		0	0	0.009462	4.33687	2	1316.76	-0.432756	24.1497	0
	High	IRELEGHISDLQEDLDSER	2	4	1	E9QPE7		0	0	0.008046	4.31062	3	2254.09	-0.785966	18.2577	1
	High	HVSTLNIQLSDSKK	1	4	1	E9QPE7		0	0	0.003924	4.21692	3	1569.86	-0.984775	15.2007	1
	High	VVSSVLQLGNIVFKK	2	4	1	E9QPE7		0	0	0.01619	4.20545	2	1630.99	-1.24045	22.0963	1
	High	VEDmAELTcLNEASVLHNLR	1	4	1	E9QPE7	M4(Oxidation); C9(Carbamidomethyl)	0	0	0.0006661	4.19431	3	2330.11	-1.68238	19.649	0
	High	ELDEATESNEAMGR	1	4	1	E9QPE7		0	0	0.001809	4.14997	2	1551.66	-1.10398	11.8078	0
	High	HTQAVEELTEQLEQFKR	1	4	1	E9QPE7		0	0	0.006083	4.134	3	2086.06	1.07746	21.2592	1
	High	HVSTLNIQLSDSK	2	4	1	E9QPE7		0	0	0.005156	4.12234	3	1441.76	-1.91943	14.9914	0
	High	QLEDERNSLQDQLDEEmEAK	1	4	1	E9QPE7	M17(Oxidation)	0	0	0.0001039	4.12195	3	2436.08	-0.35127	14.9422	1
	High	SmLQDREDQSILcTGESGAGK	1	6	1	E9QPE7	M2(Oxidation); C13(Carbamidomethyl)	0	0	0.01548	4.09322	3	2298.03	-0.922501	14.0323	1
	High	NTDQASMPDNTAAQK	1	5	2	Q8VDD5;E9QPE7		0	0	0.002432	4.09243	2	1591.7	-2.09804	10.7514	0
	High	KQELEEILHEmEAR	2	4	1	E9QPE7	M11(Oxidation)	0	0	0.01394	4.0814	3	1770.87	-0.925802	17.3754	1
	High	KVIQYLAVVASSHK	1	3	1	E9QPE7		0	0	0.006931	4.07086	3	1542.9	0.126069	18.3076	1
	High	NRLQQELDDLVVDLDNQR	1	4	1	E9QPE7		0	0	0.01183	4.05752	3	2183.1	-0.36509	25.4229	1
	High	ELDEATESNEAmGR	1	4	1	E9QPE7	M12(Oxidation)	0	0	0.008504	3.98994	2	1567.65	-0.885872	10.8753	0
	High	LKEVLLQVEDER	1	4	1	E9QPE7		0	0	0.006778	3.92142	2	1470.82	-0.733032	16.5689	1
	High	LEVQLQDLQSK	1	4	1	E9QPE7		0	0	0.01541	3.79151	2	1300.71	-0.672582	15.9748	0
	High	LEEEEDRGQQLQAER	2	3	1	E9QPE7		0	0	0.0008061	3.74634	3	1829.86	-0.0220726	11.128	1
	High	DKTEFSIIHYAGK	1	4	1	E9QPE7		0	0	0.01784	3.74589	3	1508.77	-1.05418	17.1122	1
	High	EMEGLSQQYEEK	1	4	1	E9QPE7		0	0	0.003442	3.7354	2	1470.64	-1.23832	12.7162	0
	High	HEmPPHIYAIADTAYR	1	4	1	E9QPE7	M3(Oxidation)	0	0	0.005632	3.73184	3	1900.9	-2.57402	17.6745	0
	High	ITDVImAFQAmcR	1	4	1	E9QPE7	M6(Oxidation); M11(Oxidation); C12(Carbamidomethyl)	0	0	0.01178	3.72726	2	1587.73	-0.870669	18.1835	0
	High	EmEGLSQQYEEK	1	4	1	E9QPE7	M2(Oxidation)	0	0	0.02346	3.68029	2	1486.64	-0.92477	11.4064	0
	High	QRYEILAANAIPK	2	4	1	E9QPE7		0	0	0.01505	3.55306	3	1486.84	-0.0549478	17.2393	1
	High	LQDFASTIEVMEEGK	1	4	1	E9QPE7		0	0	0.004033	3.55119	2	1696.81	-0.106858	20.6779	0
	High	QADLEKEELAEELASSLSGR	1	4	1	E9QPE7		0	0	0.01333	3.53412	3	2175.08	-0.781312	20.9747	1
	High	VIQYLAVVASSHK	2	4	1	E9QPE7		0	0	0.002803	3.51751	2	1414.8	-0.759457	17.2899	0
	High	TFHIFYYLLAGAK	2	4	1	E9QPE7		0	0	0.03135	3.508	3	1543.83	-1.75096	24.4959	0
	High	VDYNASAWLTK	1	4	1	E9QPE7		0	0	0.03606	3.49965	2	1267.63	-0.87444	17.4129	0
	High	VcHLVGINVTDFTR	2	4	1	E9QPE7	C2(Carbamidomethyl)	0	0	0.002964	3.49616	2	1630.84	0.241988	19.2251	0
	High	VSDLTTNLAEEEEKAK	2	4	1	E9QPE7		0	0	0.01149	3.44322	2	1776.88	-1.70241	14.8635	1
	High	EVLLQVEDER	1	4	1	E9QPE7		0	0	0.01429	3.24793	2	1229.63	-2.0983	15.3041	0
	High	QLHEYETELEDER	1	4	1	E9QPE7		0	0	0.02653	3.21946	2	1690.75	-1.2999	14.2174	0
	High	QTLEKENADLAGELR	2	4	1	E9QPE7		0	0	0.01838	3.07046	2	1686.87	-0.084841	14.9392	1
	High	KLEVQLQDLQSK	2	4	1	E9QPE7		0	0	0.03736	3.05886	3	1428.8	-0.706638	15.6427	1
	High	KEEELQAALAR	1	5	2	Q8VDD5;E9QPE7		0	0	0.02289	3.05693	2	1257.68	-1.71061	13.7549	1
	High	LKEVLLQVEDERK	1	4	1	E9QPE7		0	0	0.01265	3.05666	3	1598.91	-0.0715081	16.599	2
	High	TEFSIIHYAGK	2	4	1	E9QPE7		0	0	0.03255	3.05365	2	1265.65	-0.858462	16.6733	0
	High	SKHESmISELEVR	2	4	1	E9QPE7	M6(Oxidation)	0	0	0.02465	3.04857	3	1560.77	-1.20933	15.454	1
	High	cNGVLEGIR	1	35	5	E9QPE7;B2RWX0;Q5SX39;G3UW82;Q8VDD5	C1(Carbamidomethyl)	0	0	0.02807	3.03184	2	1017.51	-0.849906	13.9692	0
	High	YEILAANAIPK	1	4	1	E9QPE7		0	0	0.01793	2.98226	2	1202.68	-1.09585	17.1451	0
	High	TGVLAHLEEER	2	4	1	E9QPE7		0	0	0.03436	2.96495	2	1253.65	-1.08402	15.1859	0
	High	cnGVLEGIR	1	35	5	E9QPE7;B2RWX0;Q5SX39;G3UW82;Q8VDD5	C1(Carbamidomethyl); N2(Deamidated)	0	0	0.005792	2.96016	2	1018.5	-0.137045	14.6543	0
	High	QKHTQAVEELTEQLEQFKR	2	4	1	E9QPE7		0	0	0.08102	2.9319	4	2342.21	-0.994358	24.3763	2
	High	KLQDFASTIEVmEEGK	1	4	1	E9QPE7	M12(Oxidation)	0	0	0.03349	2.92718	3	1840.89	-5.23411	17.0597	1
	High	MTESSLPSASK	1	4	1	E9QPE7		0	0	0.0759	2.83126	2	1137.54	-0.831587	11.28	0
	High	TLLQEQLQAETELYAEAEEmRVR	1	3	1	E9QPE7	M20(Oxidation)	0	0	0.03822	2.70635	3	2766.36	0.937546	22.0993	1
	High	EQADFAIEALAK	1	7	2	Q8VDD5;E9QPE7		0	0	0.06883	2.66626	2	1305.67	-0.713169	18.4855	0
	High	QLEEAEEESQR	1	3	1	E9QPE7		0	0	0.07173	2.66356	2	1347.6	-1.53901	10.7592	0
	High	QLHEYETELEDERK	2	4	1	E9QPE7		0	0	0.04122	2.66264	3	1818.85	-0.611328	14.3518	1
	High	ASRDEIFATSK	1	4	1	E9QPE7		0	0	0.06242	2.64832	2	1224.62	-0.96043	12.5181	1
	High	KRHEmPPHIYAIADTAYR	4	4	1	E9QPE7	M5(Oxidation)	0	0	0.02231	2.6374	4	2185.1	1.16967	27.5687	2
	High	KQELEEILHEMEAR	1	4	1	E9QPE7		0	0	0.01753	2.633	3	1754.87	-1.39726	22.7357	1
	High	FDQLLAEEK	1	17	2	E9QPE7;Q8VDD5		0	0	0.03668	2.58901	2	1092.56	-0.823104	14.2928	0
	High	mTESSLPSASK	1	4	1	E9QPE7	M1(Oxidation)	0	0	0.04695	2.5391	2	1153.54	-1.38554	10.7567	0
	High	SHEAQVQEMR	1	4	1	E9QPE7		0	0	0.03613	2.52088	2	1214.56	-0.52407	10.9146	0
	High	AAAYDKLEK	1	4	1	E9QPE7		0	0	0.08508	2.49044	2	1008.54	-0.143802	11.2776	1
	High	LKSTVAALEAK	1	4	1	E9QPE7		0	0	0.04084	2.45595	2	1130.68	-1.39041	12.913	1
	High	ALELDPNLYR	1	11	1	E9QPE7		0	0	0.03687	2.40147	2	1203.64	-0.484559	17.7201	0
	High	HESmISELEVR	1	4	1	E9QPE7	M4(Oxidation)	0	0	0.08702	2.26648	2	1345.64	0.50183	14.1646	0
	High	IVGLDQMAK	1	4	1	E9QPE7		0	0	0.03982	2.21982	2	974.533	-1.07308	14.7293	0
	High	ALEEALEAK	1	10	1	E9QPE7		0	0	0.04508	1.89186	2	973.52	-0.170762	12.866	0
	High	LRGPPPQETSQ	1	1	1	E9QPE7		0	0.001	0.106	3.18528	2	1209.62	-1.5479	10.7161	1
	High	AETELKELEQK	1	4	1	E9QPE7		0	0.001	0.1417	2.94689	2	1317.69	-1.7271	13.2056	1
	High	VTVGKDDIQK	1	4	1	E9QPE7		0	0.001	0.1037	2.81787	2	1102.61	-1.03649	10.9498	1
	High	ASRDEIFATSKENEK	1	4	1	E9QPE7		0	0.001	0.1876	2.71776	3	1724.84	-0.416172	12.7765	2
	High	LEVNmQALK	1	4	1	E9QPE7	M5(Oxidation)	0	0.001	0.1494	2.56389	2	1061.57	-0.277772	12.2926	0
	High	KFDQLLAEEK	2	17	2	E9QPE7;Q8VDD5		0	0.001	0.1434	2.47672	2	1220.65	0.0638826	14.7596	1
	High	AEmEDLVSSKDDVGK	1	4	1	E9QPE7	M3(Oxidation)	0	0.001	0.09621	2.12469	3	1638.75	-1.05846	11.5351	1
	High	QAcILmIK	1	4	1	E9QPE7	C3(Carbamidomethyl); M6(Oxidation)	0	0.001	0.1563	1.92092	2	992.526	-0.931795	14.9213	0
	High	LQDFASTIEVmEEGKK	1	4	1	E9QPE7	M11(Oxidation)	0	0.001	0.1706	1.88921	3	1840.9	-0.0618961	16.1931	1
	High	QLVSNLEK	1	10	1	E9QPE7		0	0.001	0.1615	1.50618	2	930.525	-0.668862	12.1349	0
	High	YLPIYSEK	1	4	1	E9QPE7		0	0.001	0.137	1.33211	2	1012.53	-0.272319	14.6991	0
	High	REQEVTVLKK	1	4	1	E9QPE7		0	0.002	0.1995	2.40747	3	1229.72	-0.285363	12.1925	2
	High	TGVLAHLEEERDLK	1	4	1	E9QPE7		0	0.002	0.2043	2.18048	3	1609.85	-0.471109	17.0347	1
	High	VKPLLQVTR	1	12	1	E9QPE7		0	0.002	0.2028	1.73918	2	1053.68	-0.498765	14.1912	0
	High	ENADLAGELR	1	4	1	E9QPE7		0	0.004	0.2101	2.39662	2	1087.54	-2.35889	13.3615	0
	High	NTTPNFVR	1	3	1	E9QPE7		0	0.004	0.2123	1.62302	2	948.489	-1.28448	12.1633	0
	High	KLVWVPSEK	1	4	1	E9QPE7		0	0.006	0.2406	2.34426	2	1085.64	0.011307	15.7262	1
	High	LDEEIAQK	1	3	1	E9QPE7		0	0.006	0.2348	2.12385	2	945.488	-0.435136	11.079	0
	High	TVGQLYK	1	14	2	E9QPE7;Q8VDD5		0	0.008	0.2739	1.60549	2	808.456	-0.685491	11.615	0
F8VQJ3	Laminin subunit gamma-1 OS=Mus musculus GN=Lamc1 PE=4 SV=1 - [F8VQJ3_MOUSE]	434.431	55.63	11	75	75	125	1607	177.074	5.18604
	A2	Sequence	# PSMs	# Proteins	# Protein Groups	Protein Group Accessions	Modifications	ΔCn	q-Value	PEP	XCorr	Charge	MH+ [Da]	ΔM [ppm]	RT [min]	# Missed Cleavages
	High	AcAcNPYGTVQQQSScNPVTGQcQcLPHVSGR	2	2	1	F8VQJ3	C2(Carbamidomethyl); C4(Carbamidomethyl); C16(Carbamidomethyl); C23(Carbamidomethyl); C25(Carbamidomethyl)	0	0	0.0004008	7.49595	4	3621.55	-1.35856	15.372	0
	High	LGNTEAcSPcHcSPVGSLSTQcDSYGR	1	3	1	F8VQJ3	C7(Carbamidomethyl); C10(Carbamidomethyl); C12(Carbamidomethyl); C22(Carbamidomethyl)	0	0	0.0008573	6.54533	3	3000.23	-0.00846392	14.1556	0
	High	LcRPcQcNDNIDPNAVGNcNR	2	2	1	F8VQJ3	C2(Carbamidomethyl); C5(Carbamidomethyl); C7(Carbamidomethyl); C19(Carbamidomethyl)	0	0	0.0001444	6.27203	3	2547.07	-0.953625	12.307	0
	High	AVEIYASVAQLTPVDSEALENEANK	2	5	1	F8VQJ3		0	0	1.93494e-05	6.23834	3	2661.32	-0.744299	20.8264	0
	High	AGDKAVEIYASVAQLTPVDSEALENEANK	1	5	1	F8VQJ3		0	0	0.001017	5.99517	3	3032.5	-0.6829	21.3859	1
	High	cELcDDGYFGDPLGSnGPVR	1	2	1	F8VQJ3	C1(Carbamidomethyl); C4(Carbamidomethyl); N16(Deamidated)	0	0	0.001183	5.94363	2	2228.92	0.436149	19.4528	0
	High	TREDGPWIPYQYYSGScENTYSK	1	3	1	F8VQJ3	C17(Carbamidomethyl)	0	0	0.001485	5.84362	3	2801.22	0.316682	18.7567	1
	High	LGnTEAcSPcHcSPVGSLSTQcDSYGR	2	3	1	F8VQJ3	N3(Deamidated); C7(Carbamidomethyl); C10(Carbamidomethyl); C12(Carbamidomethyl); C22(Carbamidomethyl)	0	0	0.001518	5.68298	3	3001.22	2.18551	14.4659	0
	High	LQELESLIAnLGTGDDmVTDQAFEDR	1	2	1	F8VQJ3	N10(Deamidated); M17(Oxidation)	0	0	0.0009241	5.6423	3	2897.34	1.39286	23.9533	0
	High	DcGTcDPGYYNLQSGQGcER	2	2	1	F8VQJ3	C2(Carbamidomethyl); C5(Carbamidomethyl); C18(Carbamidomethyl)	0	0	0.001233	5.58239	2	2336.9	-0.33538	13.8329	0
	High	RcELcDDGYFGDPLGSNGPVR	1	2	1	F8VQJ3	C2(Carbamidomethyl); C5(Carbamidomethyl)	0	0	0.009909	5.24377	3	2384.03	-2.0462	18.6585	1
	High	SRVESTEQLIEIASR	2	4	1	F8VQJ3		0	0	0.0009603	5.23744	2	1717.91	-0.34057	18.4049	1
	High	TFGEVTDLDNEVNGmLR	2	6	1	F8VQJ3	M15(Oxidation)	0	0	0.01375	5.20476	2	1925.89	-1.01284	18.2115	0
	High	EAQLALGNAAADATEAK	2	6	1	F8VQJ3		0	0	0.0003999	5.02798	2	1643.82	-1.08063	14.8287	0
	High	cELcDDGYFGDPLGSNGPVR	2	2	1	F8VQJ3	C1(Carbamidomethyl); C4(Carbamidomethyl)	0	0	0.0001217	5.0106	2	2227.94	-0.382282	19.0974	0
	High	ATAESASEcLPcDcnGR	2	2	1	F8VQJ3	C9(Carbamidomethyl); C12(Carbamidomethyl); C14(Carbamidomethyl); N15(Deamidated)	0	0	0.0001531	5.00808	2	1898.73	-0.545112	11.8171	0
	High	GKAEQQTADQLLAR	2	6	1	F8VQJ3		0	0	0.003447	4.98737	2	1528.81	-1.25294	13.7524	1
	High	cDcHALGSTnGQcDIR	4	2	1	F8VQJ3	C1(Carbamidomethyl); C3(Carbamidomethyl); N10(Deamidated); C13(Carbamidomethyl)	0	0	0.0004304	4.97776	2	1864.74	0.229055	11.5614	0
	High	VKLQELESLIANLGTGDDmVTDQAFEDR	2	2	1	F8VQJ3	M19(Oxidation)	0	0	0.002238	4.95072	3	3123.51	-1.28468	25.8	1
	High	ATAESASEcLPcDcNGR	2	2	1	F8VQJ3	C9(Carbamidomethyl); C12(Carbamidomethyl); C14(Carbamidomethyl)	0	0	0.002941	4.90296	2	1897.75	-0.0913285	11.5972	0
	High	AVEIYASVAqLTPVDSEALENEANK	1	5	1	F8VQJ3	Q10(Deamidated)	0	0	0.00702	4.87169	3	2662.33	6.88746	21.0644	0
	High	RcELcDDGYFGDPLGSnGPVR	1	2	1	F8VQJ3	C2(Carbamidomethyl); C5(Carbamidomethyl); N17(Deamidated)	0	0	0.00159	4.85642	3	2385.03	1.55995	18.8704	1
	High	cQPGFHSLTEAGcRPcScDPSGSTDEcNVETGR	2	2	1	F8VQJ3	C1(Carbamidomethyl); C13(Carbamidomethyl); C16(Carbamidomethyl); C18(Carbamidomethyl); C27(Carbamidomethyl)	0	0	0.009156	4.84491	4	3728.48	-2.14447	14.5399	0
	High	LSAEDLVLEGAGLR	2	3	1	F8VQJ3		0	0	0.02021	4.81473	2	1442.78	-0.719549	21.1338	0
	High	LNTFGDEVFNDPK	1	2	1	F8VQJ3		0	0	0.001466	4.70603	2	1495.7	-1.11104	17.0028	0
	High	cDQcEENYFYNR	1	2	1	F8VQJ3	C1(Carbamidomethyl); C4(Carbamidomethyl)	0	0	0.002158	4.68749	2	1697.63	-0.74013	14.1939	0
	High	cKEGFFGNPLAPNPADK	2	2	1	F8VQJ3	C1(Carbamidomethyl)	0	0	0.01663	4.66893	2	1861.89	-0.885067	17.9188	1
	High	TGQcEcQPGITGQHcER	1	2	1	F8VQJ3	C4(Carbamidomethyl); C6(Carbamidomethyl); C15(Carbamidomethyl)	0	0	0.001298	4.58177	3	2017.82	-1.73286	10.7755	0
	High	VSVPLIAQGNSYPSETTVK	2	3	1	F8VQJ3		0	0	0.001202	4.48101	2	1990.05	1.17583	17.3085	0
	High	cVcKDNVEGFNcER	2	3	1	F8VQJ3	C1(Carbamidomethyl); C3(Carbamidomethyl); C12(Carbamidomethyl)	0	0	0.01001	4.43137	3	1786.73	-1.30275	12.1893	1
	High	VESTEQLIEIASR	1	4	1	F8VQJ3		0	0	0.003732	4.24323	2	1474.77	-0.830047	18.3505	0
	High	cDcHALGSTNGQcDIR	1	2	1	F8VQJ3	C1(Carbamidomethyl); C3(Carbamidomethyl); C13(Carbamidomethyl)	0	0	0.0005553	4.23367	3	1863.75	-0.822123	11.4346	0
	High	VSVPLIAQGnSYPSETTVK	1	3	1	F8VQJ3	N10(Deamidated)	0	0	0.0129	4.19995	2	1991.04	3.99188	17.6805	0
	High	SYYYAISDFAVGGR	1	3	1	F8VQJ3		0	0	0.001485	4.02173	2	1568.74	-0.737724	19.8033	0
	High	NEFDKLmcNcK	2	3	1	F8VQJ3	M7(Oxidation); C8(Carbamidomethyl); C10(Carbamidomethyl)	0	0	0.02086	3.98378	2	1474.61	-0.200835	12.5384	1
	High	EAQLALGnAAADATEAK	1	6	1	F8VQJ3	N8(Deamidated)	0	0	0.001865	3.95985	2	1644.81	-0.267992	14.2351	0
	High	STLQEANDILNNLKDFDR	2	4	1	F8VQJ3		0	0	0.02075	3.91739	2	2106.04	-1.89805	23.3778	1
	High	TFGEVTDLDnEVNGmLR	3	6	1	F8VQJ3	N10(Deamidated); M15(Oxidation)	0	0	0.007385	3.87902	2	1926.88	2.65831	17.4871	0
	High	AEQQTADQLLAR	1	6	1	F8VQJ3		0	0	0.01213	3.85525	2	1343.69	-0.619148	13.5116	0
	High	EDGPWIPYQYYSGScENTYSK	1	3	1	F8VQJ3	C15(Carbamidomethyl)	0	0	0.01416	3.78362	2	2544.07	0.640412	19.4465	0
	High	DGSEASLEWSSDR	1	3	1	F8VQJ3		0	0	0.00285	3.7453	2	1438.61	-0.141487	14.376	0
	High	LHEATDYPWRPALSPFEFQK	2	3	1	F8VQJ3		0	0	0.06807	3.64984	3	2432.2	-3.38243	22.3971	0
	High	QDIAVISDSYFPR	1	3	1	F8VQJ3		0	0	0.007204	3.64916	2	1510.75	-0.553422	19.1525	0
	High	STLQEANDILNNLK	1	5	1	F8VQJ3		0	0	0.01015	3.63252	2	1572.82	-0.879037	20.307	0
	High	TKEVVcTHcPTGTAGK	1	2	1	F8VQJ3	C6(Carbamidomethyl); C9(Carbamidomethyl)	0	0	0.007912	3.61603	3	1745.83	-1.1666	10.9863	1
	High	KQEAAImDYNR	2	6	1	F8VQJ3	M7(Oxidation)	0	0	0.03592	3.61548	3	1354.64	-1.33201	11.1614	1
	High	ETPSLGPYSPcVLcTcnGHSETcDPETGVcDcRDNTAGPHcEK	2	3	1	F8VQJ3	C11(Carbamidomethyl); C14(Carbamidomethyl); C16(Carbamidomethyl); N17(Deamidated); C23(Carbamidomethyl); C30(Carbamidomethyl); C32(Carbamidomethyl); C41(Carbamidomethyl)	0	0	0.04011	3.61359	5	4925.96	1.43816	17.9435	1
	High	DIAEIIKDIHNLEDIKK	3	6	1	F8VQJ3		0	0	0.03764	3.58313	3	2007.11	-0.529698	27.0694	2
	High	EAQEVKDVDQNLmDR	2	4	1	F8VQJ3	M13(Oxidation)	0	0	0.02397	3.54023	2	1805.83	-0.32282	12.7433	1
	High	EGFFGNPLAPNPADK	1	2	1	F8VQJ3		0	0	0.01657	3.53487	2	1573.76	0.125055	19.0657	0
	High	QLEEAENELKK	2	5	1	F8VQJ3		0	0	0.03396	3.40482	3	1330.68	-0.719319	11.6885	1
	High	VSDLESEAR	1	6	1	F8VQJ3		0	0	0.00968	3.31301	2	1005.48	-0.599554	11.0082	0
	High	RATAESASEcLPcDcnGR	1	2	1	F8VQJ3	C10(Carbamidomethyl); C13(Carbamidomethyl); C15(Carbamidomethyl); N16(Deamidated)	0	0	0.009307	3.29189	3	2054.84	1.36848	11.6962	1
	High	NTIEETGILAER	1	4	1	F8VQJ3		0	0	0.01417	3.27828	2	1345.69	-0.637152	15.3962	0
	High	cIYNTAGFYcDR	1	2	1	F8VQJ3	C1(Carbamidomethyl); C10(Carbamidomethyl)	0	0	0.03484	3.25655	2	1539.64	-0.160944	15.8591	0
	High	LnTFGDEVFNDPK	1	2	1	F8VQJ3	N2(Deamidated)	0	0	0.06966	3.23131	2	1496.69	-1.35981	17.5126	0
	High	cKPGFFNLESSNPK	1	3	1	F8VQJ3	C1(Carbamidomethyl)	0	0	0.01401	3.20948	2	1624.78	-0.237151	16.621	0
	High	RATAESASEcLPcDcNGR	1	2	1	F8VQJ3	C10(Carbamidomethyl); C13(Carbamidomethyl); C15(Carbamidomethyl)	0	0	0.06188	3.2054	3	2053.85	-0.945314	11.6176	1
	High	EAADLDRLIDQK	1	5	1	F8VQJ3		0	0	0.01519	3.19975	2	1386.72	-0.229176	16.1235	1
	High	HNTYGVDcEK	1	3	1	F8VQJ3	C8(Carbamidomethyl)	0	0	0.05655	3.10615	2	1222.51	-0.758431	10.8307	0
	High	HKQEADDIVR	2	4	1	F8VQJ3		0	0	0.05854	3.08358	3	1210.62	-0.911193	11.9884	1
	High	DNVEGFNcER	1	3	1	F8VQJ3	C8(Carbamidomethyl)	0	0	0.01851	2.96954	2	1239.51	-0.613751	11.8781	0
	High	ETPSLGPYSPcVLcTcnGHSETcDPETGVcDcR	1	3	1	F8VQJ3	C11(Carbamidomethyl); C14(Carbamidomethyl); C16(Carbamidomethyl); N17(Deamidated); C23(Carbamidomethyl); C30(Carbamidomethyl); C32(Carbamidomethyl)	0	0	0.07154	2.9246	3	3816.52	3.71821	17.4782	0
	High	ETPSLGPYSPcVLcTcNGHSETcDPETGVcDcR	1	3	1	F8VQJ3	C11(Carbamidomethyl); C14(Carbamidomethyl); C16(Carbamidomethyl); C23(Carbamidomethyl); C30(Carbamidomethyl); C32(Carbamidomethyl)	0	0	0.01684	2.90004	3	3815.51	-1.5578	17.5031	0
	High	EAQEVKDVDQNLMDR	1	4	1	F8VQJ3		0	0	0.02789	2.89913	3	1789.84	-1.98073	14.3251	1
	High	LNEIEGSLNK	1	6	1	F8VQJ3		0	0	0.03128	2.88331	2	1116.59	-0.268947	12.5328	0
	High	KVSDLESEAR	1	6	1	F8VQJ3		0	0	0.01769	2.61719	2	1133.58	-0.746555	11.1557	1
	High	TLPTGcFNTPSIEKP	1	6	1	F8VQJ3	C6(Carbamidomethyl)	0	0	0.02267	2.52454	2	1661.82	-0.247567	16.8147	0
	High	KQEAAIMDYNR	1	6	1	F8VQJ3		0	0	0.05566	2.4956	2	1338.65	1.83949	12.7494	1
	High	SWPGcQEcPAcYR	1	2	1	F8VQJ3	C5(Carbamidomethyl); C8(Carbamidomethyl); C11(Carbamidomethyl)	0	0	0.0543	2.49006	2	1670.65	-1.00906	13.9	0
	High	EVVcTHcPTGTAGKR	1	2	1	F8VQJ3	C4(Carbamidomethyl); C7(Carbamidomethyl)	0	0	0.03054	2.39611	3	1672.79	-0.87356	10.9345	1
	High	TAAEEALR	1	5	1	F8VQJ3		0	0	0.04872	2.39549	2	860.447	-0.518751	11.0034	0
	High	AFDITYVR	1	3	1	F8VQJ3		0	0	0.076	2.27476	2	984.514	-1.24105	16.5351	0
	High	TKEVVcTHcPTGTAGKR	1	2	1	F8VQJ3	C6(Carbamidomethyl); C9(Carbamidomethyl)	0	0	0.07195	2.18392	4	1901.93	-0.363898	11.6787	2
	High	LKEAEREVTDLLR	1	3	1	F8VQJ3		0	0	0.02955	2.14179	3	1571.87	-1.60095	18.3925	2
	High	DVDQNLMDR	1	4	1	F8VQJ3		0	0	0.08558	2.07644	2	1105.49	-1.21555	12.9103	0
	High	EAEREVTDLLR	1	3	1	F8VQJ3		0	0	0.06441	1.88747	3	1330.7	-0.153137	15.8286	1
	High	DIAEIIK	1	6	1	F8VQJ3		0	0	0.08034	1.84294	2	801.472	-0.107408	15.6757	0
	High	ETPSLGPYSPcVLcTcnGHSETcDPETGVcDcRDnTAGPHcEK	1	3	1	F8VQJ3	C11(Carbamidomethyl); C14(Carbamidomethyl); C16(Carbamidomethyl); N17(Deamidated); C23(Carbamidomethyl); C30(Carbamidomethyl); C32(Carbamidomethyl); N35(Deamidated); C41(Carbamidomethyl)	0	0.001	0.1047	3.74721	5	4926.97	5.18996	17.9156	1
	High	SQEcYFDPELYR	1	3	1	F8VQJ3	C4(Carbamidomethyl)	0	0.001	0.132	3.38331	2	1606.68	-0.926408	17.9656	0
	High	cKEGFFGNPLAPNPADKcK	1	2	1	F8VQJ3	C1(Carbamidomethyl); C18(Carbamidomethyl)	0	0.001	0.1161	3.31118	3	2150.01	-3.6179	18.202	2
	High	cSDGYYGDSTLGTSSDcQPcPcPGGSScAIVPK	1	3	1	F8VQJ3	C1(Carbamidomethyl); C17(Carbamidomethyl); C20(Carbamidomethyl); C22(Carbamidomethyl); C28(Carbamidomethyl)	0	0.001	0.08726	3.27268	3	3540.41	-0.885993	16.0173	0
	High	DIHNLEDIKK	2	6	1	F8VQJ3		0	0.001	0.1285	3.12531	3	1224.66	-0.600079	12.8489	1
	High	LKDYEDLR	1	6	1	F8VQJ3		0	0.001	0.1516	2.70272	2	1051.54	-0.439227	12.5095	1
	High	DVDQNLmDR	1	4	1	F8VQJ3	M7(Oxidation)	0	0.001	0.1216	2.55287	2	1121.49	-0.364845	11.1305	0
	High	QLEEAENELK	1	6	1	F8VQJ3		0	0.001	0.1252	2.51906	2	1202.59	-0.379317	12.1458	0
	High	STLQEANDILNNLKDFDRR	1	4	1	F8VQJ3		0	0.001	0.1048	2.26911	4	2262.15	-0.12637	23.6328	2
	High	LKFHTSRPESFAIYK	1	5	1	F8VQJ3		0	0.001	0.1686	1.96091	4	1823.98	0.0143015	21.3185	1
	High	TAAEEALRR	1	5	1	F8VQJ3		0	0.002	0.2035	1.65387	2	1016.55	-2.70567	11.0675	1
	High	YFIAPVK	1	3	1	F8VQJ3		0	0.004	0.2177	1.82141	2	837.488	0.794193	14.9154	0
	High	cETNHFGFGPEGcKPcDcHHEGSLSLQcK	1	2	1	F8VQJ3	C1(Carbamidomethyl); C13(Carbamidomethyl); C16(Carbamidomethyl); C18(Carbamidomethyl); C28(Carbamidomethyl)	0	0.006	0.2246	2.40411	5	3448.39	-2.81812	19.3478	0
Q5SX39	Myosin-4 OS=Mus musculus GN=Myh4 PE=1 SV=1 - [MYH4_MOUSE]	328.624	48.43	19	27	80	100	1939	222.72	5.74463
	A2	Sequence	# PSMs	# Proteins	# Protein Groups	Protein Group Accessions	Modifications	ΔCn	q-Value	PEP	XCorr	Charge	MH+ [Da]	ΔM [ppm]	RT [min]	# Missed Cleavages
	High	ELEEISERLEEAGGATSAQIEmNK	1	5	3	B2RWX0;Q5SX39;G3UW82	M22(Oxidation)	0	0	0.0001735	6.56944	3	2650.25	-1.61186	18.3803	1
	High	ALQEAHQQTLDDLQAEEDKVNTLTK	2	7	3	B2RWX0;Q5SX39;G3UW82		0	0	0.0001302	6.5547	3	2838.41	-0.872834	18.3831	1
	High	GQTVQQVYNSVGALAK	1	5	2	B2RWX0;Q5SX39		0	0	0.000637	6.05414	2	1662.88	-0.582615	17.7864	0
	High	TLAFLFSGGQAAEAEGGGGK	1	2	1	Q5SX39		0	0	9.142e-05	5.82011	2	1867.92	-1.34807	20.0324	0
	High	LEEAGGATSAQIEmNK	1	5	3	B2RWX0;Q5SX39;G3UW82	M14(Oxidation)	0	0	0.0001061	5.73236	2	1664.78	-0.498629	11.3837	0
	High	TKLEQQVDDLEGSLEQEKK	1	3	1	Q5SX39		0	0	0.0001961	5.50787	3	2217.12	0.0300576	19.1463	2
	High	IKELTERAEDEEEINAELTAK	2	1	1	Q5SX39		0	0	0.001889	5.29363	3	2431.22	0.160317	17.2508	2
	High	mQGTLEDQIISANPLLEAFGNAK	2	9	3	B2RWX0;Q5SX39;G3UW82	M1(Oxidation)	0	0	0.002035	5.26361	3	2476.23	-1.95552	25.2787	0
	High	DLEEATLQHEATAAALR	2	7	1	Q5SX39		0	0	0.0004253	5.24361	2	1838.92	-0.335874	17.2362	0
	High	LQDAEEHVEAVNSK	2	1	1	Q5SX39		0	0	0.001043	5.23997	2	1568.75	-0.38062	11.2113	0
	High	NDLQLQVQAEADGLADAEER	1	1	1	Q5SX39		0	0	0.0005402	5.15073	2	2185.03	-1.20548	19.2641	0
	High	KALQEAHQQTLDDLQAEEDKVNTLTK	1	7	3	B2RWX0;Q5SX39;G3UW82		0	0	0.00113	4.89782	4	2966.49	-4.41947	19.8214	2
	High	IEDEQALGMQLQK	1	3	2	B2RWX0;Q5SX39		0	0	0.0009324	4.87652	2	1502.75	-1.38132	15.3221	0
	High	NLQQEISDLTEQIAEGGK	2	8	3	B2RWX0;Q5SX39;G3UW82		0	0	0.0005481	4.85492	3	1972.98	0.645398	24.6348	0
	High	LQNEVEDLmIDVER	1	8	3	B2RWX0;Q5SX39;G3UW82	M9(Oxidation)	0	0	0.003114	4.69663	2	1718.82	-1.02372	18.102	0
	High	QAEEAEEQSNVNLAK	1	7	2	B2RWX0;Q5SX39		0	0	0.001252	4.69159	2	1659.78	-0.196062	11.3047	0
	High	VRELENEVENEQKR	1	3	1	Q5SX39		0	0	0.002097	4.67947	3	1771.89	-0.06639	12.3574	2
	High	VLNASAIPEGQFIDSK	1	8	2	B2RWX0;Q5SX39		0	0	0.001044	4.61328	2	1688.88	-0.600566	17.6118	0
	High	VVESmQSTLDAEIR	1	7	3	B2RWX0;Q5SX39;G3UW82	M5(Oxidation)	0	0	0.002523	4.58937	2	1593.78	-0.439496	13.7338	0
	High	KKLETDISQIQGEmEDIVQEAR	1	7	3	B2RWX0;Q5SX39;G3UW82	M14(Oxidation)	0	0	0.01719	4.5596	3	2576.29	-0.366883	19.3104	2
	High	KLEDEcSELKK	1	15	3	B2RWX0;Q5SX39;G3UW82	C6(Carbamidomethyl)	0	0	0.005786	4.54374	3	1378.69	-0.4853	11.4831	2
	High	IEELEEEIEAER	1	12	3	B2RWX0;Q5SX39;G3UW82		0	0	0.01711	4.46141	2	1488.7	-1.57327	16.4011	0
	High	HADSVAELGEQIDNLQR	1	11	3	B2RWX0;Q5SX39;G3UW82		0	0	0.0005951	4.39671	2	1894.93	0.209796	18.2483	0
	High	AEDEEEINAELTAK	1	8	3	B2RWX0;Q5SX39;G3UW82		0	0	0.005396	4.36127	2	1561.72	-1.35785	14.2898	0
	High	LASADIETYLLEK	1	19	3	B2RWX0;Q5SX39;G3UW82		0	0	0.001722	4.33906	2	1465.78	-0.597506	20.1902	0
	High	VKNAYEESLDQLETLKR	2	2	1	Q5SX39		0	0	0.002792	4.33801	3	2036.06	-1.88324	19.8622	2
	High	IAEKDEEIDQLKR	1	8	3	B2RWX0;Q5SX39;G3UW82		0	0	0.005042	4.27571	3	1586.84	-0.831178	12.8392	2
	High	SELKmEIDDLASNmETVSK	1	1	1	Q5SX39	M5(Oxidation); M14(Oxidation)	0	0	0.00332	4.12728	3	2172	-1.36148	17.1026	1
	High	IEDEQALGmQLQK	1	3	2	B2RWX0;Q5SX39	M9(Oxidation)	0	0	0.004135	4.07722	2	1518.74	-3.16266	13.5285	0
	High	LLGSIDIDHTQYK	3	9	3	B2RWX0;Q5SX39;G3UW82		0	0	0.002269	4.04654	2	1502.78	-0.582974	16.2056	0
	High	NAYEESLDQLETLKR	2	4	2	Q5SX39;G3UW82		0	0	0.003993	3.9505	2	1808.9	-1.03319	18.3106	1
	High	VQLLHTQNTSLINTK	2	9	3	B2RWX0;Q5SX39;G3UW82		0	0	0.004704	3.847	3	1709.95	-0.612281	15.509	0
	High	LQDLVDKLQTK	2	3	1	Q5SX39		0	0	0.03501	3.79769	2	1300.75	-1.24567	14.9454	1
	High	VIQYFATIAVTGDK	1	8	2	Q5SX39;G3UW82		0	0	0.01564	3.75514	2	1525.82	-2.10229	19.283	0
	High	NKDPLNETVVGLYQK	1	17	3	B2RWX0;Q5SX39;G3UW82		0	0	0.02209	3.68487	3	1717.91	0.195198	17.422	1
	High	VAEQELLDASER	1	2	1	Q5SX39		0	0	0.004074	3.55814	2	1359.68	0.52038	14.4025	0
	High	EKSELKmEIDDLASNmETVSK	1	1	1	Q5SX39	M7(Oxidation); M16(Oxidation)	0	0	0.01458	3.51152	3	2429.15	1.34685	18.0231	2
	High	LAQESTmDIENDKQQLDEK	1	3	1	Q5SX39	M7(Oxidation)	0	0	0.07929	3.46785	3	2251.04	-0.122851	12.4789	1
	High	TKYETDAIQR	2	13	3	B2RWX0;Q5SX39;G3UW82		0	0	0.02898	3.39849	3	1224.62	-0.631118	11.2609	1
	High	NLTEEmAGLDENIAK	1	2	1	Q5SX39	M6(Oxidation)	0	0	0.01093	3.37758	2	1663.78	-2.25333	14.6281	0
	High	DIDDLELTLAK	1	17	3	B2RWX0;Q5SX39;G3UW82		0	0	0.01198	3.32523	2	1245.66	-0.641879	19.6952	0
	High	IQHELEEAEERADIAESQVNK	1	10	3	B2RWX0;Q5SX39;G3UW82		0	0	0.005662	3.31846	3	2438.19	2.76891	17.3432	1
	High	KAITDAAmmAEELKK	1	19	3	B2RWX0;Q5SX39;G3UW82	M8(Oxidation); M9(Oxidation)	0	0	0.01312	3.22858	3	1681.85	-0.303144	13.5021	2
	High	AGLLGTLEEmRDEK	2	2	1	Q5SX39	M10(Oxidation)	0	0	0.06123	3.22019	2	1577.79	0.733654	16.5718	1
	High	GSSFQTVSALFR	1	11	3	B2RWX0;Q5SX39;G3UW82		0	0	0.02068	3.21738	2	1299.67	0.380122	20.1932	0
	High	DLEEATLQHEATAAALRK	1	7	1	Q5SX39		0	0	0.01024	3.19278	3	1967.02	-1.43754	17.0685	1
	High	QLDEKDAmVSQLSR	2	1	1	Q5SX39	M8(Oxidation)	0	0	0.01841	3.19072	2	1635.8	0.34896	12.39	1
	High	RVAEQELLDASER	2	2	1	Q5SX39		0	0	0.01978	3.12393	3	1515.77	-0.840683	14.5431	1
	High	cNGVLEGIR	1	35	5	E9QPE7;B2RWX0;Q5SX39;G3UW82;Q8VDD5	C1(Carbamidomethyl)	0	0	0.02807	3.03184	2	1017.51	-0.849906	13.9692	0
	High	LEQQVDDLEGSLEQEKK	1	12	3	B2RWX0;Q5SX39;G3UW82		0	0	0.07861	3.0127	3	1987.98	0.806526	15.5963	1
	High	LDEAEQLALK	1	18	3	B2RWX0;Q5SX39;G3UW82		0	0	0.06526	2.98754	2	1129.61	-1.04377	14.4809	0
	High	ANLmQAEIEELR	1	2	1	Q5SX39	M4(Oxidation)	0	0	0.0328	2.97494	2	1432.71	0.336836	15.7765	0
	High	cnGVLEGIR	1	35	5	E9QPE7;B2RWX0;Q5SX39;G3UW82;Q8VDD5	C1(Carbamidomethyl); N2(Deamidated)	0	0	0.005792	2.96016	2	1018.5	-0.137045	14.6543	0
	High	TPGAmEHELVLHQLR	1	9	3	B2RWX0;Q5SX39;G3UW82	M5(Oxidation)	0	0	0.007001	2.94545	3	1746.9	-0.164544	15.8714	0
	High	VKELTYQTEEDRK	1	11	3	B2RWX0;Q5SX39;G3UW82		0	0	0.01841	2.94505	3	1638.83	-0.740666	12.0682	2
	High	QKYEETQAELEASQK	1	2	1	Q5SX39		0	0	0.008826	2.91161	3	1781.85	-0.892022	11.843	1
	High	VGNEYVTK	1	21	3	B2RWX0;Q5SX39;G3UW82		0	0	0.06924	2.89143	2	909.466	-1.49114	10.7876	0
	High	YKVLNASAIPEGQFIDSK	1	7	2	B2RWX0;Q5SX39		0	0	0.05135	2.84206	3	1980.04	-0.470446	18.2237	1
	High	ANSEVAQWR	1	13	3	B2RWX0;Q5SX39;G3UW82		0	0	0.04404	2.74661	2	1060.52	-0.292375	12.3995	0
	High	QREEQAEPDGTEVADK	1	11	3	B2RWX0;Q5SX39;G3UW82		0	0	0.08462	2.68797	3	1801.82	-1.58702	10.7669	1
	High	KmEGDLNEmEIQLNHANR	1	4	1	Q5SX39	M2(Oxidation); M9(Oxidation)	0	0	0.03367	2.64397	4	2174	-0.612392	13.9831	1
	High	SNAAcAALDKK	2	2	1	Q5SX39	C5(Carbamidomethyl)	0	0	0.05049	2.57596	3	1148.57	-0.412209	10.881	1
	High	mVALmQEK	1	3	2	B2RWX0;Q5SX39	M1(Oxidation); M5(Oxidation)	0	0	0.04382	2.54873	2	981.474	-0.454126	10.8259	0
	High	SYHIFYQImSNK	1	7	2	B2RWX0;Q5SX39	M9(Oxidation)	0	0	0.05276	2.50035	3	1546.73	-1.0074	16.9113	0
	High	LYEQHLGK	1	7	3	B2RWX0;Q5SX39;G3UW82		0	0	0.04482	2.37512	2	987.525	-0.645266	11.2089	0
	High	VKVGNEYVTK	1	20	3	B2RWX0;Q5SX39;G3UW82		0	0	0.05313	2.34189	2	1136.63	-0.0107827	11.5851	1
	High	SAETEKEmANmKEDFEK	1	2	1	Q5SX39	M8(Oxidation); M11(Oxidation)	0	0	0.05792	2.28741	3	2048.88	-0.482962	11.1161	2
	High	mFLWmVTR	1	11	3	B2RWX0;Q5SX39;G3UW82	M1(Oxidation); M5(Oxidation)	0	0	0.06655	2.2728	2	1115.54	-0.816232	18.5024	0
	High	KKHADSVAELGEQIDNLQR	1	11	3	B2RWX0;Q5SX39;G3UW82		0	0	0.0719	2.14265	4	2151.11	-0.791745	22.5133	2
	High	EFEmSNLQSK	1	5	3	B2RWX0;Q5SX39;G3UW82	M4(Oxidation)	0	0	0.06624	2.07462	2	1228.55	-0.435782	11.302	0
	High	TLAFLFSGGQAAEAEGGGGKK	1	2	1	Q5SX39		0	0	0.05498	1.9791	3	1996.01	-0.503474	19.5005	1
	High	LINELSTQK	1	1	1	Q5SX39		0	0.001	0.1406	2.73737	2	1045.59	2.87222	12.275	0
	High	HDcDLLREQYEEEQEAK	1	3	2	B2RWX0;Q5SX39	C3(Carbamidomethyl)	0	0.001	0.09267	2.59735	3	2191.96	-0.188266	14.9269	1
	High	GKQAFTQQIEELKR	1	5	3	B2RWX0;Q5SX39;G3UW82		0	0.001	0.1261	2.46613	4	1675.91	0.0412507	16.6854	2
	High	KKEFEmSNLQSK	1	5	3	B2RWX0;Q5SX39;G3UW82	M6(Oxidation)	0	0.001	0.09222	2.44271	3	1484.74	-0.492023	11.7195	2
	High	LHTESGEFSR	2	1	1	Q5SX39		0	0.001	0.1096	2.35409	3	1162.55	-0.157998	11.3103	0
	High	IQLELNQVK	1	9	3	B2RWX0;Q5SX39;G3UW82		0	0.001	0.08846	2.32775	2	1084.64	-0.539955	15.5603	0
	High	VLNASAIPEGQFIDSKK	1	8	2	B2RWX0;Q5SX39		0	0.001	0.135	2.0573	3	1816.98	-0.800382	16.7899	1
	High	ELEEISER	1	14	3	B2RWX0;Q5SX39;G3UW82		0	0.001	0.1841	1.73565	2	1004.49	-0.832503	11.8257	0
	High	NALAHALQSAR	1	3	1	Q5SX39		0	0.001	0.1164	1.62645	3	1151.63	-0.350073	14.4112	0
	High	LTGAVmHYGNmK	1	11	3	B2RWX0;Q5SX39;G3UW82	M6(Oxidation); M11(Oxidation)	0	0.006	0.228	1.32498	3	1353.63	-1.28458	10.9408	0
	High	ALcYPR	1	10	3	B2RWX0;Q5SX39;G3UW82	C3(Carbamidomethyl)	0	0.008	0.2694	1.54934	2	779.387	-0.478699	11.8518	0
Q8VDD5	Myosin-9 OS=Mus musculus GN=Myh9 PE=1 SV=4 - [MYH9_MOUSE]	318.177	46.68	13	71	81	103	1960	226.232	5.65576
	A2	Sequence	# PSMs	# Proteins	# Protein Groups	Protein Group Accessions	Modifications	ΔCn	q-Value	PEP	XCorr	Charge	MH+ [Da]	ΔM [ppm]	RT [min]	# Missed Cleavages
	High	TQLEELEDELQATEDAK	1	13	2	Q8VDD5;E9QPE7		0	0	0.0005424	6.2987	2	1961.92	-0.961129	20.6366	0
	High	ALEQQVEEmKTqLEELEDELQATEDAK	4	4	1	Q8VDD5	M9(Oxidation); Q12(Deamidated)	0	0	0.01491	6.00539	3	3164.49	7.59049	22.8257	1
	High	LQVELDSVTGLLSQSDSK	2	3	1	Q8VDD5		0	0	0.0006026	5.82754	2	1919	0.07011	21.204	0
	High	SmEAEmIQLQEELAAAER	2	5	1	Q8VDD5	M2(Oxidation); M6(Oxidation)	0	0	0.0003374	5.69293	2	2080.95	-1.51893	18.3862	0
	High	IAQLEEELEEEQGNTELINDR	1	5	1	Q8VDD5		0	0	0.0005219	5.47953	3	2472.17	-1.11549	19.0382	0
	High	mQQNIQELEEQLEEEESAR	1	2	1	Q8VDD5	M1(Oxidation)	0	0	0.001034	5.20841	3	2349.05	-1.14524	19.4497	0
	High	DFSALESQLQDTQELLQEENR	2	3	1	Q8VDD5		0	0	0.0008443	5.20097	3	2493.17	-2.40953	23.5301	0
	High	IIGLDQVAGmSETALPGAFK	2	1	1	Q8VDD5	M10(Oxidation)	0	0	0.0001473	5.167	2	2034.06	-0.210282	20.562	0
	High	LQQLFNHTmFILEQEEYQR	1	12	2	Q8VDD5;E9QPE7	M9(Oxidation)	0	0	0.0003683	5.10579	3	2483.2	-2.3961	20.1089	0
	High	KLEEDQIImEDQNcK	1	2	1	Q8VDD5	M9(Oxidation); C14(Carbamidomethyl)	0	0	0.0003906	5.08785	3	1908.87	-1.12869	13.2024	1
	High	FLSNGHVTIPGqQDKDmFQETmEAmR	3	1	1	Q8VDD5	Q12(Deamidated); M17(Oxidation); M22(Oxidation); M25(Oxidation)	0	0	0.01183	5.06724	4	3059.36	2.12146	16.2112	1
	High	QLLQANPILEAFGNAK	2	8	2	E9QPE7;Q8VDD5		0	0	0.003048	4.99886	2	1726.95	1.01668	22.7081	0
	High	ELETQISELQEDLESER	1	2	1	Q8VDD5		0	0	0.001264	4.98902	2	2047.97	0.432427	20.9778	0
	High	LTEmETmQSQLmAEK	1	2	1	Q8VDD5	M4(Oxidation); M7(Oxidation); M12(Oxidation)	0	0	0.005846	4.9077	2	1817.8	-0.463382	11.2578	0
	High	IAQLEEQLDNETK	1	5	1	Q8VDD5		0	0	0.001636	4.7953	2	1530.76	-0.69501	14.6961	0
	High	VISGVLQLGNIAFK	1	1	1	Q8VDD5		0	0	0.001241	4.72771	2	1458.87	-1.244	21.9837	0
	High	NFINNPLAQADWAAK	1	5	1	Q8VDD5		0	0	0.008171	4.60586	2	1672.84	-0.350165	20.2025	0
	High	LQQELDDLLVDLDHQR	2	3	1	Q8VDD5		0	0	0.002849	4.41775	2	1949.99	0.158098	22.5165	0
	High	HSQAVEELADQLEQTKR	1	2	1	Q8VDD5		0	0	0.001505	4.34846	3	1981.99	-4.45099	18.3558	1
	High	ANLQIDQINTDLNLER	1	5	1	Q8VDD5		0	0	0.0004095	4.33253	2	1869.97	1.71814	19.1163	0
	High	VISGVLQLGNIAFKK	1	1	1	Q8VDD5		0	0	0.006358	4.30558	2	1586.96	-1.29699	20.7866	1
	High	ELEDATETADAmNR	1	5	1	Q8VDD5	M12(Oxidation)	0	0	0.006069	4.26558	2	1581.67	-0.122046	11.2362	0
	High	KVEAQLQELQVK	1	2	1	Q8VDD5		0	0	0.01188	4.1015	2	1412.81	0.53067	14.924	1
	High	NTDQASMPDNTAAQK	1	5	2	Q8VDD5;E9QPE7		0	0	0.002432	4.09243	2	1591.7	-2.09804	10.7514	0
	High	KANLQIDQINTDLNLER	1	5	1	Q8VDD5		0	0	0.003101	4.05571	3	1998.06	0.990667	18.5568	1
	High	KKVEAQLQELQVK	1	2	1	Q8VDD5		0	0	0.01902	3.93516	3	1540.91	0.201016	16.2434	2
	High	VAEFTTNLmEEEEK	1	1	1	Q8VDD5	M9(Oxidation)	0	0	0.009275	3.91928	2	1685.76	-1.11728	14.84	0
	High	HEmPPHIYAITDTAYR	1	4	1	Q8VDD5	M3(Oxidation)	0	0	0.003356	3.84692	3	1930.91	-0.416648	17.4313	0
	High	VEAQLQELQVK	1	2	1	Q8VDD5		0	0	0.01952	3.79621	2	1284.71	-0.937245	14.9944	0
	High	LTEmETmQSQLMAEK	1	2	1	Q8VDD5	M4(Oxidation); M7(Oxidation)	0	0	0.0043	3.77782	2	1801.8	-0.57971	12.6228	0
	High	IRELETQISELQEDLESER	1	2	1	Q8VDD5		0	0	0.01574	3.72055	3	2317.15	0.793808	21.7025	1
	High	KQELEEIcHDLEAR	1	2	1	Q8VDD5	C8(Carbamidomethyl)	0	0	0.02352	3.71103	3	1769.85	0.0880332	17.8047	1
	High	QAQQERDELADEIANSSGK	1	5	1	Q8VDD5		0	0	0.002101	3.64002	3	2088.98	-1.01691	14.5098	1
	High	DFSALESQLQDTQELLQEENRQK	1	3	1	Q8VDD5		0	0	0.006363	3.44838	3	2749.33	-0.18177	22.3715	1
	High	VRTELADKVTK	1	3	1	Q8VDD5		0	0	0.03049	3.36558	3	1259.73	-1.54696	12.0944	2
	High	TLEDEAKTHEAQIQEmR	2	2	1	Q8VDD5	M16(Oxidation)	0	0	0.01964	3.31357	3	2044.96	-0.100752	13.5815	1
	High	ELEDATETADAMNR	1	5	1	Q8VDD5		0	0	0.0281	3.27722	2	1565.67	-0.720231	12.9187	0
	High	QLEEAEEEAQR	1	5	1	Q8VDD5		0	0	0.009197	3.24392	2	1331.61	-1.25473	10.9834	0
	High	NLPIYSEEIVEmYK	1	4	1	Q8VDD5	M12(Oxidation)	0	0	0.01288	3.18223	2	1743.85	0.0547739	19.6399	0
	High	VSHLLGINVTDFTR	2	1	1	Q8VDD5		0	0	0.01665	3.14339	3	1571.85	-0.609961	20.3289	0
	High	ADFcIIHYAGK	1	8	1	Q8VDD5	C4(Carbamidomethyl)	0	0	0.03165	3.09484	2	1294.63	0.196481	16.661	0
	High	VAEFTTNLmEEEEKSK	2	1	1	Q8VDD5	M9(Oxidation)	0	0	0.03291	3.07229	2	1900.88	-1.91455	14.5188	1
	High	KEEELQAALAR	1	5	2	Q8VDD5;E9QPE7		0	0	0.02289	3.05693	2	1257.68	-1.71061	13.7549	1
	High	cNGVLEGIR	1	35	5	E9QPE7;B2RWX0;Q5SX39;G3UW82;Q8VDD5	C1(Carbamidomethyl)	0	0	0.02807	3.03184	2	1017.51	-0.849906	13.9692	0
	High	cnGVLEGIR	1	35	5	E9QPE7;B2RWX0;Q5SX39;G3UW82;Q8VDD5	C1(Carbamidomethyl); N2(Deamidated)	0	0	0.005792	2.96016	2	1018.5	-0.137045	14.6543	0
	High	VEEEEERcQYLQAEK	1	2	1	Q8VDD5	C8(Carbamidomethyl)	0	0	0.01136	2.91505	3	1939.87	-0.504391	12.1187	1
	High	AGVLAHLEEER	2	7	1	Q8VDD5		0	0	0.03789	2.85761	2	1223.64	-1.45901	15.2372	0
	High	ImGIPEDEQmGLLR	1	1	1	Q8VDD5	M2(Oxidation); M10(Oxidation)	0	0	0.01102	2.85508	2	1633.79	0.682706	16.3165	0
	High	NKHEAmITDLEER	1	2	1	Q8VDD5	M6(Oxidation)	0	0	0.04328	2.84602	3	1601.76	-0.833349	14.3074	1
	High	TDLLLEPYNK	1	1	1	Q8VDD5		0	0	0.01638	2.81071	2	1205.64	-0.901581	16.9478	0
	High	NmDPLNDNIATLLHQSSDK	1	1	1	Q8VDD5	M2(Oxidation)	0	0	0.01396	2.72919	3	2142.01	0.461735	19.8151	0
	High	LDPHLVLDQLR	2	8	1	Q8VDD5		0	0	0.006385	2.71627	3	1318.75	0.891189	19.1555	0
	High	ALELDSNLYR	1	1	1	Q8VDD5		0	0	0.01075	2.70339	2	1193.62	-0.805449	16.4644	0
	High	VDYKADEWLmK	1	8	1	Q8VDD5	M10(Oxidation)	0	0	0.03333	2.66843	3	1413.67	-0.630727	15.7316	1
	High	EQADFAIEALAK	1	7	2	Q8VDD5;E9QPE7		0	0	0.06883	2.66626	2	1305.67	-0.713169	18.4855	0
	High	FDQLLAEEK	1	17	2	E9QPE7;Q8VDD5		0	0	0.03668	2.58901	2	1092.56	-0.823104	14.2928	0
	High	ALEQQVEEmKTQLEELEDELQATEDAK	1	4	1	Q8VDD5	M9(Oxidation)	0	0	0.08686	2.58666	3	3163.47	-3.05492	22.7724	1
	High	ITDVIIGFQAccR	1	1	1	Q8VDD5	C11(Carbamidomethyl); C12(Carbamidomethyl)	0	0	0.01835	2.5731	2	1552.76	-0.762517	18.6301	0
	High	TEmEDLmSSKDDVGK	1	4	1	Q8VDD5	M3(Oxidation); M7(Oxidation)	0	0	0.01773	2.3651	3	1716.73	-1.69518	10.79	1
	High	QKHSQAVEELADQLEQTKR	1	2	1	Q8VDD5		0	0	0.06704	2.35821	4	2238.14	-3.06847	20.3474	2
	High	EQLEEEEEAKR	1	2	1	Q8VDD5		0	0	0.05022	2.35244	2	1389.65	-1.37793	10.812	1
	High	cQYLQAEK	1	2	1	Q8VDD5	C1(Carbamidomethyl)	0	0	0.06939	2.307	2	1039.49	0.101269	11.2853	0
	High	DLEGLSQR	1	3	1	Q8VDD5		0	0	0.07946	2.26144	2	917.469	-0.0607885	12.453	0
	High	QIATLHAQVTDmK	2	2	1	Q8VDD5	M12(Oxidation)	0	0	0.07643	2.22614	2	1471.76	0.39128	12.2528	0
	High	IAQLEEQLDNETKER	1	5	1	Q8VDD5		0	0	0.07215	2.22122	3	1815.91	-0.818762	14.8819	1
	High	AKQTLENERGELANEVK	1	3	1	Q8VDD5		0	0	0.02736	1.67799	3	1929	-1.64275	14.4568	2
	High	YEILTPNSIPK	1	1	1	Q8VDD5		0	0.001	0.1351	2.91436	2	1274.7	-0.748086	17.0109	0
	High	HEDELLAK	1	2	1	Q8VDD5		0	0.001	0.1234	2.80551	2	954.488	-0.904659	11.6936	0
	High	QRYEILTPNSIPK	1	1	1	Q8VDD5		0	0.001	0.09346	2.68087	2	1558.86	-0.24073	16.9532	1
	High	KLEGDSTDLSDQIAELQAQIAELK	1	2	1	Q8VDD5		0	0.001	0.1017	2.62383	3	2615.34	0.349426	25.153	1
	High	VIQYLAHVASSHK	1	10	1	Q8VDD5		0	0.001	0.09056	2.61742	3	1452.79	-1.55499	15.4571	0
	High	KFDQLLAEEK	2	17	2	E9QPE7;Q8VDD5		0	0.001	0.1434	2.47672	2	1220.65	0.0638826	14.7596	1
	High	AGKLDPHLVLDQLR	1	8	1	Q8VDD5		0	0.001	0.1084	2.40643	3	1574.9	-1.11117	19.8341	1
	High	TELADKVTK	1	3	1	Q8VDD5		0	0.001	0.104	2.38575	2	1004.56	0.305938	10.9317	1
	High	ASREEILAQAK	1	5	1	Q8VDD5		0	0.001	0.1777	2.26876	2	1215.67	-1.00764	12.086	1
	High	LEVNLQAMK	1	4	1	Q8VDD5		0	0.001	0.0905	2.25062	2	1045.57	-1.4094	15.9903	0
	High	LQEMESAVK	1	5	1	Q8VDD5		0	0.001	0.188	2.04366	2	1034.52	-0.95069	11.5467	0
	High	QAcVLmIK	1	1	1	Q8VDD5	C3(Carbamidomethyl); M6(Oxidation)	0	0.001	0.1212	2.0234	2	978.51	-1.04434	13.678	0
	High	EmEAELEDER	1	5	1	Q8VDD5	M2(Oxidation)	0	0.001	0.08798	1.82121	2	1266.52	-0.262123	11.1438	0
	High	VKPLLNSIRHEDELLAK	1	2	1	Q8VDD5		0	0.002	0.1963	1.45106	4	1975.13	0.548297	21.5131	1
	High	ALEEAMEQK	1	4	1	Q8VDD5		0	0.003	0.2077	2.11472	2	1048.5	-1.42465	11.458	0
	High	AGVLAHLEEERDLK	1	7	1	Q8VDD5		0	0.004	0.2161	2.47738	3	1579.84	-0.865815	17.1149	1
	High	GALALEEK	1	5	1	Q8VDD5		0	0.007	0.2677	2.30338	2	830.461	-1.49605	12.2047	0
	High	ADEWLmK	1	8	1	Q8VDD5	M6(Oxidation)	0	0.007	0.2468	1.94174	2	908.417	-1.10343	13.1023	0
	High	TVGQLYK	1	14	2	E9QPE7;Q8VDD5		0	0.008	0.2739	1.60549	2	808.456	-0.685491	11.615	0
P97927	Laminin subunit alpha-4 OS=Mus musculus GN=Lama4 PE=1 SV=2 - [LAMA4_MOUSE]	285.198	36.51	12	56	56	96	1816	201.692	6.21436
	A2	Sequence	# PSMs	# Proteins	# Protein Groups	Protein Group Accessions	Modifications	ΔCn	q-Value	PEP	XCorr	Charge	MH+ [Da]	ΔM [ppm]	RT [min]	# Missed Cleavages
	High	KcDcSGNSDPNLIFEDcDEITGQcR	1	3	1	P97927	C2(Carbamidomethyl); C4(Carbamidomethyl); C17(Carbamidomethyl); C24(Carbamidomethyl)	0	0	0.001921	5.80905	3	2990.2	-0.0839144	18.0503	1
	High	IPFTDIYIGGAPQEVLQSR	2	2	1	P97927		0	0	3.454e-05	5.77269	2	2104.11	-0.209166	21.6751	0
	High	DFNLLEQTETLGVGYGcPEDSLISR	2	2	1	P97927	C17(Carbamidomethyl)	0	0	0.0004528	5.76278	3	2813.33	-0.696418	24.1175	0
	High	SLFPVVLEQLDDYNAK	3	3	1	P97927		0	0	0.001273	5.57054	2	1850.95	-1.11709	23.9442	0
	High	KDFNLLEQTETLGVGYGcPEDSLISR	1	2	1	P97927	C18(Carbamidomethyl)	0	0	0.001519	5.43979	3	2941.42	-1.86937	22.3939	1
	High	mLYYGENQELGPEEIAEK	2	3	1	P97927	M1(Oxidation)	0	0	0.001117	5.30181	2	2128.97	-0.46033	16.7806	0
	High	MLYYGENQELGPEEIAEK	1	3	1	P97927		0	0	0.002235	4.96993	2	2112.98	0.249301	17.8431	0
	High	IQVSmmFDGQSAVEVHPK	2	3	1	P97927	M5(Oxidation); M6(Oxidation)	0	0	0.0004003	4.84343	3	2034.96	-0.297379	14.6665	0
	High	NLHSSDmnGLVQK	2	4	1	P97927	M7(Oxidation); N8(Deamidated)	0	0	0.03223	4.7919	3	1459.68	-1.06442	11.0508	0
	High	AYFnGQSFIASIQK	4	2	1	P97927	N4(Deamidated)	0	0	0.004291	4.72384	2	1574.78	-0.405099	19.9999	0
	High	KIPFTDIYIGGAPQEVLQSR	2	2	1	P97927		0	0	0.0007574	4.67693	2	2232.2	-2.27492	21.3095	1
	High	ELVDEEADEAQELLSQAENWQR	1	3	1	P97927		0	0	0.0007543	4.61549	3	2602.19	-0.0497775	23.9908	0
	High	KKIPFTDIYIGGAPQEVLQSR	2	2	1	P97927		0	0	0.0001522	4.53312	3	2360.29	-1.53624	22.2928	2
	High	AYFNGQSFIASIQK	1	2	1	P97927		0	0	0.0004158	4.42953	2	1573.8	-0.0905142	19.6646	0
	High	AASYFFDGSSYAVVR	1	2	1	P97927		0	0	0.004622	4.40051	2	1639.77	-1.09056	19.0859	0
	High	LSDLQESINQALDHVR	3	3	1	P97927		0	0	0.003278	4.25488	2	1837.94	-0.922266	21.4114	0
	High	KGmLVEKESmDTIDQATHLVEQAHNmR	1	3	1	P97927	M3(Oxidation); M10(Oxidation); M26(Oxidation)	0	0	0.03626	3.99135	4	3159.48	-1.37416	22.2591	2
	High	LDRDVEVEDFQR	2	2	1	P97927		0	0	0.03243	3.97847	3	1520.73	-0.681222	14.0777	1
	High	RAYFNGQSFIASIQK	1	2	1	P97927		0	0	0.01092	3.96048	3	1729.9	-1.17506	19.4591	1
	High	NLHSSDMnGLVQK	2	4	1	P97927	N8(Deamidated)	0	0	0.009249	3.90449	2	1443.69	-0.150016	12.1713	0
	High	QDPSETSDSGVTLGR	1	2	1	P97927		0	0	0.0002203	3.8843	2	1548.71	-0.722721	12.0032	0
	High	cAPGYYGNPLLIGSTcK	1	3	1	P97927	C1(Carbamidomethyl); C16(Carbamidomethyl)	0	0	0.002977	3.86195	2	1870.88	-1.79554	18.5415	0
	High	ESmDTIDQATHLVEQAHNmR	2	3	1	P97927	M3(Oxidation); M19(Oxidation)	0	0	0.0007291	3.79493	3	2358.04	-1.3868	16.8986	0
	High	IYDAVSGIDTQIIYHKDESDNLLNQAR	2	4	1	P97927		0	0	0.01717	3.72909	3	3091.54	1.21917	20.1122	1
	High	IYDAVSGIDTQIIYHKDESDNLLNqAR	3	4	1	P97927	Q25(Deamidated)	0	0	0.0486	3.65957	3	3092.53	3.46639	20.4555	1
	High	NDNLVYVYNLGmK	1	2	1	P97927	M12(Oxidation)	0	0	0.00314	3.50058	2	1558.76	0.0457909	17.9717	0
	High	IQINNSENTLR	1	3	1	P97927		0	0	0.02667	3.29634	2	1301.68	0.174061	12.4582	0
	High	DESDNLLNQAR	1	4	1	P97927		0	0	0.02319	3.26815	2	1274.6	-0.747135	13.7873	0
	High	RAYFnGQSFIASIQK	3	2	1	P97927	N5(Deamidated)	0	0	0.06986	3.23857	2	1730.88	-0.818163	19.286	1
	High	AHLPLDINFR	2	2	1	P97927		0	0	0.01484	3.13334	3	1195.66	-0.156074	19.2013	0
	High	FcQPcPcPLPHLANFAEScYR	1	3	1	P97927	C2(Carbamidomethyl); C5(Carbamidomethyl); C7(Carbamidomethyl); C19(Carbamidomethyl)	0	0	0.003026	3.12626	3	2624.12	-2.31225	19.7287	0
	High	KIQINNSENTLR	2	3	1	P97927		0	0	0.03689	3.11586	2	1429.78	-0.267928	12.4842	1
	High	NLHSSDMNGLVQK	1	4	1	P97927		0	0	0.06555	3.09168	3	1442.7	-0.492889	12.8631	0
	High	VmSTDKQYHDGLPHFVVTSISDTR	1	2	1	P97927	M2(Oxidation)	0	0	0.03709	3.06748	4	2749.32	-0.626094	21.1489	1
	High	LSERENQYTLR	2	3	1	P97927		0	0	0.05673	3.00189	3	1408.72	-0.975649	12.3731	1
	High	SGLLSVSSGAAAHR	2	3	1	P97927		0	0	0.04074	2.8146	2	1312.7	-1.32197	13.4614	0
	High	cVWDLTDDLR	1	3	1	P97927	C1(Carbamidomethyl)	0	0	0.02409	2.79182	2	1292.59	-1.21498	20.0563	0
	High	LAALSIEESK	1	3	1	P97927		0	0	0.04666	2.57965	2	1060.59	-1.01015	14.2956	0
	High	cLDGYIGDSIR	1	3	1	P97927	C1(Carbamidomethyl)	0	0	0.01679	2.55979	2	1268.59	-0.171608	15.5183	0
	High	cAPGYYGDAR	1	3	1	P97927	C1(Carbamidomethyl)	0	0	0.03472	2.53137	2	1129.47	-0.183546	11.2754	0
	High	DKLAFTQSR	1	2	1	P97927		0	0	0.06764	2.50017	2	1065.57	-0.694969	12.0805	1
	High	ENYVGPNcER	1	3	1	P97927	C8(Carbamidomethyl)	0	0	0.009142	2.4958	2	1237.53	-1.18076	10.9756	0
	High	SLLPDVEGLHEK	2	3	1	P97927		0	0	0.01046	2.43839	2	1336.71	-0.753271	17.0291	0
	High	VFLTVPSLSSTAEEK	1	2	1	P97927		0	0	0.009794	2.33733	2	1607.85	-0.633846	19.0212	0
	High	ADSSNDEAVADTSR	1	3	1	P97927		0	0.001	0.1143	4.27637	2	1437.61	-1.24376	10.687	0
	High	TLSGEcAPcDcNGNSHEcLDGSGFcLHcQR	1	2	1	P97927	C6(Carbamidomethyl); C9(Carbamidomethyl); C11(Carbamidomethyl); C18(Carbamidomethyl); C25(Carbamidomethyl); C28(Carbamidomethyl)	0	0.001	0.1372	4.16158	3	3498.35	1.82597	15.4693	0
	High	KGmLVEKESmDTIDqATHLVEQAHNmR	1	3	1	P97927	M3(Oxidation); M10(Oxidation); Q15(Deamidated); M26(Oxidation)	0	0.001	0.1338	3.32496	4	3160.48	3.83822	22.3239	2
	High	IRELIAQTR	1	3	1	P97927		0	0.001	0.1616	3.27553	2	1099.66	-0.795765	12.6646	1
	High	ISFFDGFEGGFNFR	1	2	1	P97927		0	0.001	0.1501	3.1842	2	1639.75	-1.02721	23.844	0
	High	SRQPFLTHR	1	3	1	P97927		0	0.001	0.1162	2.75902	3	1141.62	-0.382644	12.8518	1
	High	NcAVcNcGGGPcDSVTGEcLEEGFEVPTGcDK	1	3	1	P97927	C2(Carbamidomethyl); C5(Carbamidomethyl); C7(Carbamidomethyl); C12(Carbamidomethyl); C19(Carbamidomethyl); C30(Carbamidomethyl)	0	0.001	0.1518	2.61733	3	3535.36	-0.660789	18.1648	0
	High	GmLVEKESmDTIDQATHLVEQAHNmR	1	3	1	P97927	M2(Oxidation); M9(Oxidation); M25(Oxidation)	0	0.001	0.1546	2.52542	4	3031.39	0.258825	20.649	1
	High	YHEISIIYHNDKK	2	2	1	P97927		0	0.001	0.1722	2.47791	4	1659.85	-0.406057	17.3938	1
	High	DKIQEINSK	1	3	1	P97927		0	0.001	0.1708	2.43114	2	1074.58	-1.57568	10.7643	1
	High	HIYNmDPSK	1	2	1	P97927	M5(Oxidation)	0	0.001	0.186	2.33288	2	1120.51	-1.4193	10.6894	0
	High	DVEVEDFQR	1	2	1	P97927		0	0.001	0.1706	2.20199	2	1136.52	-0.432369	13.8666	0
	High	ADSSNDEAVADTSRR	1	3	1	P97927		0	0.001	0.1184	1.85618	3	1593.71	-0.891015	10.6586	1
	High	YELVVDK	1	2	1	P97927		0	0.001	0.1778	1.3623	2	865.466	-0.976883	13.3852	0
	High	cDAGFFR	1	3	1	P97927	C1(Carbamidomethyl)	0	0.002	0.2026	1.82158	2	872.371	-0.908921	14.3168	0
	High	HIYNMDPSK	1	2	1	P97927		0	0.003	0.2058	2.19593	2	1104.51	-0.738757	11.7709	0
	High	KIQInNSENTLR	2	3	1	P97927	N5(Deamidated)	0	0.004	0.2088	3.04318	2	1430.76	-1.21129	12.813	1
	High	GKFGQVTR	1	2	1	P97927		0	0.004	0.2182	1.92329	2	892.5	-0.393218	11.1193	1
	High	FDIEIR	1	10	1	P97927		0	0.004	0.2119	1.36174	2	792.425	-0.661501	16.3676	0
	High	DFNLLEqTETLGVGYGcPEDSLISR	2	2	1	P97927	Q7(Deamidated); C17(Carbamidomethyl)	0.019	0.005	0.2202	2.5798	3	2814.33	4.24597	24.241	0
	High	LSERENQYTLRK	1	3	1	P97927		0	0.007	0.2654	2.68289	3	1536.81	-0.337854	12.3515	2
	High	QYHDGLPHFVVTSISDTR	1	2	1	P97927		0	0.007	0.2512	2.23224	3	2072.02	0.61142	20.2761	0
Q61292	Laminin subunit beta-2 OS=Mus musculus GN=Lamb2 PE=2 SV=2 - [LAMB2_MOUSE]	262.368	43.25	2	62	63	83	1799	196.451	6.66846
	A2	Sequence	# PSMs	# Proteins	# Protein Groups	Protein Group Accessions	Modifications	ΔCn	q-Value	PEP	XCorr	Charge	MH+ [Da]	ΔM [ppm]	RT [min]	# Missed Cleavages
	High	AQGAAQGAIWGAVVDTQNTEQTLQR	1	1	1	Q61292		0	0	7.872e-05	6.08293	3	2613.3	-0.75557	19.6924	0
	High	DFLSQEGADPDSIEmVATR	2	1	1	Q61292	M15(Oxidation)	0	0	0.0003693	5.91386	3	2096.94	-1.08616	18.7471	0
	High	ELIQNVKDFLSQEGADPDSIEmVATR	1	1	1	Q61292	M22(Oxidation)	0	0	0.0001787	5.69376	3	2921.42	-0.0460096	22.6811	1
	High	AGNSLAASTAEETAGSAQSR	2	1	1	Q61292		0	0	0.0005895	5.36617	3	1878.88	-0.878121	12.0597	0
	High	cGGLGcSGAAATADLALGR	1	1	1	Q61292	C1(Carbamidomethyl); C6(Carbamidomethyl)	0	0	0.0002719	5.24778	2	1777.83	-0.280529	16.8367	0
	High	AGnSLAASTAEETAGSAQSR	1	1	1	Q61292	N3(Deamidated)	0	0	0.0003249	5.18143	2	1879.86	-0.289922	12.4107	0
	High	TcSEcQELYWGDPGLQcR	2	2	1	Q61292	C2(Carbamidomethyl); C5(Carbamidomethyl); C17(Carbamidomethyl)	0	0	0.004768	5.02922	2	2258.93	2.00205	17.8696	0
	High	LTQLEAELTAVQDENFNANHALSGLER	1	2	1	Q61292		0	0	0.009025	4.86976	3	2983.48	1.38436	22.2623	0
	High	LREGQEVEFLVTSLPR	2	2	1	Q61292		0	0	0.01281	4.84831	2	1873.02	-1.04888	21.8495	1
	High	ADEcDTHTGAcLGcR	2	2	1	Q61292	C4(Carbamidomethyl); C11(Carbamidomethyl); C14(Carbamidomethyl)	0	0	0.002797	4.84331	2	1722.66	-1.09421	10.9116	0
	High	QKAETVQAALEEAQR	2	1	1	Q61292		0	0	0.00456	4.37677	3	1671.87	-0.583087	15.3251	1
	High	LQELEGTYEENER	1	1	1	Q61292		0	0	0.004515	4.36305	2	1609.73	-1.2288	13.0635	0
	High	cDSHDDPVLGLVSGQcR	2	2	1	Q61292	C1(Carbamidomethyl); C16(Carbamidomethyl)	0	0	0.003886	4.10221	2	1914.84	-1.87484	17.621	0
	High	GTVPGSSPcDSSSGTcFcK	1	2	1	Q61292	C9(Carbamidomethyl); C16(Carbamidomethyl); C18(Carbamidomethyl)	0	0	0.000726	4.0326	2	1990.79	-0.996344	12.1128	0
	High	QLREQVGDQYQTVR	1	1	1	Q61292		0	0	0.001678	4.00879	3	1719.88	0.154853	12.4018	1
	High	YYYALYELVIR	1	2	1	Q61292		0	0	0.03068	3.81927	2	1465.77	-5.05332	23.5846	0
	High	YSEIEPSTEGEVIYR	2	2	1	Q61292		0	0	0.0005833	3.72859	2	1771.84	-0.684842	15.6327	0
	High	RAEQLLQDAHR	1	1	1	Q61292		0	0	0.0158	3.70863	3	1336.71	-0.691509	12.7192	1
	High	LGmVQAImSAR	1	2	1	Q61292	M3(Oxidation); M8(Oxidation)	0	0	0.01265	3.68284	2	1208.61	-0.26395	12.2678	0
	High	DPAVcRPcDcDPmGSQDGGR	1	2	1	Q61292	C5(Carbamidomethyl); C8(Carbamidomethyl); C10(Carbamidomethyl); M13(Oxidation)	0	0	6.408e-05	3.62644	3	2265.87	-0.973992	10.9375	0
	High	KAEGVLAAQAR	1	1	1	Q61292		0	0	0.01699	3.59328	2	1113.64	-1.0337	11.4121	1
	High	cEAcAPGHFGDPSKPGGR	1	2	1	Q61292	C1(Carbamidomethyl); C4(Carbamidomethyl)	0	0	0.00662	3.57251	3	1899.82	0.14201	11.9825	0
	High	cQLcEcSGNIDPmDPDAcDPHTGQcLR	1	2	1	Q61292	C1(Carbamidomethyl); C4(Carbamidomethyl); C6(Carbamidomethyl); M13(Oxidation); C18(Carbamidomethyl); C25(Carbamidomethyl)	0	0	0.002179	3.54769	3	3222.25	-0.393959	14.0595	0
	High	TFRPAAmLVER	1	2	1	Q61292	M7(Oxidation)	0	0	0.0037	3.53788	3	1306.69	-0.628741	14.6132	0
	High	RAGNSLAASTAEETAGSAQSR	1	1	1	Q61292		0	0	0.004159	3.52401	3	2034.98	-0.74328	12.0062	1
	High	SLADVDTILAHTmGDVR	2	1	1	Q61292	M13(Oxidation)	0	0	0.004769	3.47348	2	1829.91	-0.327368	19.398	0
	High	AETVQAALEEAQR	1	1	1	Q61292		0	0	0.01842	3.45174	2	1415.71	0.259179	15.5245	0
	High	YFSYDcGADFPGIPLAPPR	2	2	1	Q61292	C6(Carbamidomethyl)	0	0	0.04686	3.41636	3	2142.99	-0.298727	22.0597	0
	High	GPTcNEFTGQcHcHAGFGGR	2	2	1	Q61292	C4(Carbamidomethyl); C11(Carbamidomethyl); C13(Carbamidomethyl)	0	0	0.003518	3.39348	3	2249.9	-0.857619	13.7608	0
	High	GQVEQANQELR	1	1	1	Q61292		0	0	0.05602	3.37359	2	1271.63	-1.21063	10.9781	0
	High	LGmVQAIMSAR	1	2	1	Q61292	M3(Oxidation)	0	0	0.01285	3.27802	2	1192.62	-1.46057	15.1592	0
	High	GScYPATGDLLVGR	1	2	1	Q61292	C3(Carbamidomethyl)	0	0	0.02437	3.27216	2	1465.71	-1.22094	16.5441	0
	High	VLDISIPASPEQIQR	2	1	1	Q61292		0	0	0.04353	3.23965	2	1665.92	-0.250748	18.7875	0
	High	AmDYDLLLR	1	2	1	Q61292	M2(Oxidation)	0	0	0.05592	3.22843	2	1125.56	-0.0779039	17.9104	0
	High	HSNFLGAYDSIR	2	2	1	Q61292		0	0	0.01704	3.21073	2	1379.67	-0.137537	17.1542	0
	High	ALVEGGGILSR	1	1	1	Q61292		0	0	0.01569	3.08496	2	1071.62	0.131601	15.3484	0
	High	DLLQAAQDKLQR	2	1	1	Q61292		0	0	0.01473	3.07202	2	1398.77	-0.665394	16.6704	1
	High	AEQLLQDAHR	2	1	1	Q61292		0	0	0.03072	3.04067	2	1180.61	-0.603528	11.8961	0
	High	AAQLDGLEAR	1	1	1	Q61292		0	0	0.0243	3.01758	2	1043.55	-0.740254	12.8276	0
	High	TEVLMGAQK	1	1	1	Q61292		0	0	0.03535	2.99101	2	976.513	-0.645623	11.9135	0
	High	IQGmLHPNTR	2	2	1	Q61292	M4(Oxidation)	0	0	0.007957	2.98164	2	1182.6	-1.19664	10.7987	0
	High	AMDYDLLLR	1	2	1	Q61292		0	0	0.02616	2.89452	2	1109.57	-0.591298	19.6676	0
	High	QHLANQQALGR	1	1	1	Q61292		0	0	0.01225	2.88247	3	1235.66	-0.582439	11.1079	0
	High	IQNVVTSFAPQR	1	2	1	Q61292		0	0	0.0274	2.81856	2	1359.74	0.07605	15.7504	0
	High	LVEATEGLR	1	2	1	Q61292		0	0	0.06423	2.732	2	987.546	-0.934836	12.3221	0
	High	TEVLmGAQK	1	1	1	Q61292	M5(Oxidation)	0	0	0.05536	2.70062	2	992.507	-0.738984	10.8473	0
	High	AEGVLAAQAR	1	1	1	Q61292		0	0	0.02758	2.68775	2	985.542	-0.79718	11.4889	0
	High	LPYGGQcRPcPcPEGPGSQR	1	2	1	Q61292	C7(Carbamidomethyl); C10(Carbamidomethyl); C12(Carbamidomethyl)	0	0	0.002635	2.65343	3	2273	-2.17663	12.3634	0
	High	ETPSWTGPGFVR	1	2	1	Q61292		0	0	0.02993	2.57122	2	1333.65	-0.259032	17.2222	0
	High	DLLQAAQDK	1	1	1	Q61292		0	0	0.07665	2.55625	2	1001.53	-0.933722	13.3828	0
	High	cFLcDSR	1	9	2	Q61292;P02469	C1(Carbamidomethyl); C4(Carbamidomethyl)	0	0	0.031	2.29784	2	957.392	-0.0941503	12.2319	0
	High	VLDPAIPIPDPYSSR	1	2	1	Q61292		0	0	0.02993	2.2902	2	1639.87	-1.41748	19.7753	0
	High	RWDDVVcESR	1	2	1	Q61292	C7(Carbamidomethyl)	0	0.001	0.1114	3.13289	2	1321.59	-1.87818	13.7278	1
	High	EQVGDQYQTVR	1	1	1	Q61292		0	0.001	0.1231	2.65162	2	1322.63	-0.530156	11.3504	0
	High	LTASSTcGLHSPQPYcIVSHLQDEKK	1	2	1	Q61292	C7(Carbamidomethyl); C16(Carbamidomethyl)	0	0.001	0.1683	2.52253	5	2956.43	0.419058	19.2945	1
	High	LHTLGDNLLDPR	1	2	1	Q61292		0	0.001	0.1066	2.50345	3	1363.73	-0.483156	17.0408	0
	High	LQELEGTYEENERALEGK	1	1	1	Q61292		0	0.001	0.127	2.38495	3	2108.01	-2.69031	15.7641	1
	High	QLDALLEALK	1	1	1	Q61292		0	0.001	0.1831	2.38317	2	1113.65	-2.0148	21.3282	0
	High	QLDQHLEILK	1	2	1	Q61292		0	0.001	0.1562	2.29611	3	1236.69	-0.0291376	15.8081	0
	High	LASEIAER	1	1	1	Q61292		0	0.001	0.1188	2.25938	2	888.478	-0.146483	11.2018	0
	High	GQWGFPNcRPcVcNGR	1	2	1	Q61292	C8(Carbamidomethyl); C11(Carbamidomethyl); C13(Carbamidomethyl)	0	0.001	0.1842	1.7929	3	1964.85	1.25842	15.8651	0
	High	cTcNLLGTDPR	1	2	1	Q61292	C1(Carbamidomethyl); C3(Carbamidomethyl)	0	0.004	0.2108	2.61005	2	1306.59	-0.709971	13.5463	0
	High	ELIQNVK	1	1	1	Q61292		0	0.004	0.2186	1.4597	2	843.493	-0.319669	11.7769	0
	High	DGFFGLSASDPR	1	2	1	Q61292		0	0.006	0.2224	2.62146	2	1268.59	-0.0295835	19.036	0
	High	VVQDLAAR	1	2	1	Q61292		0	0.006	0.2392	2.45114	2	871.499	-0.23414	11.1809	0
	High	SLADVDTILAHTmGDVRR	1	1	1	Q61292	M13(Oxidation)	0	0.006	0.232	1.84927	3	1986	-1.34564	19.6177	1
	High	STGHcScRPGVSGVR	1	2	1	Q61292	C5(Carbamidomethyl); C7(Carbamidomethyl)	0	0.008	0.2796	1.74801	4	1616.74	0.0560299	11.3355	0
B2RWX0	Myosin, heavy polypeptide 1, skeletal muscle, adult OS=Mus musculus GN=Myh1 PE=2 SV=1 - [B2RWX0_MOUSE]	244.658	37.8	16	4	61	72	1942	223.208	5.78271
	A2	Sequence	# PSMs	# Proteins	# Protein Groups	Protein Group Accessions	Modifications	ΔCn	q-Value	PEP	XCorr	Charge	MH+ [Da]	ΔM [ppm]	RT [min]	# Missed Cleavages
	High	ELEEISERLEEAGGATSAQIEmNK	1	5	3	B2RWX0;Q5SX39;G3UW82	M22(Oxidation)	0	0	0.0001735	6.56944	3	2650.25	-1.61186	18.3803	1
	High	ALQEAHQQTLDDLQAEEDKVNTLTK	2	7	3	B2RWX0;Q5SX39;G3UW82		0	0	0.0001302	6.5547	3	2838.41	-0.872834	18.3831	1
	High	GQTVQQVYNSVGALAK	1	5	2	B2RWX0;Q5SX39		0	0	0.000637	6.05414	2	1662.88	-0.582615	17.7864	0
	High	LEEAGGATSAQIEmNK	1	5	3	B2RWX0;Q5SX39;G3UW82	M14(Oxidation)	0	0	0.0001061	5.73236	2	1664.78	-0.498629	11.3837	0
	High	mQGTLEDQIISANPLLEAFGNAK	2	9	3	B2RWX0;Q5SX39;G3UW82	M1(Oxidation)	0	0	0.002035	5.26361	3	2476.23	-1.95552	25.2787	0
	High	KALQEAHQQTLDDLQAEEDKVNTLTK	1	7	3	B2RWX0;Q5SX39;G3UW82		0	0	0.00113	4.89782	4	2966.49	-4.41947	19.8214	2
	High	IEDEQALGMQLQK	1	3	2	B2RWX0;Q5SX39		0	0	0.0009324	4.87652	2	1502.75	-1.38132	15.3221	0
	High	NLQQEISDLTEQIAEGGK	2	8	3	B2RWX0;Q5SX39;G3UW82		0	0	0.0005481	4.85492	3	1972.98	0.645398	24.6348	0
	High	NLTEEmAGLDETIAK	1	5	2	B2RWX0;G3UW82	M6(Oxidation)	0	0	0.003888	4.73969	2	1650.79	-1.15536	15.4932	0
	High	LQNEVEDLmIDVER	1	8	3	B2RWX0;Q5SX39;G3UW82	M9(Oxidation)	0	0	0.003114	4.69663	2	1718.82	-1.02372	18.102	0
	High	QAEEAEEQSNVNLAK	1	7	2	B2RWX0;Q5SX39		0	0	0.001252	4.69159	2	1659.78	-0.196062	11.3047	0
	High	VLNASAIPEGQFIDSK	1	8	2	B2RWX0;Q5SX39		0	0	0.001044	4.61328	2	1688.88	-0.600566	17.6118	0
	High	VVESmQSTLDAEIR	1	7	3	B2RWX0;Q5SX39;G3UW82	M5(Oxidation)	0	0	0.002523	4.58937	2	1593.78	-0.439496	13.7338	0
	High	KKLETDISQIQGEmEDIVQEAR	1	7	3	B2RWX0;Q5SX39;G3UW82	M14(Oxidation)	0	0	0.01719	4.5596	3	2576.29	-0.366883	19.3104	2
	High	KLEDEcSELKK	1	15	3	B2RWX0;Q5SX39;G3UW82	C6(Carbamidomethyl)	0	0	0.005786	4.54374	3	1378.69	-0.4853	11.4831	2
	High	DLEEATLQHEATAATLR	2	5	2	B2RWX0;G3UW82		0	0	0.0001881	4.50799	2	1868.93	-0.0370522	16.8495	0
	High	IEELEEEIEAER	1	12	3	B2RWX0;Q5SX39;G3UW82		0	0	0.01711	4.46141	2	1488.7	-1.57327	16.4011	0
	High	HADSVAELGEQIDNLQR	1	11	3	B2RWX0;Q5SX39;G3UW82		0	0	0.0005951	4.39671	2	1894.93	0.209796	18.2483	0
	High	AEDEEEINAELTAK	1	8	3	B2RWX0;Q5SX39;G3UW82		0	0	0.005396	4.36127	2	1561.72	-1.35785	14.2898	0
	High	IKEVTERAEDEEEINAELTAK	1	7	2	B2RWX0;G3UW82		0	0	0.0009745	4.34231	3	2417.2	-0.0556635	16.5748	2
	High	LASADIETYLLEK	1	19	3	B2RWX0;Q5SX39;G3UW82		0	0	0.001722	4.33906	2	1465.78	-0.597506	20.1902	0
	High	IAEKDEEIDQLKR	1	8	3	B2RWX0;Q5SX39;G3UW82		0	0	0.005042	4.27571	3	1586.84	-0.831178	12.8392	2
	High	IEDEQALGmQLQK	1	3	2	B2RWX0;Q5SX39	M9(Oxidation)	0	0	0.004135	4.07722	2	1518.74	-3.16266	13.5285	0
	High	LLGSIDIDHTQYK	3	9	3	B2RWX0;Q5SX39;G3UW82		0	0	0.002269	4.04654	2	1502.78	-0.582974	16.2056	0
	High	VQLLHTQNTSLINTK	2	9	3	B2RWX0;Q5SX39;G3UW82		0	0	0.004704	3.847	3	1709.95	-0.612281	15.509	0
	High	NKDPLNETVVGLYQK	1	17	3	B2RWX0;Q5SX39;G3UW82		0	0	0.02209	3.68487	3	1717.91	0.195198	17.422	1
	High	TKYETDAIQR	2	13	3	B2RWX0;Q5SX39;G3UW82		0	0	0.02898	3.39849	3	1224.62	-0.631118	11.2609	1
	High	DIDDLELTLAK	1	17	3	B2RWX0;Q5SX39;G3UW82		0	0	0.01198	3.32523	2	1245.66	-0.641879	19.6952	0
	High	IQHELEEAEERADIAESQVNK	1	10	3	B2RWX0;Q5SX39;G3UW82		0	0	0.005662	3.31846	3	2438.19	2.76891	17.3432	1
	High	KIAEQELLDASER	2	7	2	B2RWX0;G3UW82		0	0	0.009073	3.26132	3	1501.78	-2.03314	15.1411	1
	High	LINELTAQR	1	4	1	B2RWX0		0	0	0.04375	3.25283	2	1057.6	-1.55544	13.3878	0
	High	KAITDAAmmAEELKK	1	19	3	B2RWX0;Q5SX39;G3UW82	M8(Oxidation); M9(Oxidation)	0	0	0.01312	3.22858	3	1681.85	-0.303144	13.5021	2
	High	LAQESTmDVENDKQQLDEK	1	2	1	B2RWX0	M7(Oxidation)	0	0	0.01291	3.22495	3	2237.02	-0.358002	11.5673	1
	High	GSSFQTVSALFR	1	11	3	B2RWX0;Q5SX39;G3UW82		0	0	0.02068	3.21738	2	1299.67	0.380122	20.1932	0
	High	QLDEKDSLVSQLSR	1	2	1	B2RWX0		0	0	0.0327	3.17868	3	1617.84	-0.476738	16.1384	1
	High	cNGVLEGIR	1	35	5	E9QPE7;B2RWX0;Q5SX39;G3UW82;Q8VDD5	C1(Carbamidomethyl)	0	0	0.02807	3.03184	2	1017.51	-0.849906	13.9692	0
	High	LEQQVDDLEGSLEQEKK	1	12	3	B2RWX0;Q5SX39;G3UW82		0	0	0.07861	3.0127	3	1987.98	0.806526	15.5963	1
	High	LDEAEQLALK	1	18	3	B2RWX0;Q5SX39;G3UW82		0	0	0.06526	2.98754	2	1129.61	-1.04377	14.4809	0
	High	cnGVLEGIR	1	35	5	E9QPE7;B2RWX0;Q5SX39;G3UW82;Q8VDD5	C1(Carbamidomethyl); N2(Deamidated)	0	0	0.005792	2.96016	2	1018.5	-0.137045	14.6543	0
	High	TPGAmEHELVLHQLR	1	9	3	B2RWX0;Q5SX39;G3UW82	M5(Oxidation)	0	0	0.007001	2.94545	3	1746.9	-0.164544	15.8714	0
	High	VKELTYQTEEDRK	1	11	3	B2RWX0;Q5SX39;G3UW82		0	0	0.01841	2.94505	3	1638.83	-0.740666	12.0682	2
	High	ANLLQAEIEELR	1	7	2	B2RWX0;G3UW82		0	0	0.03605	2.93584	2	1398.76	-1.71298	21.4697	0
	High	VGNEYVTK	1	21	3	B2RWX0;Q5SX39;G3UW82		0	0	0.06924	2.89143	2	909.466	-1.49114	10.7876	0
	High	YKVLNASAIPEGQFIDSK	1	7	2	B2RWX0;Q5SX39		0	0	0.05135	2.84206	3	1980.04	-0.470446	18.2237	1
	High	NLQQEISDLTEQIAEGGKR	1	4	2	B2RWX0;G3UW82		0	0	0.04416	2.81438	3	2129.08	-0.283444	24.0914	1
	High	ANSEVAQWR	1	13	3	B2RWX0;Q5SX39;G3UW82		0	0	0.04404	2.74661	2	1060.52	-0.292375	12.3995	0
	High	QREEQAEPDGTEVADK	1	11	3	B2RWX0;Q5SX39;G3UW82		0	0	0.08462	2.68797	3	1801.82	-1.58702	10.7669	1
	High	mVALmQEK	1	3	2	B2RWX0;Q5SX39	M1(Oxidation); M5(Oxidation)	0	0	0.04382	2.54873	2	981.474	-0.454126	10.8259	0
	High	SYHIFYQImSNK	1	7	2	B2RWX0;Q5SX39	M9(Oxidation)	0	0	0.05276	2.50035	3	1546.73	-1.0074	16.9113	0
	High	LYEQHLGK	1	7	3	B2RWX0;Q5SX39;G3UW82		0	0	0.04482	2.37512	2	987.525	-0.645266	11.2089	0
	High	VKVGNEYVTK	1	20	3	B2RWX0;Q5SX39;G3UW82		0	0	0.05313	2.34189	2	1136.63	-0.0107827	11.5851	1
	High	mFLWmVTR	1	11	3	B2RWX0;Q5SX39;G3UW82	M1(Oxidation); M5(Oxidation)	0	0	0.06655	2.2728	2	1115.54	-0.816232	18.5024	0
	High	TLAYLFSGAAAAAEAESGGGGGKK	1	3	1	B2RWX0		0	0	0.02343	2.15143	3	2184.1	1.30131	20.8678	1
	High	KKHADSVAELGEQIDNLQR	1	11	3	B2RWX0;Q5SX39;G3UW82		0	0	0.0719	2.14265	4	2151.11	-0.791745	22.5133	2
	High	EFEmSNLQSK	1	5	3	B2RWX0;Q5SX39;G3UW82	M4(Oxidation)	0	0	0.06624	2.07462	2	1228.55	-0.435782	11.302	0
	High	HDcDLLREQYEEEQEAK	1	3	2	B2RWX0;Q5SX39	C3(Carbamidomethyl)	0	0.001	0.09267	2.59735	3	2191.96	-0.188266	14.9269	1
	High	GKQAFTQQIEELKR	1	5	3	B2RWX0;Q5SX39;G3UW82		0	0.001	0.1261	2.46613	4	1675.91	0.0412507	16.6854	2
	High	KKEFEmSNLQSK	1	5	3	B2RWX0;Q5SX39;G3UW82	M6(Oxidation)	0	0.001	0.09222	2.44271	3	1484.74	-0.492023	11.7195	2
	High	IQLELNQVK	1	9	3	B2RWX0;Q5SX39;G3UW82		0	0.001	0.08846	2.32775	2	1084.64	-0.539955	15.5603	0
	High	VLNASAIPEGQFIDSKK	1	8	2	B2RWX0;Q5SX39		0	0.001	0.135	2.0573	3	1816.98	-0.800382	16.7899	1
	High	ELEEISER	1	14	3	B2RWX0;Q5SX39;G3UW82		0	0.001	0.1841	1.73565	2	1004.49	-0.832503	11.8257	0
	High	LTGAVmHYGNmK	1	11	3	B2RWX0;Q5SX39;G3UW82	M6(Oxidation); M11(Oxidation)	0	0.006	0.228	1.32498	3	1353.63	-1.28458	10.9408	0
	High	ALcYPR	1	10	3	B2RWX0;Q5SX39;G3UW82	C3(Carbamidomethyl)	0	0.008	0.2694	1.54934	2	779.387	-0.478699	11.8518	0
P02469	Laminin subunit beta-1 OS=Mus musculus GN=Lamb1 PE=1 SV=3 - [LAMB1_MOUSE]	236.874	38.02	11	56	57	72	1786	196.961	4.94482
	A2	Sequence	# PSMs	# Proteins	# Protein Groups	Protein Group Accessions	Modifications	ΔCn	q-Value	PEP	XCorr	Charge	MH+ [Da]	ΔM [ppm]	RT [min]	# Missed Cleavages
	High	ScYQDPVTLQLAcVcDPGYIGSR	2	6	1	P02469	C2(Carbamidomethyl); C13(Carbamidomethyl); C15(Carbamidomethyl)	0	0	9.783e-05	6.27635	3	2659.19	-1.06817	20.3595	0
	High	cDVcKEGFYDLSAEDPYGcK	1	6	1	P02469	C1(Carbamidomethyl); C4(Carbamidomethyl); C19(Carbamidomethyl)	0	0	0.002128	5.72496	3	2412.98	0.497712	17.7048	1
	High	GIETPQcDQSTGQcVcVEGVEGPR	2	6	1	P02469	C7(Carbamidomethyl); C14(Carbamidomethyl); C16(Carbamidomethyl)	0	0	0.0006574	5.34268	3	2663.15	0.235562	14.6692	0
	High	EALEEAEKAQVAAEK	1	7	1	P02469		0	0	0.005279	5.27226	2	1615.82	0.213714	12.7045	1
	High	ATGQcScLPNVIGQNcDR	2	6	1	P02469	C5(Carbamidomethyl); C7(Carbamidomethyl); C16(Carbamidomethyl)	0	0	0.0002259	4.6963	2	2049.89	-0.0259151	14.9089	0
	High	TcSEcQELFWGDPDVEcR	2	6	1	P02469	C2(Carbamidomethyl); C5(Carbamidomethyl); C17(Carbamidomethyl)	0	0	0.003518	4.67714	2	2287.9	-1.62786	19.1224	0
	High	cGNTVPDDDNQVVSLSPGSR	1	4	1	P02469	C1(Carbamidomethyl)	0	0	0.005295	4.5549	2	2116.95	-1.21886	14.5914	0
	High	YFAYDcESSFPGISTGPmK	1	7	1	P02469	C6(Carbamidomethyl); M18(Oxidation)	0	0	0.002461	4.47761	2	2172.92	-0.79097	18.6116	0
	High	DVLSALAEVEQLSK	1	7	1	P02469		0	0	0.006122	4.45663	2	1501.81	-1.09175	24.6986	0
	High	YSDIEPSTEGEVIFR	1	7	1	P02469		0	0	0.00169	4.42195	2	1741.83	-0.87706	17.7894	0
	High	ScAcNPLGTIPGGNPcDSETGYcYcKR	1	6	1	P02469	C2(Carbamidomethyl); C4(Carbamidomethyl); C16(Carbamidomethyl); C23(Carbamidomethyl); C25(Carbamidomethyl)	0	0	8.105e-05	4.37397	3	3094.26	0.759427	16.4129	1
	High	DPYHETLNPDSHLIENVVTTFAPNR	2	7	1	P02469		0	0	0.0009595	4.36603	3	2879.39	-0.527183	23.3023	0
	High	KAAQNSGEAEYIEK	2	7	1	P02469		0	0	0.005371	4.09144	2	1537.75	-0.4139	11.4859	1
	High	EGFYDLSAEDPYGcK	1	6	1	P02469	C14(Carbamidomethyl)	0	0	0.03765	3.99124	2	1750.73	-0.10815	17.9126	0
	High	VNEIKDILAQSPAAEPLK	1	6	1	P02469		0	0	0.005961	3.98102	3	1936.07	-0.42271	19.2281	1
	High	NcEQcKPFYFQHPER	2	6	1	P02469	C2(Carbamidomethyl); C5(Carbamidomethyl)	0	0	0.01221	3.97882	3	2039.88	-0.705018	15.4871	0
	High	AAQNSGEAEYIEK	1	7	1	P02469		0	0	0.01554	3.92229	2	1409.65	-0.971586	11.4092	0
	High	YYYAVYDmVVR	1	7	1	P02469	M8(Oxidation)	0	0	0.01591	3.89342	2	1457.68	-1.04527	17.3876	0
	High	NSDIQGALDSITK	1	6	1	P02469		0	0	0.05715	3.88541	2	1361.69	-0.477513	17.385	0
	High	VETLSQVEVILQQSAADIAR	1	7	1	P02469		0	0	0.004333	3.86179	3	2170.17	-2.3668	25.166	0
	High	ERVETLSQVEVILQQSAADIAR	1	7	1	P02469		0	0	0.004731	3.8255	3	2455.32	0.152571	25.3733	1
	High	AmDFDRDVLSALAEVEQLSK	1	6	1	P02469	M2(Oxidation)	0	0	0.001088	3.81371	3	2253.11	-0.469673	26.9803	1
	High	KVNEIKDILAQSPAAEPLK	2	6	1	P02469		0	0	0.03759	3.7236	3	2064.16	-6.28038	19.9258	2
	High	TFRPAAmLIER	1	7	1	P02469	M7(Oxidation)	0	0	0.008339	3.52886	3	1320.71	-0.77964	15.5658	0
	High	KAELLQNEAK	1	7	1	P02469		0	0	0.02153	3.44206	2	1143.64	-0.732202	11.4375	1
	High	RKAELLQNEAK	1	7	1	P02469		0	0	0.04491	3.34958	3	1299.74	-0.501994	12.5645	2
	High	ESPFKEQQEEQAR	1	6	1	P02469		0	0	0.03253	3.21191	2	1605.75	0.533708	11.2335	1
	High	KVDDIIcDSR	1	7	1	P02469	C7(Carbamidomethyl)	0	0	0.005985	3.12729	2	1220.59	-0.586586	12.5823	1
	High	cLAGYYGDPIIGSGDHcRPcPcPDGPDSGR	1	6	1	P02469	C1(Carbamidomethyl); C17(Carbamidomethyl); C20(Carbamidomethyl); C22(Carbamidomethyl)	0	0	0.00453	3.03828	4	3306.38	-1.58952	17.1727	0
	High	VDDIIcDSR	1	7	1	P02469	C6(Carbamidomethyl)	0	0	0.02866	3.00873	2	1092.5	-0.767741	12.6669	0
	High	DRVEDLmLER	2	6	1	P02469	M7(Oxidation)	0	0	0.05046	2.99076	3	1291.63	-2.82607	13.6237	1
	High	YLEDKAQELVR	1	7	1	P02469		0	0	0.03301	2.98616	2	1363.72	-1.56284	14.0386	1
	High	DRVEDLMLER	2	6	1	P02469		0	0	0.07119	2.95324	2	1275.63	-1.1195	16.2141	1
	High	AELLLEEAKR	2	7	1	P02469		0	0	0.02748	2.94378	2	1171.67	0.0675869	14.732	1
	High	cGGPGcGGLVTVAHSAWQK	1	6	1	P02469	C1(Carbamidomethyl); C6(Carbamidomethyl)	0	0	0.00218	2.80574	3	1941.9	-1.18991	16.3979	0
	High	KVESLIAQK	1	7	1	P02469		0	0	0.05123	2.80148	2	1015.61	-0.660748	12.1372	1
	High	LHTLGDNLLDSR	2	7	1	P02469		0	0	0.04319	2.78845	2	1353.71	0.483746	16.298	0
	High	YFQmSLEAEKR	2	6	1	P02469	M4(Oxidation)	0	0	0.03857	2.76142	2	1417.68	-0.386877	12.6411	1
	High	TLDGELDEKYK	1	7	1	P02469		0	0	0.02427	2.76041	2	1310.65	0.851387	12.9639	1
	High	YVVLPRPVcFEK	2	4	1	P02469	C9(Carbamidomethyl)	0	0	0.04903	2.75373	2	1506.81	0.711192	17.9958	0
	High	ELAEQLEFIK	1	6	1	P02469		0	0	0.03117	2.74311	2	1219.66	-0.82803	18.6507	0
	High	NIGILFEEAEK	1	6	1	P02469		0	0	0.03139	2.71406	2	1262.66	-0.57529	19.4802	0
	High	AVITVQRPGK	1	4	1	P02469		0	0	0.05564	2.69166	2	1068.65	-1.32197	11.743	0
	High	LLDELAGK	1	6	1	P02469		0	0	0.06733	2.6409	2	858.493	-0.652295	14.1017	0
	High	NFLTEDSADLDSIEAVANEVLK	1	7	1	P02469		0	0	0.07231	2.5481	3	2393.17	1.2279	27.3633	0
	High	QNAQDVLLK	1	7	1	P02469		0	0	0.07192	2.38679	2	1028.57	-1.89632	13.1849	0
	High	IEDPYSPR	1	7	1	P02469		0	0	0.04432	2.35354	2	976.473	-0.848448	12.0538	0
	High	cFIcDSR	1	9	2	Q61292;P02469	C1(Carbamidomethyl); C4(Carbamidomethyl)	0	0	0.031	2.29784	2	957.392	-0.0941503	12.2319	0
	High	LQLLEDLER	1	7	1	P02469		0	0	0.03641	2.22139	2	1128.63	0.47947	19.2583	0
	High	TLLAQANSK	1	7	1	P02469		0	0	0.07952	2.20597	2	945.536	-0.889697	11.4015	0
	High	VESLIAQK	1	7	1	P02469		0	0	0.07041	2.09593	2	887.519	-0.550593	12.0833	0
	High	ISGVIGPYR	1	6	1	P02469		0	0.001	0.1013	2.6039	2	961.546	-0.533717	14.0865	0
	High	EKYYYAVYDmVVR	1	7	1	P02469	M10(Oxidation)	0	0.001	0.1727	2.6008	3	1714.81	-0.00465794	17.9686	1
	High	YFAYDcESSFPGISTGPmKK	1	7	1	P02469	C6(Carbamidomethyl); M18(Oxidation)	0	0.001	0.09197	2.5356	3	2301.02	0.547262	17.8854	1
	High	SLLKDISEK	1	8	1	P02469		0	0.001	0.1266	2.28641	2	1032.59	-0.637418	14.4782	1
	High	MAQVEVK	1	6	1	P02469		0	0.001	0.139	2.09305	2	804.428	-0.756179	11.1107	0
	High	cLYHTEGDHcQLcQYGYYGDALR	1	6	1	P02469	C1(Carbamidomethyl); C10(Carbamidomethyl); C13(Carbamidomethyl)	0	0.001	0.1398	2.08725	4	2879.2	-0.487596	18.3377	0
	High	TPMTDVcR	1	4	1	P02469	C7(Carbamidomethyl)	0	0.001	0.115	1.59466	2	979.433	-0.721206	11.2529	0
J3QQ16	Protein Col6a3 OS=Mus musculus GN=Col6a3 PE=4 SV=1 - [J3QQ16_MOUSE]	232.99	29.62	6	61	61	72	2677	288.517	8.52881
	A2	Sequence	# PSMs	# Proteins	# Protein Groups	Protein Group Accessions	Modifications	ΔCn	q-Value	PEP	XCorr	Charge	MH+ [Da]	ΔM [ppm]	RT [min]	# Missed Cleavages
	High	VSVmANTPSGPVEAFDFAEYQPELFEK	1	4	1	J3QQ16	M4(Oxidation)	0	0	0.007674	5.4076	3	3018.41	-0.406154	23.4923	0
	High	VVIHFTDGADGDmADLYR	2	4	1	J3QQ16	M13(Oxidation)	0	0	0.0002844	5.30688	3	2010.92	-0.376518	17.0745	0
	High	SVEDAQDVSLALTQK	2	4	1	J3QQ16		0	0	0.001477	5.21393	2	1603.82	-0.990016	16.1264	0
	High	IEEGVPQFLVLISSGK	2	5	1	J3QQ16		0	0	0.01944	4.77314	3	1715.96	-0.771686	24.6924	0
	High	SDDEVDDSAVELK	1	4	1	J3QQ16		0	0	0.00415	4.71956	2	1421.63	-1.66388	13.3935	0
	High	SALLDSIQNLQVALTSK	1	4	1	J3QQ16		0	0	0.0005321	4.62743	2	1801.01	-0.0632839	23.9218	0
	High	IGDLQSQIVSLLK	1	5	1	J3QQ16		0	0	0.001908	4.62711	2	1413.83	-1.03392	23.0901	0
	High	LSDAGITPLFLTSQEDR	1	4	1	J3QQ16		0	0	0.0004073	4.50576	2	1862.95	-2.36472	20.7592	0
	High	AEQGSGPVSGEKDVVFLIDGSEGVR	1	5	1	J3QQ16		0	0	0.0005074	4.50325	3	2532.25	-1.22755	20.3192	1
	High	IEDNVQQFLVLLVAGR	2	5	1	J3QQ16		0	0	0.001872	4.3626	2	1814.01	-3.10312	27.4721	0
	High	VAVVTYNNEVTTEIR	1	4	1	J3QQ16		0	0	0.007847	4.29895	2	1707.89	-0.83916	15.9098	0
	High	AcNLEVILGFDGSR	1	4	1	J3QQ16	C2(Carbamidomethyl)	0	0	0.002959	4.19788	2	1550.76	-1.57698	21.1648	0
	High	VGLVQYnSDPTDEFFLR	1	5	1	J3QQ16	N7(Deamidated)	0	0	0.002246	4.16494	2	2000.96	-1.31549	21.9746	0
	High	IVEYLDIGFDTTR	1	5	1	J3QQ16		0	0	0.001189	4.15281	2	1541.78	-0.43985	20.6909	0
	High	VGLVQYNSDPTDEFFLR	1	5	1	J3QQ16		0	0	0.02228	4.12638	2	1999.97	-1.00735	21.552	0
	High	QAGAQALILVGLER	1	4	1	J3QQ16		0	0	0.003001	4.12566	2	1438.84	-1.12183	20.772	0
	High	GGPGQPGFEGEQGTR	1	4	1	J3QQ16		0	0	0.004869	4.08006	2	1473.67	-0.73246	11.3554	0
	High	IGVVQFSNDVFPEFYLK	1	5	1	J3QQ16		0	0	0.01538	4.07465	2	2002.03	-1.08214	24.4927	0
	High	GGSQVYIGNALEYVLK	1	5	1	J3QQ16		0	0	0.01286	3.93565	2	1710.91	2.57101	22.7664	0
	High	LDERVPQIAFVITGGK	1	3	1	J3QQ16		0	0	0.01575	3.91261	3	1742.98	0.825118	21.0124	1
	High	IScSGNQLPTVR	1	4	1	J3QQ16	C3(Carbamidomethyl)	0	0	0.01305	3.91012	2	1331.67	-1.21699	12.7977	0
	High	LTLLGGPTPNTGAALEFVLR	1	4	1	J3QQ16		0	0	0.002608	3.90114	2	2040.15	-0.149073	24.3794	0
	High	FASEIVDTVYEDGDSIR	2	4	1	J3QQ16		0	0	0.001703	3.874	3	1915.89	-0.604422	19.5711	0
	High	IIEELDVKPDGTR	2	4	1	J3QQ16		0	0	0.001478	3.76857	2	1484.8	0.656715	14.4081	0
	High	ALNLGYALDYALR	1	5	1	J3QQ16		0	0	0.006468	3.76135	2	1452.78	-0.418613	22.8449	0
	High	DVVFLIDGSEGVR	1	5	1	J3QQ16		0	0	0.00398	3.70856	2	1405.73	-1.49471	20.2571	0
	High	HAQVISSSGIVSLGIGDR	1	5	1	J3QQ16		0	0	0.003344	3.54625	3	1795.97	-0.00649198	18.4932	0
	High	SQRPYVLTADTLK	1	4	1	J3QQ16		0	0	0.006006	3.51541	2	1491.82	1.36063	15.6873	0
	High	GNRGDSVDQcALIQSIR	1	4	1	J3QQ16	C10(Carbamidomethyl)	0	0	0.05165	3.42904	3	1888.93	-1.22669	16.9903	1
	High	VPQIAFVITGGK	1	4	1	J3QQ16		0	0	0.009914	3.39476	2	1229.73	-0.126894	19.6429	0
	High	QQSLETAmSFVAR	1	4	1	J3QQ16	M8(Oxidation)	0	0	0.01885	3.30241	2	1483.72	-0.432553	14.9727	0
	High	IAEGVPQLLIVLTAEPSGDDVR	2	5	1	J3QQ16		0	0	0.01145	3.12432	3	2292.24	-0.513867	25.1409	0
	High	ELGTIQQVISER	1	4	1	J3QQ16		0	0	0.02817	3.0798	2	1372.75	2.01487	17.4843	0
	High	VVESLDVGPDR	1	5	1	J3QQ16		0	0	0.01419	3.06188	2	1185.61	-0.867359	13.514	0
	High	SSDAVAGPASSLK	1	5	1	J3QQ16		0	0	0.02265	3.04536	2	1189.61	1.15677	11.9486	0
	High	VAVIQFSEDSK	1	5	1	J3QQ16		0	0	0.03483	3.0252	2	1222.63	-0.744736	15.2099	0
	High	NAGPEFQYIR	1	5	1	J3QQ16		0	0	0.07409	2.89605	2	1194.59	-0.701691	15.5386	0
	High	ISLSPEYVYSVSTFR	1	5	1	J3QQ16		0	0	0.04994	2.82277	2	1747.89	-1.10997	20.9966	0
	High	VAIAQFSDDVR	1	5	1	J3QQ16		0	0	0.06666	2.82099	2	1220.63	-0.533274	15.8052	0
	High	VIQLNREELSSLKPILTPSTGAGVGSK	1	5	1	J3QQ16		0	0	0.03302	2.77708	4	2794.57	-0.0500442	21.2257	1
	High	VALVQYSDR	1	5	1	J3QQ16		0	0	0.04114	2.75826	2	1050.56	-0.89375	13.1511	0
	High	SQSSVLEAIR	1	5	1	J3QQ16		0	0	0.04391	2.73593	2	1089.59	-1.25068	15.0618	0
	High	IASNSATAFR	1	4	1	J3QQ16		0	0	0.01482	2.63309	2	1037.54	0.510985	11.556	0
	High	FKGGSPLNTGR	1	5	1	J3QQ16		0	0	0.02843	2.57187	2	1133.61	0.545006	11.7991	1
	High	NIDSEEVGK	1	4	1	J3QQ16		0	0	0.03678	2.55837	2	990.473	-0.572554	10.8237	0
	High	TDLQTITNDPR	1	5	1	J3QQ16		0	0	0.02973	2.42663	2	1273.64	-0.0707481	12.961	0
	High	IEDGVPQHLVLFLGGK	1	5	1	J3QQ16		0	0	0.05691	2.41684	2	1721.96	0.196639	21.6541	0
	High	LLTPITTLTSQQIHQILASTR	1	4	1	J3QQ16		0	0	0.01315	2.4163	3	2335.33	-0.943246	24.1465	0
	High	LLVLITGGK	1	5	1	J3QQ16		0	0	0.04178	2.33367	2	913.607	-1.05844	17.5814	0
	High	VGIEHLLR	1	4	1	J3QQ16		0	0	0.05445	2.28863	2	936.563	0.105032	15.7795	0
	High	NANPSELEqIVLSPAFILAAESLPK	1	5	1	J3QQ16	Q9(Deamidated)	0	0.001	0.1471	4.05558	3	2652.43	7.67581	29.0144	0
	High	HTDQEELVK	1	5	1	J3QQ16		0	0.001	0.1057	2.76827	2	1098.54	-0.41823	11.1053	0
	High	IAEGVPQLLIVLTAEPSGDDVRGPSVVLK	2	5	1	J3QQ16		0	0.001	0.09941	2.75777	4	2972.67	1.49833	25.2545	1
	High	EELSSLKPILTPSTGAGVGSK	1	5	1	J3QQ16		0	0.001	0.09031	2.60237	3	2071.12	-2.01519	17.5095	0
	High	QFGVAPLTIAR	1	5	1	J3QQ16		0	0.001	0.1333	2.10128	2	1172.68	-1.39147	17.9988	0
	High	AEILNLVK	1	5	1	J3QQ16		0	0.001	0.1496	1.97597	2	899.556	-0.422029	16.8652	0
	High	GVVPFIFQAK	1	5	1	J3QQ16		0	0.001	0.1082	1.94809	2	1105.64	-1.16995	20.5383	0
	High	DSFQEVLR	1	5	1	J3QQ16		0	0.001	0.1564	1.80493	2	993.5	-0.106464	15.4144	0
	High	DVVFLIDGSR	1	5	1	J3QQ16		0	0.002	0.193	1.56738	2	1120.6	-0.85563	19.3922	0
	High	VIQLnREELSSLKPILTPSTGAGVGSK	2	5	1	J3QQ16	N5(Deamidated)	0	0.005	0.2206	3.0669	3	2795.56	2.72498	21.0865	1
	High	IEEGVPqFLVLISSGKSDDEVDDSAVELK	1	4	1	J3QQ16	Q7(Deamidated)	0	0.006	0.2344	2.19964	3	3119.57	5.90799	24.019	1
	High	SQSSVLEAIRR	1	5	1	J3QQ16		0	0.006	0.2288	1.11616	3	1245.69	-0.529034	14.7505	1
	High	ELPNIEER	1	5	1	J3QQ16		0	0.007	0.2504	1.77861	2	999.51	-1.09379	13.276	0
G3UW82	MCG140437, isoform CRA_d OS=Mus musculus GN=Myh2 PE=4 SV=1 - [G3UW82_MOUSE]	214.749	33.37	12	4	54	65	1942	223.081	5.77002
	A2	Sequence	# PSMs	# Proteins	# Protein Groups	Protein Group Accessions	Modifications	ΔCn	q-Value	PEP	XCorr	Charge	MH+ [Da]	ΔM [ppm]	RT [min]	# Missed Cleavages
	High	ELEEISERLEEAGGATSAQIEmNK	1	5	3	B2RWX0;Q5SX39;G3UW82	M22(Oxidation)	0	0	0.0001735	6.56944	3	2650.25	-1.61186	18.3803	1
	High	ALQEAHQQTLDDLQAEEDKVNTLTK	2	7	3	B2RWX0;Q5SX39;G3UW82		0	0	0.0001302	6.5547	3	2838.41	-0.872834	18.3831	1
	High	LEEAGGATSAQIEmNK	1	5	3	B2RWX0;Q5SX39;G3UW82	M14(Oxidation)	0	0	0.0001061	5.73236	2	1664.78	-0.498629	11.3837	0
	High	mQGTLEDQIISANPLLEAFGNAK	2	9	3	B2RWX0;Q5SX39;G3UW82	M1(Oxidation)	0	0	0.002035	5.26361	3	2476.23	-1.95552	25.2787	0
	High	KALQEAHQQTLDDLQAEEDKVNTLTK	1	7	3	B2RWX0;Q5SX39;G3UW82		0	0	0.00113	4.89782	4	2966.49	-4.41947	19.8214	2
	High	NLQQEISDLTEQIAEGGK	2	8	3	B2RWX0;Q5SX39;G3UW82		0	0	0.0005481	4.85492	3	1972.98	0.645398	24.6348	0
	High	NLTEEmAGLDETIAK	1	5	2	B2RWX0;G3UW82	M6(Oxidation)	0	0	0.003888	4.73969	2	1650.79	-1.15536	15.4932	0
	High	LQNEVEDLmLDVER	1	8	3	B2RWX0;Q5SX39;G3UW82	M9(Oxidation)	0	0	0.003114	4.69663	2	1718.82	-1.02372	18.102	0
	High	VVESmQSTLDAEIR	1	7	3	B2RWX0;Q5SX39;G3UW82	M5(Oxidation)	0	0	0.002523	4.58937	2	1593.78	-0.439496	13.7338	0
	High	KKLETDISQIQGEmEDIVQEAR	1	7	3	B2RWX0;Q5SX39;G3UW82	M14(Oxidation)	0	0	0.01719	4.5596	3	2576.29	-0.366883	19.3104	2
	High	KLEDEcSELKK	1	15	3	B2RWX0;Q5SX39;G3UW82	C6(Carbamidomethyl)	0	0	0.005786	4.54374	3	1378.69	-0.4853	11.4831	2
	High	DLEEATLQHEATAATLR	2	5	2	B2RWX0;G3UW82		0	0	0.0001881	4.50799	2	1868.93	-0.0370522	16.8495	0
	High	IEELEEEIEAER	1	12	3	B2RWX0;Q5SX39;G3UW82		0	0	0.01711	4.46141	2	1488.7	-1.57327	16.4011	0
	High	HADSVAELGEQIDNLQR	1	11	3	B2RWX0;Q5SX39;G3UW82		0	0	0.0005951	4.39671	2	1894.93	0.209796	18.2483	0
	High	AEDEEEINAELTAK	1	8	3	B2RWX0;Q5SX39;G3UW82		0	0	0.005396	4.36127	2	1561.72	-1.35785	14.2898	0
	High	IKEVTERAEDEEEINAELTAK	1	7	2	B2RWX0;G3UW82		0	0	0.0009745	4.34231	3	2417.2	-0.0556635	16.5748	2
	High	LASADIETYLLEK	1	19	3	B2RWX0;Q5SX39;G3UW82		0	0	0.001722	4.33906	2	1465.78	-0.597506	20.1902	0
	High	IAEKDEEIDQLKR	1	8	3	B2RWX0;Q5SX39;G3UW82		0	0	0.005042	4.27571	3	1586.84	-0.831178	12.8392	2
	High	LLGSIDIDHTQYK	3	9	3	B2RWX0;Q5SX39;G3UW82		0	0	0.002269	4.04654	2	1502.78	-0.582974	16.2056	0
	High	NAYEESLDQLETLKR	2	4	2	Q5SX39;G3UW82		0	0	0.003993	3.9505	2	1808.9	-1.03319	18.3106	1
	High	VQLLHTQNTSLINTK	2	9	3	B2RWX0;Q5SX39;G3UW82		0	0	0.004704	3.847	3	1709.95	-0.612281	15.509	0
	High	VIQYFATIAVTGDK	1	8	2	Q5SX39;G3UW82		0	0	0.01564	3.75514	2	1525.82	-2.10229	19.283	0
	High	NKDPLNETVVGLYQK	1	17	3	B2RWX0;Q5SX39;G3UW82		0	0	0.02209	3.68487	3	1717.91	0.195198	17.422	1
	High	TKYETDAIQR	2	13	3	B2RWX0;Q5SX39;G3UW82		0	0	0.02898	3.39849	3	1224.62	-0.631118	11.2609	1
	High	DIDDLELTLAK	1	17	3	B2RWX0;Q5SX39;G3UW82		0	0	0.01198	3.32523	2	1245.66	-0.641879	19.6952	0
	High	IQHELEEAEERADIAESQVNK	1	10	3	B2RWX0;Q5SX39;G3UW82		0	0	0.005662	3.31846	3	2438.19	2.76891	17.3432	1
	High	KIAEQELLDASER	2	7	2	B2RWX0;G3UW82		0	0	0.009073	3.26132	3	1501.78	-2.03314	15.1411	1
	High	LAQESImDIENEKQQLDER	1	2	1	G3UW82	M7(Oxidation)	0	0	0.01718	3.23502	3	2305.09	-1.85126	15.8431	1
	High	KAITDAAmmAEELKK	1	19	3	B2RWX0;Q5SX39;G3UW82	M8(Oxidation); M9(Oxidation)	0	0	0.01312	3.22858	3	1681.85	-0.303144	13.5021	2
	High	GSSFQTVSALFR	1	11	3	B2RWX0;Q5SX39;G3UW82		0	0	0.02068	3.21738	2	1299.67	0.380122	20.1932	0
	High	IEDEQAIGIQLQK	1	2	1	G3UW82		0	0	0.009181	3.15342	2	1484.79	-1.22746	15.7056	0
	High	cNGVLEGIR	1	35	5	E9QPE7;B2RWX0;Q5SX39;G3UW82;Q8VDD5	C1(Carbamidomethyl)	0	0	0.02807	3.03184	2	1017.51	-0.849906	13.9692	0
	High	LEQQVDDLEGSLEQEKK	1	12	3	B2RWX0;Q5SX39;G3UW82		0	0	0.07861	3.0127	3	1987.98	0.806526	15.5963	1
	High	LDEAEQLALK	1	18	3	B2RWX0;Q5SX39;G3UW82		0	0	0.06526	2.98754	2	1129.61	-1.04377	14.4809	0
	High	cnGVLEGIR	1	35	5	E9QPE7;B2RWX0;Q5SX39;G3UW82;Q8VDD5	C1(Carbamidomethyl); N2(Deamidated)	0	0	0.005792	2.96016	2	1018.5	-0.137045	14.6543	0
	High	TPGAmEHELVLHQLR	1	9	3	B2RWX0;Q5SX39;G3UW82	M5(Oxidation)	0	0	0.007001	2.94545	3	1746.9	-0.164544	15.8714	0
	High	VKELTYQTEEDRK	1	11	3	B2RWX0;Q5SX39;G3UW82		0	0	0.01841	2.94505	3	1638.83	-0.740666	12.0682	2
	High	ANLLQAEIEELR	1	7	2	B2RWX0;G3UW82		0	0	0.03605	2.93584	2	1398.76	-1.71298	21.4697	0
	High	VGNEYVTK	1	21	3	B2RWX0;Q5SX39;G3UW82		0	0	0.06924	2.89143	2	909.466	-1.49114	10.7876	0
	High	NLQQEISDLTEQIAEGGKR	1	4	2	B2RWX0;G3UW82		0	0	0.04416	2.81438	3	2129.08	-0.283444	24.0914	1
	High	ANSEVAQWR	1	13	3	B2RWX0;Q5SX39;G3UW82		0	0	0.04404	2.74661	2	1060.52	-0.292375	12.3995	0
	High	QREEQAEPDGTEVADK	1	11	3	B2RWX0;Q5SX39;G3UW82		0	0	0.08462	2.68797	3	1801.82	-1.58702	10.7669	1
	High	LYEQHLGK	1	7	3	B2RWX0;Q5SX39;G3UW82		0	0	0.04482	2.37512	2	987.525	-0.645266	11.2089	0
	High	VKVGNEYVTK	1	20	3	B2RWX0;Q5SX39;G3UW82		0	0	0.05313	2.34189	2	1136.63	-0.0107827	11.5851	1
	High	LINDLTTQR	1	1	1	G3UW82		0	0	0.06918	2.3329	2	1073.59	-0.202254	12.8835	0
	High	LQTESGEFSR	1	2	1	G3UW82		0	0	0.02209	2.33102	2	1153.55	-0.78744	11.4943	0
	High	mFLWmVTR	1	11	3	B2RWX0;Q5SX39;G3UW82	M1(Oxidation); M5(Oxidation)	0	0	0.06655	2.2728	2	1115.54	-0.816232	18.5024	0
	High	KKHADSVAELGEQIDNLQR	1	11	3	B2RWX0;Q5SX39;G3UW82		0	0	0.0719	2.14265	4	2151.11	-0.791745	22.5133	2
	High	EFEmSNLQSK	1	5	3	B2RWX0;Q5SX39;G3UW82	M4(Oxidation)	0	0	0.06624	2.07462	2	1228.55	-0.435782	11.302	0
	High	GKQAFTQQIEELKR	1	5	3	B2RWX0;Q5SX39;G3UW82		0	0.001	0.1261	2.46613	4	1675.91	0.0412507	16.6854	2
	High	KKEFEmSNLQSK	1	5	3	B2RWX0;Q5SX39;G3UW82	M6(Oxidation)	0	0.001	0.09222	2.44271	3	1484.74	-0.492023	11.7195	2
	High	IQLELNQVK	1	9	3	B2RWX0;Q5SX39;G3UW82		0	0.001	0.08846	2.32775	2	1084.64	-0.539955	15.5603	0
	High	ELEEISER	1	14	3	B2RWX0;Q5SX39;G3UW82		0	0.001	0.1841	1.73565	2	1004.49	-0.832503	11.8257	0
	High	LTGAVmHYGNmK	1	11	3	B2RWX0;Q5SX39;G3UW82	M6(Oxidation); M11(Oxidation)	0	0.006	0.228	1.32498	3	1353.63	-1.28458	10.9408	0
	High	ALcYPR	1	10	3	B2RWX0;Q5SX39;G3UW82	C3(Carbamidomethyl)	0	0.008	0.2694	1.54934	2	779.387	-0.478699	11.8518	0
B7FAU9	Filamin, alpha OS=Mus musculus GN=Flna PE=1 SV=1 - [B7FAU9_MOUSE]	202.667	31.56	16	54	58	66	2639	280.325	6.01123
	A2	Sequence	# PSMs	# Proteins	# Protein Groups	Protein Group Accessions	Modifications	ΔCn	q-Value	PEP	XCorr	Charge	MH+ [Da]	ΔM [ppm]	RT [min]	# Missed Cleavages
	High	LQVEPAVDTSGVQcYGPGIEGQGVFR	1	5	1	B7FAU9	C14(Carbamidomethyl)	0	0	0.000179	6.37865	3	2763.34	-1.60944	19.4771	0
	High	FGGEHVPNSPFQVTALAGDQPTVQTPLR	1	6	1	B7FAU9		0	0	0.004049	6.32363	3	2963.5	0.453605	20.581	0
	High	GLVEPVDVVDNADGTQTVNYVPSR	2	5	1	B7FAU9		0	0	0.001333	5.509	2	2544.26	0.714464	18.7106	0
	High	DAGEGLLAVQITDPEGKPK	1	5	1	B7FAU9		0	0	0.0009492	5.13629	2	1938.02	-0.551078	18.1166	0
	High	SPYTVTVGQAcNPAAcR	1	6	1	B7FAU9	C11(Carbamidomethyl); C16(Carbamidomethyl)	0	0	0.001668	5.07572	2	1851.85	-0.788562	13.9744	0
	High	VQVQDNEGcSVEATVK	1	6	1	B7FAU9	C9(Carbamidomethyl)	0	0	0.001125	4.8073	2	1762.83	-0.000557343	12.2982	0
	High	GAGTGGLGLAVEGPSEAK	1	5	1	B7FAU9		0	0	0.001754	4.42147	2	1570.81	-1.20056	15.1887	0
	High	EGSYSISVLYGEEEVPR	1	5	1	B7FAU9		0	0	0.0006505	4.37776	2	1913.91	-0.708888	19.0116	0
	High	FNEEHIPDSPFVVPVASPSGDAR	1	6	1	B7FAU9		0	0	0.006029	4.09677	3	2467.19	1.82526	19.972	0
	High	VTAQGPGLEPSGNIANK	1	6	1	B7FAU9		0	0	0.02152	3.99991	2	1652.86	-0.389967	12.7403	0
	High	VSGLGDKVDVGKDQEFTVK	1	6	1	B7FAU9		0	0	0.01495	3.81027	3	2021.05	-1.13939	15.9541	2
	High	YGGDEIPFSPYR	1	5	1	B7FAU9		0	0	0.01402	3.74885	2	1400.65	-1.7662	17.813	0
	High	IVSPSGAAVPcKVEPGLGADNSVVR	1	6	1	B7FAU9	C11(Carbamidomethyl)	0	0	0.004762	3.72563	3	2479.3	-0.523765	15.9657	1
	High	TGVAVNKPAEFTVDAK	2	5	1	B7FAU9		0	0	0.005035	3.7087	2	1646.87	-0.0594106	14.3851	0
	High	LIALLEVLSQK	1	9	2	B7FAU9;Q80X90		0	0	0.009252	3.68155	2	1226.77	-0.607723	24.004	0
	High	IANLQTDLSDGLR	1	5	1	B7FAU9		0	0	0.00228	3.6562	2	1415.75	-0.518988	17.361	0
	High	AFGPGLQGGNAGSPAR	1	6	1	B7FAU9		0	0	0.02398	3.60043	2	1456.73	-1.05206	12.9875	0
	High	YNDQHIPGSPFTAR	1	5	1	B7FAU9		0	0	0.004895	3.58636	3	1602.77	-0.277157	15.0858	0
	High	SAGQGEVLVYVEDPAGHQEEAK	1	6	1	B7FAU9		0	0	0.007692	3.56612	3	2313.1	0.135877	16.5901	0
	High	ASGPGLNTTGVPASLPVEFTIDAK	2	5	1	B7FAU9		0	0	0.03467	3.44163	2	2342.22	-1.77914	21.498	0
	High	QmQLENVSVALEFLDRESIK	2	6	1	B7FAU9	M2(Oxidation)	0	0	0.0802	3.38663	3	2365.21	1.97686	23.6041	1
	High	VTVLFAGQHIAK	1	6	1	B7FAU9		0	0	0.009551	3.38313	2	1283.75	-0.930162	16.1142	0
	High	ANLPQSFQVDTSK	1	5	1	B7FAU9		0	0	0.003708	3.36957	2	1434.72	-0.632983	14.858	0
	High	EAGAGGLAIAVEGPSK	1	6	1	B7FAU9		0	0	0.01169	3.36579	2	1426.75	-0.699599	15.6056	0
	High	YGGQPVPNFPSK	1	5	1	B7FAU9		0	0	0.01321	3.33665	2	1290.65	-0.668746	14.0507	0
	High	SPFEVYVDKSQGDASK	1	6	1	B7FAU9		0	0	0.01556	3.32428	3	1756.84	-0.411183	15.0313	1
	High	VPVHDVTDASK	2	5	1	B7FAU9		0	0	0.01906	3.29789	2	1167.6	-0.496904	10.8282	0
	High	SPFSVGVSPSLDLSK	1	6	1	B7FAU9		0	0	0.004844	3.23088	2	1519.8	-0.308602	18.9511	0
	High	AYGPGIEPTGNmVK	1	6	1	B7FAU9	M12(Oxidation)	0	0	0.006905	3.0716	2	1449.7	-0.367903	12.6897	0
	High	VATVPQHATSGPGPADVSK	1	6	1	B7FAU9		0	0	0.0002197	3.0359	3	1818.93	-1.20683	11.4177	0
	High	DVDIIDHHDNTYTVK	2	6	1	B7FAU9		0	0	0.03796	2.98791	2	1784.84	-0.617214	14.5976	0
	High	VGSAADIPINISETDLSLLTATVVPPSGR	1	8	1	B7FAU9		0	0	0.0441	2.98633	3	2893.54	-2.8014	26.0928	0
	High	EATTEFSVDAR	1	5	1	B7FAU9		0	0	0.01544	2.96706	2	1225.57	-0.559777	13.1241	0
	High	GTVEPQLEAR	1	6	1	B7FAU9		0	0	0.01123	2.7332	2	1099.57	-0.115519	11.9394	0
	High	AYGPGIEPTGNMVK	1	6	1	B7FAU9		0	0	0.07671	2.69621	2	1433.71	-0.598174	14.5729	0
	High	AWGPGLEGGIVGK	1	5	1	B7FAU9		0	0	0.003933	2.67775	2	1240.67	-0.41506	17.2778	0
	High	AGVAPLQVK	1	5	1	B7FAU9		0	0	0.0485	2.62312	2	882.54	-0.994566	12.8223	0
	High	ALTQTGGPHVK	1	5	1	B7FAU9		0	0	0.04053	2.62064	2	1108.61	-0.414996	10.8333	0
	High	AEVGVPAEFGIWTR	1	4	1	B7FAU9		0	0	0.01505	2.51803	2	1531.79	0.166937	21.1115	0
	High	DAEmPATEKDLAEDAPWKK	1	5	1	B7FAU9	M4(Oxidation)	0	0	0.06286	2.46258	3	2161.01	-0.720592	15.6176	2
	High	cSGPGLSPGmVR	1	5	1	B7FAU9	C1(Carbamidomethyl); M10(Oxidation)	0	0	0.05137	2.45881	2	1233.57	-1.83924	11.9366	0
	High	TGVELGKPTHFTVNAK	2	6	1	B7FAU9		0	0	0.07107	2.45337	3	1698.92	-0.807293	15.5122	0
	High	IVSPSGAAVPcK	1	6	1	B7FAU9	C11(Carbamidomethyl)	0	0	0.02333	2.32686	2	1185.63	-1.02876	11.7513	0
	High	TFSVWYVPEVTGTHK	1	6	1	B7FAU9		0	0	0.07538	2.28688	3	1750.88	0.607864	20.4242	0
	High	AHVAPcFDASK	1	5	1	B7FAU9	C6(Carbamidomethyl)	0	0	0.04372	2.25244	2	1202.56	-0.830232	12.0004	0
	High	AGNNmLLVGVHGPR	1	6	1	B7FAU9	M5(Oxidation)	0	0	0.01964	2.22521	3	1450.76	-1.07269	14.4381	0
	High	VKASGPGLNTTGVPASLPVEFTIDAK	1	5	1	B7FAU9		0	0	0.06357	2.12495	3	2569.39	0.58255	21.389	1
	High	LPQLPITNFSR	1	6	1	B7FAU9		0	0.001	0.1117	2.86477	2	1285.73	-0.748141	19.4977	0
	High	GKLDVQFSGLAK	1	6	1	B7FAU9		0	0.001	0.1368	2.67745	2	1262.71	-0.585229	16.4494	1
	High	AEFTVETR	1	6	1	B7FAU9		0	0.001	0.1661	2.57386	2	952.473	-0.175438	12.4555	0
	High	LSPFmADIR	1	5	1	B7FAU9	M5(Oxidation)	0	0.001	0.1039	2.27414	2	1065.54	-0.424255	15.9931	0
	High	RAEFTVETR	1	6	1	B7FAU9		0	0.001	0.1322	2.23203	2	1108.57	-0.0819166	12.4611	1
	High	LLGWIQNK	1	10	2	B7FAU9;Q80X90		0	0.001	0.1131	2.16503	2	971.567	-0.0133383	17.2101	0
	High	LVSIDSK	1	10	2	B7FAU9;Q80X90		0	0.001	0.1858	1.62868	2	761.44	-0.996147	11.5324	0
	High	IQQNTFTR	1	9	2	B7FAU9;Q80X90		0	0.001	0.09087	1.50109	2	1007.53	-0.725196	11.1902	0
	High	DKGEYTLVVK	1	7	1	B7FAU9		0	0.007	0.2529	2.21428	2	1151.63	0.911894	13.7667	1
	High	TPcEEILVK	1	6	1	B7FAU9	C3(Carbamidomethyl)	0	0.007	0.2487	2.05629	2	1088.56	-1.07901	13.8113	0
	High	FADQHVPGSPFSVK	1	5	1	B7FAU9		0	0.007	0.2506	1.72403	3	1515.76	-0.418126	15.8745	0
	High	VKAEGPGLNR	1	6	1	B7FAU9		0	0.008	0.2734	2.13573	2	1040.58	-1.18934	10.9034	1
Q3UHL6	Putative uncharacterized protein OS=Mus musculus GN=Fn1 PE=2 SV=1 - [Q3UHL6_MOUSE]	192.764	31.81	15	48	48	58	2361	259.966	5.88428
	A2	Sequence	# PSMs	# Proteins	# Protein Groups	Protein Group Accessions	Modifications	ΔCn	q-Value	PEP	XCorr	Charge	MH+ [Da]	ΔM [ppm]	RT [min]	# Missed Cleavages
	High	FGFcPmAAHEEIcTTNEGVmYR	1	9	1	Q3UHL6	C4(Carbamidomethyl); M6(Oxidation); C13(Carbamidomethyl); M20(Oxidation)	0	0	0.0002111	5.88116	3	2652.1	-0.633568	17.1211	0
	High	NTFAEITGLSPGVTYLFK	1	10	1	Q3UHL6		0	0	0.0003549	5.70152	2	1958.02	-1.25002	24.0299	0
	High	QDGHLWcSTTSNYEQDQK	1	9	1	Q3UHL6	C7(Carbamidomethyl)	0	0	0.0006312	5.11814	3	2196.93	1.02735	13.552	0
	High	GVTYNIIVEALQNQR	2	10	1	Q3UHL6		0	0	0.001151	4.72666	3	1717.92	-0.799328	22.1435	0
	High	STATINNIKPGADYTITLYAVTGR	1	10	1	Q3UHL6		0	0	0.0008316	4.59474	3	2540.33	-1.19182	20.702	0
	High	ITYGETGGNSPVQEFTVPGSK	2	10	1	Q3UHL6		0	0	0.01955	4.55611	2	2168.05	-0.161773	17.3024	0
	High	SSPVIIDASTAIDAPSNLR	2	11	1	Q3UHL6		0	0	0.002233	4.55407	2	1927.01	-2.19644	18.7348	0
	High	FLTTTPNSLLVSWQAPR	1	10	1	Q3UHL6		0	0	0.0007818	4.55359	2	1931.04	0.895632	21.9287	0
	High	TYLGNALVcTcYGGSR	1	10	1	Q3UHL6	C9(Carbamidomethyl); C11(Carbamidomethyl)	0	0	0.001197	4.52226	2	1791.81	-2.84128	17.0197	0
	High	EYLGAIcScTcFGGQR	1	11	1	Q3UHL6	C7(Carbamidomethyl); C9(Carbamidomethyl); C11(Carbamidomethyl)	0	0	0.002012	4.46187	2	1878.79	-1.27966	16.7525	0
	High	SYTITGLQPGTDYK	1	11	1	Q3UHL6		0	0	0.001185	4.0973	2	1543.76	-0.355001	15.9005	0
	High	WcGTTQNYDADQK	1	9	1	Q3UHL6	C2(Carbamidomethyl)	0	0	0.004064	3.99841	2	1586.65	-0.119186	11.5437	0
	High	HALQSASAGSGSFTDVR	1	10	1	Q3UHL6		0	0	0.01207	3.99745	3	1690.81	-0.785321	13.1176	0
	High	SDNVPPPTDLQFVELTDVK	2	10	1	Q3UHL6		0	0	0.0123	3.88071	3	2114.06	-1.85274	21.0092	0
	High	TGLDSPTGFDSSDITAnSFTVHWVAPR	1	10	1	Q3UHL6	N17(Deamidated)	0	0	0.007914	3.87395	3	2879.36	5.12787	21.7084	0
	High	LGVRPSQGGEAPR	2	10	1	Q3UHL6		0	0	0.001382	3.74509	3	1323.71	-0.382528	11.0138	0
	High	LTcQcLGFGSGHFR	1	11	1	Q3UHL6	C3(Carbamidomethyl); C5(Carbamidomethyl)	0	0	0.006377	3.70484	3	1639.75	0.633403	16.1354	0
	High	DDKESAPISDTVVPAVPPPTDLR	1	9	1	Q3UHL6		0	0	0.04485	3.66916	3	2419.24	3.16287	18.277	1
	High	DTLTSRPAQGVITTLENVSPPRR	1	10	1	Q3UHL6		0	0	0.06365	3.66311	3	2508.35	0.00365217	19.9317	1
	High	DSmIWDcTcIGAGR	1	10	1	Q3UHL6	M3(Oxidation); C7(Carbamidomethyl); C9(Carbamidomethyl)	0	0	0.01089	3.62725	2	1657.67	-1.47815	16.7648	0
	High	EESPPLIGQQATVSDIPR	1	10	1	Q3UHL6		0	0	0.0006355	3.53679	2	1937	-1.10087	17.1478	0
	High	ATGVFTTLQPLR	1	9	1	Q3UHL6		0	0	0.0175	3.44872	2	1303.74	-0.886627	18.4589	0
	High	ESNPLTAQQTTK	1	10	1	Q3UHL6		0	0	0.01324	3.44451	2	1317.66	-0.319658	11.2995	0
	High	TVLVTWTPPR	1	10	1	Q3UHL6		0	0	0.01553	3.37483	2	1169.67	-0.625403	17.7744	0
	High	VTImWTPPDSVVSGYR	1	10	1	Q3UHL6	M4(Oxidation)	0	0	0.009996	3.29793	2	1823.9	-0.680521	19.5344	0
	High	LRPRPYLPNVDEEVQIGHVPR	2	8	1	Q3UHL6		0	0	0.03015	3.08835	4	2484.33	-6.40568	21.0369	0
	High	VEVLPVSLPGEHGQR	2	10	1	Q3UHL6		0	0	0.01581	3.07163	2	1616.88	0.361766	17.5596	0
	High	NLQPGSEYTVTLVAVK	1	10	1	Q3UHL6		0	0	0.0201	3.06098	2	1718.93	1.22433	18.2987	0
	High	GDSPASSKPVSINYK	1	10	1	Q3UHL6		0	0	0.002342	2.96782	2	1549.79	-0.018822	12.2197	0
	High	YIVNVYQISEEGK	1	10	1	Q3UHL6		0	0	0.07609	2.8778	2	1541.78	-4.78151	17.8283	0
	High	VFAVHQGR	1	10	1	Q3UHL6		0	0	0.05407	2.80687	2	913.5	-0.478168	11.2907	0
	High	YSFcTDHAVLVQTR	1	9	1	Q3UHL6	C4(Carbamidomethyl)	0	0	0.009171	2.67682	3	1696.81	-0.517685	15.8621	0
	High	WSRPQAPITGYR	1	10	1	Q3UHL6		0	0	0.05255	2.65917	3	1431.75	-0.554971	14.6162	0
	High	APITGYIIR	1	10	1	Q3UHL6		0	0	0.01246	2.65606	2	1003.59	-0.707721	16.4313	0
	High	TKTETITGFQVDAIPANGQTPVQR	1	11	1	Q3UHL6		0	0	0.05944	2.55276	3	2572.34	1.83976	17.665	1
	High	TFYScTTEGR	1	9	1	Q3UHL6	C5(Carbamidomethyl)	0	0	0.02541	2.50494	2	1221.52	-0.950122	11.8201	0
	High	IHLYTLNDNAR	2	11	1	Q3UHL6		0	0	0.02869	2.50359	2	1329.69	0.516428	15.3512	0
	High	TFYQIGDSWEK	1	10	1	Q3UHL6		0	0	0.06802	2.45261	2	1373.64	-0.353042	17.693	0
	High	GLTPGVIYEGQLISIQQYGHR	1	9	1	Q3UHL6		0	0	0.0584	2.24493	3	2329.23	-0.0381024	20.775	0
	High	IAWESPQGQVSR	1	8	1	Q3UHL6		0	0.001	0.1169	3.09002	2	1357.68	-2.15095	14.0092	0
	High	GGNSnGALcHFPFLYNNR	1	9	1	Q3UHL6	N5(Deamidated); C9(Carbamidomethyl)	0	0.001	0.1148	2.94257	3	2038.92	1.45019	20.1807	0
	High	FTNIGPDTMR	1	10	1	Q3UHL6		0	0.001	0.1197	2.66899	2	1151.55	-0.841181	14.0121	0
	High	RPGAAEPSPDGTTGHTYNQYTQR	1	11	1	Q3UHL6		0	0.001	0.1789	2.45382	4	2504.16	0.0761826	12.4666	0
	High	VTWAPPPSIELTNLLVR	2	10	1	Q3UHL6		0	0.001	0.1459	2.21175	2	1906.08	0.324522	24.6059	0
	High	STTPDITGYR	1	10	1	Q3UHL6		0	0.001	0.1095	1.97404	2	1110.54	-1.06422	12.7674	0
	High	WLPSTSPVTGYR	1	11	1	Q3UHL6		0	0.001	0.09847	1.7366	2	1363.7	0.243428	16.6178	0
	High	IScTIANR	1	9	1	Q3UHL6	C3(Carbamidomethyl)	0	0.004	0.215	1.9693	2	934.477	-0.838042	10.9638	0
	High	FTNIGPDTmR	1	10	1	Q3UHL6	M9(Oxidation)	0	0.005	0.2193	2.25966	2	1167.54	-1.2838	12.0916	0
	High	QYNVGPLASK	1	10	1	Q3UHL6		0	0.007	0.2478	2.07873	2	1076.57	-0.215047	13.1484	0
Q9JKF1	Ras GTPase-activating-like protein IQGAP1 OS=Mus musculus GN=Iqgap1 PE=1 SV=2 - [IQGA1_MOUSE]	107.788	23.66	21	31	31	34	1657	188.624	6.48096
	A2	Sequence	# PSMs	# Proteins	# Protein Groups	Protein Group Accessions	Modifications	ΔCn	q-Value	PEP	XCorr	Charge	MH+ [Da]	ΔM [ppm]	RT [min]	# Missed Cleavages
	High	ILAIGLINEALDEGDAQK	2	6	1	Q9JKF1		0	0	0.004166	5.68637	2	1883.01	-1.62532	23.4407	0
	High	FALGISAINEAVDSGDVGR	1	5	1	Q9JKF1		0	0	0.0009564	5.54275	2	1890.96	0.927445	21.1521	0
	High	EEIQSSISGVTAAYNR	1	5	1	Q9JKF1		0	0	0.002518	4.87235	2	1724.84	-0.361395	15.7934	0
	High	VDQIQEIVTGNPTVIK	1	6	1	Q9JKF1		0	0	0.01421	4.67247	2	1753.97	-1.45656	18.4192	0
	High	GVLLEIEDLQANQFK	1	7	1	Q9JKF1		0	0	0.005146	4.6646	2	1716.92	0.659891	21.8405	0
	High	SNQQLENDLNLmDIK	1	7	1	Q9JKF1	M12(Oxidation)	0	0	0.005548	4.58178	2	1790.86	-1.11964	17.4157	0
	High	mFLGDNAHLSIINEYLSQSYQK	1	6	1	Q9JKF1	M1(Oxidation)	0	0	0.002476	4.53962	3	2587.24	-2.24356	22.1801	0
	High	LPYDVTPEQALSHEEVK	1	6	1	Q9JKF1		0	0	0.01842	4.22196	3	1954.98	0.0731111	17.2928	0
	High	LAAVAAINAAIQK	1	7	1	Q9JKF1		0	0	0.004561	3.78421	2	1253.76	-0.238868	17.8191	0
	High	TLINAEDPPmIVVR	1	7	1	Q9JKF1	M10(Oxidation)	0	0	0.01176	3.65411	2	1583.85	1.38269	17.4969	0
	High	ATFYGEQVDYYK	1	7	1	Q9JKF1		0	0	0.02584	3.42852	2	1483.67	-0.831861	16.0997	0
	High	EQLWLANEGLITK	1	5	1	Q9JKF1		0	0	0.01478	3.41695	2	1514.82	1.0921	19.9228	0
	High	ALESGDmTTVWK	1	7	1	Q9JKF1	M7(Oxidation)	0	0	0.0485	3.12503	2	1353.63	-0.826876	13.9208	0
	High	YGIQmPAFSK	2	13	1	Q9JKF1	M5(Oxidation)	0	0	0.04887	3.06365	2	1157.56	-5.6243	14.2	0
	High	TLQALQIPAAK	1	6	1	Q9JKF1		0	0	0.04997	2.98596	2	1153.69	-1.03553	16.1027	0
	High	LFQTALQEEIK	1	6	1	Q9JKF1		0	0	0.02841	2.89101	2	1319.72	-0.0717704	17.3639	0
	High	VNVNLLIFLLNK	1	10	1	Q9JKF1		0	0	0.01648	2.74238	2	1399.87	0.104202	26.1193	0
	High	LGNFFSPK	2	9	1	Q9JKF1		0	0	0.03496	2.73967	2	909.483	0.241412	16.1086	0
	High	FQPGETLTEILETPATNEQEAEHQR	1	5	1	Q9JKF1		0	0	0.004003	2.59633	3	2868.36	-1.73128	21.3613	0
	High	LQQTYSALNSK	1	7	1	Q9JKF1		0	0	0.03394	2.54446	2	1252.65	-0.467656	11.8545	0
	High	LTELGTVDPK	1	6	1	Q9JKF1		0	0	0.0312	2.52714	2	1072.59	-0.202189	13.0694	0
	High	YQELINDIAK	1	6	1	Q9JKF1		0	0	0.02782	2.40093	2	1206.64	-0.606242	16.0203	0
	High	ITLQDVVSHSK	1	7	1	Q9JKF1		0	0	0.04286	2.36541	3	1226.67	-0.238147	15.9221	0
	High	LGLAPQIQDLYGK	1	9	1	Q9JKF1		0	0.001	0.08728	2.84771	2	1415.79	-1.03257	19.3167	0
	High	ALQSLALGLR	1	9	1	Q9JKF1		0	0.001	0.09773	2.51685	2	1041.64	-1.20475	17.9378	0
	High	TcLDNLASK	1	5	1	Q9JKF1	C2(Carbamidomethyl)	0	0.001	0.09049	2.45907	2	1021.5	-0.514932	12.2722	0
	High	LIFQmPQNK	1	11	1	Q9JKF1	M5(Oxidation)	0	0.001	0.1264	2.16596	2	1134.59	-2.7466	13.6987	0
	High	IFYPETTDIYDRK	1	9	1	Q9JKF1		0	0.001	0.1732	1.97148	2	1660.82	1.72882	16.4829	1
	High	YLDELmK	1	7	1	Q9JKF1	M6(Oxidation)	0	0.001	0.1432	1.75078	2	927.448	-1.74447	12.8575	0
	High	VNVNLLIFLLNKK	1	10	1	Q9JKF1		0	0.001	0.1289	1.44036	3	1527.96	0.366744	24.8783	1
	High	QLQSDLQQK	1	9	1	Q9JKF1		0	0.006	0.229	1.79397	2	1087.57	-1.10857	10.9611	0
M0QWP1	Agrin OS=Mus musculus GN=Agrn PE=1 SV=1 - [M0QWP1_MOUSE]	84.4691	15.93	9	21	21	22	2034	216.508	6.15088
	A2	Sequence	# PSMs	# Proteins	# Protein Groups	Protein Group Accessions	Modifications	ΔCn	q-Value	PEP	XCorr	Charge	MH+ [Da]	ΔM [ppm]	RT [min]	# Missed Cleavages
	High	GmLcGFGAVcEPSVEDPGR	1	6	1	M0QWP1	M2(Oxidation); C4(Carbamidomethyl); C10(Carbamidomethyl)	0	0	0.0004384	5.62997	2	2053.88	-0.83264	16.8799	0
	High	EAAcQQQVQIEEAR	1	4	1	M0QWP1	C4(Carbamidomethyl)	0	0	0.00981	5.00842	2	1659.77	-1.48599	11.7936	0
	High	VcGSDGVTYGNEcQLK	1	5	1	M0QWP1	C2(Carbamidomethyl); C13(Carbamidomethyl)	0	0	0.0005482	4.97721	2	1786.77	-0.434651	12.6198	0
	High	DQcPETcQFNSVcLSR	1	4	1	M0QWP1	C3(Carbamidomethyl); C7(Carbamidomethyl); C13(Carbamidomethyl)	0	0	0.003247	4.8394	2	2000.82	-0.492062	15.3602	0
	High	LYVGGLPEEQVATVLDR	1	5	1	M0QWP1		0	0	0.0007407	4.83327	2	1858.99	-0.512895	21.1144	0
	High	VVIGGFGDPLIcDNQVSTGDTR	1	4	1	M0QWP1	C12(Carbamidomethyl)	0	0	0.01347	4.78423	2	2320.13	1.54462	20.2539	0
	High	SPVcGSDGVTYSTEcHLK	1	4	1	M0QWP1	C4(Carbamidomethyl); C15(Carbamidomethyl)	0	0	0.0003447	4.75937	3	1996.87	-0.32257	13.1269	0
	High	cEHPPPGPVcGSDGVTYLSAcELR	2	4	1	M0QWP1	C1(Carbamidomethyl); C10(Carbamidomethyl); C21(Carbamidomethyl)	0	0	0.0005178	4.72648	3	2658.18	0.490627	17.734	0
	High	GAAVASGFDGAIQLVSLR	1	6	1	M0QWP1		0	0	0.003886	4.55001	2	1731.94	-1.28076	21.9621	0
	High	GAQcAFGATcTVK	1	4	1	M0QWP1	C4(Carbamidomethyl); C10(Carbamidomethyl)	0	0	0.04124	3.76634	2	1370.62	-0.631517	12.2953	0
	High	HAcANQEHIFK	1	4	1	M0QWP1	C3(Carbamidomethyl)	0	0	0.005098	3.39423	3	1354.63	-0.84172	12.9427	0
	High	GAVRDDcEQmTGLcScRPGVAGPK	1	5	1	M0QWP1	C7(Carbamidomethyl); M10(Oxidation); C14(Carbamidomethyl); C16(Carbamidomethyl)	0	0	0.02234	3.38855	4	2637.16	-1.04539	12.6472	1
	High	QELYVAAQGAcR	1	4	1	M0QWP1	C11(Carbamidomethyl)	0	0	0.02311	3.35384	2	1365.66	-1.52594	12.8546	0
	High	FGSLcEVETGR	1	4	1	M0QWP1	C5(Carbamidomethyl)	0	0	0.01496	3.29489	2	1254.58	-0.161569	14.3973	0
	High	FDTGSGPAVLTSLVPVEPGR	1	5	1	M0QWP1		0	0	0.01011	3.19774	2	1999.05	-0.846472	21.6935	0
	High	LDISIQSLGPcR	1	5	1	M0QWP1	C11(Carbamidomethyl)	0	0	0.02942	3.06115	2	1358.71	-0.240754	18.3653	0
	High	SIESTLDDLFR	1	5	1	M0QWP1		0	0	0.0252	2.88807	2	1295.65	-0.34333	23.7138	0
	High	GIVTDGHSGcTPcScDPR	1	4	1	M0QWP1	C10(Carbamidomethyl); C13(Carbamidomethyl); C15(Carbamidomethyl)	0	0	0.0391	2.80458	3	1975.81	0.176665	11.2391	0
	High	SELFGETAR	1	5	1	M0QWP1		0	0	0.01855	2.30052	2	1009.49	-0.997744	13.4667	0
	High	GALQVGDGPR	1	6	1	M0QWP1		0	0	0.08525	2.26204	2	969.51	-1.45129	11.6532	0
	High	cEPGFWNFR	1	4	1	M0QWP1	C1(Carbamidomethyl)	0	0	0.06404	2.11966	2	1212.52	-1.59843	19.289	0
P19096	Fatty acid synthase OS=Mus musculus GN=Fasn PE=1 SV=2 - [FAS_MOUSE]	74.6833	14.62	4	27	27	27	2504	272.257	6.58057
	A2	Sequence	# PSMs	# Proteins	# Protein Groups	Protein Group Accessions	Modifications	ΔCn	q-Value	PEP	XCorr	Charge	MH+ [Da]	ΔM [ppm]	RT [min]	# Missed Cleavages
	High	SYIITGGLGGFGLELAR	1	3	1	P19096		0	0	0.0004026	4.77885	2	1723.94	-0.660229	23.2409	0
	High	TLEAVQDLLEQGR	1	3	1	P19096		0	0	0.006779	4.25978	2	1471.77	-1.5604	20.1468	0
	High	LGPVGGVFNLAmVLR	1	3	1	P19096	M12(Oxidation)	0	0	0.001753	4.22559	2	1558.88	-1.33589	23.9879	0
	High	AcVDTALENLSTLK	1	3	1	P19096	C2(Carbamidomethyl)	0	0	0.006319	4.00066	2	1534.78	0.185487	18.9073	0
	High	FPQLDDTSFANSR	1	3	1	P19096		0	0	0.005113	3.95077	2	1497.7	-0.95422	17.2275	0
	High	VGDPQELnGITR	1	3	1	P19096	N8(Deamidated)	0	0	0.01886	3.75121	2	1299.65	-1.50976	12.8922	0
	High	LLEASHAFEVSDTGNLIVSGK	1	3	1	P19096		0	0	0.004954	3.68388	3	2187.13	-1.52786	19.0242	0
	High	LLLPEDPLISGLLNSQALK	1	3	1	P19096		0	0	0.01698	3.52797	2	2034.19	0.538419	26.0442	0
	High	FVFTPHmEAEcLSESTALQK	1	3	1	P19096	M7(Oxidation); C11(Carbamidomethyl)	0	0	0.009189	3.23671	3	2341.08	0.138142	17.7924	0
	High	HFQLEQDKPK	1	3	1	P19096		0	0	0.03672	3.0435	3	1269.66	-0.694507	12.7825	0
	High	SFYGTALFLcR	1	3	1	P19096	C10(Carbamidomethyl)	0	0	0.04231	3.00348	2	1334.66	0.88482	20.8962	0
	High	LDPGSPELQQVLK	1	3	1	P19096		0	0	0.03094	2.69792	2	1423.78	0.107583	17.3495	0
	High	VAASVDLITK	1	2	1	P19096		0	0	0.009258	2.41448	2	1016.6	-1.51168	14.46	0
	High	DTSFEQHVLLHTGGK	1	3	1	P19096		0	0	0.01269	2.38229	3	1668.83	-0.909388	15.7025	0
	High	GYTVLGVEGR	1	3	1	P19096		0	0	0.01703	2.3463	2	1050.56	-0.670877	14.8969	0
	High	FDASFFGVHPK	1	3	1	P19096		0	0	0.0277	2.33337	3	1251.61	-0.938529	18.4436	0
	High	DAmLENQTPELFQDVNKPK	1	4	1	P19096	M3(Oxidation)	0	0	0.0838	2.08145	3	2233.08	-0.644648	17.1272	0
	High	DGAWGAFR	1	3	1	P19096		0	0	0.0657	2.01326	2	879.41	-0.921705	15.9425	0
	High	VAEVLAGEGHLYSR	1	3	1	P19096		0	0	0.02373	1.74042	3	1500.78	-0.50773	14.8605	0
	High	VHLTGINVNPNALFPPVEFPAPR	1	3	1	P19096		0	0.001	0.09182	3.62506	3	2499.35	-0.589333	24.0363	0
	High	GVDLVLNSLAEEK	1	3	1	P19096		0	0.001	0.106	3.1045	2	1386.75	-1.5521	19.2222	0
	High	VYLWEDPNSK	1	3	1	P19096		0	0.001	0.1141	2.6298	2	1250.6	-1.1306	16.6456	0
	High	AAmLGQEDPPQHGLPR	1	3	1	P19096	M3(Oxidation)	0	0.001	0.1376	2.03774	3	1732.84	-0.296354	12.4899	0
	High	ALIAEATK	1	3	1	P19096		0	0.001	0.1497	1.91052	2	816.482	-1.12101	11.7568	0
	High	AQVEDAFR	1	3	1	P19096		0	0.001	0.1382	1.87778	2	935.458	-0.319623	12.5413	0
	High	EQTAHAFVNVLTR	1	3	1	P19096		0	0.003	0.208	1.8015	3	1485.78	-0.550104	16.868	0
	High	QAPLLIGSTK	1	3	1	P19096		0	0.007	0.2683	1.76647	2	1027.61	-1.0688	14.492	0
Q61001	Laminin subunit alpha-5 OS=Mus musculus GN=Lama5 PE=1 SV=4 - [LAMA5_MOUSE]	73.2442	9.25	5	23	23	23	3718	403.792	6.72705
	A2	Sequence	# PSMs	# Proteins	# Protein Groups	Protein Group Accessions	Modifications	ΔCn	q-Value	PEP	XCorr	Charge	MH+ [Da]	ΔM [ppm]	RT [min]	# Missed Cleavages
	High	YQAAQQLQTLEQQSISLQQDTER	1	2	1	Q61001		0	0	0.0004111	5.91359	3	2706.34	1.09386	19.738	0
	High	LGSQATGVQGQAGQLLDTTESTLGR	1	1	1	Q61001		0	0	7.644e-05	5.48476	3	2488.26	-0.274711	19.5069	0
	High	KNQLAAQIQEAQAmLAmDTSETSEK	1	1	1	Q61001	M14(Oxidation); M17(Oxidation)	0	0	0.000682	5.2645	3	2768.29	-6.08771	20.9526	1
	High	AVAAEALSTATHVQSQLQGmQK	1	1	1	Q61001	M20(Oxidation)	0	0	5.042e-05	5.14738	3	2285.16	1.90749	17.4	0
	High	DLGAQGAVAEAELAEAQR	1	2	1	Q61001		0	0	7.713e-05	4.89994	2	1798.89	0.0126217	17.7801	0
	High	DLADLAAYTALK	1	2	1	Q61001		0	0	0.002367	3.43753	2	1264.68	-0.972325	20.814	0
	High	GQLQLVEGNFR	1	2	1	Q61001		0	0	0.0349	3.43196	2	1260.67	-0.652455	16.8177	0
	High	ALFSQTSSSVSLR	1	2	1	Q61001		0	0	0.004889	3.4286	2	1382.72	-2.3002	16.0501	0
	High	FmNQEVETQR	1	5	1	Q61001	M2(Oxidation)	0	0	0.02272	3.10332	2	1297.58	-0.495234	10.8606	0
	High	VVLEVASEAGR	1	2	1	Q61001		0	0	0.01575	3.02343	2	1129.62	-3.64572	13.7048	0
	High	VGTFSLDAANPK	1	1	1	Q61001		0	0	0.05223	3.007	2	1219.63	-1.22552	15.0532	0
	High	mGQGSPGDALVPSGEQLR	1	2	1	Q61001	M1(Oxidation)	0	0	0.001006	2.97396	2	1814.87	-1.25562	15.0218	0
	High	DASSSVSTLEK	1	1	1	Q61001		0	0	0.07768	2.9175	2	1123.55	-0.429435	11.5823	0
	High	TTPmLQLQPEEPSR	1	4	1	Q61001	M4(Oxidation)	0	0	0.01475	2.86202	2	1642.81	0.0110626	14.6724	0
	High	AIQVFLLAGNR	1	4	1	Q61001		0	0	0.01082	2.5466	2	1201.71	0.623211	19.9169	0
	High	HPQGTVVFTTQVPTLGR	1	1	1	Q61001		0	0	0.0392	2.48027	3	1837.99	-0.201306	18.1372	0
	High	LELEEAATPEGHAVR	1	1	1	Q61001		0	0	0.03871	2.16273	3	1621.82	-1.0679	13.9596	0
	High	ADPLQPPQALTAASK	1	3	1	Q61001		0	0	0.04822	2.14535	2	1507.81	1.78754	15.8315	0
	High	AGALLPAIR	1	2	1	Q61001		0	0.001	0.1445	2.44058	2	881.556	-0.509652	16.3556	0
	High	GTQDNNLLYYR	1	5	1	Q61001		0	0.001	0.1086	2.33804	2	1356.65	-0.583287	15.4052	0
	High	HLETHNPVSR	1	2	1	Q61001		0	0.001	0.114	2.20677	3	1189.61	-0.314885	11.3675	0
	High	TSPDGPYQVSLR	1	5	1	Q61001		0	0.004	0.2139	2.02841	2	1319.66	-0.791657	14.4263	0
	High	APQQGVLNLHPcPYSSLcR	1	1	1	Q61001	C12(Carbamidomethyl); C18(Carbamidomethyl)	0	0.008	0.2694	1.99694	3	2197.06	-2.08225	17.2632	0
E9QPX1	Collagen alpha-1(XVIII) chain OS=Mus musculus GN=Col18a1 PE=4 SV=1 - [E9QPX1_MOUSE]	59.1615	12.01	3	16	16	21	1774	182.184	5.70654
	A2	Sequence	# PSMs	# Proteins	# Protein Groups	Protein Group Accessions	Modifications	ΔCn	q-Value	PEP	XCorr	Charge	MH+ [Da]	ΔM [ppm]	RT [min]	# Missed Cleavages
	High	TETTGATGQASSLLSGR	1	2	1	E9QPX1		0	0	0.0003051	4.6708	2	1636.81	-0.729284	14.2115	0
	High	GTGnEVAALQPPLVQLHEGSPYTR	2	2	1	E9QPX1	N4(Deamidated)	0	0	0.00109	4.03371	3	2535.29	0.534116	19.3607	0
	High	ISQIDDPHVGPAYIFGPDSNSGQVAQYHFPK	1	3	1	E9QPX1		0	0	0.007627	3.7226	4	3384.62	-1.06442	20.9174	0
	High	GAGLFVGQAGTADPDKFQGmISELK	1	2	1	E9QPX1	M20(Oxidation)	0	0	0.01534	3.63049	3	2553.26	-0.230908	19.0916	1
	High	IWATYQTmLDK	1	2	1	E9QPX1	M8(Oxidation)	0	0	0.02026	3.49734	2	1385.68	-1.03314	15.7287	0
	High	ADDILANPPR	1	2	1	E9QPX1		0	0	0.008989	3.47803	2	1081.56	-0.398756	13.4162	0
	High	GADFQcFQQAR	1	2	1	E9QPX1	C6(Carbamidomethyl)	0	0	0.01654	3.30721	2	1327.58	-0.896017	13.848	0
	High	IWATYQTMLDK	1	2	1	E9QPX1		0	0	0.03359	3.12987	2	1369.68	-1.46019	18.4732	0
	High	ASQGLELER	1	2	1	E9QPX1		0	0	0.03207	3.04193	2	1002.52	-0.760865	12.3194	0
	High	LmESYcETWR	1	2	1	E9QPX1	M2(Oxidation); C6(Carbamidomethyl)	0	0	0.04619	2.9664	2	1390.58	0.480237	14.1674	0
	High	EVPEGWLIFVAER	1	2	1	E9QPX1		0	0	0.01577	2.68966	2	1544.81	-0.554876	24.1363	0
	High	AVGLSGTFR	1	2	1	E9QPX1		0	0	0.02669	2.65337	2	907.499	-1.16644	13.9982	0
	High	GTGNEVAALQPPLVQLHEGSPYTR	1	2	1	E9QPX1		0	0	0.002994	2.59056	3	2534.29	-2.71413	18.932	0
	High	ILNVAQGIR	1	3	1	E9QPX1		0	0	0.01782	2.57622	2	983.598	-1.33801	14.7624	0
	High	LQDLYSIVR	1	2	1	E9QPX1		0	0	0.01863	2.41659	2	1106.62	-0.166673	17.7224	0
	High	SVWHGSDPSGR	2	2	1	E9QPX1		0	0	0.03139	2.12521	3	1184.54	-0.889137	11.2636	0
	High	LMESYcETWR	1	2	1	E9QPX1	C6(Carbamidomethyl)	0	0.001	0.09753	2.34501	2	1374.58	-0.460514	15.6513	0
	High	KVLLEAR	1	2	1	E9QPX1		0	0.001	0.1904	1.74861	2	828.53	-0.751555	12.0095	1
	High	HPAWPQK	1	2	1	E9QPX1		0	0.004	0.2095	2.08721	2	863.452	-0.452184	11.4553	0
A2AJY2	Collagen alpha-1(XV) chain OS=Mus musculus GN=Col15a1 PE=4 SV=1 - [A2AJY2_MOUSE]	53.5333	13.68	4	14	14	17	1345	138.206	4.88135
	A2	Sequence	# PSMs	# Proteins	# Protein Groups	Protein Group Accessions	Modifications	ΔCn	q-Value	PEP	XCorr	Charge	MH+ [Da]	ΔM [ppm]	RT [min]	# Missed Cleavages
	High	NLVTALSDmGDmLQK	2	4	1	A2AJY2	M9(Oxidation); M12(Oxidation)	0	0	0.002426	4.7178	2	1667.79	-2.02545	17.4813	0
	High	TTDmAVTGFASPLSTGK	1	4	1	A2AJY2	M4(Oxidation)	0	0	0.007183	4.64805	2	1699.82	-0.771078	16.3134	0
	High	AFLSSHLQDLSTVVR	2	4	1	A2AJY2		0	0	0.003744	4.41488	2	1672.9	-1.0098	19.4717	0
	High	FTGSIQQLTIYSDPR	1	2	1	A2AJY2		0	0	0.003829	3.75341	2	1725.88	1.33315	18.4405	0
	High	SSWPLTFEPSAGIFVGNAGAmGLER	1	2	1	A2AJY2	M21(Oxidation)	0	0	0.004967	3.51131	3	2610.26	-0.632883	23.6654	0
	High	ADFQcFQQAR	1	4	1	A2AJY2	C5(Carbamidomethyl)	0	0	0.01686	3.24287	2	1270.56	-2.19653	13.5226	0
	High	VILYYTEPGSHVSR	2	2	1	A2AJY2		0	0	0.01588	3.20871	2	1620.84	-0.458669	15.3069	0
	High	EAAVFSVPVmTNR	1	2	1	A2AJY2	M10(Oxidation)	0	0	0.01348	3.02805	2	1436.72	-0.200455	16.2589	0
	High	GADGTSTmGPPGPR	1	2	1	A2AJY2	M8(Oxidation)	0	0	0.04768	2.90501	2	1316.59	-1.21511	10.9007	0
	High	AAGLLSTFR	1	4	1	A2AJY2		0	0	0.03383	2.8918	2	935.531	-0.0105953	17.2755	0
	High	VVWHGSNPHGVR	1	4	1	A2AJY2		0	0	0.07982	2.49567	3	1344.69	-0.825243	12.7253	0
	High	DSGEFFIR	1	4	1	A2AJY2		0	0.001	0.1022	2.43199	2	970.463	-0.108347	16.9261	0
	High	LVDKYcEAWR	1	4	1	A2AJY2	C6(Carbamidomethyl)	0	0.001	0.1129	2.3389	2	1339.64	-1.43958	14.5222	1
	High	VIYLGLR	1	2	1	A2AJY2		0	0.001	0.1817	2.16839	2	833.524	-0.709069	17.032	0
B7ZNH7	Collagen alpha-1(XIV) chain OS=Mus musculus GN=Col14a1 PE=2 SV=1 - [B7ZNH7_MOUSE]	43.2741	10.59	4	15	15	15	1794	192.635	5.09717
	A2	Sequence	# PSMs	# Proteins	# Protein Groups	Protein Group Accessions	Modifications	ΔCn	q-Value	PEP	XCorr	Charge	MH+ [Da]	ΔM [ppm]	RT [min]	# Missed Cleavages
	High	NFLENLVTAFNVGSEK	1	3	1	B7ZNH7		0	0	0.009773	3.86513	2	1781.91	1.1571	26.3349	0
	High	NLVVDDETATSLR	1	3	1	B7ZNH7		0	0	0.006788	3.73269	2	1432.73	-0.461253	15.1351	0
	High	LQELEGPSVSImQK	1	3	1	B7ZNH7	M12(Oxidation)	0	0	0.01241	3.64271	2	1574.81	0.91718	14.8938	0
	High	IVLESLQDTQAQESTVGGGVNR	1	3	1	B7ZNH7		0	0	0.0005975	3.61906	3	2301.17	0.338161	16.4397	0
	High	YLHPEGLPSDYTmSFLFR	1	4	1	B7ZNH7	M13(Oxidation)	0	0	0.005152	3.54209	3	2189.04	1.13828	21.8219	0
	High	NSEPLVGIILDNGGK	1	4	1	B7ZNH7		0	0	0.06262	3.17019	2	1525.82	-1.96085	20.7235	0
	High	HVFFVDDFDAFKK	1	3	1	B7ZNH7		0	0	0.02891	3.01047	3	1614.79	-1.34903	21.51	1
	High	IGILITDGK	1	3	1	B7ZNH7		0	0	0.04607	2.73482	2	929.567	0.433428	16.1415	0
	High	IGLAQYSGDPR	1	3	1	B7ZNH7		0	0	0.01966	2.59549	2	1176.6	-4.09353	13.7106	0
	High	ESGVELFAIGVK	1	3	1	B7ZNH7		0	0	0.02627	2.59185	2	1248.68	-1.35423	20.0592	0
	High	VIVVITDGR	1	3	1	B7ZNH7		0	0	0.05266	2.41948	2	971.588	-0.475552	14.6516	0
	High	GDLQSQAmVR	1	4	1	B7ZNH7	M8(Oxidation)	0	0	0.07469	2.21197	2	1120.54	-1.02043	10.9924	0
	High	VSEEWYNR	1	3	1	B7ZNH7		0	0.001	0.1821	2.08863	2	1082.49	-0.696375	13.1624	0
	High	SQDDIIPPSR	1	3	1	B7ZNH7		0	0.002	0.2019	2.22151	2	1127.57	0.395875	12.2833	0
	High	LmWIPVYGGK	1	3	1	B7ZNH7	M2(Oxidation)	0	0.006	0.2355	1.828	2	1179.62	0.895884	19.1319	0
P26039	Talin-1 OS=Mus musculus GN=Tln1 PE=1 SV=2 - [TLN1_MOUSE]	42.2898	6.85	13	11	11	12	2541	269.653	6.17627
	A2	Sequence	# PSMs	# Proteins	# Protein Groups	Protein Group Accessions	Modifications	ΔCn	q-Value	PEP	XCorr	Charge	MH+ [Da]	ΔM [ppm]	RT [min]	# Missed Cleavages
	High	LNEAAAGLNQAATELVQASR	1	3	1	P26039		0	0	8.477e-05	5.04716	2	2027.05	0.467972	20.2729	0
	High	VSQmAQYFEPLTLAAVGAASK	1	5	1	P26039	M4(Oxidation)	0	0	0.006792	4.67063	2	2198.12	-0.345835	21.7616	0
	High	LAQAAQSSVATITR	1	5	1	P26039		0	0	0.001039	4.62746	2	1416.78	-0.959145	12.9158	0
	High	LLGEIAQGNENYAGIAAR	1	3	1	P26039		0	0	0.003482	4.24383	2	1859.96	-0.713405	17.1977	0
	High	TLAESALQLLYTAK	1	5	1	P26039		0	0	0.007605	3.83246	2	1521.85	-2.16492	23.1847	0
	High	TmLESAGGLIQTAR	1	5	1	P26039	M2(Oxidation)	0	0	0.004244	3.60532	2	1463.75	1.60544	15.2488	0
	High	VLVQNAAGSQEK	1	5	1	P26039		0	0	0.05533	2.83946	2	1243.66	-0.523898	10.8838	0
	High	GVAALTSDPAVQAIVLDTASDVLDK	2	3	1	P26039		0	0	0.01999	2.80339	3	2469.31	-1.14816	25.9938	0
	High	NLGTALAELR	1	3	1	P26039		0	0	0.04227	2.77595	2	1057.6	-1.79574	18.1898	0
	High	TLSHPQQmALLDQTK	1	5	1	P26039	M8(Oxidation)	0	0	0.03613	2.64208	3	1726.88	-1.87886	13.1078	0
	High	VmVTNVTSLLK	1	13	1	P26039	M2(Oxidation)	0	0	0.0221	2.59188	2	1220.69	-0.203418	18.1679	0
Q9Z1R9	MCG124046 OS=Mus musculus GN=Prss1 PE=2 SV=1 - [Q9Z1R9_MOUSE]	37.9325	12.2	10	2	2	14	246	26.1178	4.94482
	A2	Sequence	# PSMs	# Proteins	# Protein Groups	Protein Group Accessions	Modifications	ΔCn	q-Value	PEP	XCorr	Charge	MH+ [Da]	ΔM [ppm]	RT [min]	# Missed Cleavages
	High	LGEHnINVLEGNEQFIDAAK	8	1	1	Q9Z1R9	N5(Deamidated)	0	0	0.000197	5.9472	3	2212.09	-0.0775229	18.1556	0
	High	LGEHNINVLEGNEQFIDAAK	4	1	1	Q9Z1R9		0	0	0.02103	3.84696	2	2211.1	-0.59269	18.5445	0
	High	TLNnDImLIK	2	10	1	Q9Z1R9	N4(Deamidated); M7(Oxidation)	0	0	0.03671	3.36201	2	1191.63	-1.89297	16.8741	0
Q922U2	Keratin, type II cytoskeletal 5 OS=Mus musculus GN=Krt5 PE=1 SV=1 - [K2C5_MOUSE]	32.0182	17.93	17	5	11	12	580	61.7286	7.75244
	A2	Sequence	# PSMs	# Proteins	# Protein Groups	Protein Group Accessions	Modifications	ΔCn	q-Value	PEP	XCorr	Charge	MH+ [Da]	ΔM [ppm]	RT [min]	# Missed Cleavages
	High	YEELQQTAGR	1	1	1	Q922U2		0	0	0.01571	4.05112	2	1194.57	-0.598499	11.2064	0
	High	SLDLDSIIAEVK	2	9	2	Q922U2;P50446		0	0	0.01665	4.04235	2	1302.71	-0.698774	22.7	0
	High	LRSEIDNVKK	1	2	1	Q922U2		0	0	0.03856	3.86847	3	1201.69	-0.402785	11.5061	2
	High	VDALmDEINFmK	1	1	1	Q922U2	M5(Oxidation); M11(Oxidation)	0	0	0.00522	3.39978	2	1457.66	-1.81669	16.7619	0
	High	LALDVEIATYR	1	13	3	Q3UV17;Q922U2;P50446		0	0	0.01278	2.87367	2	1263.69	-0.384622	19.0602	0
	High	TEAESWYQTK	1	1	1	Q922U2		0	0	0.03742	2.60145	2	1242.56	0.0217308	13.0721	0
	High	NKYEDEINKR	1	7	2	Q922U2;Q8VED5		0	0	0.05011	2.29539	3	1308.65	-1.05	11.6701	2
	High	FASFIDKVR	1	25	7	B2RTP7;Q3UV17;P04104;Q922U2;P50446;Q8VED5;E9Q1Z0		0	0.001	0.1013	2.4978	2	1082.6	-0.0651554	16.2376	1
	High	LLEGEEcR	1	22	6	B2RTP7;Q3UV17;Q922U2;P50446;Q80TQ3;E9Q1Z0	C7(Carbamidomethyl)	0	0.001	0.1801	2.0467	2	1005.47	1.70196	11.1329	0
	High	FASFIDK	1	26	7	B2RTP7;Q3UV17;P04104;Q922U2;P50446;Q8VED5;E9Q1Z0		0	0.001	0.1455	2.03551	2	827.429	-0.473004	14.8314	0
	High	TTAENEFVmLKK	1	1	1	Q922U2	M9(Oxidation)	0	0.001	0.152	1.5569	3	1426.72	0.141503	14.2984	1
Q62261	Spectrin beta chain, non-erythrocytic 1 OS=Mus musculus GN=Sptbn1 PE=1 SV=2 - [SPTB2_MOUSE]	30.2546	5.25	5	8	8	9	2363	274.052	5.57959
	A2	Sequence	# PSMs	# Proteins	# Protein Groups	Protein Group Accessions	Modifications	ΔCn	q-Value	PEP	XCorr	Charge	MH+ [Da]	ΔM [ppm]	RT [min]	# Missed Cleavages
	High	SQNIITDSSSLNAEAIR	1	1	1	Q62261		0	0	0.0003723	5.90502	2	1818.92	0.38384	16.5595	0
	High	TQTAIASEDmPNTLTEAEK	1	2	1	Q62261	M10(Oxidation)	0	0	0.0002303	5.7726	2	2065.96	0.361274	13.3674	0
	High	HQILEQAVEDYAETVHQLSK	2	2	1	Q62261		0	0	0.004615	4.57565	3	2338.16	-1.56098	24.4792	0
	High	LTTLELLEVR	1	4	1	Q62261		0	0	0.01743	2.9826	2	1186.7	-0.163654	20.6144	0
	High	SALPAQSAATLPAR	1	2	1	Q62261		0	0	0.02482	2.50718	2	1353.75	-0.615356	13.5197	0
	High	IVSSNDVGHDEYSTQSLVK	1	2	1	Q62261		0	0	0.005259	2.13693	3	2078	-0.716978	14.1158	0
	High	ILSSDDYGKDLTSVmR	1	2	1	Q62261	M15(Oxidation)	0	0.001	0.1335	1.94935	3	1815.88	-0.783346	15.1441	1
	High	VAVVNQIAR	1	2	1	Q62261		0	0.007	0.2594	2.83892	2	969.584	-0.00961882	12.5878	0
A2A513	Keratin, type I cytoskeletal 10 OS=Mus musculus GN=Krt10 PE=3 SV=1 - [A2A513_MOUSE]	28.0049	12.3	20	6	8	10	561	57.0067	5.07178
	A2	Sequence	# PSMs	# Proteins	# Protein Groups	Protein Group Accessions	Modifications	ΔCn	q-Value	PEP	XCorr	Charge	MH+ [Da]	ΔM [ppm]	RT [min]	# Missed Cleavages
	High	ALEESNYELEGK	1	2	1	A2A513		0	0	0.002138	4.08889	2	1381.65	-1.04599	13.0391	0
	High	QSLEASLAETEGR	1	2	1	A2A513		0	0	0.003659	3.33682	2	1390.68	0.105396	15.0829	0
	High	LENEIQTYR	1	2	1	A2A513		0	0	0.06329	2.91263	2	1165.58	-0.878072	12.4294	0
	High	VTmQNLNDR	1	12	2	A2A513;Q61414	M3(Oxidation)	0	0	0.07872	2.82927	2	1106.52	-1.33268	10.6849	0
	High	LAADDFR	1	25	3	A2A513;Q61414;Q6IFX2		0	0	0.07828	2.59248	2	807.399	-0.538537	12.5049	0
	High	VTMQNLNDR	2	12	2	A2A513;Q61414		0	0.001	0.1163	2.78203	2	1090.53	-2.76893	11.6443	0
	High	QSVEADINGLR	1	3	1	A2A513		0	0.001	0.08874	2.49394	2	1201.62	-1.29252	14.8696	0
	High	QSVEADINGLRR	1	3	1	A2A513		0	0.001	0.1141	2.20617	3	1357.72	-1.14259	14.5068	1
	High	IKEWYEK	1	2	1	A2A513		0	0.008	0.27	2.37149	2	995.519	-0.971296	13.1051	1
B2RTP7	Krt2 protein OS=Mus musculus GN=Krt2 PE=2 SV=1 - [B2RTP7_MOUSE]	22.6565	7.36	6	4	7	9	707	70.8798	8.06006
	A2	Sequence	# PSMs	# Proteins	# Protein Groups	Protein Group Accessions	Modifications	ΔCn	q-Value	PEP	XCorr	Charge	MH+ [Da]	ΔM [ppm]	RT [min]	# Missed Cleavages
	High	GFSSGSAVVSGGSR	1	2	1	B2RTP7		0	0	0.001386	3.84559	2	1254.61	-0.505535	11.6645	0
	High	KYEDEINKR	1	2	1	B2RTP7		0	0	0.0434	2.80829	3	1194.61	-0.160829	11.1356	2
	High	LLRDYQELMNTK	1	3	1	B2RTP7		0	0	0.07901	2.52479	3	1523.79	-0.0209306	16.7155	1
	High	FASFIDKVR	1	25	7	B2RTP7;Q3UV17;P04104;Q922U2;P50446;Q8VED5;E9Q1Z0		0	0.001	0.1013	2.4978	2	1082.6	-0.0651554	16.2376	1
	High	DYQELmNTK	1	3	1	B2RTP7	M6(Oxidation)	0	0.001	0.1539	2.43584	2	1157.51	-0.022872	11.3896	0
	High	LLEGEEcR	1	22	6	B2RTP7;Q3UV17;Q922U2;P50446;Q80TQ3;E9Q1Z0	C7(Carbamidomethyl)	0	0.001	0.1801	2.0467	2	1005.47	1.70196	11.1329	0
	High	FASFIDK	1	26	7	B2RTP7;Q3UV17;P04104;Q922U2;P50446;Q8VED5;E9Q1Z0		0	0.001	0.1455	2.03551	2	827.429	-0.473004	14.8314	0
	High	LLRDYQELmNTK	1	3	1	B2RTP7	M9(Oxidation)	0	0.007	0.2515	2.54652	3	1539.78	-1.15785	13.8885	1
	High	DYQELMNTK	1	3	1	B2RTP7		0	0.007	0.258	1.91545	2	1141.52	-1.26968	14.0036	0
O88393	Transforming growth factor beta receptor type 3 OS=Mus musculus GN=Tgfbr3 PE=1 SV=1 - [TGBR3_MOUSE]	20.5661	9.06	3	6	6	7	850	93.7691	5.99854
	A2	Sequence	# PSMs	# Proteins	# Protein Groups	Protein Group Accessions	Modifications	ΔCn	q-Value	PEP	XCorr	Charge	MH+ [Da]	ΔM [ppm]	RT [min]	# Missed Cleavages
	High	mSDYTIIENIcPK	1	1	1	O88393	M1(Oxidation); C11(Carbamidomethyl)	0	0	0.007501	4.02667	2	1599.74	0.798807	17.8915	0
	High	NFLSLNYLAEYLQPK	2	2	1	O88393		0	0	0.0248	3.33572	2	1812.95	0.707134	25.5973	0
	High	STDQGLGQPQR	1	2	1	O88393		0	0	0.02377	3.0701	2	1186.58	-1.37026	10.7429	0
	High	TFTKPLAVVLQVDYK	1	2	1	O88393		0	0	0.02393	2.91692	3	1721.98	-2.03462	20.5107	0
	High	EYGAVTSFTELK	1	2	1	O88393		0	0	0.01764	2.8131	2	1344.67	0.301487	17.3056	0
	High	VIAPDSIGFGK	1	1	1	O88393		0	0.001	0.1864	2.01724	2	1103.61	-1.04681	16.1544	0
P50446	Keratin, type II cytoskeletal 6A OS=Mus musculus GN=Krt6a PE=2 SV=3 - [K2C6A_MOUSE]	19.8132	12.12	13	1	6	7	553	59.2986	7.94287
	A2	Sequence	# PSMs	# Proteins	# Protein Groups	Protein Group Accessions	Modifications	ΔCn	q-Value	PEP	XCorr	Charge	MH+ [Da]	ΔM [ppm]	RT [min]	# Missed Cleavages
	High	SLDLDSIIAEVK	2	9	2	Q922U2;P50446		0	0	0.01665	4.04235	2	1302.71	-0.698774	22.7	0
	High	ALYEAELSqMqTHISDTSVVLSmDNNR	1	1	1	P50446	Q9(Deamidated); Q11(Deamidated); M23(Oxidation)	0	0	0.05289	4.01118	3	3070.41	3.71961	17.5345	0
	High	LALDVEIATYR	1	13	3	Q3UV17;Q922U2;P50446		0	0	0.01278	2.87367	2	1263.69	-0.384622	19.0602	0
	High	FASFIDKVR	1	25	7	B2RTP7;Q3UV17;P04104;Q922U2;P50446;Q8VED5;E9Q1Z0		0	0.001	0.1013	2.4978	2	1082.6	-0.0651554	16.2376	1
	High	LLEGEEcR	1	22	6	B2RTP7;Q3UV17;Q922U2;P50446;Q80TQ3;E9Q1Z0	C7(Carbamidomethyl)	0	0.001	0.1801	2.0467	2	1005.47	1.70196	11.1329	0
	High	FASFIDK	1	26	7	B2RTP7;Q3UV17;P04104;Q922U2;P50446;Q8VED5;E9Q1Z0		0	0.001	0.1455	2.03551	2	827.429	-0.473004	14.8314	0
P28653	Biglycan OS=Mus musculus GN=Bgn PE=2 SV=1 - [PGS1_MOUSE]	18.5043	29	5	7	7	7	369	41.6126	7.26904
	A2	Sequence	# PSMs	# Proteins	# Protein Groups	Protein Group Accessions	Modifications	ΔCn	q-Value	PEP	XCorr	Charge	MH+ [Da]	ΔM [ppm]	RT [min]	# Missed Cleavages
	High	NmNcIEmGGNPLENSGFEPGAFDGLK	1	4	1	P28653	M2(Oxidation); C4(Carbamidomethyl); M7(Oxidation)	0	0	0.02415	4.71558	3	2830.21	-1.90808	20.4718	0
	High	VGINDFcPmGFGVK	1	4	1	P28653	C7(Carbamidomethyl); M9(Oxidation)	0	0	0.04804	3.36546	2	1556.72	-0.0847672	18.9904	0
	High	NHLVEIPPNLPSSLVELR	1	2	1	P28653		0	0	0.0007167	3.35343	3	2027.13	1.21515	22.009	0
	High	LGLGHNQIR	1	4	1	P28653		0	0	0.04945	2.68174	2	1007.57	-0.26296	12.5589	0
	High	EISPDTTLLDLQNNDISELRK	1	4	1	P28653		0	0.001	0.1134	1.93206	3	2414.24	-0.619323	20.2449	1
	High	VPAGLPDLK	1	4	1	P28653		0	0.001	0.09317	1.78506	2	909.539	-1.20617	15.2692	0
	High	VVQcSDLGLK	1	5	1	P28653	C4(Carbamidomethyl)	0	0.006	0.2259	2.60303	2	1118.59	-0.568314	13.146	0
P04104	Keratin, type II cytoskeletal 1 OS=Mus musculus GN=Krt1 PE=1 SV=4 - [K2C1_MOUSE]	18.4018	5.18	6	3	5	6	637	65.5653	8.14795
	A2	Sequence	# PSMs	# Proteins	# Protein Groups	Protein Group Accessions	Modifications	ΔCn	q-Value	PEP	XCorr	Charge	MH+ [Da]	ΔM [ppm]	RT [min]	# Missed Cleavages
	High	FLEQQNQVLQTK	1	6	1	P04104		0	0	0.04295	4.36992	2	1475.78	-0.245017	13.8359	0
	High	TNAENEFVTIKK	2	1	1	P04104		0	0	0.01946	3.85027	2	1393.73	-0.354622	13.5759	1
	High	TNAENEFVTIK	1	1	1	P04104		0	0	0.02258	3.13868	2	1265.64	-0.583969	14.891	0
	High	FASFIDKVR	1	25	7	B2RTP7;Q3UV17;P04104;Q922U2;P50446;Q8VED5;E9Q1Z0		0	0.001	0.1013	2.4978	2	1082.6	-0.0651554	16.2376	1
	High	FASFIDK	1	26	7	B2RTP7;Q3UV17;P04104;Q922U2;P50446;Q8VED5;E9Q1Z0		0	0.001	0.1455	2.03551	2	827.429	-0.473004	14.8314	0
Q3UFP7	Putative uncharacterized protein (Fragment) OS=Mus musculus GN=Nrp1 PE=2 SV=1 - [Q3UFP7_MOUSE]	17.8975	10.87	3	5	5	5	837	93.5357	5.77002
	A2	Sequence	# PSMs	# Proteins	# Protein Groups	Protein Group Accessions	Modifications	ΔCn	q-Value	PEP	XCorr	Charge	MH+ [Da]	ΔM [ppm]	RT [min]	# Missed Cleavages
	High	TGPIQDHTGDGNFIYSQADENQK	1	3	1	Q3UFP7		0	0	0.0003944	5.26621	3	2535.14	-1.13214	14.7533	0
	High	SFEGNNNYDTPELR	1	3	1	Q3UFP7		0	0	0.006572	4.47117	2	1655.73	-0.736924	14.4351	0
	High	FVTAVGTQGAISK	1	3	1	Q3UFP7		0	0	0.001672	3.33601	2	1278.7	-0.41588	13.4443	0
	High	IAPSPVVSSGPFLFIK	1	3	1	Q3UFP7		0	0	0.04561	2.69646	2	1658.95	-0.137247	22.5669	0
	High	AIIFQGNTNPTDVVLGVFSKPLITR	1	3	1	Q3UFP7		0	0.001	0.1411	2.12768	3	2700.5	-1.75709	25.2818	0
Q8BJD1	Inter-alpha-trypsin inhibitor heavy chain H5 OS=Mus musculus GN=Itih5 PE=2 SV=1 - [ITIH5_MOUSE]	17.2455	7.56	2	6	6	6	952	106.683	8.1626
	A2	Sequence	# PSMs	# Proteins	# Protein Groups	Protein Group Accessions	Modifications	ΔCn	q-Value	PEP	XCorr	Charge	MH+ [Da]	ΔM [ppm]	RT [min]	# Missed Cleavages
	High	LLNNYVAQNDIEDR	1	1	1	Q8BJD1		0	0	0.00809	3.48283	2	1676.82	-0.583082	15.3342	0
	High	IAQNGILGDFIVR	1	2	1	Q8BJD1		0	0	0.05076	3.24937	2	1415.8	-0.529039	21.3396	0
	High	AAFFLSYEELLQR	1	2	1	Q8BJD1		0	0	0.02329	2.80604	2	1586.82	-1.02819	23.7547	0
	High	FNIIGFSNR	1	1	1	Q8BJD1		0	0	0.074	2.72573	2	1067.56	-0.477312	18.846	0
	High	SGITSLEVLPLHNSR	1	2	1	Q8BJD1		0	0	0.02562	2.6343	3	1622.88	-1.14662	18.8489	0
	High	TPLLSDIR	1	1	1	Q8BJD1		0	0.001	0.1717	2.34721	2	914.53	-0.773632	15.7145	0
A3KGU5	Spectrin alpha chain, non-erythrocytic 1 OS=Mus musculus GN=Sptan1 PE=1 SV=1 - [A3KGU5_MOUSE]	17.0901	4.72	11	6	6	6	2457	282.72	5.32568
	A2	Sequence	# PSMs	# Proteins	# Protein Groups	Protein Group Accessions	Modifications	ΔCn	q-Value	PEP	XCorr	Charge	MH+ [Da]	ΔM [ppm]	RT [min]	# Missed Cleavages
	High	DLAALGDKVNSLGETAQR	1	7	1	A3KGU5		0	0	0.003774	4.51354	3	1857.96	-1.17961	16.9049	1
	High	SSLSSAQADFNQLAELDR	1	11	1	A3KGU5		0	0	0.0004551	4.50371	2	1951.93	-2.34815	20.2889	0
	High	EAFLNTEDKGDSLDSVEALIK	1	7	1	A3KGU5		0	0	0.01136	3.06325	3	2294.14	-0.401064	21.2624	1
	High	NQALNTDNYGHDLASVQALQR	1	7	1	A3KGU5		0	0	0.00782	3.00264	3	2328.13	0.679184	17.2041	0
	High	IAALQAFADQLIAVDHYAK	1	7	1	A3KGU5		0	0	0.07021	2.00691	3	2058.1	-0.790236	25.4985	0
	High	LQTASDESYKDPTNIQLSK	1	6	1	A3KGU5		0	0.001	0.1338	1.87986	3	2138.06	0.404856	14.1431	1
E9Q1Z0	Protein 4732456N10Rik OS=Mus musculus GN=4732456N10Rik PE=3 SV=1 - [E9Q1Z0_MOUSE]	16.5813	7.43	9	1	5	6	538	58.1882	8.25049
	A2	Sequence	# PSMs	# Proteins	# Protein Groups	Protein Group Accessions	Modifications	ΔCn	q-Value	PEP	XCorr	Charge	MH+ [Da]	ΔM [ppm]	RT [min]	# Missed Cleavages
	High	SLnLDSIIAEVK	2	3	1	E9Q1Z0	N3(Deamidated)	0	0	0.01664	4.04235	2	1302.71	-0.695703	22.7	0
	High	LALDIEIATYR	1	7	1	E9Q1Z0		0	0	0.04782	3.6529	2	1277.71	-0.782123	20.3015	0
	High	FASFIDKVR	1	25	7	B2RTP7;Q3UV17;P04104;Q922U2;P50446;Q8VED5;E9Q1Z0		0	0.001	0.1013	2.4978	2	1082.6	-0.0651554	16.2376	1
	High	LLEGEEcR	1	22	6	B2RTP7;Q3UV17;Q922U2;P50446;Q80TQ3;E9Q1Z0	C7(Carbamidomethyl)	0	0.001	0.1801	2.0467	2	1005.47	1.70196	11.1329	0
	High	FASFIDK	1	26	7	B2RTP7;Q3UV17;P04104;Q922U2;P50446;Q8VED5;E9Q1Z0		0	0.001	0.1455	2.03551	2	827.429	-0.473004	14.8314	0
D3YVS6	Protein G6b OS=Mus musculus GN=G6b PE=4 SV=1 - [D3YVS6_MOUSE]	16.2875	36.04	2	6	6	6	197	21.1853	10.0962
	A2	Sequence	# PSMs	# Proteins	# Protein Groups	Protein Group Accessions	Modifications	ΔCn	q-Value	PEP	XCorr	Charge	MH+ [Da]	ΔM [ppm]	RT [min]	# Missed Cleavages
	High	RLELLLSAGDSGTFFcK	1	2	1	D3YVS6	C16(Carbamidomethyl)	0	0	0.01086	3.50199	3	1913.98	-0.838127	21.8124	1
	High	RPILWASTR	1	2	1	D3YVS6		0	0	0.04808	2.85048	2	1099.64	-0.896026	15.4512	0
	High	VNLScIGVSDPTR	1	2	1	D3YVS6	C5(Carbamidomethyl)	0	0	0.01298	2.84189	2	1417.71	-0.315131	15.753	0
	High	GTPTVLQHFSGR	1	2	1	D3YVS6		0	0	0.01759	2.7922	2	1299.68	-0.652677	15.0186	0
	High	TVLQVLGDK	1	2	1	D3YVS6		0	0	0.01499	2.18212	2	972.572	-0.790099	15.9513	0
	High	WAWAPSFPAcK	1	2	1	D3YVS6	C10(Carbamidomethyl)	0	0.001	0.1671	2.11883	2	1320.62	-1.68118	19.9413	0
Q60675	Laminin subunit alpha-2 OS=Mus musculus GN=Lama2 PE=1 SV=2 - [LAMA2_MOUSE]	16.227	2.28	2	5	5	5	3118	343.593	6.0874
	A2	Sequence	# PSMs	# Proteins	# Protein Groups	Protein Group Accessions	Modifications	ΔCn	q-Value	PEP	XCorr	Charge	MH+ [Da]	ΔM [ppm]	RT [min]	# Missed Cleavages
	High	EVAEDELVAAEGLLK	1	1	1	Q60675		0	0	0.002437	4.45088	2	1585.84	4.10337	21.3734	0
	High	TAVADNLLFYLGSAK	1	2	1	Q60675		0	0	0.0225	3.35052	2	1582.84	-1.70899	22.9549	0
	High	FIDFLAIEmR	1	2	1	Q60675	M9(Oxidation)	0	0	0.03778	2.97881	2	1270.65	-1.55622	21.8693	0
	High	DETGFATYKPQVIIR	1	1	1	Q60675		0	0	0.06966	2.67848	3	1737.92	-1.01498	17.4752	0
	High	LLGEINSVIDYVDDIK	1	1	1	Q60675		0	0.001	0.13	2.76831	2	1805.96	1.94431	24.5843	0
Q792Z1	MCG140784 OS=Mus musculus GN=Try10 PE=2 SV=1 - [Q792Z1_MOUSE]	15.9078	14.63	2	1	2	6	246	26.2039	5.8335
	A2	Sequence	# PSMs	# Proteins	# Protein Groups	Protein Group Accessions	Modifications	ΔCn	q-Value	PEP	XCorr	Charge	MH+ [Da]	ΔM [ppm]	RT [min]	# Missed Cleavages
	High	LGEHNInVLEGNEQFIDAANIIKHPK	4	1	1	Q792Z1	N7(Deamidated)	0	0	0.05112	4.47557	3	2914.51	0.424405	22.8721	1
	High	TLDNDImLIK	1	2	1	Q792Z1	M7(Oxidation)	0.0446	0	0.03715	3.21381	2	1191.63	-1.89633	16.8741	0
	High	LGEHnInVLEGNEQFIDAANIIKHPK	1	1	1	Q792Z1	N5(Deamidated); N7(Deamidated)	0	0.001	0.1566	3.98421	3	2915.51	5.82293	22.8226	1
Q61554	Fibrillin-1 OS=Mus musculus GN=Fbn1 PE=1 SV=1 - [FBN1_MOUSE]	15.1751	2.86	2	6	6	7	2871	312.051	4.91943
	A2	Sequence	# PSMs	# Proteins	# Protein Groups	Protein Group Accessions	Modifications	ΔCn	q-Value	PEP	XCorr	Charge	MH+ [Da]	ΔM [ppm]	RT [min]	# Missed Cleavages
	High	IKGTQcEDINEcEVFPGVcK	1	4	1	Q61554	C6(Carbamidomethyl); C12(Carbamidomethyl); C19(Carbamidomethyl)	0	0	0.007194	4.53503	3	2383.07	-0.386379	16.6791	1
	High	TcVDINEcVLDPGK	1	3	1	Q61554	C2(Carbamidomethyl); C8(Carbamidomethyl)	0	0	0.004362	3.64885	2	1619.74	-1.45986	16.1631	0
	High	TGcTDINEcEIGAHNcGR	1	3	1	Q61554	C3(Carbamidomethyl); C9(Carbamidomethyl); C16(Carbamidomethyl)	0	0	0.0145	2.42412	3	2063.83	-1.18995	11.9622	0
	High	cEcEIGYELDR	1	3	1	Q61554	C1(Carbamidomethyl); C3(Carbamidomethyl)	0	0	0.04349	2.36427	2	1443.59	-0.345914	14.9545	0
	High	SGNcYLnIRPR	2	1	1	Q61554	C4(Carbamidomethyl); N7(Deamidated)	0.0104	0	0.05642	1.90285	3	1350.66	0.126335	14.6813	0
	High	ISPDLcGR	1	4	1	Q61554	C6(Carbamidomethyl)	0	0.001	0.1814	2.20284	2	917.45	-1.26398	11.887	0
Q80X90	Filamin-B OS=Mus musculus GN=Flnb PE=1 SV=3 - [FLNB_MOUSE]	14.6243	2.57	4	2	6	6	2602	277.651	5.70654
	A2	Sequence	# PSMs	# Proteins	# Protein Groups	Protein Group Accessions	Modifications	ΔCn	q-Value	PEP	XCorr	Charge	MH+ [Da]	ΔM [ppm]	RT [min]	# Missed Cleavages
	High	SPFTVGVAAPLDLSK	1	1	1	Q80X90		0	0	0.01276	4.18601	2	1501.83	-0.523575	20.041	0
	High	LIALLEVLSQK	1	9	2	B7FAU9;Q80X90		0	0	0.009252	3.68155	2	1226.77	-0.607723	24.004	0
	High	GAGIGGLGITVEGPSESK	1	1	1	Q80X90		0	0	0.005975	2.96306	2	1628.85	0.0475136	17.5625	0
	High	LLGWIQNK	1	10	2	B7FAU9;Q80X90		0	0.001	0.1131	2.16503	2	971.567	-0.0133383	17.2101	0
	High	LVSIDSK	1	10	2	B7FAU9;Q80X90		0	0.001	0.1858	1.62868	2	761.44	-0.996147	11.5324	0
	High	IQQNTFTR	1	9	2	B7FAU9;Q80X90		0	0.001	0.09087	1.50109	2	1007.53	-0.725196	11.1902	0
P08122	Collagen alpha-2(IV) chain OS=Mus musculus GN=Col4a2 PE=2 SV=4 - [CO4A2_MOUSE]	13.1681	3.57	2	5	5	5	1707	167.22	8.48486
	A2	Sequence	# PSMs	# Proteins	# Protein Groups	Protein Group Accessions	Modifications	ΔCn	q-Value	PEP	XCorr	Charge	MH+ [Da]	ΔM [ppm]	RT [min]	# Missed Cleavages
	High	AHNQDLGLAGScLAR	1	1	1	P08122	C12(Carbamidomethyl)	0	0	0.008205	3.34106	3	1582.78	0.1293	14.7922	0
	High	IAVQPGTLGPQGR	1	1	1	P08122		0	0	0.02839	3.00954	2	1293.73	-1.76703	13.3019	0
	High	GLDGFQGPSGPR	1	2	1	P08122		0	0	0.0423	2.62784	2	1187.58	-1.07962	13.8085	0
	High	SVSIGYLLVK	1	1	1	P08122		0	0	0.07541	2.17008	2	1078.65	-1.38486	19.7535	0
	High	ATPFIEcnGGR	1	1	1	P08122	C7(Carbamidomethyl); N8(Deamidated)	0	0	0.0683	2.01955	2	1222.55	-1.78884	13.6357	0
Q61414	Keratin, type I cytoskeletal 15 OS=Mus musculus GN=Krt15 PE=1 SV=2 - [K1C15_MOUSE]	13.0382	5.53	22	1	3	5	452	49.1071	4.85596
	A2	Sequence	# PSMs	# Proteins	# Protein Groups	Protein Group Accessions	Modifications	ΔCn	q-Value	PEP	XCorr	Charge	MH+ [Da]	ΔM [ppm]	RT [min]	# Missed Cleavages
	High	VTmQNLNDR	1	12	2	A2A513;Q61414	M3(Oxidation)	0	0	0.07872	2.82927	2	1106.52	-1.33268	10.6849	0
	High	LAADDFR	1	25	3	A2A513;Q61414;Q6IFX2		0	0	0.07828	2.59248	2	807.399	-0.538537	12.5049	0
	High	VTMQNLNDR	2	12	2	A2A513;Q61414		0	0.001	0.1163	2.78203	2	1090.53	-2.76893	11.6443	0
	High	LASYLDKVR	1	5	1	Q61414		0	0.006	0.2309	2.44326	2	1064.61	-2.06431	13.8972	1
Q3UV17	Keratin, type II cytoskeletal 2 oral OS=Mus musculus GN=Krt76 PE=2 SV=1 - [K22O_MOUSE]	12.5288	6.23	6	1	5	5	594	62.806	8.42627
	A2	Sequence	# PSMs	# Proteins	# Protein Groups	Protein Group Accessions	Modifications	ΔCn	q-Value	PEP	XCorr	Charge	MH+ [Da]	ΔM [ppm]	RT [min]	# Missed Cleavages
	High	LALDVEIATYR	1	13	3	Q3UV17;Q922U2;P50446		0	0	0.01278	2.87367	2	1263.69	-0.384622	19.0602	0
	High	AQYEDIAQK	1	1	1	Q3UV17		0	0.001	0.1572	3.07509	2	1065.52	1.04465	11.2509	0
	High	FASFIDKVR	1	25	7	B2RTP7;Q3UV17;P04104;Q922U2;P50446;Q8VED5;E9Q1Z0		0	0.001	0.1013	2.4978	2	1082.6	-0.0651554	16.2376	1
	High	LLEGEEcR	1	22	6	B2RTP7;Q3UV17;Q922U2;P50446;Q80TQ3;E9Q1Z0	C7(Carbamidomethyl)	0	0.001	0.1801	2.0467	2	1005.47	1.70196	11.1329	0
	High	FASFIDK	1	26	7	B2RTP7;Q3UV17;P04104;Q922U2;P50446;Q8VED5;E9Q1Z0		0	0.001	0.1455	2.03551	2	827.429	-0.473004	14.8314	0
Q8VED5	Keratin, type II cytoskeletal 79 OS=Mus musculus GN=Krt79 PE=2 SV=2 - [K2C79_MOUSE]	10.9314	5.84	7	1	4	4	531	57.5168	7.69385
	A2	Sequence	# PSMs	# Proteins	# Protein Groups	Protein Group Accessions	Modifications	ΔCn	q-Value	PEP	XCorr	Charge	MH+ [Da]	ΔM [ppm]	RT [min]	# Missed Cleavages
	High	NLDLDSIIAEVK	1	1	1	Q8VED5		0	0	0.003093	4.10265	2	1329.72	-1.07866	22.6448	0
	High	NKYEDEINKR	1	7	2	Q922U2;Q8VED5		0	0	0.05011	2.29539	3	1308.65	-1.05	11.6701	2
	High	FASFIDKVR	1	25	7	B2RTP7;Q3UV17;P04104;Q922U2;P50446;Q8VED5;E9Q1Z0		0	0.001	0.1013	2.4978	2	1082.6	-0.0651554	16.2376	1
	High	FASFIDK	1	26	7	B2RTP7;Q3UV17;P04104;Q922U2;P50446;Q8VED5;E9Q1Z0		0	0.001	0.1455	2.03551	2	827.429	-0.473004	14.8314	0
Q6IFX2	Keratin, type I cytoskeletal 42 OS=Mus musculus GN=Krt42 PE=1 SV=1 - [K1C42_MOUSE]	10.8267	8.85	13	2	3	3	452	50.1019	5.16064
	A2	Sequence	# PSMs	# Proteins	# Protein Groups	Protein Group Accessions	Modifications	ΔCn	q-Value	PEP	XCorr	Charge	MH+ [Da]	ΔM [ppm]	RT [min]	# Missed Cleavages
	High	GQVGGDVNVEmDAAPGVDLSR	1	3	1	Q6IFX2	M11(Oxidation)	0	0	0.001945	4.48945	2	2101.98	-1.28957	15.6025	0
	High	ALEEANADLEVK	1	1	1	Q6IFX2		0	0	0.003662	3.74479	2	1301.66	-0.967389	13.573	0
	High	LAADDFR	1	25	3	A2A513;Q61414;Q6IFX2		0	0	0.07828	2.59248	2	807.399	-0.538537	12.5049	0
Q3TKB9	Putative uncharacterized protein (Fragment) OS=Mus musculus GN=Hsp90aa1 PE=2 SV=1 - [Q3TKB9_MOUSE]	9.22443	6.29	20	3	3	3	556	64.6977	4.98291
	A2	Sequence	# PSMs	# Proteins	# Protein Groups	Protein Group Accessions	Modifications	ΔCn	q-Value	PEP	XCorr	Charge	MH+ [Da]	ΔM [ppm]	RT [min]	# Missed Cleavages
	High	GVVDSEDLPLNISR	1	18	1	Q3TKB9		0	0	0.007365	3.89494	2	1513.78	-2.85486	17.9499	0
	High	ADLINNLGTIAK	1	10	1	Q3TKB9		0	0	0.02331	2.79466	2	1242.71	1.53666	17.8102	0
	High	YIDQEELNK	1	9	1	Q3TKB9		0	0	0.04703	2.53484	2	1151.56	-0.125433	11.7824	0
P18828	Syndecan-1 OS=Mus musculus GN=Sdc1 PE=1 SV=1 - [SDC1_MOUSE]	8.49504	7.4	3	3	3	3	311	32.8844	4.79248
	A2	Sequence	# PSMs	# Proteins	# Protein Groups	Protein Group Accessions	Modifications	ΔCn	q-Value	PEP	XCorr	Charge	MH+ [Da]	ΔM [ppm]	RT [min]	# Missed Cleavages
	High	DEGSYSLEEPK	1	2	1	P18828		0	0	0.02016	3.16692	2	1253.55	-0.277017	12.7579	0
	High	KKDEGSYSLEEPK	1	2	1	P18828		0	0	0.01804	3.15707	3	1509.74	-1.45081	13.0538	2
	High	VEGGGTSVIK	1	3	1	P18828		0	0	0.02136	2.17105	2	946.52	-0.459795	11.0362	0
A5JUZ1	Ubiqutin subunit 1 (Fragment) OS=Mus musculus GN=Ubc PE=2 SV=1 - [A5JUZ1_MOUSE]	8.18264	44.74	20	3	3	3	76	8.55962	7.25439
	A2	Sequence	# PSMs	# Proteins	# Protein Groups	Protein Group Accessions	Modifications	ΔCn	q-Value	PEP	XCorr	Charge	MH+ [Da]	ΔM [ppm]	RT [min]	# Missed Cleavages
	High	TITLEVEPSDTIENVK	1	18	1	A5JUZ1		0	0	0.005937	3.81152	2	1787.93	-0.185549	17.7529	0
	High	TLSDYNIQK	1	19	1	A5JUZ1		0	0.004	0.2144	1.96598	2	1081.55	-0.926539	12.3248	0
	High	ESTLHLVLR	1	19	1	A5JUZ1		0	0.006	0.2345	2.40514	2	1067.62	-1.52028	16.3498	0
Q64519	Syndecan-3 OS=Mus musculus GN=Sdc3 PE=2 SV=2 - [SDC3_MOUSE]	8.17303	5.66	1	1	1	2	442	45.9734	4.58936
	A2	Sequence	# PSMs	# Proteins	# Protein Groups	Protein Group Accessions	Modifications	ΔCn	q-Value	PEP	XCorr	Charge	MH+ [Da]	ΔM [ppm]	RT [min]	# Missed Cleavages
	High	GARPGPGLHDNAIDSGSSAAQLPQK	2	1	1	Q64519		0	0	6.208e-05	5.02739	3	2444.22	-1.79136	14.2442	0
E9QA74	Unconventional myosin-XVIIIa OS=Mus musculus GN=Myo18a PE=1 SV=1 - [E9QA74_MOUSE]	7.62751	1.83	6	2	2	2	1642	186.421	5.89697
	A2	Sequence	# PSMs	# Proteins	# Protein Groups	Protein Group Accessions	Modifications	ΔCn	q-Value	PEP	XCorr	Charge	MH+ [Da]	ΔM [ppm]	RT [min]	# Missed Cleavages
	High	VKDQEEELDEQAGSIQmLEQAK	1	6	1	E9QA74	M17(Oxidation)	0	0	0.004262	5.30429	3	2534.19	-0.482926	16.7403	1
	High	TFLQELER	1	6	1	E9QA74		0	0.001	0.1378	2.32321	2	1035.55	0.0611938	18.2456	0
A1L0X5	Krt78 protein (Fragment) OS=Mus musculus GN=Krt78 PE=2 SV=1 - [A1L0X5_MOUSE]	7.09914	2.85	5	2	2	2	492	54.7393	6.30322
	A2	Sequence	# PSMs	# Proteins	# Protein Groups	Protein Group Accessions	Modifications	ΔCn	q-Value	PEP	XCorr	Charge	MH+ [Da]	ΔM [ppm]	RT [min]	# Missed Cleavages
	High	SLNNQFASFIDK	1	5	1	A1L0X5		0	0	0.04786	3.65131	2	1383.69	-0.00439698	19.0338	0
	High	SLNNQFASFIDKVR	1	5	1	A1L0X5		0	0	0.01416	3.44784	2	1638.86	-1.48385	21.2009	1
P10126	Elongation factor 1-alpha 1 OS=Mus musculus GN=Eef1a1 PE=1 SV=3 - [EF1A1_MOUSE]	6.93416	7.58	5	2	2	2	462	50.0821	9.01221
	A2	Sequence	# PSMs	# Proteins	# Protein Groups	Protein Group Accessions	Modifications	ΔCn	q-Value	PEP	XCorr	Charge	MH+ [Da]	ΔM [ppm]	RT [min]	# Missed Cleavages
	High	VETGVLKPGmVVTFAPVNVTTEVK	1	3	1	P10126	M10(Oxidation)	0	0	0.004824	3.78349	3	2531.38	-1.37982	19.9751	0
	High	IGGIGTVPVGR	1	5	1	P10126		0	0	0.0463	3.15066	2	1025.61	-1.77969	14.3881	0
P07724	Serum albumin OS=Mus musculus GN=Alb PE=1 SV=3 - [ALBU_MOUSE]	6.2166	2.14	1	1	1	2	608	68.6477	6.07471
	A2	Sequence	# PSMs	# Proteins	# Protein Groups	Protein Group Accessions	Modifications	ΔCn	q-Value	PEP	XCorr	Charge	MH+ [Da]	ΔM [ppm]	RT [min]	# Missed Cleavages
	High	LGEYGFQNAILVR	2	1	1	P07724		0	0	0.003472	4.18681	2	1479.8	-0.0294264	19.5808	0
O35988	Syndecan-4 OS=Mus musculus GN=Sdc4 PE=1 SV=1 - [SDC4_MOUSE]	6.14643	15.15	2	2	2	2	198	21.469	4.41162
	A2	Sequence	# PSMs	# Proteins	# Protein Groups	Protein Group Accessions	Modifications	ΔCn	q-Value	PEP	XCorr	Charge	MH+ [Da]	ΔM [ppm]	RT [min]	# Missed Cleavages
	High	ETEVIDPQDLLEGR	1	2	1	O35988		0	0	0.03664	3.63149	2	1613.8	-2.79	20.1717	0
	High	VPSEPKELEENEVIPK	1	2	1	O35988		0	0	0.01441	2.51494	3	1836.96	0.424987	15.3541	1
Q80TQ3	MKIAA0845 protein (Fragment) OS=Mus musculus GN=Nefh PE=2 SV=1 - [Q80TQ3_MOUSE]	5.78582	2.29	2	1	2	2	1046	112.477	5.74463
	A2	Sequence	# PSMs	# Proteins	# Protein Groups	Protein Group Accessions	Modifications	ΔCn	q-Value	PEP	XCorr	Charge	MH+ [Da]	ΔM [ppm]	RT [min]	# Missed Cleavages
	High	IGFGPSPFSLTEGLPK	1	2	1	Q80TQ3		0	0	0.004469	3.73912	2	1646.88	0.316253	22.5076	0
	High	LLEGEEcR	1	22	6	B2RTP7;Q3UV17;Q922U2;P50446;Q80TQ3;E9Q1Z0	C7(Carbamidomethyl)	0	0.001	0.1801	2.0467	2	1005.47	1.70196	11.1329	0
Q99L05	Syndecan (Fragment) OS=Mus musculus GN=Sdc2 PE=2 SV=1 - [Q99L05_MOUSE]	5.72318	6.86	2	2	2	2	175	19.1266	4.56396
	A2	Sequence	# PSMs	# Proteins	# Protein Groups	Protein Group Accessions	Modifications	ΔCn	q-Value	PEP	XCorr	Charge	MH+ [Da]	ΔM [ppm]	RT [min]	# Missed Cleavages
	High	DEGSYDLGER	1	2	1	Q99L05		0	0	0.01924	3.14481	2	1140.48	-1.09404	12.1685	0
	High	KKDEGSYDLGER	1	2	1	Q99L05		0	0	0.05089	2.57837	3	1396.67	-1.31713	12.3307	2
E9Q0S6	Protein Tns1 OS=Mus musculus GN=Tns1 PE=1 SV=1 - [E9Q0S6_MOUSE]	5.4631	2.17	5	2	2	2	1888	201.257	7.75244
	A2	Sequence	# PSMs	# Proteins	# Protein Groups	Protein Group Accessions	Modifications	ΔCn	q-Value	PEP	XCorr	Charge	MH+ [Da]	ΔM [ppm]	RT [min]	# Missed Cleavages
	High	SKPSPQLSAETPVAALPEFPR	1	1	1	E9Q0S6		0	0	0.04754	3.17941	3	2222.18	-1.39922	20.0089	0
	High	ATSETLAADPTPAATIVHFK	1	5	1	E9Q0S6		0	0.001	0.1848	2.28369	3	2041.06	0.544381	17.9529	0
Q3U2P5	Putative uncharacterized protein OS=Mus musculus GN=Vwa8 PE=2 SV=1 - [Q3U2P5_MOUSE]	5.03309	11.46	3	2	2	2	349	39.5318	9.0708
	A2	Sequence	# PSMs	# Proteins	# Protein Groups	Protein Group Accessions	Modifications	ΔCn	q-Value	PEP	XCorr	Charge	MH+ [Da]	ΔM [ppm]	RT [min]	# Missed Cleavages
	High	NPELVPQNYISDSPAQSIVQHLR	1	3	1	Q3U2P5		0	0.001	0.0888	2.77033	3	2605.34	0.221571	21.5614	0
	High	DLLGQDVFLIGPPGPLR	1	3	1	Q3U2P5		0	0.004	0.2128	2.26275	2	1807.01	1.31055	24.9202	0
Q68FD5	Clathrin heavy chain 1 OS=Mus musculus GN=Cltc PE=1 SV=3 - [CLH1_MOUSE]	4.99227	1.25	7	2	2	2	1675	191.435	5.69385
	A2	Sequence	# PSMs	# Proteins	# Protein Groups	Protein Group Accessions	Modifications	ΔCn	q-Value	PEP	XCorr	Charge	MH+ [Da]	ΔM [ppm]	RT [min]	# Missed Cleavages
	High	NNLAGAEELFAR	1	6	1	Q68FD5		0	0	0.03594	3.20198	2	1304.66	0.70104	18.1076	0
	High	LLLPWLEAR	1	4	1	Q68FD5		0	0.001	0.1786	1.79028	2	1110.67	-0.340088	23.244	0
Q8BMR6	Putative uncharacterized protein (Fragment) OS=Mus musculus GN=Col3a1 PE=2 SV=1 - [Q8BMR6_MOUSE]	4.61576	9.17	10	2	2	2	218	24.4357	6.39209
	A2	Sequence	# PSMs	# Proteins	# Protein Groups	Protein Group Accessions	Modifications	ΔCn	q-Value	PEP	XCorr	Charge	MH+ [Da]	ΔM [ppm]	RT [min]	# Missed Cleavages
	High	FTYTVLEDGcTK	1	10	1	Q8BMR6	C10(Carbamidomethyl)	0	0	0.04523	2.89767	2	1433.66	-0.911869	16.2496	0
	High	TVFEYQTR	1	10	1	Q8BMR6		0	0.001	0.1358	1.71809	2	1043.51	-1.27595	13.0996	0
Q8C6Z2	Putative uncharacterized protein OS=Mus musculus GN=Nid2 PE=2 SV=1 - [Q8C6Z2_MOUSE]	4.44164	1.93	6	2	2	2	1294	141.111	5.30029
	A2	Sequence	# PSMs	# Proteins	# Protein Groups	Protein Group Accessions	Modifications	ΔCn	q-Value	PEP	XCorr	Charge	MH+ [Da]	ΔM [ppm]	RT [min]	# Missed Cleavages
	High	ITQTAEGLDPENYLSIK	1	5	1	Q8C6Z2		0	0	0.00737	4.44164	2	1891.96	-0.995303	19.7593	0
	High	AITVDPIR	1	6	1	Q8C6Z2		0	0.001	0.1439	1.5786	2	884.518	-1.97191	13.6752	0
E9Q3W4	Plectin OS=Mus musculus GN=Plec PE=1 SV=1 - [E9Q3W4_MOUSE]	4.16955	0.57	9	2	2	2	4386	498.801	5.68115
	A2	Sequence	# PSMs	# Proteins	# Protein Groups	Protein Group Accessions	Modifications	ΔCn	q-Value	PEP	XCorr	Charge	MH+ [Da]	ΔM [ppm]	RT [min]	# Missed Cleavages
	High	LTVDEAVR	1	9	1	E9Q3W4		0	0.001	0.1417	2.1123	2	902.494	0.098609	12.4411	0
	High	LPVDVAYQR	1	8	1	E9Q3W4		0	0.007	0.2574	2.05725	2	1060.58	-0.528741	14.1371	0
Q3TYT5	Putative uncharacterized protein OS=Mus musculus GN=Epb4.2 PE=2 SV=1 - [Q3TYT5_MOUSE]	3.98399	2.97	6	1	1	1	673	74.91	8.04541
	A2	Sequence	# PSMs	# Proteins	# Protein Groups	Protein Group Accessions	Modifications	ΔCn	q-Value	PEP	XCorr	Charge	MH+ [Da]	ΔM [ppm]	RT [min]	# Missed Cleavages
	High	SVLPIsQTQAAQEGALLYKR	1	6	1	Q3TYT5	S6(Phospho)	0	0.008	0.2764	3.98399	3	2253.16	-3.70571	18.9819	1
O89052	Alpha-tubulin (Fragment) OS=Mus musculus GN=Tuba1b PE=2 SV=1 - [O89052_MOUSE]	3.95916	15.15	5	1	1	1	99	10.9442	4.98291
	A2	Sequence	# PSMs	# Proteins	# Protein Groups	Protein Group Accessions	Modifications	ΔCn	q-Value	PEP	XCorr	Charge	MH+ [Da]	ΔM [ppm]	RT [min]	# Missed Cleavages
	High	AVFVDLEPTVIDEVR	1	5	1	O89052		0	0	0.005599	3.95916	2	1701.9	-0.681951	21.5927	0
Q6GQT1	Alpha-2-macroglobulin-P OS=Mus musculus GN=A2mp PE=2 SV=2 - [A2MP_MOUSE]	3.95747	0.88	1	1	1	1	1474	164.248	6.60986
	A2	Sequence	# PSMs	# Proteins	# Protein Groups	Protein Group Accessions	Modifications	ΔCn	q-Value	PEP	XCorr	Charge	MH+ [Da]	ΔM [ppm]	RT [min]	# Missed Cleavages
	High	mVSGFIPLKPTVK	1	1	1	Q6GQT1	M1(Oxidation)	0	0	0.01722	3.95747	2	1432.82	-0.955658	17.0628	0
P01027	Complement C3 OS=Mus musculus GN=C3 PE=1 SV=3 - [CO3_MOUSE]	3.32224	0.78	1	1	1	1	1663	186.366	6.72705
	A2	Sequence	# PSMs	# Proteins	# Protein Groups	Protein Group Accessions	Modifications	ΔCn	q-Value	PEP	XCorr	Charge	MH+ [Da]	ΔM [ppm]	RT [min]	# Missed Cleavages
	High	SSVAVPYVIVPLK	1	1	1	P01027		0	0	0.02198	3.32224	2	1371.82	-0.206208	20.5651	0
Q5SWU9	Acetyl-CoA carboxylase 1 OS=Mus musculus GN=Acaca PE=1 SV=1 - [ACACA_MOUSE]	3.26317	0.6	1	1	1	1	2345	265.088	6.39209
	A2	Sequence	# PSMs	# Proteins	# Protein Groups	Protein Group Accessions	Modifications	ΔCn	q-Value	PEP	XCorr	Charge	MH+ [Da]	ΔM [ppm]	RT [min]	# Missed Cleavages
	High	IGSFGPQEDLLFLR	1	1	1	Q5SWU9		0	0	0.005711	3.26317	2	1591.85	0.381343	22.7634	0
Q8CD04	Putative uncharacterized protein (Fragment) OS=Mus musculus GN=Gpc1 PE=2 SV=1 - [Q8CD04_MOUSE]	3.05014	5.76	3	1	1	1	295	31.944	6.88818
	A2	Sequence	# PSMs	# Proteins	# Protein Groups	Protein Group Accessions	Modifications	ΔCn	q-Value	PEP	XCorr	Charge	MH+ [Da]	ΔM [ppm]	RT [min]	# Missed Cleavages
	High	TPLTHALPGLSEQEGQK	1	3	1	Q8CD04		0	0	0.01627	3.05014	3	1805.94	1.56732	15.8374	0
P02463	Collagen alpha-1(IV) chain OS=Mus musculus GN=Col4a1 PE=2 SV=4 - [CO4A1_MOUSE]	3.0172	0.96	1	1	1	1	1669	160.579	8.23584
	A2	Sequence	# PSMs	# Proteins	# Protein Groups	Protein Group Accessions	Modifications	ΔCn	q-Value	PEP	XCorr	Charge	MH+ [Da]	ΔM [ppm]	RT [min]	# Missed Cleavages
	High	ILYHGYSLLYVQGNER	1	1	1	P02463		0	0	0.03493	3.0172	3	1924.99	-0.951202	18.7662	0
Q505D1	Serine/threonine-protein phosphatase 6 regulatory ankyrin repeat subunit A OS=Mus musculus GN=Ankrd28 PE=1 SV=1 - [ANR28_MOUSE]	2.97928	1.9	1	1	1	1	1053	112.826	6.26514
	A2	Sequence	# PSMs	# Proteins	# Protein Groups	Protein Group Accessions	Modifications	ΔCn	q-Value	PEP	XCorr	Charge	MH+ [Da]	ΔM [ppm]	RT [min]	# Missed Cleavages
	High	yGHELLINTLITSGADTAKR	1	1	1	Q505D1	Y1(Phospho)	0	0.001	0.1749	2.97928	3	2253.12	-4.05214	18.9288	1
Q9CPN9	Protein 2210010C04Rik OS=Mus musculus GN=2210010C04Rik PE=2 SV=1 - [Q9CPN9_MOUSE]	2.86606	4.86	2	1	1	1	247	26.405	7.92822
	A2	Sequence	# PSMs	# Proteins	# Protein Groups	Protein Group Accessions	Modifications	ΔCn	q-Value	PEP	XCorr	Charge	MH+ [Da]	ΔM [ppm]	RT [min]	# Missed Cleavages
	High	YVNWIQQTIAAN	1	2	1	Q9CPN9		0	0	0.03658	2.86606	2	1420.72	-0.522478	21.5804	0
Q3UEG7	Inter-alpha-trypsin inhibitor heavy chain H2 (Fragment) OS=Mus musculus GN=Itih2 PE=1 SV=1 - [Q3UEG7_MOUSE]	2.83547	5.75	4	2	2	2	452	50.7109	6.21436
	A2	Sequence	# PSMs	# Proteins	# Protein Groups	Protein Group Accessions	Modifications	ΔCn	q-Value	PEP	XCorr	Charge	MH+ [Da]	ΔM [ppm]	RT [min]	# Missed Cleavages
	High	IQPSGGTNINEALLR	1	4	1	Q3UEG7		0	0	0.01272	2.83547	2	1582.85	-1.41178	16.0471	0
	High	VQFELHYQEVK	1	4	1	Q3UEG7		0	0.006	0.2271	1.95602	3	1419.73	-0.137831	16.3196	0
Q3UYD0	Putative uncharacterized protein OS=Mus musculus GN=Utp14a PE=2 SV=1 - [Q3UYD0_MOUSE]	2.7745	2.09	2	1	1	1	767	87.2647	9.20264
	A2	Sequence	# PSMs	# Proteins	# Protein Groups	Protein Group Accessions	Modifications	ΔCn	q-Value	PEP	XCorr	Charge	MH+ [Da]	ΔM [ppm]	RT [min]	# Missed Cleavages
	High	NKKEQMISLqNLLTTR	1	2	1	Q3UYD0	Q10(Deamidated)	0	0.007	0.2684	2.7745	3	1918.04	-1.97793	18.6026	2
A8E1T6	M167 protein OS=Murid herpesvirus 1 (strain K181) GN=m167 PE=4 SV=1 - [A8E1T6_MUHVK]	2.72924	8.05	7	1	1	2	435	47.6717	9.65674
	A2	Sequence	# PSMs	# Proteins	# Protein Groups	Protein Group Accessions	Modifications	ΔCn	q-Value	PEP	XCorr	Charge	MH+ [Da]	ΔM [ppm]	RT [min]	# Missed Cleavages
	High	sTPnGcAWSATAAAGAGVLFGAVATAGLTLTLGPR	2	7	1	A8E1T6	S1(Phospho); N4(Deamidated); C6(Carbamidomethyl)	0	0.008	0.2751	2.72924	4	3368.65	3.48232	17.9774	0
Q3TS63	Putative uncharacterized protein (Fragment) OS=Mus musculus GN=Asap2 PE=2 SV=1 - [Q3TS63_MOUSE]	2.61808	1.43	7	1	1	1	559	61.7079	5.61768
	A2	Sequence	# PSMs	# Proteins	# Protein Groups	Protein Group Accessions	Modifications	ΔCn	q-Value	PEP	XCorr	Charge	MH+ [Da]	ΔM [ppm]	RT [min]	# Missed Cleavages
	High	EIISEVQR	1	7	1	Q3TS63		0	0.001	0.1175	2.61808	2	973.53	-1.10043	13.996	0
Q8C9Y7	Putative uncharacterized protein OS=Mus musculus GN=Ect2 PE=2 SV=1 - [Q8C9Y7_MOUSE]	2.61592	2.17	2	1	1	2	692	78.5277	5.63037
	A2	Sequence	# PSMs	# Proteins	# Protein Groups	Protein Group Accessions	Modifications	ΔCn	q-Value	PEP	XCorr	Charge	MH+ [Da]	ΔM [ppm]	RT [min]	# Missed Cleavages
	High	KSVSLLSLStPNsNR	2	2	1	Q8C9Y7	T10(Phospho); S13(Phospho)	0	0.007	0.2655	2.61592	3	1762.81	-2.72931	22.7022	1
Q80VW7	AT-hook-containing transcription factor OS=Mus musculus GN=Akna PE=2 SV=1 - [AKNA_MOUSE]	2.59964	1.71	1	1	1	1	1404	153.03	6.18896
	A2	Sequence	# PSMs	# Proteins	# Protein Groups	Protein Group Accessions	Modifications	ΔCn	q-Value	PEP	XCorr	Charge	MH+ [Da]	ΔM [ppm]	RT [min]	# Missed Cleavages
	High	QPSDSLGSTWEGDtEVPQPSILPK	1	1	1	Q80VW7	T14(Phospho)	0	0.006	0.232	2.59964	4	2648.21	0.0683862	23.7322	0
A2ALV7	Protein AI314180 (Fragment) OS=Mus musculus GN=AI314180 PE=4 SV=1 - [A2ALV7_MOUSE]	2.3751	1.01	2	1	1	1	1490	164.416	7.92822
	A2	Sequence	# PSMs	# Proteins	# Protein Groups	Protein Group Accessions	Modifications	ΔCn	q-Value	PEP	XCorr	Charge	MH+ [Da]	ΔM [ppm]	RT [min]	# Missed Cleavages
	High	AGEQLAPFLPQLVPR	1	2	1	A2ALV7		0	0.007	0.2527	2.3751	2	1635.92	-2.97911	22.6596	0
Q9QZ85	Interferon-inducible GTPase 1 OS=Mus musculus GN=Iigp1 PE=1 SV=2 - [IIGP1_MOUSE]	2.36363	4.84	1	1	1	1	413	47.5415	6.32861
	A2	Sequence	# PSMs	# Proteins	# Protein Groups	Protein Group Accessions	Modifications	ΔCn	q-Value	PEP	XCorr	Charge	MH+ [Da]	ΔM [ppm]	RT [min]	# Missed Cleavages
	High	yIQEFcLANGYLLPKNSFLK	1	1	1	Q9QZ85	Y1(Phospho); C6(Carbamidomethyl)	0	0.001	0.1202	2.36363	3	2498.22	0.0740922	25.4004	1
Q4VBE4	Pikachurin OS=Mus musculus GN=Egflam PE=1 SV=1 - [EGFLA_MOUSE]	2.35086	1.28	1	1	1	1	1017	110.665	7.12256
	A2	Sequence	# PSMs	# Proteins	# Protein Groups	Protein Group Accessions	Modifications	ΔCn	q-Value	PEP	XCorr	Charge	MH+ [Da]	ΔM [ppm]	RT [min]	# Missed Cleavages
	High	GLDPDTNYQFAVK	1	1	1	Q4VBE4		0	0	0.06	2.35086	2	1467.71	-1.59245	16.332	0
Q6IWE2	Beta-actin (Fragment) OS=Mus musculus GN=Actb PE=2 SV=1 - [Q6IWE2_MOUSE]	2.33596	20.78	35	1	1	1	77	8.5881	4.48779
	A2	Sequence	# PSMs	# Proteins	# Protein Groups	Protein Group Accessions	Modifications	ΔCn	q-Value	PEP	XCorr	Charge	MH+ [Da]	ΔM [ppm]	RT [min]	# Missed Cleavages
	High	SYELPDGQVITIGNER	1	35	1	Q6IWE2		0	0	0.05432	2.33596	2	1790.89	-1.28163	19.351	0
A4PBQ8	ABC transporter A subfamily member, A8a splicing variant 1 OS=Mus musculus GN=Abca8a PE=2 SV=1 - [A4PBQ8_MOUSE]	2.33271	1.07	4	1	1	1	1591	180.246	6.80029
	A2	Sequence	# PSMs	# Proteins	# Protein Groups	Protein Group Accessions	Modifications	ΔCn	q-Value	PEP	XCorr	Charge	MH+ [Da]	ΔM [ppm]	RT [min]	# Missed Cleavages
	High	FSPLtYYISAGVTRERK	1	4	1	A4PBQ8	T5(Phospho)	0	0.001	0.1808	2.33271	3	2068.03	-0.226903	17.4599	2
D3Z2M2	Symplekin (Fragment) OS=Mus musculus GN=Sympk PE=4 SV=1 - [D3Z2M2_MOUSE]	2.32696	5.05	7	1	1	1	198	22.1626	4.97021
	A2	Sequence	# PSMs	# Proteins	# Protein Groups	Protein Group Accessions	Modifications	ΔCn	q-Value	PEP	XCorr	Charge	MH+ [Da]	ΔM [ppm]	RT [min]	# Missed Cleavages
	High	LIAnLNmLLR	1	7	1	D3Z2M2	N4(Deamidated); M7(Oxidation)	0	0.002	0.1914	2.32696	2	1187.68	-3.7288	20.3383	0
Q6P2K8	Cep192 protein OS=Mus musculus GN=Cep192 PE=2 SV=1 - [Q6P2K8_MOUSE]	2.26656	1.41	5	1	1	1	640	71.4939	8.35303
	A2	Sequence	# PSMs	# Proteins	# Protein Groups	Protein Group Accessions	Modifications	ΔCn	q-Value	PEP	XCorr	Charge	MH+ [Da]	ΔM [ppm]	RT [min]	# Missed Cleavages
	High	FqLSGqSIR	1	5	1	Q6P2K8	Q2(Deamidated); Q6(Deamidated)	0	0	0.06616	2.26656	2	1037.52	-1.48189	14.1884	0
P29699	Alpha-2-HS-glycoprotein OS=Mus musculus GN=Ahsg PE=1 SV=1 - [FETUA_MOUSE]	2.24623	2.03	3	1	1	1	345	37.3017	6.50732
	A2	Sequence	# PSMs	# Proteins	# Protein Groups	Protein Group Accessions	Modifications	ΔCn	q-Value	PEP	XCorr	Charge	MH+ [Da]	ΔM [ppm]	RT [min]	# Missed Cleavages
	High	cNLLAEK	1	3	1	P29699	C1(Carbamidomethyl)	0	0.001	0.187	2.24623	2	847.433	-1.22865	12.1866	0
Q61509	Elongation factor 2 (Fragment) OS=Mus musculus GN=Eef2 PE=2 SV=1 - [Q61509_MOUSE]	2.19749	4.85	18	1	1	1	268	29.8701	6.63916
	A2	Sequence	# PSMs	# Proteins	# Protein Groups	Protein Group Accessions	Modifications	ΔCn	q-Value	PEP	XCorr	Charge	MH+ [Da]	ΔM [ppm]	RT [min]	# Missed Cleavages
	High	EGIPALDNFLDKL	1	18	1	Q61509		0	0.001	0.189	2.19749	2	1444.77	-1.39701	25.7903	1
Q61838	Alpha-2-macroglobulin OS=Mus musculus GN=A2m PE=1 SV=3 - [A2M_MOUSE]	2.16064	0.6	2	1	1	1	1495	165.748	6.68311
	A2	Sequence	# PSMs	# Proteins	# Protein Groups	Protein Group Accessions	Modifications	ΔCn	q-Value	PEP	XCorr	Charge	MH+ [Da]	ΔM [ppm]	RT [min]	# Missed Cleavages
	High	TVSWAVTPK	1	2	1	Q61838		0	0.001	0.09388	2.16064	2	988.545	-1.23494	14.504	0
Q3UR42	Putative uncharacterized protein (Fragment) OS=Mus musculus GN=Dhx9 PE=2 SV=1 - [Q3UR42_MOUSE]	1.97933	1.63	3	1	1	1	735	82.4186	5.23682
	A2	Sequence	# PSMs	# Proteins	# Protein Groups	Protein Group Accessions	Modifications	ΔCn	q-Value	PEP	XCorr	Charge	MH+ [Da]	ΔM [ppm]	RT [min]	# Missed Cleavages
	High	DINTDFLLVVLR	1	3	1	Q3UR42		0	0.007	0.2475	1.97933	2	1417.81	1.44105	26.4879	0
E9PVG8	Protein 9530053A07Rik OS=Mus musculus GN=9530053A07Rik PE=4 SV=1 - [E9PVG8_MOUSE]	1.95202	0.35	3	1	1	1	2581	280.044	6.17627
	A2	Sequence	# PSMs	# Proteins	# Protein Groups	Protein Group Accessions	Modifications	ΔCn	q-Value	PEP	XCorr	Charge	MH+ [Da]	ΔM [ppm]	RT [min]	# Missed Cleavages
	High	ISVINGGSK	1	3	1	E9PVG8		0	0.006	0.2318	1.95202	2	874.498	-1.44982	13.1967	0
Q3UEK3	Putative uncharacterized protein (Fragment) OS=Mus musculus GN=Eif3a PE=2 SV=1 - [Q3UEK3_MOUSE]	1.80443	2.22	6	1	1	1	677	79.6107	7.62061
	A2	Sequence	# PSMs	# Proteins	# Protein Groups	Protein Group Accessions	Modifications	ΔCn	q-Value	PEP	XCorr	Charge	MH+ [Da]	ΔM [ppm]	RT [min]	# Missed Cleavages
	High	LTSLVPFVDAFQLER	1	6	1	Q3UEK3		0	0.001	0.1429	1.80443	2	1734.94	-0.36841	24.9689	0
Q9EP78	Carbohydrate sulfotransferase 7 OS=Mus musculus GN=Chst7 PE=2 SV=1 - [CHST7_MOUSE]	0	1.45	1	1	1	1	484	54.7326	9.65674
	A2	Sequence	# PSMs	# Proteins	# Protein Groups	Protein Group Accessions	Modifications	ΔCn	q-Value	PEP	XCorr	Charge	MH+ [Da]	ΔM [ppm]	RT [min]	# Missed Cleavages
	High	ESIqVLR	1	1	1	Q9EP78	Q4(Deamidated)	0	0.007	0.262	1.05731	2	845.472	-0.628918	14.7744	0
P28665	Murinoglobulin-1 OS=Mus musculus GN=Mug1 PE=1 SV=3 - [MUG1_MOUSE]	0	0.54	1	1	1	1	1476	165.193	6.41748
	A2	Sequence	# PSMs	# Proteins	# Protein Groups	Protein Group Accessions	Modifications	ΔCn	q-Value	PEP	XCorr	Charge	MH+ [Da]	ΔM [ppm]	RT [min]	# Missed Cleavages
	High	FQVENSNR	1	1	1	P28665		0	0.001	0.1839	1.29659	2	993.474	-0.891531	10.9236	0
E9Q5L2	Inter alpha-trypsin inhibitor, heavy chain 4 OS=Mus musculus GN=Itih4 PE=4 SV=1 - [E9Q5L2_MOUSE]	0	0.86	3	1	1	1	925	102.759	6.3667
	A2	Sequence	# PSMs	# Proteins	# Protein Groups	Protein Group Accessions	Modifications	ΔCn	q-Value	PEP	XCorr	Charge	MH+ [Da]	ΔM [ppm]	RT [min]	# Missed Cleavages
	High	NVIFVIDK	1	3	1	E9Q5L2		0	0.006	0.2344	1.41036	2	947.555	-1.30244	17.4724	0
