# Supplementary material for: Heparan sulfates are critical regulators of the inhibitory megakaryocyte-platelet receptor G6b-B
Source: eLife. 2019 Aug 22;8:e46840. doi: 10.7554/eLife.46840 (PMC6742478; doi:10.7554/eLife.46840)
Supplement: Table 1—source data 2. [file elife-46840-table1-data2.xls]

## Sheet: Sheet1
Accession	Description	Score	Coverage	# Proteins	# Unique Peptides	# Peptides	# PSMs	# AAs	MW [kDa]	calc. pI
Q8R384	Myh11 protein OS=Mus musculus GN=Myh11 PE=2 SV=1 - [Q8R384_MOUSE]	728.385	54.36	16	2	122	206	1972	227.009	5.47803
	A2	Sequence	# PSMs	# Proteins	# Protein Groups	Protein Group Accessions	Modifications	ΔCn	q-Value	PEP	XCorr	Charge	MH+ [Da]	ΔM [ppm]	RT [min]	# Missed Cleavages
	High	IAQLEEELEEEQGNmEAmSDR	3	4	2	Q8R384;E9QPE7	M15(Oxidation); M18(Oxidation)	0	0	2.188e-09	6.71435	2	2483.06	0.785751	16.347	0
	High	DVASLGSQLQDTQELLQEETR	3	4	2	Q8R384;E9QPE7		0	0	1.126e-08	6.09433	3	2360.15	-1.55305	21.7569	0
	High	LQQLFNHTmFILEQEEYQR	1	12	4	Q80T68;Q8R384;Q8VDD5;E9QPE7	M9(Oxidation)	0	0	1.895e-11	5.99458	3	2483.2	-0.036487	20.1074	0
	High	LQNEVESVTGmLNEAEGK	2	4	2	Q8R384;E9QPE7	M11(Oxidation)	0	0	3.079e-10	5.96899	3	1963.93	-0.428341	16.5293	0
	High	TLLQEQLQAETELYAEAEEmR	2	3	2	Q8R384;E9QPE7	M20(Oxidation)	0	0	1.045e-09	5.70263	3	2511.18	-4.87962	22.1695	0
	High	QLLQANPILEAFGNAK	2	8	3	Q8R384;E9QPE7;Q8VDD5		0	0	5.426e-07	5.42789	2	1726.95	-0.397032	22.728	0
	High	mAQQmLDLEEQLEEEEAAR	2	4	2	Q8R384;E9QPE7	M1(Oxidation); M5(Oxidation)	0	0	7.662e-07	5.34546	3	2295.01	-1.25887	17.9987	0
	High	VIENTDGsEEEmDAR	1	3	1	Q8R384	S8(Phospho); M12(Oxidation)	0	0	0.001778	5.3132	2	1790.67	-3.32289	10.9962	0
	High	HTQAVEELTEQLEQFKR	1	4	2	Q8R384;E9QPE7		0	0	6.55e-13	5.27628	3	2086.05	-0.765837	21.3266	1
	High	MAQQmLDLEEQLEEEEAAR	6	4	2	Q8R384;E9QPE7	M5(Oxidation)	0	0	2.767e-08	5.18305	2	2279.01	-1.64512	18.4427	0
	High	LAKDVASLGSQLQDTQELLQEETR	1	4	2	Q8R384;E9QPE7		0	0	1.887e-10	5.14051	3	2672.37	-1.27033	21.4226	1
	High	NTDQASmPDNTAAQK	2	5	3	Q8R384;Q8VDD5;E9QPE7	M7(Oxidation)	0	0	4.195e-10	5.11695	2	1607.69	-1.11618	10.6728	0
	High	IRELEGHISDLQEDLDSER	1	4	2	Q8R384;E9QPE7		0	0	4.577e-09	5.10388	3	2254.1	0.43252	18.2554	1
	High	AEmEDLVSSKDDVGKNVHELEK	2	4	2	Q8R384;E9QPE7	M3(Oxidation)	0	0	1.944e-09	5.03494	3	2488.19	-0.472616	15.6612	2
	High	KmAQQmLDLEEQLEEEEAAR	1	4	2	Q8R384;E9QPE7	M2(Oxidation); M6(Oxidation)	0	0	4.508e-07	4.99793	3	2423.1	-2.87969	17.924	1
	High	ATLQAEQLSNELATER	2	4	2	Q8R384;E9QPE7		0	0	1.271e-11	4.96924	2	1773.9	-1.06527	16.6386	0
	High	TQLEELEDELQATEDAK	1	13	4	Q80T68;Q8VDD5;Q8R384;E9QPE7		0	0	4.035e-08	4.92102	2	1961.92	-0.650029	20.5986	0
	High	LQKEMEGLSQQYEEK	2	4	2	Q8R384;E9QPE7		0	0	7.733e-09	4.89824	3	1839.88	-1.06897	13.6982	1
	High	KLEDDILVMDDQNSK	2	4	2	Q8R384;E9QPE7		0	0	3.885e-08	4.86789	2	1762.85	-2.57373	16.9687	1
	High	SmLQDREDQSILcTGESGAGK	1	6	2	Q8R384;E9QPE7	M2(Oxidation); C13(Carbamidomethyl)	0	0	2.297e-09	4.85271	3	2298.03	-0.842822	13.9331	1
	High	IKKLEDDILVmDDQNSK	3	4	2	Q8R384;E9QPE7	M11(Oxidation)	0	0	0.00139	4.82933	2	2020.02	-1.22113	16.2047	2
	High	NmDPLNDNVTSLLNASSDK	1	4	2	Q8R384;E9QPE7	M2(Oxidation)	0	0	5.301e-05	4.81115	2	2063.96	1.55684	19.1127	0
	High	LEDDILVmDDQNSK	1	4	2	Q8R384;E9QPE7	M8(Oxidation)	0	0	4.042e-09	4.8089	2	1650.75	-0.85169	15.1025	0
	High	VSDLTTNLAEEEEK	1	4	2	Q8R384;E9QPE7		0	0	2.256e-10	4.71743	2	1577.75	-0.673073	14.3179	0
	High	VIENTDGsEEEMDAR	1	3	1	Q8R384	S8(Phospho)	0	0	0.001276	4.70736	2	1774.68	-1.67837	11.9721	0
	High	SmLQDREDqSILcTGESGAGKTENTK	2	5	2	Q8R384;E9QPE7	M2(Oxidation); Q9(Deamidated); C13(Carbamidomethyl)	0	0	2.514e-05	4.69766	3	2872.32	9.232	14.2215	2
	High	NTDQASMPDNTAAQK	1	5	3	Q8R384;Q8VDD5;E9QPE7		0	0	1.354e-09	4.67011	2	1591.7	-3.55519	10.7437	0
	High	QLLQANPILEAFGnAK	2	8	3	Q8R384;E9QPE7;Q8VDD5	N14(Deamidated)	0	0	2.361e-09	4.63021	2	1727.94	2.77805	22.6856	0
	High	LQKEmEGLSQQYEEK	2	4	2	Q8R384;E9QPE7	M5(Oxidation)	0	0	1.973e-06	4.58044	2	1855.87	-1.50266	11.6283	1
	High	ITDVImAFQAmcR	2	4	2	Q8R384;E9QPE7	M6(Oxidation); M11(Oxidation); C12(Carbamidomethyl)	0	0	2.494e-07	4.57796	2	1587.73	-0.101834	18.1773	0
	High	LQQELDDLVVDLDNQR	2	4	2	Q8R384;E9QPE7		0	0	1.074e-07	4.56583	2	1912.96	-2.63938	21.0897	0
	High	VEDmAELTcLNEASVLHNLR	1	4	2	Q8R384;E9QPE7	M4(Oxidation); C9(Carbamidomethyl)	0	0	6.057e-11	4.56411	3	2330.1	-3.17545	19.6288	0
	High	ALEEALEAKEELER	2	4	2	Q8R384;E9QPE7		0	0	2.717e-08	4.50149	2	1629.83	0.196537	15.9058	1
	High	SGKLDAFLVLEQLR	2	4	2	Q8R384;E9QPE7		0	0	1.13e-07	4.47555	2	1588.9	-2.29976	23.4074	1
	High	HVSTLNIQLSDSK	2	4	2	Q8R384;E9QPE7		0	0	1.733e-05	4.46584	2	1441.76	-0.513091	15.0268	0
	High	LEDDILVMDDQNSK	1	4	2	Q8R384;E9QPE7		0	0	1.733e-05	4.44915	2	1634.75	-2.17846	17.2872	0
	High	LQDFASTIEVmEEGK	1	4	2	Q8R384;E9QPE7	M11(Oxidation)	0	0	0.0001642	4.41114	2	1712.8	-0.914317	16.9435	0
	High	VVSSVLQLGNIVFK	2	4	2	Q8R384;E9QPE7		0	0	9.356e-08	4.39042	2	1502.89	-0.696853	23.1431	0
	High	ELEGHISDLQEDLDSER	2	4	2	Q8R384;E9QPE7		0	0	0.0001251	4.3585	2	1984.91	-0.758079	16.8906	0
	High	IAQLEEQVEQEAR	1	4	2	Q8R384;E9QPE7		0	0	2.361e-07	4.35321	2	1542.78	-0.458406	14.83	0
	High	QADLEKEELAEELASSLSGR	2	4	2	Q8R384;E9QPE7		0	0	1.075e-05	4.35034	3	2175.08	-0.192028	20.9373	1
	High	SmLQDREDQSILcTGESGAGKTENTK	2	5	2	Q8R384;E9QPE7	M2(Oxidation); C13(Carbamidomethyl)	0	0	1.85e-08	4.34179	4	2871.31	-0.566361	14.1915	2
	High	SKQTLEKENADLAGELR	2	4	2	Q8R384;E9QPE7		0	0	1.376e-06	4.3365	2	1901.99	-0.16407	16.2139	2
	High	NFmNSPmAQADWVAK	1	4	2	Q8R384;E9QPE7	M3(Oxidation); M7(Oxidation)	0	0	6.048e-07	4.31685	2	1741.77	-0.122782	14.8663	0
	High	TGVLAHLEEERDLK	1	4	2	Q8R384;E9QPE7		0	0	6.841e-05	4.30988	2	1609.85	-1.18311	17.306	1
	High	GQLSDDEKFLFVDK	2	4	2	Q8R384;E9QPE7		0	0	2.893e-06	4.26638	2	1640.81	-1.57043	18.7595	1
	High	LQDFASTIEVMEEGK	1	4	2	Q8R384;E9QPE7		0	0	9.959e-06	4.22135	2	1696.81	-1.18598	20.6274	0
	High	LRLEVNMQALK	1	4	2	Q8R384;E9QPE7		0	0	1.634e-06	4.21876	3	1314.76	-0.418603	18.4019	1
	High	HVSTLNIQLSDSKK	1	4	2	Q8R384;E9QPE7		0	0	6.837e-05	4.21178	3	1569.86	-0.984775	15.2818	1
	High	LKEVLLQVEDER	2	4	2	Q8R384;E9QPE7		0	0	1.336e-06	4.21079	2	1470.82	-0.650037	16.6113	1
	High	SLEADLmQLQEDLAAAER	1	4	2	Q8R384;E9QPE7	M7(Oxidation)	0	0	7.713e-08	4.21042	2	2018.97	-2.05966	25.6103	0
	High	mLKAEmEDLVSSKDDVGK	1	4	2	Q8R384;E9QPE7	M1(Oxidation); M6(Oxidation)	0	0	4.433e-07	4.16125	3	2026.97	-0.272497	13.27	2
	High	QEEEMQAKEEEmQK	1	4	2	Q8R384;E9QPE7	M12(Oxidation)	0	0	0.00134	4.15503	3	1782.75	-2.35442	10.6933	1
	High	VSDLTTNLAEEEEKAK	1	4	2	Q8R384;E9QPE7		0	0	0.00199	4.13816	2	1776.88	-2.32071	14.6955	1
	High	IKKLEDDILVMDDQNSK	1	4	2	Q8R384;E9QPE7		0	0	0.0009227	4.1028	3	2004.03	0.0625111	18.3986	2
	High	VcHLVGINVTDFTR	2	4	2	Q8R384;E9QPE7	C2(Carbamidomethyl)	0	0	2.555e-09	4.03192	2	1630.84	0.466541	19.2025	0
	High	LDAFLVLEQLR	1	4	2	Q8R384;E9QPE7		0	0	9.824e-07	4.0076	2	1316.75	-2.47228	24.1372	0
	High	ITDVIMAFQAmcR	1	4	2	Q8R384;E9QPE7	M11(Oxidation); C12(Carbamidomethyl)	0	0	2.292e-08	3.97853	2	1571.74	-0.775171	19.4238	0
	High	LRLEVNmQALK	2	4	2	Q8R384;E9QPE7	M7(Oxidation)	0	0	0.0005578	3.97198	3	1330.75	-0.90375	15.3755	1
	High	ELDEATESNEAmGR	1	4	2	Q8R384;E9QPE7	M12(Oxidation)	0	0	1.523e-05	3.95725	2	1567.65	-1.89816	10.8717	0
	High	AEmEDLVSSKDDVGK	2	4	2	Q8R384;E9QPE7	M3(Oxidation)	0	0	0.0007811	3.95567	2	1638.75	-1.0875	11.4896	1
	High	LKEVLLQVEDERK	3	4	2	Q8R384;E9QPE7		0	0	0.002494	3.92074	2	1598.91	1.15843	16.8412	2
	High	QLHEYETELEDER	2	4	2	Q8R384;E9QPE7		0	0	2.514e-06	3.91773	3	1690.75	-2.13814	14.1793	0
	High	DKTEFSIIHYAGK	2	4	2	Q8R384;E9QPE7		0	0	1.357e-05	3.8971	2	1508.78	2.53486	17.1524	1
	High	NSLQDQLDEEMEAK	1	4	2	Q8R384;E9QPE7		0	0	1.38e-05	3.86328	2	1649.73	0.0473857	17.118	0
	High	QLEDERNSLQDQLDEEMEAK	1	4	2	Q8R384;E9QPE7		0	0	1.991e-06	3.84975	3	2420.09	0.748213	17.699	1
	High	NSLQDQLDEEmEAK	1	4	2	Q8R384;E9QPE7	M11(Oxidation)	0	0	0.0002147	3.84869	2	1665.73	-1.00423	13.6502	0
	High	AEMEDLVSSKDDVGK	2	4	2	Q8R384;E9QPE7		0	0	1.074e-06	3.82558	2	1622.75	-1.82461	13.8634	1
	High	TFHIFYYLLAGAK	2	4	2	Q8R384;E9QPE7		0	0	0.001962	3.8112	3	1543.83	-0.683517	24.5453	0
	High	EDQSILcTGESGAGK	1	16	4	Q80T68;Q8R384;E9QPE7;Q8VDD5	C7(Carbamidomethyl)	0	0	2.908e-05	3.80935	2	1551.69	-1.10205	12.8384	0
	High	KVIQYLAVVASSHK	1	3	2	Q8R384;E9QPE7		0	0	6.753e-07	3.79049	3	1542.9	-0.111283	18.2892	1
	High	VVSSVLQLGNIVFKK	1	4	2	Q8R384;E9QPE7		0	0	2.434e-05	3.78057	2	1630.99	-0.117781	22.0531	1
	High	HEmPPHIYAIADTAYR	1	4	2	Q8R384;E9QPE7	M3(Oxidation)	0	0	1.843e-05	3.75609	3	1900.9	-2.4777	17.7482	0
	High	QLEEAEEESQR	1	3	2	Q8R384;E9QPE7		0	0	3.473e-06	3.75597	2	1347.6	-2.62602	10.7556	0
	High	ELDEATESNEAMGR	1	4	2	Q8R384;E9QPE7		0	0	0.000541	3.7452	2	1551.66	-0.789296	11.8038	0
	High	QLEDERNSLQDQLDEEmEAK	1	4	2	Q8R384;E9QPE7	M17(Oxidation)	0	0	2.957e-06	3.74174	3	2436.08	-0.877417	14.9184	1
	High	LQDFASTIEVmEEGKK	1	4	2	Q8R384;E9QPE7	M11(Oxidation)	0	0	3.412e-06	3.73969	2	1840.9	-0.253522	16.293	1
	High	EmEGLSQQYEEK	1	4	2	Q8R384;E9QPE7	M2(Oxidation)	0	0	0.0002138	3.69962	2	1486.64	-0.103651	11.4066	0
	High	mAQQmLDLEEQLEEEEAARQK	1	4	2	Q8R384;E9QPE7	M1(Oxidation); M5(Oxidation)	0	0	0.0001517	3.67363	3	2551.17	0.811072	17.1553	1
	High	QKHTQAVEELTEQLEQFKR	3	4	2	Q8R384;E9QPE7		0	0	2.869e-05	3.65079	4	2342.21	-0.785887	24.3866	2
	High	SKHESmISELEVR	2	4	2	Q8R384;E9QPE7	M6(Oxidation)	0	0	0.0007313	3.61353	3	1560.77	-1.20933	15.5686	1
	High	mLKAEMEDLVSSKDDVGK	1	4	2	Q8R384;E9QPE7	M1(Oxidation)	0	0	8.1e-08	3.56923	3	2010.97	-2.77295	16.8659	2
	High	LEEEEDRGQQLQAERK	1	3	2	Q8R384;E9QPE7		0	0	3.631e-05	3.56563	3	1957.95	-2.29589	11.138	2
	High	QLHEYETELEDERK	2	4	2	Q8R384;E9QPE7		0	0	5.533e-05	3.53321	2	1818.85	-1.94622	14.3533	1
	High	FLFVDKNFmNSPmAQADWVAK	1	4	2	Q8R384;E9QPE7	M9(Oxidation); M13(Oxidation)	0	0	3.687e-08	3.52121	3	2491.18	-0.064783	19.9936	1
	High	QEEEmQAKEEEmQK	1	4	2	Q8R384;E9QPE7	M5(Oxidation); M12(Oxidation)	0	0	8.415e-07	3.51754	3	1798.74	-1.98356	10.6697	1
	High	VDYNASAWLTK	1	4	2	Q8R384;E9QPE7		0	0	2.227e-05	3.49581	2	1267.63	-0.87444	17.4677	0
	High	KEEELQAALAR	1	5	3	Q8R384;Q8VDD5;E9QPE7		0	0	6.827e-05	3.41607	2	1257.68	-1.32237	13.8788	1
	High	SKHESMISELEVR	1	4	2	Q8R384;E9QPE7		0	0	3.119e-06	3.40026	3	1544.77	-2.57757	18.7718	1
	High	ASRDEIFATSKENEK	2	4	2	Q8R384;E9QPE7		0	0	0.0008471	3.37707	2	1724.84	-3.69928	12.8257	2
	High	KQADLEKEELAEELASSLSGR	1	4	2	Q8R384;E9QPE7		0	0	0.0001339	3.36598	3	2303.17	-0.446047	21.8168	2
	High	VIQYLAVVASSHK	2	4	2	Q8R384;E9QPE7		0	0	5.816e-06	3.31304	2	1414.8	-1.10458	17.3418	0
	High	HTQAVEELTEQLEQFK	1	4	2	Q8R384;E9QPE7		0	0	4.71e-06	3.30625	3	1929.95	-0.804059	21.5926	0
	High	TEFSIIHYAGK	2	4	2	Q8R384;E9QPE7		0	0	0.002013	3.29114	2	1265.65	0.684715	16.7649	0
	High	QTLEKENADLAGELR	2	4	2	Q8R384;E9QPE7		0	0	0.005285	3.28273	2	1686.86	-0.736128	14.9399	1
	High	ALDEETRSHEAQVQEmR	1	4	2	Q8R384;E9QPE7	M16(Oxidation)	0	0	0.003765	3.27329	3	2044.93	-2.84497	11.2338	1
	High	LEVQLQDLQSK	1	4	2	Q8R384;E9QPE7		0	0	9.987e-05	3.26864	2	1300.71	-0.484884	15.986	0
	High	ALDEETRSHEAQVQEMR	1	4	2	Q8R384;E9QPE7		0	0	0.001421	3.26791	3	2028.94	0.251767	12.8288	1
	High	KLEVQLQDLQSK	2	4	2	Q8R384;E9QPE7		0	0	0.001204	3.24875	3	1428.8	-1.28333	15.7682	1
	High	KLEGDLKDLELQADSAIK	1	4	2	Q8R384;E9QPE7		0	0	3.208e-06	3.18004	3	1986.07	-1.59688	20.5145	2
	High	cNGVLEGIR	1	35	7	Q80T68;Q8R384;E9QPE7;B2RWX0;Q5SX39;G3UW82;Q8VDD5	C1(Carbamidomethyl)	0	0	0.000533	3.15418	2	1017.51	-0.909891	14.0172	0
	High	KQELEEILHEmEAR	2	4	2	Q8R384;E9QPE7	M11(Oxidation)	0	0	0.0003467	3.14477	2	1770.87	-2.33133	17.4796	1
	High	LEEEEDRGQQLQAER	1	3	2	Q8R384;E9QPE7		0	0	3.33e-06	3.13488	3	1829.86	-1.72318	11.1	1
	High	DLELQADSAIK	1	4	2	Q8R384;E9QPE7		0	0	0.007474	3.05529	2	1202.63	1.03089	15.4861	0
	High	EVLLQVEDER	1	4	2	Q8R384;E9QPE7		0	0	0.001501	2.98164	2	1229.64	-0.708471	15.3028	0
	High	QRYEILAANAIPK	1	4	2	Q8R384;E9QPE7		0	0	4.473e-06	2.94763	3	1486.84	-1.04016	17.2781	1
	High	YEILAANAIPK	2	4	2	Q8R384;E9QPE7		0	0	0.0008255	2.94213	2	1202.68	-0.994356	17.1956	0
	High	SHEAQVQEMR	2	4	2	Q8R384;E9QPE7		0	0	3.839e-06	2.89905	2	1214.56	-2.43369	10.8343	0
	High	NRLQQELDDLVVDLDNQR	1	4	2	Q8R384;E9QPE7		0	0	2.812e-05	2.86078	3	2183.1	-0.197343	25.4733	1
	High	LRQLEDERNSLQDQLDEEmEAK	1	4	2	Q8R384;E9QPE7	M19(Oxidation)	0	0	2.357e-05	2.83113	4	2705.26	-2.87421	16.7221	2
	High	QEEEMQAKEEEMQK	1	4	2	Q8R384;E9QPE7		0	0	1.627e-05	2.80866	3	1766.75	-1.79925	11.079	1
	High	LEVNMQALK	1	4	2	Q8R384;E9QPE7		0	0	0.001882	2.79149	2	1045.57	-0.475397	15.8696	0
	High	KVTVGKDDIQK	1	4	2	Q8R384;E9QPE7		0	0	0.000607	2.77684	3	1230.7	-0.666197	11.3156	2
	High	LKSTVAALEAK	1	4	2	Q8R384;E9QPE7		0	0	0.001466	2.71276	2	1130.68	-0.958557	12.9789	1
	High	MTESSLPSASK	1	4	2	Q8R384;E9QPE7		0	0	4.585e-05	2.6202	2	1137.54	-1.15352	11.2558	0
	High	ALEEALEAK	1	10	3	Q80T68;Q8R384;E9QPE7		0	0	0.002865	2.55848	2	973.519	-0.860411	12.9225	0
	High	GNEASFVPSR	1	3	1	Q8R384		0	0	0.002355	2.53799	2	1063.52	-1.12906	12.547	0
	High	KFDQLLAEEK	1	17	4	Q80T68;Q8R384;E9QPE7;Q8VDD5		0	0	0.0007236	2.52578	3	1220.65	-0.0221363	14.8388	1
	High	KLQDFASTIEVmEEGKK	1	4	2	Q8R384;E9QPE7	M12(Oxidation)	0	0	0.004777	2.48407	3	1968.99	-0.460488	17.4827	2
	High	EQADFAIEALAK	1	7	3	Q8R384;E9QPE7;Q8VDD5		0	0	0.004662	2.36768	2	1305.67	-0.619677	18.4982	0
	High	cnGVLEGIR	1	35	7	Q80T68;Q8R384;E9QPE7;B2RWX0;Q5SX39;G3UW82;Q8VDD5	C1(Carbamidomethyl); N2(Deamidated)	0	0	5.024e-05	2.34175	2	1018.5	-0.976018	14.6457	0
	High	HESmISELEVR	1	4	2	Q8R384;E9QPE7	M4(Oxidation)	0	0	0.003504	2.26404	2	1345.64	-0.768185	14.1294	0
	High	VKPLLQVTR	1	12	3	Q80T68;Q8R384;E9QPE7		0	0	0.003226	2.15231	2	1053.68	-0.84632	14.2668	0
	High	KQELEEILHEMEAR	1	4	2	Q8R384;E9QPE7		0	0	0.0001731	2.14516	3	1754.87	-2.02331	22.5964	1
	High	TGVLAHLEEER	2	4	2	Q8R384;E9QPE7		0	0	0.0004129	2.07064	3	1253.65	-0.875655	15.2007	0
	High	LQEVEGAVK	1	4	2	Q8R384;E9QPE7		0	0	0.0003705	2.04658	2	972.535	-1.28907	11.2582	0
	High	ALELDPNLYR	1	11	3	Q80T68;Q8R384;E9QPE7		0	0	0.0001543	2.02547	2	1203.63	-1.60016	17.7175	0
	High	AETELKELEQK	1	4	2	Q8R384;E9QPE7		0	0	0.004484	1.98219	3	1317.69	-0.324542	13.2144	1
	High	EMEGLSQQYEEK	1	4	2	Q8R384;E9QPE7		0	0.001	0.01173	3.47264	2	1470.64	-1.07231	12.7477	0
	High	FDQLLAEEK	1	17	4	Q80T68;Q8R384;E9QPE7;Q8VDD5		0	0.001	0.01209	2.96114	2	1092.56	0.741102	14.3297	0
	High	NSLQDQLDEEmEAKQNLER	1	4	2	Q8R384;E9QPE7	M11(Oxidation)	0	0.001	0.02756	2.75995	3	2306.05	-1.26721	15.17	1
	High	AAAYDKLEK	1	4	2	Q8R384;E9QPE7		0	0.001	0.009696	2.7005	2	1008.53	-1.41469	11.2535	1
	High	QQKAETELKELEQK	1	4	2	Q8R384;E9QPE7		0	0.001	0.03051	2.67912	3	1701.9	-0.252635	15.4308	2
	High	KDSSITGELEK	1	4	2	Q8R384;E9QPE7		0	0.001	0.01849	2.63452	2	1206.62	-2.03816	12.3366	1
	High	DDVGKNVHELEK	1	10	3	Q80T68;Q8R384;E9QPE7		0	0.001	0.01311	2.61995	3	1382.69	-1.80737	11.7569	1
	High	ENADLAGELR	1	4	2	Q8R384;E9QPE7		0	0.001	0.01279	2.46058	2	1087.54	-1.68542	13.4248	0
	High	STVAALEAK	1	4	2	Q8R384;E9QPE7		0	0.001	0.01125	2.27024	2	889.498	-1.26022	11.7224	0
	High	DSSITGELEK	1	4	2	Q8R384;E9QPE7		0	0.001	0.02114	2.22853	2	1078.53	-0.469961	13.1878	0
	High	cIIPNHEK	1	12	4	Q80T68;Q8R384;Q8VDD5;E9QPE7	C1(Carbamidomethyl)	0	0.001	0.009853	2.09127	2	1010.51	-1.60967	11.4327	0
	High	TVGQLYK	1	14	4	Q80T68;Q8R384;E9QPE7;Q8VDD5		0	0.001	0.01229	2.01339	2	808.456	-0.987476	11.6171	0
	High	LQDFASTIEVMEEGKK	1	4	2	Q8R384;E9QPE7		0	0.001	0.02697	1.94963	3	1824.9	-1.41072	19.585	1
	High	KLEDDILVmDDQnSK	2	4	2	Q8R384;E9QPE7	M9(Oxidation); N13(Deamidated)	0.0071	0.004	0.05419	2.78884	2	1779.82	-6.0061	15.0871	1
	High	mTESSLPSASK	1	4	2	Q8R384;E9QPE7	M1(Oxidation)	0	0.006	0.05476	2.6211	2	1153.54	-2.86706	10.7582	0
	High	VTVGKDDIQK	1	4	2	Q8R384;E9QPE7		0	0.007	0.09512	2.94491	2	1102.61	-2.47573	10.9095	1
	High	IAQLEEELEEEQGNmEAmSDRVR	1	4	2	Q8R384;E9QPE7	M15(Oxidation); M18(Oxidation)	0	0.007	0.09319	2.75614	3	2738.23	0.668758	16.5167	1
	High	SKLQEVEGAVK	1	4	2	Q8R384;E9QPE7		0	0.007	0.08215	2.73466	2	1187.66	-0.786694	12.8952	1
	High	AEmEDLVSSK	1	4	2	Q8R384;E9QPE7	M3(Oxidation)	0	0.007	0.08875	2.50405	2	1124.51	-2.24461	11.109	0
	High	KLLEER	1	14	2	Q8R384;E9QPE7		0	0.009	0.1058	1.97623	2	787.466	-1.31711	11.0973	1
E9QPE7	Myosin-11 OS=Mus musculus GN=Myh11 PE=1 SV=1 - [E9QPE7_MOUSE]	719.706	54.59	14	1	121	204	1938	223.219	5.50342
	A2	Sequence	# PSMs	# Proteins	# Protein Groups	Protein Group Accessions	Modifications	ΔCn	q-Value	PEP	XCorr	Charge	MH+ [Da]	ΔM [ppm]	RT [min]	# Missed Cleavages
	High	IAQLEEELEEEQGNmEAmSDR	3	4	2	Q8R384;E9QPE7	M15(Oxidation); M18(Oxidation)	0	0	2.188e-09	6.71435	2	2483.06	0.785751	16.347	0
	High	DVASLGSQLQDTQELLQEETR	3	4	2	Q8R384;E9QPE7		0	0	1.126e-08	6.09433	3	2360.15	-1.55305	21.7569	0
	High	LQQLFNHTmFILEQEEYQR	1	12	4	Q80T68;Q8R384;Q8VDD5;E9QPE7	M9(Oxidation)	0	0	1.895e-11	5.99458	3	2483.2	-0.036487	20.1074	0
	High	LQNEVESVTGmLNEAEGK	2	4	2	Q8R384;E9QPE7	M11(Oxidation)	0	0	3.079e-10	5.96899	3	1963.93	-0.428341	16.5293	0
	High	TLLQEQLQAETELYAEAEEmR	2	3	2	Q8R384;E9QPE7	M20(Oxidation)	0	0	1.045e-09	5.70263	3	2511.18	-4.87962	22.1695	0
	High	QLLQANPILEAFGNAK	2	8	3	Q8R384;E9QPE7;Q8VDD5		0	0	5.426e-07	5.42789	2	1726.95	-0.397032	22.728	0
	High	mAQQmLDLEEQLEEEEAAR	2	4	2	Q8R384;E9QPE7	M1(Oxidation); M5(Oxidation)	0	0	7.662e-07	5.34546	3	2295.01	-1.25887	17.9987	0
	High	HTQAVEELTEQLEQFKR	1	4	2	Q8R384;E9QPE7		0	0	6.55e-13	5.27628	3	2086.05	-0.765837	21.3266	1
	High	MAQQmLDLEEQLEEEEAAR	6	4	2	Q8R384;E9QPE7	M5(Oxidation)	0	0	2.767e-08	5.18305	2	2279.01	-1.64512	18.4427	0
	High	LAKDVASLGSQLQDTQELLQEETR	1	4	2	Q8R384;E9QPE7		0	0	1.887e-10	5.14051	3	2672.37	-1.27033	21.4226	1
	High	NTDQASmPDNTAAQK	2	5	3	Q8R384;Q8VDD5;E9QPE7	M7(Oxidation)	0	0	4.195e-10	5.11695	2	1607.69	-1.11618	10.6728	0
	High	IRELEGHISDLQEDLDSER	1	4	2	Q8R384;E9QPE7		0	0	4.577e-09	5.10388	3	2254.1	0.43252	18.2554	1
	High	AEmEDLVSSKDDVGKNVHELEK	2	4	2	Q8R384;E9QPE7	M3(Oxidation)	0	0	1.944e-09	5.03494	3	2488.19	-0.472616	15.6612	2
	High	KmAQQmLDLEEQLEEEEAAR	1	4	2	Q8R384;E9QPE7	M2(Oxidation); M6(Oxidation)	0	0	4.508e-07	4.99793	3	2423.1	-2.87969	17.924	1
	High	ATLQAEQLSNELATER	2	4	2	Q8R384;E9QPE7		0	0	1.271e-11	4.96924	2	1773.9	-1.06527	16.6386	0
	High	TQLEELEDELQATEDAK	1	13	4	Q80T68;Q8VDD5;Q8R384;E9QPE7		0	0	4.035e-08	4.92102	2	1961.92	-0.650029	20.5986	0
	High	LQKEMEGLSQQYEEK	2	4	2	Q8R384;E9QPE7		0	0	7.733e-09	4.89824	3	1839.88	-1.06897	13.6982	1
	High	KLEDDILVMDDQNSK	2	4	2	Q8R384;E9QPE7		0	0	3.885e-08	4.86789	2	1762.85	-2.57373	16.9687	1
	High	SmLQDREDQSILcTGESGAGK	1	6	2	Q8R384;E9QPE7	M2(Oxidation); C13(Carbamidomethyl)	0	0	2.297e-09	4.85271	3	2298.03	-0.842822	13.9331	1
	High	IKKLEDDILVmDDQNSK	3	4	2	Q8R384;E9QPE7	M11(Oxidation)	0	0	0.00139	4.82933	2	2020.02	-1.22113	16.2047	2
	High	NmDPLNDNVTSLLNASSDK	1	4	2	Q8R384;E9QPE7	M2(Oxidation)	0	0	5.301e-05	4.81115	2	2063.96	1.55684	19.1127	0
	High	LEDDILVmDDQNSK	1	4	2	Q8R384;E9QPE7	M8(Oxidation)	0	0	4.042e-09	4.8089	2	1650.75	-0.85169	15.1025	0
	High	VSDLTTNLAEEEEK	1	4	2	Q8R384;E9QPE7		0	0	2.256e-10	4.71743	2	1577.75	-0.673073	14.3179	0
	High	SmLQDREDqSILcTGESGAGKTENTK	2	5	2	Q8R384;E9QPE7	M2(Oxidation); Q9(Deamidated); C13(Carbamidomethyl)	0	0	2.514e-05	4.69766	3	2872.32	9.232	14.2215	2
	High	NTDQASMPDNTAAQK	1	5	3	Q8R384;Q8VDD5;E9QPE7		0	0	1.354e-09	4.67011	2	1591.7	-3.55519	10.7437	0
	High	QLLQANPILEAFGnAK	2	8	3	Q8R384;E9QPE7;Q8VDD5	N14(Deamidated)	0	0	2.361e-09	4.63021	2	1727.94	2.77805	22.6856	0
	High	LQKEmEGLSQQYEEK	2	4	2	Q8R384;E9QPE7	M5(Oxidation)	0	0	1.973e-06	4.58044	2	1855.87	-1.50266	11.6283	1
	High	ITDVImAFQAmcR	2	4	2	Q8R384;E9QPE7	M6(Oxidation); M11(Oxidation); C12(Carbamidomethyl)	0	0	2.494e-07	4.57796	2	1587.73	-0.101834	18.1773	0
	High	LQQELDDLVVDLDNQR	2	4	2	Q8R384;E9QPE7		0	0	1.074e-07	4.56583	2	1912.96	-2.63938	21.0897	0
	High	VEDmAELTcLNEASVLHNLR	1	4	2	Q8R384;E9QPE7	M4(Oxidation); C9(Carbamidomethyl)	0	0	6.057e-11	4.56411	3	2330.1	-3.17545	19.6288	0
	High	ALEEALEAKEELER	2	4	2	Q8R384;E9QPE7		0	0	2.717e-08	4.50149	2	1629.83	0.196537	15.9058	1
	High	SGKLDAFLVLEQLR	2	4	2	Q8R384;E9QPE7		0	0	1.13e-07	4.47555	2	1588.9	-2.29976	23.4074	1
	High	HVSTLNIQLSDSK	2	4	2	Q8R384;E9QPE7		0	0	1.733e-05	4.46584	2	1441.76	-0.513091	15.0268	0
	High	LEDDILVMDDQNSK	1	4	2	Q8R384;E9QPE7		0	0	1.733e-05	4.44915	2	1634.75	-2.17846	17.2872	0
	High	LQDFASTIEVmEEGK	1	4	2	Q8R384;E9QPE7	M11(Oxidation)	0	0	0.0001642	4.41114	2	1712.8	-0.914317	16.9435	0
	High	VVSSVLQLGNIVFK	2	4	2	Q8R384;E9QPE7		0	0	9.356e-08	4.39042	2	1502.89	-0.696853	23.1431	0
	High	ELEGHISDLQEDLDSER	2	4	2	Q8R384;E9QPE7		0	0	0.0001251	4.3585	2	1984.91	-0.758079	16.8906	0
	High	IAQLEEQVEQEAR	1	4	2	Q8R384;E9QPE7		0	0	2.361e-07	4.35321	2	1542.78	-0.458406	14.83	0
	High	QADLEKEELAEELASSLSGR	2	4	2	Q8R384;E9QPE7		0	0	1.075e-05	4.35034	3	2175.08	-0.192028	20.9373	1
	High	SmLQDREDQSILcTGESGAGKTENTK	2	5	2	Q8R384;E9QPE7	M2(Oxidation); C13(Carbamidomethyl)	0	0	1.85e-08	4.34179	4	2871.31	-0.566361	14.1915	2
	High	SKQTLEKENADLAGELR	2	4	2	Q8R384;E9QPE7		0	0	1.376e-06	4.3365	2	1901.99	-0.16407	16.2139	2
	High	NFmNSPmAQADWVAK	1	4	2	Q8R384;E9QPE7	M3(Oxidation); M7(Oxidation)	0	0	6.048e-07	4.31685	2	1741.77	-0.122782	14.8663	0
	High	TGVLAHLEEERDLK	1	4	2	Q8R384;E9QPE7		0	0	6.841e-05	4.30988	2	1609.85	-1.18311	17.306	1
	High	GQLSDDEKFLFVDK	2	4	2	Q8R384;E9QPE7		0	0	2.893e-06	4.26638	2	1640.81	-1.57043	18.7595	1
	High	LQDFASTIEVMEEGK	1	4	2	Q8R384;E9QPE7		0	0	9.959e-06	4.22135	2	1696.81	-1.18598	20.6274	0
	High	LRLEVNMQALK	1	4	2	Q8R384;E9QPE7		0	0	1.634e-06	4.21876	3	1314.76	-0.418603	18.4019	1
	High	HVSTLNIQLSDSKK	1	4	2	Q8R384;E9QPE7		0	0	6.837e-05	4.21178	3	1569.86	-0.984775	15.2818	1
	High	LKEVLLQVEDER	2	4	2	Q8R384;E9QPE7		0	0	1.336e-06	4.21079	2	1470.82	-0.650037	16.6113	1
	High	SLEADLmQLQEDLAAAER	1	4	2	Q8R384;E9QPE7	M7(Oxidation)	0	0	7.713e-08	4.21042	2	2018.97	-2.05966	25.6103	0
	High	mLKAEmEDLVSSKDDVGK	1	4	2	Q8R384;E9QPE7	M1(Oxidation); M6(Oxidation)	0	0	4.433e-07	4.16125	3	2026.97	-0.272497	13.27	2
	High	QEEEMQAKEEEmQK	1	4	2	Q8R384;E9QPE7	M12(Oxidation)	0	0	0.00134	4.15503	3	1782.75	-2.35442	10.6933	1
	High	VSDLTTNLAEEEEKAK	1	4	2	Q8R384;E9QPE7		0	0	0.00199	4.13816	2	1776.88	-2.32071	14.6955	1
	High	IKKLEDDILVMDDQNSK	1	4	2	Q8R384;E9QPE7		0	0	0.0009227	4.1028	3	2004.03	0.0625111	18.3986	2
	High	VcHLVGINVTDFTR	2	4	2	Q8R384;E9QPE7	C2(Carbamidomethyl)	0	0	2.555e-09	4.03192	2	1630.84	0.466541	19.2025	0
	High	LDAFLVLEQLR	1	4	2	Q8R384;E9QPE7		0	0	9.824e-07	4.0076	2	1316.75	-2.47228	24.1372	0
	High	ITDVIMAFQAmcR	1	4	2	Q8R384;E9QPE7	M11(Oxidation); C12(Carbamidomethyl)	0	0	2.292e-08	3.97853	2	1571.74	-0.775171	19.4238	0
	High	LRLEVNmQALK	2	4	2	Q8R384;E9QPE7	M7(Oxidation)	0	0	0.0005578	3.97198	3	1330.75	-0.90375	15.3755	1
	High	ELDEATESNEAmGR	1	4	2	Q8R384;E9QPE7	M12(Oxidation)	0	0	1.523e-05	3.95725	2	1567.65	-1.89816	10.8717	0
	High	AEmEDLVSSKDDVGK	2	4	2	Q8R384;E9QPE7	M3(Oxidation)	0	0	0.0007811	3.95567	2	1638.75	-1.0875	11.4896	1
	High	LKEVLLQVEDERK	3	4	2	Q8R384;E9QPE7		0	0	0.002494	3.92074	2	1598.91	1.15843	16.8412	2
	High	QLHEYETELEDER	2	4	2	Q8R384;E9QPE7		0	0	2.514e-06	3.91773	3	1690.75	-2.13814	14.1793	0
	High	DKTEFSIIHYAGK	2	4	2	Q8R384;E9QPE7		0	0	1.357e-05	3.8971	2	1508.78	2.53486	17.1524	1
	High	NSLQDQLDEEMEAK	1	4	2	Q8R384;E9QPE7		0	0	1.38e-05	3.86328	2	1649.73	0.0473857	17.118	0
	High	QLEDERNSLQDQLDEEMEAK	1	4	2	Q8R384;E9QPE7		0	0	1.991e-06	3.84975	3	2420.09	0.748213	17.699	1
	High	NSLQDQLDEEmEAK	1	4	2	Q8R384;E9QPE7	M11(Oxidation)	0	0	0.0002147	3.84869	2	1665.73	-1.00423	13.6502	0
	High	AEMEDLVSSKDDVGK	2	4	2	Q8R384;E9QPE7		0	0	1.074e-06	3.82558	2	1622.75	-1.82461	13.8634	1
	High	TFHIFYYLLAGAK	2	4	2	Q8R384;E9QPE7		0	0	0.001962	3.8112	3	1543.83	-0.683517	24.5453	0
	High	EDQSILcTGESGAGK	1	16	4	Q80T68;Q8R384;E9QPE7;Q8VDD5	C7(Carbamidomethyl)	0	0	2.908e-05	3.80935	2	1551.69	-1.10205	12.8384	0
	High	KVIQYLAVVASSHK	1	3	2	Q8R384;E9QPE7		0	0	6.753e-07	3.79049	3	1542.9	-0.111283	18.2892	1
	High	VVSSVLQLGNIVFKK	1	4	2	Q8R384;E9QPE7		0	0	2.434e-05	3.78057	2	1630.99	-0.117781	22.0531	1
	High	HEmPPHIYAIADTAYR	1	4	2	Q8R384;E9QPE7	M3(Oxidation)	0	0	1.843e-05	3.75609	3	1900.9	-2.4777	17.7482	0
	High	QLEEAEEESQR	1	3	2	Q8R384;E9QPE7		0	0	3.473e-06	3.75597	2	1347.6	-2.62602	10.7556	0
	High	ELDEATESNEAMGR	1	4	2	Q8R384;E9QPE7		0	0	0.000541	3.7452	2	1551.66	-0.789296	11.8038	0
	High	QLEDERNSLQDQLDEEmEAK	1	4	2	Q8R384;E9QPE7	M17(Oxidation)	0	0	2.957e-06	3.74174	3	2436.08	-0.877417	14.9184	1
	High	LQDFASTIEVmEEGKK	1	4	2	Q8R384;E9QPE7	M11(Oxidation)	0	0	3.412e-06	3.73969	2	1840.9	-0.253522	16.293	1
	High	EmEGLSQQYEEK	1	4	2	Q8R384;E9QPE7	M2(Oxidation)	0	0	0.0002138	3.69962	2	1486.64	-0.103651	11.4066	0
	High	mAQQmLDLEEQLEEEEAARQK	1	4	2	Q8R384;E9QPE7	M1(Oxidation); M5(Oxidation)	0	0	0.0001517	3.67363	3	2551.17	0.811072	17.1553	1
	High	QKHTQAVEELTEQLEQFKR	3	4	2	Q8R384;E9QPE7		0	0	2.869e-05	3.65079	4	2342.21	-0.785887	24.3866	2
	High	SKHESmISELEVR	2	4	2	Q8R384;E9QPE7	M6(Oxidation)	0	0	0.0007313	3.61353	3	1560.77	-1.20933	15.5686	1
	High	mLKAEMEDLVSSKDDVGK	1	4	2	Q8R384;E9QPE7	M1(Oxidation)	0	0	8.1e-08	3.56923	3	2010.97	-2.77295	16.8659	2
	High	LEEEEDRGQQLQAERK	1	3	2	Q8R384;E9QPE7		0	0	3.631e-05	3.56563	3	1957.95	-2.29589	11.138	2
	High	QLHEYETELEDERK	2	4	2	Q8R384;E9QPE7		0	0	5.533e-05	3.53321	2	1818.85	-1.94622	14.3533	1
	High	FLFVDKNFmNSPmAQADWVAK	1	4	2	Q8R384;E9QPE7	M9(Oxidation); M13(Oxidation)	0	0	3.687e-08	3.52121	3	2491.18	-0.064783	19.9936	1
	High	QEEEmQAKEEEmQK	1	4	2	Q8R384;E9QPE7	M5(Oxidation); M12(Oxidation)	0	0	8.415e-07	3.51754	3	1798.74	-1.98356	10.6697	1
	High	VDYNASAWLTK	1	4	2	Q8R384;E9QPE7		0	0	2.227e-05	3.49581	2	1267.63	-0.87444	17.4677	0
	High	KEEELQAALAR	1	5	3	Q8R384;Q8VDD5;E9QPE7		0	0	6.827e-05	3.41607	2	1257.68	-1.32237	13.8788	1
	High	SKHESMISELEVR	1	4	2	Q8R384;E9QPE7		0	0	3.119e-06	3.40026	3	1544.77	-2.57757	18.7718	1
	High	ASRDEIFATSKENEK	2	4	2	Q8R384;E9QPE7		0	0	0.0008471	3.37707	2	1724.84	-3.69928	12.8257	2
	High	KQADLEKEELAEELASSLSGR	1	4	2	Q8R384;E9QPE7		0	0	0.0001339	3.36598	3	2303.17	-0.446047	21.8168	2
	High	VIQYLAVVASSHK	2	4	2	Q8R384;E9QPE7		0	0	5.816e-06	3.31304	2	1414.8	-1.10458	17.3418	0
	High	HTQAVEELTEQLEQFK	1	4	2	Q8R384;E9QPE7		0	0	4.71e-06	3.30625	3	1929.95	-0.804059	21.5926	0
	High	TEFSIIHYAGK	2	4	2	Q8R384;E9QPE7		0	0	0.002013	3.29114	2	1265.65	0.684715	16.7649	0
	High	QTLEKENADLAGELR	2	4	2	Q8R384;E9QPE7		0	0	0.005285	3.28273	2	1686.86	-0.736128	14.9399	1
	High	ALDEETRSHEAQVQEmR	1	4	2	Q8R384;E9QPE7	M16(Oxidation)	0	0	0.003765	3.27329	3	2044.93	-2.84497	11.2338	1
	High	LEVQLQDLQSK	1	4	2	Q8R384;E9QPE7		0	0	9.987e-05	3.26864	2	1300.71	-0.484884	15.986	0
	High	ALDEETRSHEAQVQEMR	1	4	2	Q8R384;E9QPE7		0	0	0.001421	3.26791	3	2028.94	0.251767	12.8288	1
	High	KLEVQLQDLQSK	2	4	2	Q8R384;E9QPE7		0	0	0.001204	3.24875	3	1428.8	-1.28333	15.7682	1
	High	KLEGDLKDLELQADSAIK	1	4	2	Q8R384;E9QPE7		0	0	3.208e-06	3.18004	3	1986.07	-1.59688	20.5145	2
	High	cNGVLEGIR	1	35	7	Q80T68;Q8R384;E9QPE7;B2RWX0;Q5SX39;G3UW82;Q8VDD5	C1(Carbamidomethyl)	0	0	0.000533	3.15418	2	1017.51	-0.909891	14.0172	0
	High	KQELEEILHEmEAR	2	4	2	Q8R384;E9QPE7	M11(Oxidation)	0	0	0.0003467	3.14477	2	1770.87	-2.33133	17.4796	1
	High	LEEEEDRGQQLQAER	1	3	2	Q8R384;E9QPE7		0	0	3.33e-06	3.13488	3	1829.86	-1.72318	11.1	1
	High	DLELQADSAIK	1	4	2	Q8R384;E9QPE7		0	0	0.007474	3.05529	2	1202.63	1.03089	15.4861	0
	High	EVLLQVEDER	1	4	2	Q8R384;E9QPE7		0	0	0.001501	2.98164	2	1229.64	-0.708471	15.3028	0
	High	QRYEILAANAIPK	1	4	2	Q8R384;E9QPE7		0	0	4.473e-06	2.94763	3	1486.84	-1.04016	17.2781	1
	High	YEILAANAIPK	2	4	2	Q8R384;E9QPE7		0	0	0.0008255	2.94213	2	1202.68	-0.994356	17.1956	0
	High	SHEAQVQEMR	2	4	2	Q8R384;E9QPE7		0	0	3.839e-06	2.89905	2	1214.56	-2.43369	10.8343	0
	High	NRLQQELDDLVVDLDNQR	1	4	2	Q8R384;E9QPE7		0	0	2.812e-05	2.86078	3	2183.1	-0.197343	25.4733	1
	High	LRQLEDERNSLQDQLDEEmEAK	1	4	2	Q8R384;E9QPE7	M19(Oxidation)	0	0	2.357e-05	2.83113	4	2705.26	-2.87421	16.7221	2
	High	QEEEMQAKEEEMQK	1	4	2	Q8R384;E9QPE7		0	0	1.627e-05	2.80866	3	1766.75	-1.79925	11.079	1
	High	LEVNMQALK	1	4	2	Q8R384;E9QPE7		0	0	0.001882	2.79149	2	1045.57	-0.475397	15.8696	0
	High	KVTVGKDDIQK	1	4	2	Q8R384;E9QPE7		0	0	0.000607	2.77684	3	1230.7	-0.666197	11.3156	2
	High	LKSTVAALEAK	1	4	2	Q8R384;E9QPE7		0	0	0.001466	2.71276	2	1130.68	-0.958557	12.9789	1
	High	MTESSLPSASK	1	4	2	Q8R384;E9QPE7		0	0	4.585e-05	2.6202	2	1137.54	-1.15352	11.2558	0
	High	ALEEALEAK	1	10	3	Q80T68;Q8R384;E9QPE7		0	0	0.002865	2.55848	2	973.519	-0.860411	12.9225	0
	High	KFDQLLAEEK	1	17	4	Q80T68;Q8R384;E9QPE7;Q8VDD5		0	0	0.0007236	2.52578	3	1220.65	-0.0221363	14.8388	1
	High	KLQDFASTIEVmEEGKK	1	4	2	Q8R384;E9QPE7	M12(Oxidation)	0	0	0.004777	2.48407	3	1968.99	-0.460488	17.4827	2
	High	EQADFAIEALAK	1	7	3	Q8R384;E9QPE7;Q8VDD5		0	0	0.004662	2.36768	2	1305.67	-0.619677	18.4982	0
	High	cnGVLEGIR	1	35	7	Q80T68;Q8R384;E9QPE7;B2RWX0;Q5SX39;G3UW82;Q8VDD5	C1(Carbamidomethyl); N2(Deamidated)	0	0	5.024e-05	2.34175	2	1018.5	-0.976018	14.6457	0
	High	HESmISELEVR	1	4	2	Q8R384;E9QPE7	M4(Oxidation)	0	0	0.003504	2.26404	2	1345.64	-0.768185	14.1294	0
	High	VKPLLQVTR	1	12	3	Q80T68;Q8R384;E9QPE7		0	0	0.003226	2.15231	2	1053.68	-0.84632	14.2668	0
	High	KQELEEILHEMEAR	1	4	2	Q8R384;E9QPE7		0	0	0.0001731	2.14516	3	1754.87	-2.02331	22.5964	1
	High	TGVLAHLEEER	2	4	2	Q8R384;E9QPE7		0	0	0.0004129	2.07064	3	1253.65	-0.875655	15.2007	0
	High	LQEVEGAVK	1	4	2	Q8R384;E9QPE7		0	0	0.0003705	2.04658	2	972.535	-1.28907	11.2582	0
	High	ALELDPNLYR	1	11	3	Q80T68;Q8R384;E9QPE7		0	0	0.0001543	2.02547	2	1203.63	-1.60016	17.7175	0
	High	AETELKELEQK	1	4	2	Q8R384;E9QPE7		0	0	0.004484	1.98219	3	1317.69	-0.324542	13.2144	1
	High	LRGPPPQETSQ	1	1	1	E9QPE7		0	0.001	0.01931	3.88002	2	1209.62	-2.05248	10.7045	1
	High	EMEGLSQQYEEK	1	4	2	Q8R384;E9QPE7		0	0.001	0.01173	3.47264	2	1470.64	-1.07231	12.7477	0
	High	FDQLLAEEK	1	17	4	Q80T68;Q8R384;E9QPE7;Q8VDD5		0	0.001	0.01209	2.96114	2	1092.56	0.741102	14.3297	0
	High	NSLQDQLDEEmEAKQNLER	1	4	2	Q8R384;E9QPE7	M11(Oxidation)	0	0.001	0.02756	2.75995	3	2306.05	-1.26721	15.17	1
	High	AAAYDKLEK	1	4	2	Q8R384;E9QPE7		0	0.001	0.009696	2.7005	2	1008.53	-1.41469	11.2535	1
	High	QQKAETELKELEQK	1	4	2	Q8R384;E9QPE7		0	0.001	0.03051	2.67912	3	1701.9	-0.252635	15.4308	2
	High	KDSSITGELEK	1	4	2	Q8R384;E9QPE7		0	0.001	0.01849	2.63452	2	1206.62	-2.03816	12.3366	1
	High	DDVGKNVHELEK	1	10	3	Q80T68;Q8R384;E9QPE7		0	0.001	0.01311	2.61995	3	1382.69	-1.80737	11.7569	1
	High	ENADLAGELR	1	4	2	Q8R384;E9QPE7		0	0.001	0.01279	2.46058	2	1087.54	-1.68542	13.4248	0
	High	STVAALEAK	1	4	2	Q8R384;E9QPE7		0	0.001	0.01125	2.27024	2	889.498	-1.26022	11.7224	0
	High	DSSITGELEK	1	4	2	Q8R384;E9QPE7		0	0.001	0.02114	2.22853	2	1078.53	-0.469961	13.1878	0
	High	cIIPNHEK	1	12	4	Q80T68;Q8R384;Q8VDD5;E9QPE7	C1(Carbamidomethyl)	0	0.001	0.009853	2.09127	2	1010.51	-1.60967	11.4327	0
	High	TVGQLYK	1	14	4	Q80T68;Q8R384;E9QPE7;Q8VDD5		0	0.001	0.01229	2.01339	2	808.456	-0.987476	11.6171	0
	High	LQDFASTIEVMEEGKK	1	4	2	Q8R384;E9QPE7		0	0.001	0.02697	1.94963	3	1824.9	-1.41072	19.585	1
	High	KLEDDILVmDDQnSK	2	4	2	Q8R384;E9QPE7	M9(Oxidation); N13(Deamidated)	0.0071	0.004	0.05419	2.78884	2	1779.82	-6.0061	15.0871	1
	High	mTESSLPSASK	1	4	2	Q8R384;E9QPE7	M1(Oxidation)	0	0.006	0.05476	2.6211	2	1153.54	-2.86706	10.7582	0
	High	VTVGKDDIQK	1	4	2	Q8R384;E9QPE7		0	0.007	0.09512	2.94491	2	1102.61	-2.47573	10.9095	1
	High	IAQLEEELEEEQGNmEAmSDRVR	1	4	2	Q8R384;E9QPE7	M15(Oxidation); M18(Oxidation)	0	0.007	0.09319	2.75614	3	2738.23	0.668758	16.5167	1
	High	SKLQEVEGAVK	1	4	2	Q8R384;E9QPE7		0	0.007	0.08215	2.73466	2	1187.66	-0.786694	12.8952	1
	High	AEmEDLVSSK	1	4	2	Q8R384;E9QPE7	M3(Oxidation)	0	0.007	0.08875	2.50405	2	1124.51	-2.24461	11.109	0
	High	KLLEER	1	14	2	Q8R384;E9QPE7		0	0.009	0.1058	1.97623	2	787.466	-1.31711	11.0973	1
Q5SX39	Myosin-4 OS=Mus musculus GN=Myh4 PE=1 SV=1 - [MYH4_MOUSE]	587.141	56.58	20	38	109	170	1939	222.72	5.74463
	A2	Sequence	# PSMs	# Proteins	# Protein Groups	Protein Group Accessions	Modifications	ΔCn	q-Value	PEP	XCorr	Charge	MH+ [Da]	ΔM [ppm]	RT [min]	# Missed Cleavages
	High	ALQEAHQQTLDDLQAEEDKVNTLTK	3	7	3	B2RWX0;Q5SX39;G3UW82		0	0	6.513e-13	6.63823	3	2838.41	-1.58244	18.3954	1
	High	ELEEISERLEEAGGATSAQIEmNK	1	5	3	B2RWX0;Q5SX39;G3UW82	M22(Oxidation)	0	0	1.657e-08	6.37532	3	2650.25	-2.0264	18.2829	1
	High	TKLEQQVDDLEGSLEQEK	2	3	1	Q5SX39		0	0	3.913e-06	5.99158	2	2089.03	1.96632	18.9274	1
	High	LEEAGGATSAQIEmNK	1	5	3	B2RWX0;Q5SX39;G3UW82	M14(Oxidation)	0	0	2.494e-07	5.57153	2	1664.78	-0.132003	11.3859	0
	High	KKLETDISQIQGEmEDIVQEAR	3	7	3	B2RWX0;Q5SX39;G3UW82	M14(Oxidation)	0	0	2.621e-06	5.34018	3	2576.28	-1.71728	19.6161	2
	High	QAEEAEEQSNVNLAK	1	7	2	B2RWX0;Q5SX39		0	0	8.689e-09	5.29393	2	1659.78	-0.78443	11.3007	0
	High	NLQQEISDLTEQIAEGGK	2	8	3	B2RWX0;Q5SX39;G3UW82		0	0	3.42e-11	5.25541	2	1972.98	-1.14205	24.5971	0
	High	NDLQLQVQAEADGLADAEER	1	1	1	Q5SX39		0	0	1.951e-14	5.23402	2	2185.03	-1.20548	19.2212	0
	High	mQGTLEDQIISANPLLEAFGNAK	3	9	3	B2RWX0;Q5SX39;G3UW82	M1(Oxidation)	0	0	8.203e-07	5.14608	3	2476.23	-2.84286	25.273	0
	High	HADSVAELGEQIDNLQR	2	11	3	B2RWX0;Q5SX39;G3UW82		0	0	2.893e-13	5.11741	2	1894.92	-0.4344	18.2644	0
	High	LQDAEEHVEAVNSK	2	1	1	Q5SX39		0	0	1.261e-08	4.94941	2	1568.75	-1.85908	11.2056	0
	High	LEQQVDDLEGSLEQEKK	2	12	3	B2RWX0;Q5SX39;G3UW82		0	0	1.875e-07	4.8206	2	1987.98	-0.476197	15.6893	1
	High	DLEEATLQHEATAAALR	2	7	1	Q5SX39		0	0	2.224e-10	4.81494	2	1838.92	-0.999688	17.2503	0
	High	EQYEEEQEAKAELQR	1	3	2	B2RWX0;Q5SX39		0	0	2.263e-08	4.73604	2	1879.87	-0.0821774	13.2046	1
	High	TLAFLFSGGQAAEAEGGGGK	1	2	1	Q5SX39		0	0	2.862e-09	4.73463	2	1867.91	-2.58974	19.9999	0
	High	GQTVQQVYNSVGALAK	2	5	2	B2RWX0;Q5SX39		0	0	3.852e-06	4.72334	2	1662.88	-1.2433	17.7762	0
	High	KLETDISQIQGEmEDIVQEAR	1	7	3	B2RWX0;Q5SX39;G3UW82	M13(Oxidation)	0	0	3.05e-09	4.7151	3	2448.2	1.73274	18.4296	1
	High	NKDPLNETVVGLYQK	3	17	3	B2RWX0;Q5SX39;G3UW82		0	0	0.0004455	4.63938	2	1717.91	0.238554	17.449	1
	High	VVESmQSTLDAEIR	1	7	3	B2RWX0;Q5SX39;G3UW82	M5(Oxidation)	0	0	3.293e-09	4.53018	2	1593.78	-0.362904	13.752	0
	High	NAYEESLDQLETLKR	2	4	2	Q5SX39;G3UW82		0	0	1.567e-06	4.46144	2	1808.9	-1.64054	18.2861	1
	High	VQLLHTQNTSLINTK	2	9	3	B2RWX0;Q5SX39;G3UW82		0	0	5.244e-10	4.42316	2	1709.95	-0.354559	15.6027	0
	High	YKVLNASAIPEGQFIDSK	2	7	2	B2RWX0;Q5SX39		0	0	1.6e-08	4.36955	2	1980.04	-0.247879	18.2921	1
	High	VLNASAIPEGQFIDSK	1	8	2	B2RWX0;Q5SX39		0	0	1.583e-09	4.34562	2	1688.88	-0.672845	17.6133	0
	High	mEIDDLASNmETVSK	1	1	1	Q5SX39	M1(Oxidation); M10(Oxidation)	0	0	1.218e-09	4.33825	2	1714.75	-0.608661	13.2016	0
	High	IEDEQALGMQLQK	1	3	2	B2RWX0;Q5SX39		0	0	1.32e-06	4.31661	2	1502.75	-3.8995	15.3274	0
	High	NLTEEmAGLDENIAK	3	2	1	Q5SX39	M6(Oxidation)	0	0	5.672e-05	4.27424	2	1663.78	-0.859317	14.7205	0
	High	KLEDEcSELKK	1	15	3	B2RWX0;Q5SX39;G3UW82	C6(Carbamidomethyl)	0	0	8.621e-07	4.25287	3	1378.69	-0.0204602	11.415	2
	High	LQNEVEDLmIDVER	3	8	3	B2RWX0;Q5SX39;G3UW82	M9(Oxidation)	0	0	6.416e-05	4.24631	2	1718.83	2.52725	17.8964	0
	High	GKQAFTQQIEELKR	3	5	3	B2RWX0;Q5SX39;G3UW82		0	0	1.486e-05	4.24529	3	1675.91	-1.07972	16.8847	2
	High	LEEAGGATSAQIEMNK	1	5	3	B2RWX0;Q5SX39;G3UW82		0	0	2.591e-11	4.24214	2	1648.78	-2.40298	12.7447	0
	High	KALQEAHQQTLDDLQAEEDKVNTLTK	1	7	3	B2RWX0;Q5SX39;G3UW82		0	0	1.325e-05	4.2306	4	2966.5	-3.18497	19.7971	2
	High	AEDEEEINAELTAK	1	8	3	B2RWX0;Q5SX39;G3UW82		0	0	6.781e-09	4.20176	2	1561.72	-0.65437	14.2875	0
	High	QKYEETQAELEASQK	2	2	1	Q5SX39		0	0	1.408e-09	4.18087	2	1781.85	-1.29552	11.87	1
	High	IEELEEEIEAER	1	12	3	B2RWX0;Q5SX39;G3UW82		0	0	7.89e-05	4.16378	2	1488.71	-0.917291	16.4163	0
	High	LAQESTmDIENDKQQLDEK	2	3	1	Q5SX39	M7(Oxidation)	0	0	4.851e-06	4.14036	2	2251.04	-0.957419	12.4197	1
	High	EKSELKmEIDDLASNmETVSK	1	1	1	Q5SX39	M7(Oxidation); M16(Oxidation)	0	0	6.4e-10	4.13296	3	2429.14	-1.89443	18.1339	2
	High	LEQQVDDLEGSLEQEK	1	12	3	B2RWX0;Q5SX39;G3UW82		0	0	1.544e-06	4.1266	2	1859.89	0.606392	16.4313	0
	High	IEDEQALGmQLQK	2	3	2	B2RWX0;Q5SX39	M9(Oxidation)	0	0	9.612e-05	4.11282	3	1518.74	-1.78503	13.6473	0
	High	ENQSILITGESGAGK	1	18	3	B2RWX0;Q5SX39;G3UW82		0	0	1.353e-08	4.04118	2	1503.76	-0.121823	13.891	0
	High	LASADIETYLLEK	1	19	3	B2RWX0;Q5SX39;G3UW82		0	0	1.292e-07	4.00175	2	1465.78	1.73434	20.1712	0
	High	QIDQEKSELQASLEEAEASLEHEEGK	1	2	1	Q5SX39		0	0	0.0001221	3.99269	4	2927.37	-3.41746	22.8514	1
	High	MEIDDLASNmETVSK	1	1	1	Q5SX39	M10(Oxidation)	0	0	0.0002676	3.97958	2	1698.76	0.70376	15.1309	0
	High	NLTEEMAGLDENIAK	1	2	1	Q5SX39		0	0	0.0002782	3.95452	2	1647.78	-2.8424	18.6117	0
	High	TEGGATVTVKDDQVFSmNPPK	1	3	1	Q5SX39	M17(Oxidation)	0	0	4.581e-06	3.93216	3	2237.08	-0.118816	14.3743	1
	High	SELKmEIDDLASNmETVSK	1	1	1	Q5SX39	M5(Oxidation); M14(Oxidation)	0	0	4.971e-06	3.90257	3	2172	-0.349844	17.0423	1
	High	LDEAEQLALKGGK	1	18	3	B2RWX0;Q5SX39;G3UW82		0	0	7.691e-05	3.86546	2	1371.74	-4.04167	13.7097	1
	High	HDcDLLREQYEEEQEAKAELQR	1	3	2	B2RWX0;Q5SX39	C3(Carbamidomethyl)	0	0	1.129e-07	3.85679	4	2789.28	-1.20443	19.5051	2
	High	LQDLVDKLQTK	1	3	1	Q5SX39		0	0	4.303e-05	3.84924	2	1300.75	-0.401054	14.9941	1
	High	IAEKDEEIDQLKR	2	8	3	B2RWX0;Q5SX39;G3UW82		0	0	7.982e-06	3.84298	2	1586.84	-1.13041	12.9099	2
	High	GQDDLKEQLAmVER	2	2	1	Q5SX39	M11(Oxidation)	0	0	2.587e-06	3.82399	2	1647.8	-1.21535	15.4424	1
	High	VKNLTEEmAGLDENIAK	1	2	1	Q5SX39	M8(Oxidation)	0	0	5.082e-06	3.82224	3	1890.95	-0.052501	14.7233	1
	High	VIQYFATIAVTGDK	1	8	2	Q5SX39;G3UW82		0	0	2.172e-05	3.82111	2	1525.82	-3.78236	19.2734	0
	High	DIDDLELTLAK	1	17	3	B2RWX0;Q5SX39;G3UW82		0	0	9.795e-05	3.80933	2	1245.65	-2.11183	19.6596	0
	High	VRELENEVENEQKR	2	3	1	Q5SX39		0	0	1.083e-05	3.77482	3	1771.89	-0.479746	12.3665	2
	High	IEDEQALGmQLQKK	1	3	2	B2RWX0;Q5SX39	M9(Oxidation)	0	0	4.565e-06	3.7074	2	1646.84	0.196974	13.2786	1
	High	LLGSIDIDHTQYK	1	9	3	B2RWX0;Q5SX39;G3UW82		0	0	3.139e-05	3.67719	2	1502.78	-0.420515	16.1989	0
	High	KKHADSVAELGEQIDNLQR	3	11	3	B2RWX0;Q5SX39;G3UW82		0	0	1.788e-07	3.66877	3	2151.11	-0.785494	22.5932	2
	High	IQHELEEAEERADIAESQVNK	1	10	3	B2RWX0;Q5SX39;G3UW82		0	0	3.068e-05	3.65566	3	2438.18	-0.910948	17.3571	1
	High	KAITDAAmmAEELKK	1	19	3	B2RWX0;Q5SX39;G3UW82	M8(Oxidation); M9(Oxidation)	0	0	0.0004566	3.64837	3	1681.85	-1.82735	13.4421	2
	High	TKYETDAIQR	2	13	3	B2RWX0;Q5SX39;G3UW82		0	0	3.735e-05	3.62767	3	1224.62	-1.603	11.2168	1
	High	KGSSFQTVSALFR	1	11	3	B2RWX0;Q5SX39;G3UW82		0	0	0.0001189	3.62244	2	1427.76	-1.96193	20.0864	1
	High	ANLmQAEIEELR	1	2	1	Q5SX39	M4(Oxidation)	0	0	1.501e-05	3.59406	2	1432.71	-0.259581	15.8969	0
	High	SYHIFYQImSNK	1	7	2	B2RWX0;Q5SX39	M9(Oxidation)	0	0	0.003429	3.57478	2	1546.73	-0.801405	16.9806	0
	High	LHTESGEFSR	2	1	1	Q5SX39		0	0	5.643e-05	3.55112	3	1162.55	-1.26052	11.2664	0
	High	VKELTYQTEEDRK	1	11	3	B2RWX0;Q5SX39;G3UW82		0	0	0.004172	3.53907	2	1638.83	-1.25386	12.041	2
	High	IKELTERAEDEEEINAELTAK	1	1	1	Q5SX39		0	0	1.356e-05	3.49088	3	2431.22	0.838145	17.183	2
	High	AGLLGTLEEmRDEK	1	2	1	Q5SX39	M10(Oxidation)	0	0	0.00597	3.48942	2	1577.78	0.114709	16.6544	1
	High	KKEFEmSNLQSK	1	5	3	B2RWX0;Q5SX39;G3UW82	M6(Oxidation)	0	0	0.005263	3.48846	2	1484.74	-1.18181	11.5818	2
	High	ADIAESQVNK	1	19	3	B2RWX0;Q5SX39;G3UW82		0	0	0.004585	3.43563	2	1074.54	-2.25452	10.7894	0
	High	RDLEEATLQHEATAAALR	1	7	1	Q5SX39		0	0	1.398e-06	3.38402	3	1995.02	-1.31828	17.554	1
	High	VKNAYEESLDQLETLKR	1	2	1	Q5SX39		0	0	7.575e-07	3.37951	3	2036.07	-0.354409	19.8255	2
	High	mEGDLNEmEIQLNHANR	1	4	1	Q5SX39	M1(Oxidation); M8(Oxidation)	0	0	0.004655	3.36244	3	2045.9	-2.67315	13.518	0
	High	RESIFcIQYNVR	1	8	2	B2RWX0;Q5SX39	C6(Carbamidomethyl)	0	0	0.0007592	3.35769	3	1584.8	0.477847	18.8088	1
	High	LQNEVEDLMIDVER	1	8	3	G3UW82;B2RWX0;Q5SX39		0	0	0.0001641	3.34271	2	1702.84	2.14551	21.5048	0
	High	ANLMQAEIEELR	1	2	1	Q5SX39		0	0	0.0004449	3.31346	2	1416.72	0.456416	19.638	0
	High	LAQESTmDIEnDKQQLDEK	1	3	1	Q5SX39	M7(Oxidation); N11(Deamidated)	0	0	4.673e-06	3.3071	3	2252.02	-1.50822	11.7658	1
	High	QAFTQQIEELKR	2	6	3	B2RWX0;Q5SX39;G3UW82		0	0	0.001365	3.26578	3	1490.79	-1.81755	16.0042	1
	High	LTGAVMHYGNmK	1	11	3	B2RWX0;Q5SX39;G3UW82	M11(Oxidation)	0	0	1.824e-06	3.25018	2	1337.63	-0.574089	12.3636	0
	High	RVAEQELLDASER	2	2	1	Q5SX39		0	0	5.453e-07	3.18691	2	1515.77	-0.851945	14.5606	1
	High	cNGVLEGIR	1	35	7	Q80T68;Q8R384;E9QPE7;B2RWX0;Q5SX39;G3UW82;Q8VDD5	C1(Carbamidomethyl)	0	0	0.000533	3.15418	2	1017.51	-0.909891	14.0172	0
	High	NTQGmLKDTQLHLDDALR	2	2	1	Q5SX39	M5(Oxidation)	0	0	1.276e-05	3.13811	3	2085.04	-0.74356	17.4578	1
	High	ELTYQTEEDRK	1	13	3	B2RWX0;Q5SX39;G3UW82		0	0	0.004084	3.03761	2	1411.67	-1.75908	11.1562	1
	High	QLDEKDAMVSQLSR	2	1	1	Q5SX39		0	0	0.005671	3.00959	3	1619.8	-1.77779	14.7295	1
	High	QREEQAEPDGTEVADK	1	11	3	B2RWX0;Q5SX39;G3UW82		0	0	0.0001096	2.92766	3	1801.81	-2.90811	10.7667	1
	High	VAEQELLDASER	1	2	1	Q5SX39		0	0	0.000984	2.91446	2	1359.67	-0.916085	14.4038	0
	High	HDcDLLREQYEEEQEAK	2	3	2	B2RWX0;Q5SX39	C3(Carbamidomethyl)	0	0	0.002388	2.88024	3	2191.96	0.39648	14.9514	1
	High	DLEEATLQHEATAAALRK	1	7	1	Q5SX39		0	0	3.037e-06	2.84051	3	1967.02	-0.413568	17.0553	1
	High	TPGAmEHELVLHQLR	2	9	3	B2RWX0;Q5SX39;G3UW82	M5(Oxidation)	0	0	0.001381	2.83358	3	1746.9	0.254727	15.9568	0
	High	VGNEYVTK	1	21	3	B2RWX0;Q5SX39;G3UW82		0	0	0.0007743	2.83147	2	909.466	-2.22936	10.7976	0
	High	ANSEVAQWR	1	13	3	B2RWX0;Q5SX39;G3UW82		0	0	0.002189	2.80248	2	1060.52	-0.867898	12.4379	0
	High	TKLEQQVDDLEGSLEQEKK	3	3	1	Q5SX39		0	0	0.000755	2.78711	4	2217.12	-3.49973	19.0944	2
	High	LTGAVmHYGNmK	1	11	3	B2RWX0;Q5SX39;G3UW82	M6(Oxidation); M11(Oxidation)	0	0	0.001678	2.77982	2	1353.63	-1.86082	10.915	0
	High	KIQHELEEAEERADIAESQVNK	3	10	3	B2RWX0;Q5SX39;G3UW82		0	0	0.0008835	2.77685	4	2566.28	0.794405	19.753	2
	High	IQHELEEAEER	1	11	3	B2RWX0;Q5SX39;G3UW82		0	0	0.001708	2.73898	2	1382.65	-1.85447	11.5502	0
	High	GSSFQTVSALFR	2	11	3	B2RWX0;Q5SX39;G3UW82		0	0	3.162e-05	2.61726	2	1299.67	1.41329	20.186	0
	High	SNAAcAALDKK	1	2	1	Q5SX39	C5(Carbamidomethyl)	0	0	0.0006769	2.54323	3	1148.57	-1.84699	10.84	1
	High	KmEGDLNEMEIQLNHANR	1	4	1	Q5SX39	M2(Oxidation)	0	0	0.0007664	2.53231	3	2158	-1.49632	17.2595	1
	High	mFLWmVTR	1	11	3	B2RWX0;Q5SX39;G3UW82	M1(Oxidation); M5(Oxidation)	0	0	0.001898	2.49671	2	1115.54	0.168614	18.5332	0
	High	cnGVLEGIR	1	35	7	Q80T68;Q8R384;E9QPE7;B2RWX0;Q5SX39;G3UW82;Q8VDD5	C1(Carbamidomethyl); N2(Deamidated)	0	0	5.024e-05	2.34175	2	1018.5	-0.976018	14.6457	0
	High	ELENEVENEQKR	1	4	1	Q5SX39		0	0	0.004677	2.1782	2	1516.72	-1.32651	11.1622	1
	High	IEDmAmmTHLHEPAVLYNLK	1	8	3	B2RWX0;Q5SX39;G3UW82	M4(Oxidation); M6(Oxidation); M7(Oxidation)	0	0	0.002945	2.08504	4	2404.13	-1.82876	18.14	0
	High	SAETEKEmANmKEDFEK	2	2	1	Q5SX39	M8(Oxidation); M11(Oxidation)	0	0.001	0.02961	3.65857	2	2048.88	0.417287	11.1032	2
	High	AITDAAmmAEELKK	1	19	3	B2RWX0;Q5SX39;G3UW82	M7(Oxidation); M8(Oxidation)	0	0.001	0.008974	3.44053	2	1553.75	-0.555629	13.1345	1
	High	LDEAEQLALK	1	18	3	B2RWX0;Q5SX39;G3UW82		0	0.001	0.01523	3.41548	2	1129.61	0.79332	14.506	0
	High	TKYETDAIQRTEELEEAK	1	13	3	B2RWX0;Q5SX39;G3UW82		0	0.001	0.009141	3.36662	3	2154.06	1.19712	16.648	2
	High	KHADSVAELGEQIDNLQR	1	11	3	B2RWX0;Q5SX39;G3UW82		0	0.001	0.03112	3.03212	3	2023.01	-2.79666	19.3679	1
	High	DTQLHLDDALR	1	10	3	B2RWX0;Q5SX39;G3UW82		0	0.001	0.03906	2.96967	2	1296.65	-0.915842	15.797	0
	High	KmEGDLNEmEIQLNHANR	1	4	1	Q5SX39	M2(Oxidation); M9(Oxidation)	0	0.001	0.02903	2.96606	3	2173.99	-1.02733	13.9776	1
	High	LINELSTQK	1	1	1	Q5SX39		0	0.001	0.03996	2.9555	2	1045.59	-0.863702	12.3851	0
	High	IEAQNKPFDAK	1	11	2	B2RWX0;Q5SX39		0	0.001	0.008757	2.92941	2	1260.66	-2.49262	11.237	0
	High	mVALmQEK	1	3	2	B2RWX0;Q5SX39	M1(Oxidation); M5(Oxidation)	0	0.001	0.02097	2.46466	2	981.472	-2.63069	10.8229	0
	High	QLDEKDAmVSQLSR	2	1	1	Q5SX39	M8(Oxidation)	0	0.001	0.01025	2.34333	3	1635.8	-0.927872	12.3605	1
	High	VLNASAIPEGQFIDSKK	1	8	2	B2RWX0;Q5SX39		0	0.001	0.02251	2.33124	3	1816.98	1.01356	16.8351	1
	High	SELQASLEEAEASLEHEEGK	1	2	1	Q5SX39		0	0.001	0.02178	2.28902	3	2186.01	-1.37481	21.3366	0
	High	EFEmSNLQSK	1	5	3	B2RWX0;Q5SX39;G3UW82	M4(Oxidation)	0	0.001	0.01118	2.25153	2	1228.55	-1.03195	11.3038	0
	High	IQLELNQVK	1	9	3	B2RWX0;Q5SX39;G3UW82		0	0.001	0.03183	2.24291	2	1084.64	-0.6525	15.6	0
	High	LAQLITR	1	9	3	B2RWX0;Q5SX39;G3UW82		0	0.001	0.03701	2.07899	2	814.514	-0.646582	13.0441	0
	High	NALAHALQSAR	2	3	1	Q5SX39		0	0.001	0.02925	1.65548	3	1151.63	-0.270574	14.4516	0
	High	LAQESTMDIENDKQQLDEK	1	3	1	Q5SX39		0	0.006	0.05686	2.7016	3	2235.04	-0.487275	13.7461	1
	High	RANLmQAEIEELR	1	2	1	Q5SX39	M5(Oxidation)	0	0.007	0.09268	2.85791	3	1588.82	7.60379	15.8149	1
	High	LYEQHLGK	1	7	3	B2RWX0;Q5SX39;G3UW82		0	0.007	0.08518	2.29496	2	987.524	-1.44875	11.1799	0
	High	MVALMQEK	1	3	2	B2RWX0;Q5SX39		0	0.007	0.09875	1.84311	2	949.483	-1.73099	13.7577	0
Q8VDD5	Myosin-9 OS=Mus musculus GN=Myh9 PE=1 SV=4 - [MYH9_MOUSE]	513.68	51.99	13	83	104	152	1960	226.232	5.65576
	A2	Sequence	# PSMs	# Proteins	# Protein Groups	Protein Group Accessions	Modifications	ΔCn	q-Value	PEP	XCorr	Charge	MH+ [Da]	ΔM [ppm]	RT [min]	# Missed Cleavages
	High	IAQLEEELEEEQGNTELINDR	2	5	1	Q8VDD5		0	0	3.914e-08	6.45177	3	2472.18	0.884311	18.9734	0
	High	SmEAEmIQLQEELAAAER	2	5	1	Q8VDD5	M2(Oxidation); M6(Oxidation)	0	0	3.394e-08	6.27173	2	2080.95	0.475542	18.3644	0
	High	LQQLFNHTmFILEQEEYQR	1	12	4	Q80T68;Q8R384;Q8VDD5;E9QPE7	M9(Oxidation)	0	0	1.895e-11	5.99458	3	2483.2	-0.036487	20.1074	0
	High	DFSALESQLQDTQELLQEENR	2	3	1	Q8VDD5		0	0	7.578e-12	5.87419	3	2493.17	-1.82199	23.5424	0
	High	LQVELDSVTGLLSQSDSK	2	3	1	Q8VDD5		0	0	9.859e-13	5.62754	2	1919	-0.311559	21.1631	0
	High	IIGLDQVAGmSETALPGAFK	1	1	1	Q8VDD5	M10(Oxidation)	0	0	6.889e-08	5.44119	2	2034.06	-1.17049	20.5431	0
	High	QLLQANPILEAFGNAK	2	8	3	Q8R384;E9QPE7;Q8VDD5		0	0	5.426e-07	5.42789	2	1726.95	-0.397032	22.728	0
	High	mQQNIQELEEQLEEEESAR	2	2	1	Q8VDD5	M1(Oxidation)	0	0	4.294e-08	5.28832	2	2349.05	-2.33474	19.4364	0
	High	ANLQIDQINTDLNLER	2	5	1	Q8VDD5		0	0	9.431e-08	5.26961	2	1869.97	4.0029	19.0608	0
	High	NTDQASmPDNTAAQK	2	5	3	Q8R384;Q8VDD5;E9QPE7	M7(Oxidation)	0	0	4.195e-10	5.11695	2	1607.69	-1.11618	10.6728	0
	High	ELETQISELQEDLESER	2	2	1	Q8VDD5		0	0	2.217e-06	5.05952	2	2047.97	1.74375	20.9405	0
	High	LEEDQIImEDQNcK	1	2	1	Q8VDD5	M8(Oxidation); C13(Carbamidomethyl)	0	0	2.508e-08	4.99561	2	1780.77	-0.551511	13.5612	0
	High	ALEQQVEEmKTQLEELEDELQATEDAK	1	4	1	Q8VDD5	M9(Oxidation)	0	0	1.015e-08	4.98191	3	3163.48	-0.623911	22.7339	1
	High	HSQAVEELADQLEQTKR	2	2	1	Q8VDD5		0	0	1.258e-09	4.96174	3	1981.99	-3.98906	18.3585	1
	High	KLEEDQIImEDQNcK	2	2	1	Q8VDD5	M9(Oxidation); C14(Carbamidomethyl)	0	0	1.327e-10	4.94401	3	1908.86	-2.56755	13.178	1
	High	TQLEELEDELQATEDAK	1	13	4	Q80T68;Q8VDD5;Q8R384;E9QPE7		0	0	4.035e-08	4.92102	2	1961.92	-0.650029	20.5986	0
	High	VISGVLQLGNIAFK	1	1	1	Q8VDD5		0	0	1.643e-10	4.9102	2	1458.87	-1.16033	21.9666	0
	High	KLEEDQIIMEDQNcK	1	2	1	Q8VDD5	C14(Carbamidomethyl)	0	0	0.0001839	4.72072	3	1892.87	-1.66423	14.5144	1
	High	NTDQASMPDNTAAQK	1	5	3	Q8R384;Q8VDD5;E9QPE7		0	0	1.354e-09	4.67011	2	1591.7	-3.55519	10.7437	0
	High	KKVEAQLQELQVK	2	2	1	Q8VDD5		0	0	5.36e-07	4.63364	3	1540.9	-0.987282	16.3885	2
	High	QLLQANPILEAFGnAK	2	8	3	Q8R384;E9QPE7;Q8VDD5	N14(Deamidated)	0	0	2.361e-09	4.63021	2	1727.94	2.77805	22.6856	0
	High	KVEAQLQELQVK	1	2	1	Q8VDD5		0	0	2.028e-08	4.62629	2	1412.81	-0.50616	14.9575	1
	High	LTEmETmQSQLmAEK	1	2	1	Q8VDD5	M4(Oxidation); M7(Oxidation); M12(Oxidation)	0	0	1.09e-09	4.62052	2	1817.79	-1.33637	11.2606	0
	High	ELEDATETADAmNR	1	5	1	Q8VDD5	M12(Oxidation)	0	0	1.753e-09	4.54553	2	1581.67	-1.51126	11.228	0
	High	VAEFTTNLmEEEEK	1	1	1	Q8VDD5	M9(Oxidation)	0	0	0.0001049	4.45255	2	1685.75	-1.769	14.8573	0
	High	QAQQERDELADEIANSSGK	2	5	1	Q8VDD5		0	0	1.663e-09	4.4194	3	2088.98	-1.71813	14.5389	1
	High	LQQELDDLLVDLDHQR	1	3	1	Q8VDD5		0	0	6.475e-06	4.39615	2	1949.99	-1.90772	22.4619	0
	High	NFINNPLAQADWAAK	1	5	1	Q8VDD5		0	0	0.0001428	4.38346	2	1672.84	-1.95555	20.165	0
	High	KmQQNIQELEEQLEEEESAR	1	2	1	Q8VDD5	M2(Oxidation)	0	0	1.336e-05	4.33863	3	2477.15	0.515817	19.384	1
	High	KANLQIDQINTDLNLER	1	5	1	Q8VDD5		0	0	9.271e-11	4.31648	3	1998.06	-1.02545	18.559	1
	High	ELEDATETADAMNR	1	5	1	Q8VDD5		0	0	0.0001384	4.29601	2	1565.67	-2.6694	12.9463	0
	High	IAQLEEQLDNETKER	1	5	1	Q8VDD5		0	0	4.724e-08	4.28444	2	1815.91	-1.61803	14.9303	1
	High	AKQTLENERGELANEVK	2	3	1	Q8VDD5		0	0	1.219e-07	4.276	2	1929	-1.12953	14.5662	2
	High	LTEMETmQSQLmAEK	2	2	1	Q8VDD5	M7(Oxidation); M12(Oxidation)	0	0	2.559e-09	4.22517	2	1801.8	-0.376463	12.579	0
	High	VAEFTTNLMEEEEK	1	1	1	Q8VDD5		0	0	3.275e-07	4.19175	2	1669.76	-1.46839	17.1679	0
	High	TLEDEAKTHEAQIQEMR	1	2	1	Q8VDD5		0	0	0.0002526	4.18111	3	2028.96	-1.49472	15.5558	1
	High	FLSNGHVTIPGQQDKDmFQETmEAmR	2	1	1	Q8VDD5	M17(Oxidation); M22(Oxidation); M25(Oxidation)	0	0	4.094e-05	4.14521	4	3058.36	-1.82693	16.098	1
	High	NSFREQLEEEEEAKR	1	2	1	Q8VDD5		0	0	0.0001752	4.12593	3	1893.89	-1.49796	15.2461	2
	High	LTEMETMQSQLmAEK	1	2	1	Q8VDD5	M12(Oxidation)	0	0	4.265e-06	4.03445	2	1785.8	-3.43237	16.0766	0
	High	KQELEEIcHDLEAR	2	2	1	Q8VDD5	C8(Carbamidomethyl)	0	0	5.071e-07	3.90131	2	1769.85	-1.00793	17.9178	1
	High	mEDGVGcLETAEEAK	1	2	1	Q8VDD5	M1(Oxidation); C7(Carbamidomethyl)	0	0	1.236e-08	3.8895	2	1654.69	-1.21133	13.5704	0
	High	LKNKHEAmITDLEER	1	2	1	Q8VDD5	M8(Oxidation)	0	0	0.0003952	3.85132	3	1842.94	0.0575893	17.5107	2
	High	EDQSILcTGESGAGK	1	16	4	Q80T68;Q8R384;E9QPE7;Q8VDD5	C7(Carbamidomethyl)	0	0	2.908e-05	3.80935	2	1551.69	-1.10205	12.8384	0
	High	KmEDGVGcLETAEEAK	2	2	1	Q8VDD5	M2(Oxidation); C8(Carbamidomethyl)	0	0	2.865e-06	3.78874	2	1782.79	0.861773	13.2847	1
	High	VRTELADKVTK	1	3	1	Q8VDD5		0	0	5.86e-05	3.76885	3	1259.73	-0.384134	12.0958	2
	High	IRELETQISELQEDLESER	1	2	1	Q8VDD5		0	0	3.671e-05	3.75181	3	2317.15	-0.707605	21.6455	1
	High	VAEFTTNLmEEEEKSK	1	1	1	Q8VDD5	M9(Oxidation)	0	0	6.677e-06	3.70587	2	1900.88	-0.822844	14.5299	1
	High	AGKLDPHLVLDQLR	2	8	2	Q80T68;Q8VDD5		0	0	1.196e-05	3.68349	2	1574.9	-1.14139	19.8406	1
	High	IAQLEEQLDNETK	1	5	1	Q8VDD5		0	0	1.916e-07	3.64951	2	1530.76	-0.376031	14.6705	0
	High	VEAQLQELQVK	1	2	1	Q8VDD5		0	0	1.633e-05	3.62622	2	1284.72	-0.462157	15.0211	0
	High	SmmQDREDQSILcTGESGAGK	1	2	1	Q8VDD5	M2(Oxidation); M3(Oxidation); C13(Carbamidomethyl)	0	0	5.409e-05	3.60804	3	2331.98	-0.957137	12.7869	1
	High	TVGQLYKEQLAK	1	1	1	Q8VDD5		0	0	3.876e-05	3.54065	2	1377.77	-0.415462	13.7844	1
	High	NLPIYSEEIVEmYK	1	4	1	Q8VDD5	M12(Oxidation)	0	0	0.001302	3.52502	2	1743.85	-0.715231	19.5788	0
	High	VISGVLQLGNIAFKK	1	1	1	Q8VDD5		0	0	4.318e-05	3.50491	2	1586.96	0.0106642	20.7401	1
	High	VSHLLGINVTDFTR	2	1	1	Q8VDD5		0	0	8.842e-07	3.4741	2	1571.85	-1.4945	20.332	0
	High	KEEELQAALAR	1	5	3	Q8R384;Q8VDD5;E9QPE7		0	0	6.827e-05	3.41607	2	1257.68	-1.32237	13.8788	1
	High	QLEEAEEEAQR	1	5	1	Q8VDD5		0	0	3.702e-06	3.40189	2	1331.6	-2.35479	10.9668	0
	High	RQLEEAEEEAQR	1	5	1	Q8VDD5		0	0	0.00121	3.33563	3	1487.71	-2.14752	11.1118	1
	High	QTLENERGELANEVK	1	3	1	Q8VDD5		0	0	0.0007031	3.27212	2	1729.87	-3.01797	13.5856	1
	High	ITDVIIGFQAccR	1	1	1	Q8VDD5	C11(Carbamidomethyl); C12(Carbamidomethyl)	0	0	4.843e-06	3.25807	2	1552.76	-0.605287	18.6486	0
	High	AGVLAHLEEER	2	7	2	Q80T68;Q8VDD5		0	0	0.001651	3.25578	2	1223.63	-3.65375	15.2307	0
	High	HEmPPHIYAITDTAYR	2	4	1	Q8VDD5	M3(Oxidation)	0	0	0.000357	3.23964	3	1930.9	-5.82191	17.7883	0
	High	ADFcIIHYAGK	2	8	2	Q80T68;Q8VDD5	C4(Carbamidomethyl)	0	0	0.001391	3.20602	2	1294.62	0.0079007	16.7499	0
	High	DLEAHIDTANK	1	5	1	Q8VDD5		0	0	0.0002897	3.19211	2	1226.6	-1.06814	11.8441	0
	High	cNGVLEGIR	1	35	7	Q80T68;Q8R384;E9QPE7;B2RWX0;Q5SX39;G3UW82;Q8VDD5	C1(Carbamidomethyl)	0	0	0.000533	3.15418	2	1017.51	-0.909891	14.0172	0
	High	DKADFcIIHYAGK	1	8	2	Q80T68;Q8VDD5	C6(Carbamidomethyl)	0	0	0.005025	3.12712	3	1537.74	-1.21416	16.9312	1
	High	NKHEAMITDLEER	1	2	1	Q8VDD5		0	0	0.00485	3.11865	3	1585.77	0.839747	16.4833	1
	High	ALEEAmEQKAELER	2	4	1	Q8VDD5	M6(Oxidation)	0	0	3.323e-05	3.07678	2	1662.8	-0.93251	11.8641	1
	High	VEEEEERcQYLQAEK	2	2	1	Q8VDD5	C8(Carbamidomethyl)	0	0	9.176e-07	3.06274	3	1939.87	-0.598782	12.1077	1
	High	EQLEEEEEAKR	1	2	1	Q8VDD5		0	0	0.0004028	3.00251	2	1389.65	-2.69557	10.784	1
	High	ImGIPEDEQmGLLR	1	1	1	Q8VDD5	M2(Oxidation); M10(Oxidation)	0	0	1.787e-06	2.95466	2	1633.79	-0.736897	16.3354	0
	High	THEAQIQEMR	1	2	1	Q8VDD5		0	0	0.001952	2.94518	2	1242.59	-1.04368	11.4383	0
	High	VDYKADEWLmK	2	8	2	Q80T68;Q8VDD5	M10(Oxidation)	0	0	0.0017	2.94485	3	1413.67	-0.954539	15.7911	1
	High	VKVNKDDIQK	1	5	1	Q8VDD5		0	0	0.003946	2.9031	2	1186.68	-1.3951	11.0821	2
	High	ALELDSNLYR	1	1	1	Q8VDD5		0	0	1.466e-05	2.90234	2	1193.62	-0.805449	16.508	0
	High	NmDPLNDNIATLLHQSSDK	1	1	1	Q8VDD5	M2(Oxidation)	0	0	0.003593	2.84109	3	2142.02	2.00042	19.7752	0
	High	GDLPFVVTR	1	5	1	Q8VDD5		0	0	0.0003065	2.77577	2	1003.56	0.805795	17.7515	0
	High	QIATLHAQVTDmKK	1	2	1	Q8VDD5	M12(Oxidation)	0	0	0.006125	2.72374	2	1599.85	-1.08933	12.5083	1
	High	LQKDLEGLSQR	2	3	1	Q8VDD5		0	0	0.0004454	2.71939	2	1286.7	-1.33197	12.7572	1
	High	LDPHLVLDQLR	2	8	2	Q80T68;Q8VDD5		0	0	0.0001292	2.69412	3	1318.75	0.266374	19.1313	0
	High	EmEAELEDERK	1	5	1	Q8VDD5	M2(Oxidation)	0	0	0.005037	2.56328	2	1394.61	-2.77592	10.7698	1
	High	KFDQLLAEEK	1	17	4	Q80T68;Q8R384;E9QPE7;Q8VDD5		0	0	0.0007236	2.52578	3	1220.65	-0.0221363	14.8388	1
	High	ASIAALEAK	1	5	1	Q8VDD5		0	0	0.000282	2.5221	2	873.503	-1.45062	13.0002	0
	High	EMEAELEDERK	1	5	1	Q8VDD5		0	0	0.001528	2.45874	2	1378.61	-1.00678	11.7048	1
	High	EMEAELEDER	1	5	1	Q8VDD5		0	0	0.004186	2.38783	2	1250.52	-0.524774	12.5001	0
	High	ImGIPEDEQMGLLR	1	1	1	Q8VDD5	M2(Oxidation)	0	0	0.0004371	2.38225	2	1617.8	-1.02007	18.3614	0
	High	EQADFAIEALAK	1	7	3	Q8R384;E9QPE7;Q8VDD5		0	0	0.004662	2.36768	2	1305.67	-0.619677	18.4982	0
	High	TEmEDLmSSKDDVGK	2	4	1	Q8VDD5	M3(Oxidation); M7(Oxidation)	0	0	0.0005212	2.35493	3	1716.73	-2.65512	10.7867	1
	High	LKDVLLQVEDERR	1	5	1	Q8VDD5		0	0	0.006317	2.35114	4	1612.9	-0.092545	17.8627	2
	High	cnGVLEGIR	1	35	7	Q80T68;Q8R384;E9QPE7;B2RWX0;Q5SX39;G3UW82;Q8VDD5	C1(Carbamidomethyl); N2(Deamidated)	0	0	5.024e-05	2.34175	2	1018.5	-0.976018	14.6457	0
	High	TEMEDLMSSKDDVGK	1	4	1	Q8VDD5		0	0	0.003789	1.95373	3	1684.74	-0.626939	14.805	1
	High	VIQYLAHVASSHK	1	10	2	Q80T68;Q8VDD5		0	0	0.001369	1.47777	3	1452.8	-0.231604	15.5284	0
	High	FLSnGHVTIPGQQDKDmFQETmEAmR	1	1	1	Q8VDD5	N4(Deamidated); M17(Oxidation); M22(Oxidation); M25(Oxidation)	0	0.001	0.01057	4.32324	3	3059.36	2.88397	16.1501	1
	High	AGVLAHLEEERDLK	1	7	2	Q80T68;Q8VDD5		0	0.001	0.01368	4.01632	2	1579.84	-0.625501	17.3669	1
	High	TEMEDLmSSKDDVGK	2	4	1	Q8VDD5	M7(Oxidation)	0	0.001	0.008536	3.0928	2	1700.73	-0.960793	12.1734	1
	High	FDQLLAEEK	1	17	4	Q80T68;Q8R384;E9QPE7;Q8VDD5		0	0.001	0.01209	2.96114	2	1092.56	0.741102	14.3297	0
	High	TDLLLEPYNK	1	1	1	Q8VDD5		0	0.001	0.03107	2.9489	2	1205.64	-1.00283	16.9967	0
	High	HEDELLAK	1	2	1	Q8VDD5		0	0.001	0.01352	2.9341	2	954.489	-0.520986	11.6026	0
	High	HEMPPHIYAITDTAYR	1	4	1	Q8VDD5		0	0.001	0.0281	2.8584	3	1914.91	-1.32255	18.1526	0
	High	QIATLHAQVTDmK	1	2	1	Q8VDD5	M12(Oxidation)	0	0.001	0.01963	2.84987	2	1471.75	-2.09698	12.2343	0
	High	ASREEILAQAK	2	5	1	Q8VDD5		0	0.001	0.009278	2.80075	2	1215.67	-1.00764	12.09	1
	High	DLEGLSQRLEEK	1	3	1	Q8VDD5		0	0.001	0.02246	2.66638	2	1416.73	0.765908	16.0378	1
	High	TELADKVTK	1	3	1	Q8VDD5		0	0.001	0.009248	2.66487	2	1004.56	-2.42818	10.8836	1
	High	ADEWLmK	1	8	2	Q80T68;Q8VDD5	M6(Oxidation)	0	0.001	0.03537	2.4481	2	908.419	0.307529	13.1166	0
	High	TDLLLEPYNKYR	1	1	1	Q8VDD5		0	0.001	0.01521	2.42994	2	1524.8	-1.28067	17.6403	1
	High	VAAYDKLEK	1	3	1	Q8VDD5		0	0.001	0.02467	2.21903	2	1036.57	-0.541442	11.5908	1
	High	NcAAYLR	1	2	1	Q8VDD5	C2(Carbamidomethyl)	0	0.001	0.01228	2.10945	2	867.414	-0.145532	11.5648	0
	High	cIIPNHEK	1	12	4	Q80T68;Q8R384;Q8VDD5;E9QPE7	C1(Carbamidomethyl)	0	0.001	0.009853	2.09127	2	1010.51	-1.60967	11.4327	0
	High	TVGQLYK	1	14	4	Q80T68;Q8R384;E9QPE7;Q8VDD5		0	0.001	0.01229	2.01339	2	808.456	-0.987476	11.6171	0
	High	VKPLLNSIR	1	2	1	Q8VDD5		0	0.001	0.0292	1.37005	2	1039.66	-0.598856	14.836	0
	High	YEILTPNSIPK	1	1	1	Q8VDD5		0	0.002	0.04081	3.05599	2	1274.7	0.0180266	17.0305	0
	High	NKHEAmITDLEER	1	2	1	Q8VDD5	M6(Oxidation)	0	0.003	0.04764	2.88434	2	1601.76	-1.1679	14.4364	1
	High	LKDVLLQVEDER	1	5	1	Q8VDD5		0	0.003	0.04967	2.29753	2	1456.8	0.282598	17.4767	1
	High	QRYEILTPNSIPK	1	1	1	Q8VDD5		0	0.004	0.05441	3.1556	2	1558.86	-0.319037	16.9777	1
	High	DLEGLSQR	1	3	1	Q8VDD5		0	0.004	0.05374	2.19143	2	917.468	-1.19173	12.4652	0
	High	ASREEILAQAKENEK	1	5	1	Q8VDD5		0	0.007	0.06931	3.39691	3	1715.89	-1.19376	13.0951	2
	High	ALEEAMEQKAELER	1	4	1	Q8VDD5		0	0.007	0.07047	2.95114	3	1646.8	-0.553629	14.5844	1
	High	GALALEEKR	1	5	1	Q8VDD5		0	0.007	0.08885	2.40802	2	986.562	-0.872674	11.8848	1
	High	ALEEAMEQK	1	4	1	Q8VDD5		0	0.007	0.09543	2.34057	2	1048.5	-0.958953	11.4599	0
	High	LQEMESAVK	1	5	1	Q8VDD5		0	0.007	0.09496	2.05219	2	1034.52	-0.596698	11.5531	0
B2RWX0	Myosin, heavy polypeptide 1, skeletal muscle, adult OS=Mus musculus GN=Myh1 PE=2 SV=1 - [B2RWX0_MOUSE]	446.144	47.32	19	10	88	128	1942	223.208	5.78271
	A2	Sequence	# PSMs	# Proteins	# Protein Groups	Protein Group Accessions	Modifications	ΔCn	q-Value	PEP	XCorr	Charge	MH+ [Da]	ΔM [ppm]	RT [min]	# Missed Cleavages
	High	ALQEAHQQTLDDLQAEEDKVNTLTK	3	7	3	B2RWX0;Q5SX39;G3UW82		0	0	6.513e-13	6.63823	3	2838.41	-1.58244	18.3954	1
	High	ELEEISERLEEAGGATSAQIEmNK	1	5	3	B2RWX0;Q5SX39;G3UW82	M22(Oxidation)	0	0	1.657e-08	6.37532	3	2650.25	-2.0264	18.2829	1
	High	DLEEATLQHEATAATLR	2	5	2	B2RWX0;G3UW82		0	0	1.381e-07	5.73121	2	1868.93	-1.34336	16.8628	0
	High	LEEAGGATSAQIEmNK	1	5	3	B2RWX0;Q5SX39;G3UW82	M14(Oxidation)	0	0	2.494e-07	5.57153	2	1664.78	-0.132003	11.3859	0
	High	KKLETDISQIQGEmEDIVQEAR	3	7	3	B2RWX0;Q5SX39;G3UW82	M14(Oxidation)	0	0	2.621e-06	5.34018	3	2576.28	-1.71728	19.6161	2
	High	QAEEAEEQSNVNLAK	1	7	2	B2RWX0;Q5SX39		0	0	8.689e-09	5.29393	2	1659.78	-0.78443	11.3007	0
	High	NLQQEISDLTEQIAEGGK	2	8	3	B2RWX0;Q5SX39;G3UW82		0	0	3.42e-11	5.25541	2	1972.98	-1.14205	24.5971	0
	High	mQGTLEDQIISANPLLEAFGNAK	3	9	3	B2RWX0;Q5SX39;G3UW82	M1(Oxidation)	0	0	8.203e-07	5.14608	3	2476.23	-2.84286	25.273	0
	High	HADSVAELGEQIDNLQR	2	11	3	B2RWX0;Q5SX39;G3UW82		0	0	2.893e-13	5.11741	2	1894.92	-0.4344	18.2644	0
	High	LEQQVDDLEGSLEQEKK	2	12	3	B2RWX0;Q5SX39;G3UW82		0	0	1.875e-07	4.8206	2	1987.98	-0.476197	15.6893	1
	High	EQYEEEQEAKAELQR	1	3	2	B2RWX0;Q5SX39		0	0	2.263e-08	4.73604	2	1879.87	-0.0821774	13.2046	1
	High	GQTVQQVYNSVGALAK	2	5	2	B2RWX0;Q5SX39		0	0	3.852e-06	4.72334	2	1662.88	-1.2433	17.7762	0
	High	KLETDISQIQGEmEDIVQEAR	1	7	3	B2RWX0;Q5SX39;G3UW82	M13(Oxidation)	0	0	3.05e-09	4.7151	3	2448.2	1.73274	18.4296	1
	High	NKDPLNETVVGLYQK	3	17	3	B2RWX0;Q5SX39;G3UW82		0	0	0.0004455	4.63938	2	1717.91	0.238554	17.449	1
	High	IKEVTERAEDEEEINAELTAK	1	7	2	B2RWX0;G3UW82		0	0	2.32e-06	4.62419	3	2417.2	-0.282916	16.5413	2
	High	LQDAEEHVEAVNAK	2	2	1	B2RWX0		0	0	2.033e-05	4.57837	2	1552.76	-0.832433	11.4472	0
	High	VVESmQSTLDAEIR	1	7	3	B2RWX0;Q5SX39;G3UW82	M5(Oxidation)	0	0	3.293e-09	4.53018	2	1593.78	-0.362904	13.752	0
	High	VQLLHTQNTSLINTK	2	9	3	B2RWX0;Q5SX39;G3UW82		0	0	5.244e-10	4.42316	2	1709.95	-0.354559	15.6027	0
	High	YKVLNASAIPEGQFIDSK	2	7	2	B2RWX0;Q5SX39		0	0	1.6e-08	4.36955	2	1980.04	-0.247879	18.2921	1
	High	VLNASAIPEGQFIDSK	1	8	2	B2RWX0;Q5SX39		0	0	1.583e-09	4.34562	2	1688.88	-0.672845	17.6133	0
	High	IEDEQALGMQLQK	1	3	2	B2RWX0;Q5SX39		0	0	1.32e-06	4.31661	2	1502.75	-3.8995	15.3274	0
	High	KLEDEcSELKK	1	15	3	B2RWX0;Q5SX39;G3UW82	C6(Carbamidomethyl)	0	0	8.621e-07	4.25287	3	1378.69	-0.0204602	11.415	2
	High	LQNEVEDLmIDVER	3	8	3	B2RWX0;Q5SX39;G3UW82	M9(Oxidation)	0	0	6.416e-05	4.24631	2	1718.83	2.52725	17.8964	0
	High	GKQAFTQQIEELKR	3	5	3	B2RWX0;Q5SX39;G3UW82		0	0	1.486e-05	4.24529	3	1675.91	-1.07972	16.8847	2
	High	LEEAGGATSAQIEMNK	1	5	3	B2RWX0;Q5SX39;G3UW82		0	0	2.591e-11	4.24214	2	1648.78	-2.40298	12.7447	0
	High	KALQEAHQQTLDDLQAEEDKVNTLTK	1	7	3	B2RWX0;Q5SX39;G3UW82		0	0	1.325e-05	4.2306	4	2966.5	-3.18497	19.7971	2
	High	NLTEEMAGLDETIAK	1	5	2	B2RWX0;G3UW82		0	0	5.392e-07	4.22475	2	1634.79	-2.18639	19.555	0
	High	AEDEEEINAELTAK	1	8	3	B2RWX0;Q5SX39;G3UW82		0	0	6.781e-09	4.20176	2	1561.72	-0.65437	14.2875	0
	High	IEELEEEIEAER	1	12	3	B2RWX0;Q5SX39;G3UW82		0	0	7.89e-05	4.16378	2	1488.71	-0.917291	16.4163	0
	High	LEQQVDDLEGSLEQEK	1	12	3	B2RWX0;Q5SX39;G3UW82		0	0	1.544e-06	4.1266	2	1859.89	0.606392	16.4313	0
	High	IEDEQALGmQLQK	2	3	2	B2RWX0;Q5SX39	M9(Oxidation)	0	0	9.612e-05	4.11282	3	1518.74	-1.78503	13.6473	0
	High	ENQSILITGESGAGK	1	18	3	B2RWX0;Q5SX39;G3UW82		0	0	1.353e-08	4.04118	2	1503.76	-0.121823	13.891	0
	High	LASADIETYLLEK	1	19	3	B2RWX0;Q5SX39;G3UW82		0	0	1.292e-07	4.00175	2	1465.78	1.73434	20.1712	0
	High	KIAEQELLDASER	2	7	2	B2RWX0;G3UW82		0	0	7.177e-08	3.99859	2	1501.78	-1.25199	15.2431	1
	High	NLTEEmAGLDETIAK	1	5	2	B2RWX0;G3UW82	M6(Oxidation)	0	0	9.267e-06	3.97716	2	1650.79	-1.08141	15.489	0
	High	LDEAEQLALKGGK	1	18	3	B2RWX0;Q5SX39;G3UW82		0	0	7.691e-05	3.86546	2	1371.74	-4.04167	13.7097	1
	High	HDcDLLREQYEEEQEAKAELQR	1	3	2	B2RWX0;Q5SX39	C3(Carbamidomethyl)	0	0	1.129e-07	3.85679	4	2789.28	-1.20443	19.5051	2
	High	IAEKDEEIDQLKR	2	8	3	B2RWX0;Q5SX39;G3UW82		0	0	7.982e-06	3.84298	2	1586.84	-1.13041	12.9099	2
	High	DIDDLELTLAK	1	17	3	B2RWX0;Q5SX39;G3UW82		0	0	9.795e-05	3.80933	2	1245.65	-2.11183	19.6596	0
	High	IEDEQALGmQLQKK	1	3	2	B2RWX0;Q5SX39	M9(Oxidation)	0	0	4.565e-06	3.7074	2	1646.84	0.196974	13.2786	1
	High	IKLEQQVDDLEGSLEQEK	1	4	2	B2RWX0;G3UW82		0	0	2.821e-09	3.68103	3	2101.06	-0.962514	19.4422	1
	High	LLGSIDIDHTQYK	1	9	3	B2RWX0;Q5SX39;G3UW82		0	0	3.139e-05	3.67719	2	1502.78	-0.420515	16.1989	0
	High	KKHADSVAELGEQIDNLQR	3	11	3	B2RWX0;Q5SX39;G3UW82		0	0	1.788e-07	3.66877	3	2151.11	-0.785494	22.5932	2
	High	IQHELEEAEERADIAESQVNK	1	10	3	B2RWX0;Q5SX39;G3UW82		0	0	3.068e-05	3.65566	3	2438.18	-0.910948	17.3571	1
	High	KAITDAAmmAEELKK	1	19	3	B2RWX0;Q5SX39;G3UW82	M8(Oxidation); M9(Oxidation)	0	0	0.0004566	3.64837	3	1681.85	-1.82735	13.4421	2
	High	TKYETDAIQR	2	13	3	B2RWX0;Q5SX39;G3UW82		0	0	3.735e-05	3.62767	3	1224.62	-1.603	11.2168	1
	High	KGSSFQTVSALFR	1	11	3	B2RWX0;Q5SX39;G3UW82		0	0	0.0001189	3.62244	2	1427.76	-1.96193	20.0864	1
	High	SYHIFYQImSNK	1	7	2	B2RWX0;Q5SX39	M9(Oxidation)	0	0	0.003429	3.57478	2	1546.73	-0.801405	16.9806	0
	High	VKELTYQTEEDRK	1	11	3	B2RWX0;Q5SX39;G3UW82		0	0	0.004172	3.53907	2	1638.83	-1.25386	12.041	2
	High	KKEFEmSNLQSK	1	5	3	B2RWX0;Q5SX39;G3UW82	M6(Oxidation)	0	0	0.005263	3.48846	2	1484.74	-1.18181	11.5818	2
	High	ADIAESQVNK	1	19	3	B2RWX0;Q5SX39;G3UW82		0	0	0.004585	3.43563	2	1074.54	-2.25452	10.7894	0
	High	RESIFcIQYNVR	1	8	2	B2RWX0;Q5SX39	C6(Carbamidomethyl)	0	0	0.0007592	3.35769	3	1584.8	0.477847	18.8088	1
	High	LQNEVEDLMIDVER	1	8	3	G3UW82;B2RWX0;Q5SX39		0	0	0.0001641	3.34271	2	1702.84	2.14551	21.5048	0
	High	QLDEKDSLVSQLSR	2	2	1	B2RWX0		0	0	8.597e-05	3.27567	2	1617.84	-0.996595	16.2298	1
	High	QAFTQQIEELKR	2	6	3	B2RWX0;Q5SX39;G3UW82		0	0	0.001365	3.26578	3	1490.79	-1.81755	16.0042	1
	High	LTGAVMHYGNmK	1	11	3	B2RWX0;Q5SX39;G3UW82	M11(Oxidation)	0	0	1.824e-06	3.25018	2	1337.63	-0.574089	12.3636	0
	High	LINELTAQR	1	4	1	B2RWX0		0	0	2.439e-05	3.22886	2	1057.6	0.0604718	13.3888	0
	High	cNGVLEGIR	1	35	7	Q80T68;Q8R384;E9QPE7;B2RWX0;Q5SX39;G3UW82;Q8VDD5	C1(Carbamidomethyl)	0	0	0.000533	3.15418	2	1017.51	-0.909891	14.0172	0
	High	ELTYQTEEDRK	1	13	3	B2RWX0;Q5SX39;G3UW82		0	0	0.004084	3.03761	2	1411.67	-1.75908	11.1562	1
	High	IKNAYEESLDHLETLKR	1	2	1	B2RWX0		0	0	0.0006402	2.97529	4	2059.08	-2.24862	20.6933	2
	High	ANLLQAEIEELR	1	7	2	B2RWX0;G3UW82		0	0	0.0001787	2.94477	2	1398.76	0.381511	21.4109	0
	High	QREEQAEPDGTEVADK	1	11	3	B2RWX0;Q5SX39;G3UW82		0	0	0.0001096	2.92766	3	1801.81	-2.90811	10.7667	1
	High	HDcDLLREQYEEEQEAK	2	3	2	B2RWX0;Q5SX39	C3(Carbamidomethyl)	0	0	0.002388	2.88024	3	2191.96	0.39648	14.9514	1
	High	TPGAmEHELVLHQLR	2	9	3	B2RWX0;Q5SX39;G3UW82	M5(Oxidation)	0	0	0.001381	2.83358	3	1746.9	0.254727	15.9568	0
	High	VGNEYVTK	1	21	3	B2RWX0;Q5SX39;G3UW82		0	0	0.0007743	2.83147	2	909.466	-2.22936	10.7976	0
	High	ANSEVAQWR	1	13	3	B2RWX0;Q5SX39;G3UW82		0	0	0.002189	2.80248	2	1060.52	-0.867898	12.4379	0
	High	LTGAVmHYGNmK	1	11	3	B2RWX0;Q5SX39;G3UW82	M6(Oxidation); M11(Oxidation)	0	0	0.001678	2.77982	2	1353.63	-1.86082	10.915	0
	High	KIQHELEEAEERADIAESQVNK	3	10	3	B2RWX0;Q5SX39;G3UW82		0	0	0.0008835	2.77685	4	2566.28	0.794405	19.753	2
	High	IQHELEEAEER	1	11	3	B2RWX0;Q5SX39;G3UW82		0	0	0.001708	2.73898	2	1382.65	-1.85447	11.5502	0
	High	GSSFQTVSALFR	2	11	3	B2RWX0;Q5SX39;G3UW82		0	0	3.162e-05	2.61726	2	1299.67	1.41329	20.186	0
	High	mFLWmVTR	1	11	3	B2RWX0;Q5SX39;G3UW82	M1(Oxidation); M5(Oxidation)	0	0	0.001898	2.49671	2	1115.54	0.168614	18.5332	0
	High	cnGVLEGIR	1	35	7	Q80T68;Q8R384;E9QPE7;B2RWX0;Q5SX39;G3UW82;Q8VDD5	C1(Carbamidomethyl); N2(Deamidated)	0	0	5.024e-05	2.34175	2	1018.5	-0.976018	14.6457	0
	High	IEDmAmmTHLHEPAVLYNLK	1	8	3	B2RWX0;Q5SX39;G3UW82	M4(Oxidation); M6(Oxidation); M7(Oxidation)	0	0	0.002945	2.08504	4	2404.13	-1.82876	18.14	0
	High	TLAYLFSGAAAAAEAESGGGGGKK	1	3	1	B2RWX0		0	0	5.072e-05	1.70613	3	2184.1	2.47501	20.8353	1
	High	AITDAAmmAEELKK	1	19	3	B2RWX0;Q5SX39;G3UW82	M7(Oxidation); M8(Oxidation)	0	0.001	0.008974	3.44053	2	1553.75	-0.555629	13.1345	1
	High	LDEAEQLALK	1	18	3	B2RWX0;Q5SX39;G3UW82		0	0.001	0.01523	3.41548	2	1129.61	0.79332	14.506	0
	High	TKYETDAIQRTEELEEAK	1	13	3	B2RWX0;Q5SX39;G3UW82		0	0.001	0.009141	3.36662	3	2154.06	1.19712	16.648	2
	High	AAYLQNLNSADLLK	1	2	1	B2RWX0		0	0.001	0.01707	3.35206	2	1533.83	0.00308786	19.0824	0
	High	IAEQELLDASER	1	7	2	B2RWX0;G3UW82		0	0.001	0.02152	3.28711	2	1373.69	-0.836074	15.2731	0
	High	KHADSVAELGEQIDNLQR	1	11	3	B2RWX0;Q5SX39;G3UW82		0	0.001	0.03112	3.03212	3	2023.01	-2.79666	19.3679	1
	High	LQDLVDKLQSK	1	4	1	B2RWX0		0	0.001	0.01028	3.02909	2	1286.73	-0.860337	14.97	1
	High	DTQLHLDDALR	1	10	3	B2RWX0;Q5SX39;G3UW82		0	0.001	0.03906	2.96967	2	1296.65	-0.915842	15.797	0
	High	IEAQNKPFDAK	1	11	2	B2RWX0;Q5SX39		0	0.001	0.008757	2.92941	2	1260.66	-2.49262	11.237	0
	High	VRELEGEVENEQKR	1	6	1	B2RWX0		0	0.001	0.03842	2.57903	3	1714.87	-1.4353	12.1316	2
	High	mVALmQEK	1	3	2	B2RWX0;Q5SX39	M1(Oxidation); M5(Oxidation)	0	0.001	0.02097	2.46466	2	981.472	-2.63069	10.8229	0
	High	VLNASAIPEGQFIDSKK	1	8	2	B2RWX0;Q5SX39		0	0.001	0.02251	2.33124	3	1816.98	1.01356	16.8351	1
	High	EFEmSNLQSK	1	5	3	B2RWX0;Q5SX39;G3UW82	M4(Oxidation)	0	0.001	0.01118	2.25153	2	1228.55	-1.03195	11.3038	0
	High	IQLELNQVK	1	9	3	B2RWX0;Q5SX39;G3UW82		0	0.001	0.03183	2.24291	2	1084.64	-0.6525	15.6	0
	High	LAQESTmDVENDKQQLDEK	1	2	1	B2RWX0	M7(Oxidation)	0	0.001	0.008401	2.21341	3	2237.02	-1.01282	11.5963	1
	High	LAQLITR	1	9	3	B2RWX0;Q5SX39;G3UW82		0	0.001	0.03701	2.07899	2	814.514	-0.646582	13.0441	0
	High	ILAEWK	1	8	2	B2RWX0;G3UW82		0	0.006	0.05514	1.71135	2	759.44	-0.404865	14.4544	0
	High	LYEQHLGK	1	7	3	B2RWX0;Q5SX39;G3UW82		0	0.007	0.08518	2.29496	2	987.524	-1.44875	11.1799	0
	High	TLEDQVSELK	1	6	2	B2RWX0;G3UW82		0	0.007	0.07754	2.15931	2	1161.6	-0.132857	14.6093	0
	High	SALAHALQSSR	1	2	1	B2RWX0		0	0.007	0.07254	2.04131	2	1140.61	-2.29588	12.7149	0
	High	MVALMQEK	1	3	2	B2RWX0;Q5SX39		0	0.007	0.09875	1.84311	2	949.483	-1.73099	13.7577	0
G3UW82	MCG140437, isoform CRA_d OS=Mus musculus GN=Myh2 PE=4 SV=1 - [G3UW82_MOUSE]	378.871	39.8	12	7	73	106	1942	223.081	5.77002
	A2	Sequence	# PSMs	# Proteins	# Protein Groups	Protein Group Accessions	Modifications	ΔCn	q-Value	PEP	XCorr	Charge	MH+ [Da]	ΔM [ppm]	RT [min]	# Missed Cleavages
	High	ALQEAHQQTLDDLQAEEDKVNTLTK	3	7	3	B2RWX0;Q5SX39;G3UW82		0	0	6.513e-13	6.63823	3	2838.41	-1.58244	18.3954	1
	High	ELEEISERLEEAGGATSAQIEmNK	1	5	3	B2RWX0;Q5SX39;G3UW82	M22(Oxidation)	0	0	1.657e-08	6.37532	3	2650.25	-2.0264	18.2829	1
	High	DLEEATLQHEATAATLR	2	5	2	B2RWX0;G3UW82		0	0	1.381e-07	5.73121	2	1868.93	-1.34336	16.8628	0
	High	LEEAGGATSAQIEmNK	1	5	3	B2RWX0;Q5SX39;G3UW82	M14(Oxidation)	0	0	2.494e-07	5.57153	2	1664.78	-0.132003	11.3859	0
	High	KKLETDISQIQGEmEDIVQEAR	3	7	3	B2RWX0;Q5SX39;G3UW82	M14(Oxidation)	0	0	2.621e-06	5.34018	3	2576.28	-1.71728	19.6161	2
	High	NLQQEISDLTEQIAEGGK	2	8	3	B2RWX0;Q5SX39;G3UW82		0	0	3.42e-11	5.25541	2	1972.98	-1.14205	24.5971	0
	High	mQGTLEDQIISANPLLEAFGNAK	3	9	3	B2RWX0;Q5SX39;G3UW82	M1(Oxidation)	0	0	8.203e-07	5.14608	3	2476.23	-2.84286	25.273	0
	High	HADSVAELGEQIDNLQR	2	11	3	B2RWX0;Q5SX39;G3UW82		0	0	2.893e-13	5.11741	2	1894.92	-0.4344	18.2644	0
	High	LEQQVDDLEGSLEQEKK	2	12	3	B2RWX0;Q5SX39;G3UW82		0	0	1.875e-07	4.8206	2	1987.98	-0.476197	15.6893	1
	High	GQTVEQVTNAVGALAK	1	2	1	G3UW82		0	0	1.091e-06	4.76995	2	1585.85	-1.35497	17.8402	0
	High	KLETDISQIQGEmEDIVQEAR	1	7	3	B2RWX0;Q5SX39;G3UW82	M13(Oxidation)	0	0	3.05e-09	4.7151	3	2448.2	1.73274	18.4296	1
	High	NKDPLNETVVGLYQK	3	17	3	B2RWX0;Q5SX39;G3UW82		0	0	0.0004455	4.63938	2	1717.91	0.238554	17.449	1
	High	IKEVTERAEDEEEINAELTAK	1	7	2	B2RWX0;G3UW82		0	0	2.32e-06	4.62419	3	2417.2	-0.282916	16.5413	2
	High	VVESmQSTLDAEIR	1	7	3	B2RWX0;Q5SX39;G3UW82	M5(Oxidation)	0	0	3.293e-09	4.53018	2	1593.78	-0.362904	13.752	0
	High	NAYEESLDQLETLKR	2	4	2	Q5SX39;G3UW82		0	0	1.567e-06	4.46144	2	1808.9	-1.64054	18.2861	1
	High	VQLLHTQNTSLINTK	2	9	3	B2RWX0;Q5SX39;G3UW82		0	0	5.244e-10	4.42316	2	1709.95	-0.354559	15.6027	0
	High	KLEDEcSELKK	1	15	3	B2RWX0;Q5SX39;G3UW82	C6(Carbamidomethyl)	0	0	8.621e-07	4.25287	3	1378.69	-0.0204602	11.415	2
	High	LQNEVEDLmLDVER	3	8	3	B2RWX0;Q5SX39;G3UW82	M9(Oxidation)	0	0	6.416e-05	4.24631	2	1718.83	2.52725	17.8964	0
	High	GKQAFTQQIEELKR	3	5	3	B2RWX0;Q5SX39;G3UW82		0	0	1.486e-05	4.24529	3	1675.91	-1.07972	16.8847	2
	High	LEEAGGATSAQIEMNK	1	5	3	B2RWX0;Q5SX39;G3UW82		0	0	2.591e-11	4.24214	2	1648.78	-2.40298	12.7447	0
	High	KALQEAHQQTLDDLQAEEDKVNTLTK	1	7	3	B2RWX0;Q5SX39;G3UW82		0	0	1.325e-05	4.2306	4	2966.5	-3.18497	19.7971	2
	High	NLTEEMAGLDETIAK	1	5	2	B2RWX0;G3UW82		0	0	5.392e-07	4.22475	2	1634.79	-2.18639	19.555	0
	High	AEDEEEINAELTAK	1	8	3	B2RWX0;Q5SX39;G3UW82		0	0	6.781e-09	4.20176	2	1561.72	-0.65437	14.2875	0
	High	IEELEEEIEAER	1	12	3	B2RWX0;Q5SX39;G3UW82		0	0	7.89e-05	4.16378	2	1488.71	-0.917291	16.4163	0
	High	LEQQVDDLEGSLEQEK	1	12	3	B2RWX0;Q5SX39;G3UW82		0	0	1.544e-06	4.1266	2	1859.89	0.606392	16.4313	0
	High	LQAAEEHVEAVNAK	1	4	1	G3UW82		0	0	0.00019	4.06206	2	1508.77	-0.315648	11.4926	0
	High	ENQSILITGESGAGK	1	18	3	B2RWX0;Q5SX39;G3UW82		0	0	1.353e-08	4.04118	2	1503.76	-0.121823	13.891	0
	High	LASADIETYLLEK	1	19	3	B2RWX0;Q5SX39;G3UW82		0	0	1.292e-07	4.00175	2	1465.78	1.73434	20.1712	0
	High	KIAEQELLDASER	2	7	2	B2RWX0;G3UW82		0	0	7.177e-08	3.99859	2	1501.78	-1.25199	15.2431	1
	High	NLTEEmAGLDETIAK	1	5	2	B2RWX0;G3UW82	M6(Oxidation)	0	0	9.267e-06	3.97716	2	1650.79	-1.08141	15.489	0
	High	LDEAEQLALKGGK	1	18	3	B2RWX0;Q5SX39;G3UW82		0	0	7.691e-05	3.86546	2	1371.74	-4.04167	13.7097	1
	High	IAEKDEEIDQLKR	2	8	3	B2RWX0;Q5SX39;G3UW82		0	0	7.982e-06	3.84298	2	1586.84	-1.13041	12.9099	2
	High	IEDEQAIGIQLQK	1	2	1	G3UW82		0	0	3.047e-07	3.82553	2	1484.79	-0.734181	15.7385	0
	High	VIQYFATIAVTGDK	1	8	2	Q5SX39;G3UW82		0	0	2.172e-05	3.82111	2	1525.82	-3.78236	19.2734	0
	High	DIDDLELTLAK	1	17	3	B2RWX0;Q5SX39;G3UW82		0	0	9.795e-05	3.80933	2	1245.65	-2.11183	19.6596	0
	High	LAQESImDIENEKQQLDER	1	2	1	G3UW82	M7(Oxidation)	0	0	0.001916	3.72552	3	2305.1	-0.34199	15.824	1
	High	IKLEQQVDDLEGSLEQEK	1	4	2	B2RWX0;G3UW82		0	0	2.821e-09	3.68103	3	2101.06	-0.962514	19.4422	1
	High	LLGSIDIDHTQYK	1	9	3	B2RWX0;Q5SX39;G3UW82		0	0	3.139e-05	3.67719	2	1502.78	-0.420515	16.1989	0
	High	KKHADSVAELGEQIDNLQR	3	11	3	B2RWX0;Q5SX39;G3UW82		0	0	1.788e-07	3.66877	3	2151.11	-0.785494	22.5932	2
	High	IQHELEEAEERADIAESQVNK	1	10	3	B2RWX0;Q5SX39;G3UW82		0	0	3.068e-05	3.65566	3	2438.18	-0.910948	17.3571	1
	High	KAITDAAmmAEELKK	1	19	3	B2RWX0;Q5SX39;G3UW82	M8(Oxidation); M9(Oxidation)	0	0	0.0004566	3.64837	3	1681.85	-1.82735	13.4421	2
	High	TKYETDAIQR	2	13	3	B2RWX0;Q5SX39;G3UW82		0	0	3.735e-05	3.62767	3	1224.62	-1.603	11.2168	1
	High	KGSSFQTVSALFR	1	11	3	B2RWX0;Q5SX39;G3UW82		0	0	0.0001189	3.62244	2	1427.76	-1.96193	20.0864	1
	High	VKELTYQTEEDRK	1	11	3	B2RWX0;Q5SX39;G3UW82		0	0	0.004172	3.53907	2	1638.83	-1.25386	12.041	2
	High	VLNASAIPEGQYIDSK	1	2	1	G3UW82		0	0	3.11e-07	3.51285	2	1704.88	-0.968745	16.3637	0
	High	KKEFEmSNLQSK	1	5	3	B2RWX0;Q5SX39;G3UW82	M6(Oxidation)	0	0	0.005263	3.48846	2	1484.74	-1.18181	11.5818	2
	High	ADIAESQVNK	1	19	3	B2RWX0;Q5SX39;G3UW82		0	0	0.004585	3.43563	2	1074.54	-2.25452	10.7894	0
	High	LQNEVEDLMLDVER	1	8	3	G3UW82;B2RWX0;Q5SX39		0	0	0.0001641	3.34271	2	1702.84	2.14551	21.5048	0
	High	QAFTQQIEELKR	2	6	3	B2RWX0;Q5SX39;G3UW82		0	0	0.001365	3.26578	3	1490.79	-1.81755	16.0042	1
	High	LTGAVMHYGNmK	1	11	3	B2RWX0;Q5SX39;G3UW82	M11(Oxidation)	0	0	1.824e-06	3.25018	2	1337.63	-0.574089	12.3636	0
	High	cNGVLEGIR	1	35	7	Q80T68;Q8R384;E9QPE7;B2RWX0;Q5SX39;G3UW82;Q8VDD5	C1(Carbamidomethyl)	0	0	0.000533	3.15418	2	1017.51	-0.909891	14.0172	0
	High	LINDLTTQR	1	1	1	G3UW82		0	0	0.002141	3.09272	2	1073.59	-0.315956	12.9493	0
	High	ELTYQTEEDRK	1	13	3	B2RWX0;Q5SX39;G3UW82		0	0	0.004084	3.03761	2	1411.67	-1.75908	11.1562	1
	High	ANLLQAEIEELR	1	7	2	B2RWX0;G3UW82		0	0	0.0001787	2.94477	2	1398.76	0.381511	21.4109	0
	High	QREEQAEPDGTEVADK	1	11	3	B2RWX0;Q5SX39;G3UW82		0	0	0.0001096	2.92766	3	1801.81	-2.90811	10.7667	1
	High	TPGAmEHELVLHQLR	2	9	3	B2RWX0;Q5SX39;G3UW82	M5(Oxidation)	0	0	0.001381	2.83358	3	1746.9	0.254727	15.9568	0
	High	VGNEYVTK	1	21	3	B2RWX0;Q5SX39;G3UW82		0	0	0.0007743	2.83147	2	909.466	-2.22936	10.7976	0
	High	ANSEVAQWR	1	13	3	B2RWX0;Q5SX39;G3UW82		0	0	0.002189	2.80248	2	1060.52	-0.867898	12.4379	0
	High	LTGAVmHYGNmK	1	11	3	B2RWX0;Q5SX39;G3UW82	M6(Oxidation); M11(Oxidation)	0	0	0.001678	2.77982	2	1353.63	-1.86082	10.915	0
	High	KIQHELEEAEERADIAESQVNK	3	10	3	B2RWX0;Q5SX39;G3UW82		0	0	0.0008835	2.77685	4	2566.28	0.794405	19.753	2
	High	IQHELEEAEER	1	11	3	B2RWX0;Q5SX39;G3UW82		0	0	0.001708	2.73898	2	1382.65	-1.85447	11.5502	0
	High	GSSFQTVSALFR	2	11	3	B2RWX0;Q5SX39;G3UW82		0	0	3.162e-05	2.61726	2	1299.67	1.41329	20.186	0
	High	mFLWmVTR	1	11	3	B2RWX0;Q5SX39;G3UW82	M1(Oxidation); M5(Oxidation)	0	0	0.001898	2.49671	2	1115.54	0.168614	18.5332	0
	High	cnGVLEGIR	1	35	7	Q80T68;Q8R384;E9QPE7;B2RWX0;Q5SX39;G3UW82;Q8VDD5	C1(Carbamidomethyl); N2(Deamidated)	0	0	5.024e-05	2.34175	2	1018.5	-0.976018	14.6457	0
	High	IEDmAmmTHLHEPAVLYNLK	1	8	3	B2RWX0;Q5SX39;G3UW82	M4(Oxidation); M6(Oxidation); M7(Oxidation)	0	0	0.002945	2.08504	4	2404.13	-1.82876	18.14	0
	High	AITDAAmmAEELKK	1	19	3	B2RWX0;Q5SX39;G3UW82	M7(Oxidation); M8(Oxidation)	0	0.001	0.008974	3.44053	2	1553.75	-0.555629	13.1345	1
	High	LDEAEQLALK	1	18	3	B2RWX0;Q5SX39;G3UW82		0	0.001	0.01523	3.41548	2	1129.61	0.79332	14.506	0
	High	TKYETDAIQRTEELEEAK	1	13	3	B2RWX0;Q5SX39;G3UW82		0	0.001	0.009141	3.36662	3	2154.06	1.19712	16.648	2
	High	IAEQELLDASER	1	7	2	B2RWX0;G3UW82		0	0.001	0.02152	3.28711	2	1373.69	-0.836074	15.2731	0
	High	VRELEGEVESEQKR	1	1	1	G3UW82		0	0.001	0.03841	3.06179	3	1687.86	-1.50941	12.3426	2
	High	KHADSVAELGEQIDNLQR	1	11	3	B2RWX0;Q5SX39;G3UW82		0	0.001	0.03112	3.03212	3	2023.01	-2.79666	19.3679	1
	High	DTQLHLDDALR	1	10	3	B2RWX0;Q5SX39;G3UW82		0	0.001	0.03906	2.96967	2	1296.65	-0.915842	15.797	0
	High	EFEmSNLQSK	1	5	3	B2RWX0;Q5SX39;G3UW82	M4(Oxidation)	0	0.001	0.01118	2.25153	2	1228.55	-1.03195	11.3038	0
	High	IQLELNQVK	1	9	3	B2RWX0;Q5SX39;G3UW82		0	0.001	0.03183	2.24291	2	1084.64	-0.6525	15.6	0
	High	LAQLITR	1	9	3	B2RWX0;Q5SX39;G3UW82		0	0.001	0.03701	2.07899	2	814.514	-0.646582	13.0441	0
	High	ILAEWK	1	8	2	B2RWX0;G3UW82		0	0.006	0.05514	1.71135	2	759.44	-0.404865	14.4544	0
	High	LYEQHLGK	1	7	3	B2RWX0;Q5SX39;G3UW82		0	0.007	0.08518	2.29496	2	987.524	-1.44875	11.1799	0
	High	TLEDQVSELK	1	6	2	B2RWX0;G3UW82		0	0.007	0.07754	2.15931	2	1161.6	-0.132857	14.6093	0
B7FAU9	Filamin, alpha OS=Mus musculus GN=Flna PE=1 SV=1 - [B7FAU9_MOUSE]	139.511	21.86	11	36	36	41	2639	280.325	6.01123
	A2	Sequence	# PSMs	# Proteins	# Protein Groups	Protein Group Accessions	Modifications	ΔCn	q-Value	PEP	XCorr	Charge	MH+ [Da]	ΔM [ppm]	RT [min]	# Missed Cleavages
	High	FGGEHVPNSPFQVTALAGDQPTVQTPLR	2	6	1	B7FAU9		0	0	8.983e-10	5.94517	3	2963.5	-0.164264	20.5794	0
	High	SPYTVTVGQAcNPAAcR	1	6	1	B7FAU9	C11(Carbamidomethyl); C16(Carbamidomethyl)	0	0	5.656e-11	4.85023	2	1851.85	-1.11815	14.0285	0
	High	VQVQDNEGcSVEATVK	1	6	1	B7FAU9	C9(Carbamidomethyl)	0	0	1.678e-08	4.59231	2	1762.82	-1.52399	12.3156	0
	High	VTAQGPGLEPSGNIANK	1	6	1	B7FAU9		0	0	0.0001914	4.46098	2	1652.86	-1.05465	12.7839	0
	High	EGSYSISVLYGEEEVPR	1	5	1	B7FAU9		0	0	1.678e-08	4.16493	2	1913.9	-4.79086	19.0268	0
	High	ASGPGLNTTGVPASLPVEFTIDAK	2	5	1	B7FAU9		0	0	7.292e-09	4.14259	2	2342.22	0.097084	21.5622	0
	High	TGVAVNKPAEFTVDAK	2	5	1	B7FAU9		0	0	7.998e-08	4.12527	2	1646.87	-0.726513	14.4249	0
	High	SPFSVGVSPSLDLSK	1	6	1	B7FAU9		0	0	6.387e-05	4.04479	2	1519.8	-0.870843	18.9487	0
	High	SPFEVYVDKSQGDASK	2	6	1	B7FAU9		0	0	0.0002964	4.02243	2	1756.84	0.847163	15.1427	1
	High	GAGTGGLGLAVEGPSEAK	1	5	1	B7FAU9		0	0	4.93e-07	3.93846	2	1570.81	-0.268019	15.2248	0
	High	DAGEGLLAVQITDPEGKPK	1	5	1	B7FAU9		0	0	2.142e-06	3.83909	2	1938.02	-0.299129	18.1244	0
	High	DAGEGGLSLAIEGPSK	1	5	1	B7FAU9		0	0	2.045e-08	3.82533	2	1500.75	-0.111578	17.1771	0
	High	GLVEPVDVVDNADGTQTVNYVPSR	1	5	1	B7FAU9		0	0	6.586e-08	3.61992	3	2544.26	0.157424	18.6423	0
	High	ANLPQSFQVDTSK	1	5	1	B7FAU9		0	0	0.0001986	3.57106	2	1434.72	-0.5479	14.967	0
	High	DVDIIDHHDNTYTVK	1	6	1	B7FAU9		0	0	0.003758	3.45804	2	1784.85	0.545461	14.6274	0
	High	YGGQPVPNFPSK	1	5	1	B7FAU9		0	0	7.417e-05	3.39224	2	1290.65	-1.04707	14.1208	0
	High	YNDQHIPGSPFTAR	1	5	1	B7FAU9		0	0	3.83e-05	3.28512	3	1602.76	-1.53384	15.1946	0
	High	YGGDEIPFSPYR	1	5	1	B7FAU9		0	0	5.761e-07	3.25847	2	1400.65	-1.85335	17.8594	0
	High	GKLDVQFSGLAK	1	6	1	B7FAU9		0	0	7.223e-06	3.21705	2	1262.71	-0.971923	16.5355	1
	High	AFGPGLQGGNAGSPAR	1	6	1	B7FAU9		0	0	1.236e-07	3.20149	2	1456.73	-1.55485	13.0565	0
	High	SAGQGEVLVYVEDPAGHQEEAK	1	6	1	B7FAU9		0	0	2.401e-06	3.13951	3	2313.1	-0.497405	16.6975	0
	High	VSGLGDKVDVGKDQEFTVK	2	6	1	B7FAU9		0	0	0.005839	3.13258	3	2021.05	-4.58217	16.016	2
	High	DAEmPATEKDLAEDAPWKK	1	5	1	B7FAU9	M4(Oxidation)	0	0	0.0004587	3.05635	3	2161.01	-0.720592	15.7164	2
	High	VATVPQHATSGPGPADVSK	1	6	1	B7FAU9		0	0	2.292e-06	2.97263	3	1818.93	-1.60949	11.4501	0
	High	VTVLFAGQHIAK	1	6	1	B7FAU9		0	0	0.002907	2.88956	2	1283.75	-1.12034	16.2079	0
	High	IVSPSGAAVPcKVEPGLGADNSVVR	1	6	1	B7FAU9	C11(Carbamidomethyl)	0	0	0.002277	2.80289	3	2479.29	-1.18845	16.0346	1
	High	AWGPGLEGGIVGK	1	5	1	B7FAU9		0	0	6.664e-06	2.74573	2	1240.67	-1.69414	17.339	0
	High	VPVHDVTDASK	1	5	1	B7FAU9		0	0	0.001063	2.70898	2	1167.6	-2.37877	10.8372	0
	High	GTVEPQLEAR	1	6	1	B7FAU9		0	0	0.005013	2.48832	2	1099.57	-1.44771	11.9605	0
	High	FNEEHIPDSPFVVPVASPSGDAR	1	6	1	B7FAU9		0	0	0.002324	2.45267	3	2467.19	-0.104362	19.9968	0
	High	EATTEFSVDAR	1	5	1	B7FAU9		0	0	0.0001895	2.42504	2	1225.57	-1.65541	13.2318	0
	High	LPQLPITNFSR	1	6	1	B7FAU9		0	0	0.006949	2.16238	2	1285.72	-1.60263	19.5522	0
	High	AGVAPLQVK	1	5	1	B7FAU9		0	0.001	0.02549	2.56537	2	882.54	-0.717932	12.9762	0
	High	AEVGVPAEFGIWTR	1	4	1	B7FAU9		0	0.001	0.01424	2.43046	2	1531.79	0.804467	21.1077	0
	High	AYGPGIEPTGNMVK	1	6	1	B7FAU9		0	0.003	0.04655	2.69882	2	1433.71	-0.342745	14.6152	0
	High	AEFTVETR	1	6	1	B7FAU9		0	0.007	0.07208	2.2839	2	952.472	-1.58522	12.4821	0
Q80T68	MKIAA3005 protein (Fragment) OS=Mus musculus GN=Myh10 PE=2 SV=1 - [Q80T68_MOUSE]	95.9883	16.26	11	7	28	34	1833	212.352	5.5542
	A2	Sequence	# PSMs	# Proteins	# Protein Groups	Protein Group Accessions	Modifications	ΔCn	q-Value	PEP	XCorr	Charge	MH+ [Da]	ΔM [ppm]	RT [min]	# Missed Cleavages
	High	LQQLFNHTmFILEQEEYQR	1	12	4	Q80T68;Q8R384;Q8VDD5;E9QPE7	M9(Oxidation)	0	0	1.895e-11	5.99458	3	2483.2	-0.036487	20.1074	0
	High	IVGLDQVTGmTETAFGSAYK	1	7	1	Q80T68	M10(Oxidation)	0	0	1.454e-07	5.68212	2	2104.02	-2.03789	19.4735	0
	High	TQLEELEDELQATEDAK	1	13	4	Q80T68;Q8VDD5;Q8R384;E9QPE7		0	0	4.035e-08	4.92102	2	1961.92	-0.650029	20.5986	0
	High	HATALEELSEQLEQAKR	1	6	1	Q80T68		0	0	4.631e-06	3.93204	3	1953	-2.83627	21.5865	1
	High	EDQSILcTGESGAGK	1	16	4	Q80T68;Q8R384;E9QPE7;Q8VDD5	C7(Carbamidomethyl)	0	0	2.908e-05	3.80935	2	1551.69	-1.10205	12.8384	0
	High	AGKLDPHLVLDQLR	2	8	2	Q80T68;Q8VDD5		0	0	1.196e-05	3.68349	2	1574.9	-1.14139	19.8406	1
	High	ELDDATEANEGLSR	1	6	1	Q80T68		0	0	8.652e-06	3.49461	2	1519.68	-1.8277	12.3336	0
	High	IGQLEEQLEQEAK	1	6	1	Q80T68		0	0	2.583e-05	3.47655	2	1514.77	0.289087	16.0737	0
	High	AGVLAHLEEER	2	7	2	Q80T68;Q8VDD5		0	0	0.001651	3.25578	2	1223.63	-3.65375	15.2307	0
	High	mQAHIQDLEEQLDEEEGAR	1	6	1	Q80T68	M1(Oxidation)	0	0	4.856e-06	3.23308	3	2257.01	1.8265	17.0927	0
	High	ADFcIIHYAGK	2	8	2	Q80T68;Q8VDD5	C4(Carbamidomethyl)	0	0	0.001391	3.20602	2	1294.62	0.0079007	16.7499	0
	High	cNGVLEGIR	1	35	7	Q80T68;Q8R384;E9QPE7;B2RWX0;Q5SX39;G3UW82;Q8VDD5	C1(Carbamidomethyl)	0	0	0.000533	3.15418	2	1017.51	-0.909891	14.0172	0
	High	DKADFcIIHYAGK	1	8	2	Q80T68;Q8VDD5	C6(Carbamidomethyl)	0	0	0.005025	3.12712	3	1537.74	-1.21416	16.9312	1
	High	VDYKADEWLmK	2	8	2	Q80T68;Q8VDD5	M10(Oxidation)	0	0	0.0017	2.94485	3	1413.67	-0.954539	15.7911	1
	High	LDPHLVLDQLR	2	8	2	Q80T68;Q8VDD5		0	0	0.0001292	2.69412	3	1318.75	0.266374	19.1313	0
	High	ALEEALEAK	1	10	3	Q80T68;Q8R384;E9QPE7		0	0	0.002865	2.55848	2	973.519	-0.860411	12.9225	0
	High	KFDQLLAEEK	1	17	4	Q80T68;Q8R384;E9QPE7;Q8VDD5		0	0	0.0007236	2.52578	3	1220.65	-0.0221363	14.8388	1
	High	cnGVLEGIR	1	35	7	Q80T68;Q8R384;E9QPE7;B2RWX0;Q5SX39;G3UW82;Q8VDD5	C1(Carbamidomethyl); N2(Deamidated)	0	0	5.024e-05	2.34175	2	1018.5	-0.976018	14.6457	0
	High	VKPLLQVTR	1	12	3	Q80T68;Q8R384;E9QPE7		0	0	0.003226	2.15231	2	1053.68	-0.84632	14.2668	0
	High	ALELDPNLYR	1	11	3	Q80T68;Q8R384;E9QPE7		0	0	0.0001543	2.02547	2	1203.63	-1.60016	17.7175	0
	High	VIQYLAHVASSHK	1	10	2	Q80T68;Q8VDD5		0	0	0.001369	1.47777	3	1452.8	-0.231604	15.5284	0
	High	AGVLAHLEEERDLK	1	7	2	Q80T68;Q8VDD5		0	0.001	0.01368	4.01632	2	1579.84	-0.625501	17.3669	1
	High	FDQLLAEEK	1	17	4	Q80T68;Q8R384;E9QPE7;Q8VDD5		0	0.001	0.01209	2.96114	2	1092.56	0.741102	14.3297	0
	High	DDVGKNVHELEK	1	10	3	Q80T68;Q8R384;E9QPE7		0	0.001	0.01311	2.61995	3	1382.69	-1.80737	11.7569	1
	High	QVLALQSQLADTK	1	6	1	Q80T68		0	0.001	0.01015	2.45489	2	1414.79	-1.98069	16.0222	0
	High	ADEWLmK	1	8	2	Q80T68;Q8VDD5	M6(Oxidation)	0	0.001	0.03537	2.4481	2	908.419	0.307529	13.1166	0
	High	cIIPNHEK	1	12	4	Q80T68;Q8R384;Q8VDD5;E9QPE7	C1(Carbamidomethyl)	0	0.001	0.009853	2.09127	2	1010.51	-1.60967	11.4327	0
	High	TVGQLYK	1	14	4	Q80T68;Q8R384;E9QPE7;Q8VDD5		0	0.001	0.01229	2.01339	2	808.456	-0.987476	11.6171	0
	High	EQADFAVEALAK	1	7	1	Q80T68		0	0.007	0.1029	2.26442	2	1291.65	-1.3631	17.1742	0
Q9JKF1	Ras GTPase-activating-like protein IQGAP1 OS=Mus musculus GN=Iqgap1 PE=1 SV=2 - [IQGA1_MOUSE]	68.5657	15.63	19	20	20	22	1657	188.624	6.48096
	A2	Sequence	# PSMs	# Proteins	# Protein Groups	Protein Group Accessions	Modifications	ΔCn	q-Value	PEP	XCorr	Charge	MH+ [Da]	ΔM [ppm]	RT [min]	# Missed Cleavages
	High	FALGISAINEAVDSGDVGR	1	5	1	Q9JKF1		0	0	3.195e-13	5.20414	2	1890.95	-1.52564	21.1907	0
	High	VDQIQEIVTGNPTVIK	2	6	1	Q9JKF1		0	0	9.817e-09	5.11268	2	1753.97	-0.969381	18.4204	0
	High	SNQQLENDLNLmDIK	1	7	1	Q9JKF1	M12(Oxidation)	0	0	4.607e-09	4.6217	2	1790.85	-4.93679	17.4242	0
	High	GVLLEIEDLQANQFK	1	7	1	Q9JKF1		0	0	4.611e-09	4.48435	2	1716.91	-1.89966	21.8626	0
	High	EEIQSSISGVTAAYNR	1	5	1	Q9JKF1		0	0	2.035e-06	4.2237	2	1724.84	-1.70606	15.8208	0
	High	ILAIGLINEALDEGDAQK	2	6	1	Q9JKF1		0	0	6.749e-05	4.02538	2	1883.01	1.09742	23.4449	0
	High	ATFYGEQVDYYK	1	7	1	Q9JKF1		0	0	0.003416	3.205	2	1483.67	-2.72421	16.1044	0
	High	LQQTYSALNSK	1	7	1	Q9JKF1		0	0	0.0001216	3.0777	2	1252.65	-1.05235	11.908	0
	High	TLQALQIPAAK	1	6	1	Q9JKF1		0	0	0.0009339	3.01834	2	1153.69	-1.56457	16.1808	0
	High	LFQTALQEEIK	1	6	1	Q9JKF1		0	0	0.0004848	2.98606	2	1319.72	-1.36673	17.4122	0
	High	ALQSLALGLR	1	9	1	Q9JKF1		0	0	0.0001757	2.91631	2	1041.64	-1.90789	17.9433	0
	High	LPYDVTPEQALSHEEVK	1	6	1	Q9JKF1		0	0	4.005e-05	2.69636	3	1954.98	0.447756	17.3637	0
	High	YQELINDIAK	1	6	1	Q9JKF1		0	0	0.003504	2.60785	2	1206.63	-1.3144	16.0892	0
	High	LIFQmPQNK	1	11	1	Q9JKF1	M5(Oxidation)	0	0	0.005169	2.55915	2	1134.6	-1.13276	13.8368	0
	High	LGLAPQIQDLYGK	1	9	1	Q9JKF1		0	0	0.0008901	2.30432	2	1415.79	0.00207614	19.3349	0
	High	TLINAEDPPmIVVR	1	7	1	Q9JKF1	M10(Oxidation)	0	0.001	0.0128	3.26631	2	1583.85	0.689042	17.5138	0
	High	ITLQDVVSHSK	1	7	1	Q9JKF1		0	0.001	0.02592	1.96574	3	1226.67	-0.0142417	16.0469	0
	High	LTELGTVDPK	1	6	1	Q9JKF1		0	0.002	0.04316	2.15082	2	1072.59	1.61875	13.1962	0
	High	IFYPETTDIYDR	1	9	1	Q9JKF1		0	0.003	0.04612	2.15838	2	1532.72	-1.47215	17.5077	0
	High	TcLDNLASK	1	5	1	Q9JKF1	C2(Carbamidomethyl)	0	0.007	0.08014	2.05845	2	1021.5	-0.992938	12.2825	0
E9QA74	Unconventional myosin-XVIIIa OS=Mus musculus GN=Myo18a PE=1 SV=1 - [E9QA74_MOUSE]	64.6902	15.16	7	19	19	19	1642	186.421	5.89697
	A2	Sequence	# PSMs	# Proteins	# Protein Groups	Protein Group Accessions	Modifications	ΔCn	q-Value	PEP	XCorr	Charge	MH+ [Da]	ΔM [ppm]	RT [min]	# Missed Cleavages
	High	NTGESASQLLDAETAER	1	6	1	E9QA74		0	0	9.211e-07	5.66194	2	1791.83	-2.10767	15.5841	0
	High	VKDQEEELDEQAGSIQmLEQAK	1	6	1	E9QA74	M17(Oxidation)	0	0	5.69e-09	5.61412	3	2534.19	-0.19391	16.7588	1
	High	AAEINGEVDDDDAGGEWR	1	6	1	E9QA74		0	0	1.102e-12	5.22086	2	1918.81	0.397347	14.6243	0
	High	NQLEESEFTcAAAVK	1	7	1	E9QA74	C10(Carbamidomethyl)	0	0	1.689e-08	4.63232	2	1696.78	-1.89392	15.4144	0
	High	ISELTSELTDERNTGESASQLLDAETAER	1	6	1	E9QA74		0	0	0.001496	4.56425	3	3165.5	-0.220116	19.2457	1
	High	RFDSELSQAHEETQR	1	6	1	E9QA74		0	0	1.107e-08	3.74601	3	1832.85	-0.923286	13.0708	1
	High	AVEELLESLDLEK	1	6	1	E9QA74		0	0	0.0009061	3.71415	2	1487.79	0.719511	22.2036	0
	High	QDQSIVLLGSSGSGK	1	6	1	E9QA74		0	0	1.197e-05	3.63109	2	1475.77	0.0731146	15.5503	0
	High	LFTTVRPLIQVQLSEEQIR	1	6	1	E9QA74		0	0	0.0001147	3.61571	3	2270.28	-1.05465	21.3109	0
	High	ISELTSELTDER	1	6	1	E9QA74		0	0	1.084e-06	3.32815	2	1392.68	-0.431769	15.4339	0
	High	TFLQELER	1	6	1	E9QA74		0	0	0.001763	3.10142	2	1035.55	-1.35337	18.2771	0
	High	GASFEELcHNYAQDR	1	6	1	E9QA74	C8(Carbamidomethyl)	0	0	0.005004	2.32866	3	1796.76	-0.483984	15.4205	0
	High	IISNLFLGR	1	6	1	E9QA74		0	0	0.003166	1.6002	2	1032.62	-0.874549	19.0916	0
	High	VLAISPEEQK	1	6	1	E9QA74		0	0.001	0.03571	2.30097	2	1113.61	-1.34545	12.898	0
	High	NKDEEIQQLR	1	6	1	E9QA74		0	0.001	0.02177	2.23443	2	1272.65	-0.837195	11.9693	1
	High	SSccLGLSR	1	6	1	E9QA74	C3(Carbamidomethyl); C4(Carbamidomethyl)	0	0.001	0.02951	2.051	2	1039.46	-1.2719	12.0753	0
	High	VVSLEAELQDISSQESKDEASLAK	1	6	1	E9QA74		0	0.007	0.09327	2.76237	3	2576.29	-0.905659	22.2288	1
	High	LTAELQDTK	1	6	1	E9QA74		0	0.007	0.09635	2.638	2	1018.54	-0.968403	11.5475	0
	High	LHLEGQQVR	1	6	1	E9QA74		0	0.007	0.1013	1.94459	2	1079.59	-1.16094	12.0809	0
Q62261	Spectrin beta chain, non-erythrocytic 1 OS=Mus musculus GN=Sptbn1 PE=1 SV=2 - [SPTB2_MOUSE]	60.4371	11.05	6	18	18	19	2363	274.052	5.57959
	A2	Sequence	# PSMs	# Proteins	# Protein Groups	Protein Group Accessions	Modifications	ΔCn	q-Value	PEP	XCorr	Charge	MH+ [Da]	ΔM [ppm]	RT [min]	# Missed Cleavages
	High	SQNIITDSSSLNAEAIR	1	1	1	Q62261		0	0	3.219e-07	5.67471	2	1818.91	-2.36774	16.5896	0
	High	TQTAIASEDmPNTLTEAEK	1	2	1	Q62261	M10(Oxidation)	0	0	9.853e-07	5.13331	2	2065.96	-0.820457	13.4154	0
	High	EIEELQSQAQALSQEGK	1	2	1	Q62261		0	0	4.866e-10	4.79876	2	1887.93	-0.657358	15.7255	0
	High	VIESTQDLGNDLAGVmALQR	1	2	1	Q62261	M16(Oxidation)	0	0	8.791e-06	4.48889	3	2146.08	-2.70628	18.8893	0
	High	mLTAQDmSYDEAR	1	1	1	Q62261	M1(Oxidation); M7(Oxidation)	0	0	4.686e-09	4.12017	2	1562.64	-1.27903	11.4682	0
	High	LVSQDNFGFDLPAVEAATK	1	3	1	Q62261		0	0	0.005449	3.64646	2	2022.02	1.10676	21.6723	0
	High	FESLEPEmNNQASR	1	2	1	Q62261	M8(Oxidation)	0	0	8.274e-05	3.52281	2	1667.73	-2.03537	12.6888	0
	High	TLETPAAQmEGFLNR	1	2	1	Q62261	M9(Oxidation)	0	0	7.89e-05	3.45038	2	1693.82	-1.52971	15.8599	0
	High	FmELLEPLSER	1	2	1	Q62261	M2(Oxidation)	0	0	0.002199	3.17117	2	1379.69	2.16937	18.4047	0
	High	LLTQHENIKNEIDNYEEDYQK	2	2	1	Q62261		0	0	0.0008506	3.14153	4	2636.24	-1.60625	18.0566	1
	High	SALPAQSAATLPAR	1	2	1	Q62261		0	0	4.454e-05	2.95194	2	1353.75	-1.51708	13.5338	0
	High	IVSSNDVGHDEYSTQSLVK	1	2	1	Q62261		0	0	0.002169	2.34965	3	2078	-3.62482	14.1542	0
	High	EAASELLmR	1	2	1	Q62261	M8(Oxidation)	0	0	0.0007855	2.09169	2	1035.51	-0.257675	13.3745	0
	High	KKEIEELQSQAQALSQEGK	1	2	1	Q62261		0	0	0.003956	2.00848	3	2144.11	-5.39526	17.284	2
	High	LQALDTGWNELHK	1	2	1	Q62261		0	0	4.495e-05	1.92749	3	1524.78	-1.64056	17.0148	0
	High	ALVADSHPESER	1	2	1	Q62261		0	0.001	0.01163	2.94963	2	1310.63	-3.34443	10.895	0
	High	EGmQLISEKPETEAVVK	1	1	1	Q62261	M3(Oxidation)	0	0.001	0.02359	2.03063	3	1903.97	-0.989279	14.0049	0
	High	VQAVVAVAR	1	2	1	Q62261		0	0.007	0.08994	1.77102	2	912.562	-0.63888	12.1258	0
A3KGU5	Spectrin alpha chain, non-erythrocytic 1 OS=Mus musculus GN=Sptan1 PE=1 SV=1 - [A3KGU5_MOUSE]	56.4631	9.56	15	16	16	18	2457	282.72	5.32568
	A2	Sequence	# PSMs	# Proteins	# Protein Groups	Protein Group Accessions	Modifications	ΔCn	q-Value	PEP	XCorr	Charge	MH+ [Da]	ΔM [ppm]	RT [min]	# Missed Cleavages
	High	SSLSSAQADFNQLAELDR	1	11	1	A3KGU5		0	0	2.567e-13	5.22044	2	1951.93	-1.97292	20.3083	0
	High	EAALTNEEVGADLEQVEVLQK	2	7	1	A3KGU5		0	0	1.361e-08	4.55924	2	2285.15	-0.172013	19.8805	0
	High	GNAmVEEGHFAAEDVK	1	8	1	A3KGU5	M4(Oxidation)	0	0	0.0007098	4.01065	2	1719.76	-0.807814	12.8495	0
	High	LSDDNTIGQEEIQQR	1	8	1	A3KGU5		0	0	2.057e-07	3.9911	2	1745.83	-1.46581	12.958	0
	High	DLAALGDKVNSLGETAQR	1	7	1	A3KGU5		0	0	8.439e-05	3.41974	3	1857.97	-0.686854	16.9126	1
	High	EAFLNTEDKGDSLDSVEALIK	2	7	1	A3KGU5		0	0	0.0001034	3.41619	3	2294.14	-1.83773	21.2433	1
	High	NQALNTDNYGHDLASVQALQR	1	7	1	A3KGU5		0	0	8.531e-08	3.3927	3	2328.13	-0.264605	17.171	0
	High	mQHNLEQQIQAR	1	11	1	A3KGU5	M1(Oxidation)	0	0	0.004166	3.34964	3	1511.74	-0.053513	12.3989	0
	High	VLETAEDIQER	1	10	1	A3KGU5		0	0	0.0001273	3.08738	2	1302.65	-3.12253	12.5293	0
	High	LFGAAEVQR	1	9	1	A3KGU5		0	0	4.552e-05	2.72954	2	990.535	-1.75719	13.7341	0
	High	DLASVQALLR	1	9	1	A3KGU5		0	0	0.002338	2.43005	2	1085.63	0.790735	20.2137	0
	High	GVIDmGNSLIER	1	7	1	A3KGU5	M5(Oxidation)	0	0	0.00136	2.00818	2	1319.66	-0.22682	15.2522	0
	High	DVEDEETWIR	1	9	1	A3KGU5		0	0.002	0.0445	2.93782	2	1291.58	-0.492364	16.4804	0
	High	LQTASDESYKDPTNIQLSK	1	6	1	A3KGU5		0	0.006	0.05912	1.90513	3	2138.06	0.661778	14.1606	1
	High	SQLLGSAHEVQR	1	8	1	A3KGU5		0	0.007	0.09675	2.54844	2	1324.7	-0.749546	12.1019	0
	High	DLAALEDKVK	1	9	1	A3KGU5		0	0.007	0.06347	2.30236	2	1101.61	-2.36648	15.2582	1
Q922U2	Keratin, type II cytoskeletal 5 OS=Mus musculus GN=Krt5 PE=1 SV=1 - [K2C5_MOUSE]	43.7845	22.41	12	7	14	15	580	61.7286	7.75244
	A2	Sequence	# PSMs	# Proteins	# Protein Groups	Protein Group Accessions	Modifications	ΔCn	q-Value	PEP	XCorr	Charge	MH+ [Da]	ΔM [ppm]	RT [min]	# Missed Cleavages
	High	mFFDAELSQmQTHVSDTSVVLSmDNNR	1	1	1	Q922U2	M1(Oxidation); M10(Oxidation); M23(Oxidation)	0	0	4.342e-05	4.81893	3	3150.38	-1.00219	18.2269	0
	High	SLDLDSIIAEVK	2	9	2	Q922U2;P50446		0	0	2.123e-05	3.69313	2	1302.71	-0.886183	22.6955	0
	High	YEELQQTAGR	1	1	1	Q922U2		0	0	0.005051	3.68275	2	1194.57	-1.82475	11.2028	0
	High	LALDVEIATYR	1	13	3	Q3UV17;Q922U2;P50446		0	0	0.0001838	3.66342	2	1263.69	-0.964211	19.0301	0
	High	LRSEIDNVKK	1	2	1	Q922U2		0	0	0.0003987	3.44499	3	1201.69	-0.478972	11.3918	2
	High	VDALmDEINFmK	1	1	1	Q922U2	M5(Oxidation); M11(Oxidation)	0	0	4.527e-06	3.27976	2	1457.66	-5.08271	16.7832	0
	High	NKYEDEINKR	1	7	2	Q922U2;Q8VED5		0	0	0.003438	3.02855	3	1308.65	-1.32984	11.6198	2
	High	TEAESWYQTK	1	1	1	Q922U2		0	0	1.981e-05	3.00027	2	1242.56	-1.05892	13.1404	0
	High	KLLEGEEcR	1	22	5	B2RTP7;Q3UV17;Q922U2;P50446;E9Q1Z0	C8(Carbamidomethyl)	0	0	0.001829	2.71302	2	1133.56	-2.7434	11.2113	1
	High	TTAENEFVmLK	1	1	1	Q922U2	M9(Oxidation)	0	0	0.00663	2.47965	2	1298.63	-1.36222	15.5443	0
	High	LLEGEEcR	1	22	5	B2RTP7;Q3UV17;Q922U2;P50446;E9Q1Z0	C7(Carbamidomethyl)	0	0	0.004469	2.41396	2	1005.47	-1.69743	11.1297	0
	High	FASFIDK	1	26	7	B2RTP7;Q3UV17;P04104;Q922U2;P50446;Q8VED5;E9Q1Z0		0	0.001	0.02161	1.8466	2	827.429	-0.399239	14.9459	0
	High	LALDVEIATYRK	1	13	3	Q3UV17;Q922U2;P50446		0	0.001	0.01825	1.10808	3	1391.79	-1.08197	17.8068	1
	High	TTAENEFVmLKK	1	1	1	Q922U2	M9(Oxidation)	0	0.007	0.06966	3.59974	2	1426.72	-2.3517	14.3236	1
Q61781	Keratin, type I cytoskeletal 14 OS=Mus musculus GN=Krt14 PE=1 SV=2 - [K1C14_MOUSE]	41.8896	14.67	6	2	7	12	484	52.8339	5.17334
	A2	Sequence	# PSMs	# Proteins	# Protein Groups	Protein Group Accessions	Modifications	ΔCn	q-Value	PEP	XCorr	Charge	MH+ [Da]	ΔM [ppm]	RT [min]	# Missed Cleavages
	High	TEELNREVATNSELVQSGK	1	2	1	Q61781		0	0	3.044e-11	5.52809	3	2104.05	-1.14576	14.135	1
	High	GQVGGDVNVEmDAAPGVDLSR	2	3	2	Q61781;Q6IFX2	M11(Oxidation)	0	0	8.053e-14	5.06533	2	2101.98	-0.24424	15.5166	0
	High	GqVGGDVnVEmDAAPGVDLSR	1	3	2	Q61781;Q6IFX2	Q2(Deamidated); N8(Deamidated); M11(Oxidation)	0.0237	0	8.066e-09	4.52601	2	2103.96	5.43502	14.8416	0
	High	GQVGGDVNVEMDAAPGVDLSR	1	3	2	Q61781;Q6IFX2		0	0	1.346e-07	4.16144	2	2085.99	-0.811194	17.2902	0
	High	EVATNSELVQSGK	1	2	1	Q61781		0	0	1.458e-07	3.73776	2	1361.69	0.418948	11.4121	0
	High	TRLEQEIATYR	1	13	4	Q61781;Q9Z2K1;Q6IFX2;Q61782		0	0	0.0004129	3.41388	2	1379.73	0.109857	15.5872	1
	High	VTmQNLNDR	2	12	3	A2A513;Q61781;Q9Z2K1	M3(Oxidation)	0	0	0.0005196	3.29827	2	1106.52	-2.21523	10.6816	0
	High	VTMQNLNDR	1	12	3	A2A513;Q61781;Q9Z2K1		0	0.001	0.02557	2.9307	2	1090.53	-1.7615	11.6707	0
	High	LEQEIATYR	1	15	5	Q61781;Q9Z2K1;P19001;Q6IFX2;Q61782		0	0.001	0.009287	2.37792	2	1122.58	-1.60814	12.739	0
	High	ILNEMRDQYEK	1	3	2	Q61781;Q6IFX2		0	0.006	0.05671	2.51295	2	1438.7	-1.13139	12.9551	1
Q9Z1R9	MCG124046 OS=Mus musculus GN=Prss1 PE=2 SV=1 - [Q9Z1R9_MOUSE]	35.9212	12.2	10	2	2	13	246	26.1178	4.94482
	A2	Sequence	# PSMs	# Proteins	# Protein Groups	Protein Group Accessions	Modifications	ΔCn	q-Value	PEP	XCorr	Charge	MH+ [Da]	ΔM [ppm]	RT [min]	# Missed Cleavages
	High	LGEHNInVLEGNEQFIDAAK	6	1	1	Q9Z1R9	N7(Deamidated)	0	0	1.58247e-15	6.51135	3	2212.09	-0.0775229	18.1651	0
	High	LGEHNINVLEGNEQFIDAAK	3	1	1	Q9Z1R9		0	0	0.0018	4.51351	3	2211.1	-1.15085	18.5508	0
	High	TLNnDImLIK	2	10	1	Q9Z1R9	N4(Deamidated); M7(Oxidation)	0	0	0.0001674	3.00563	2	1191.63	-0.561251	16.9158	0
	High	TLNnDIMLIK	2	10	1	Q9Z1R9	N4(Deamidated)	0	0	0.001945	2.86476	2	1175.63	-1.05237	18.536	0
Q6IFX2	Keratin, type I cytoskeletal 42 OS=Mus musculus GN=Krt42 PE=1 SV=1 - [K1C42_MOUSE]	34.2677	16.37	4	3	7	10	452	50.1019	5.16064
	A2	Sequence	# PSMs	# Proteins	# Protein Groups	Protein Group Accessions	Modifications	ΔCn	q-Value	PEP	XCorr	Charge	MH+ [Da]	ΔM [ppm]	RT [min]	# Missed Cleavages
	High	GQVGGDVNVEmDAAPGVDLSR	2	3	2	Q61781;Q6IFX2	M11(Oxidation)	0	0	8.053e-14	5.06533	2	2101.98	-0.24424	15.5166	0
	High	GqVGGDVnVEmDAAPGVDLSR	1	3	2	Q61781;Q6IFX2	Q2(Deamidated); N8(Deamidated); M11(Oxidation)	0.0237	0	8.066e-09	4.52601	2	2103.96	5.43502	14.8416	0
	High	GQVGGDVNVEMDAAPGVDLSR	1	3	2	Q61781;Q6IFX2		0	0	1.346e-07	4.16144	2	2085.99	-0.811194	17.2902	0
	High	ALEEANADLEVK	1	1	1	Q6IFX2		0	0	7.059e-06	3.88382	2	1301.66	-1.62386	13.6202	0
	High	TRLEQEIATYR	1	13	4	Q61781;Q9Z2K1;Q6IFX2;Q61782		0	0	0.0004129	3.41388	2	1379.73	0.109857	15.5872	1
	High	TKYETELNLR	1	1	1	Q6IFX2		0	0.001	0.03701	2.88865	2	1266.67	0.473598	14.3803	1
	High	DAEEWFFTK	1	2	1	Q6IFX2		0	0.001	0.03926	2.84204	2	1172.53	-0.620214	20.1318	0
	High	LEQEIATYR	1	15	5	Q61781;Q9Z2K1;P19001;Q6IFX2;Q61782		0	0.001	0.009287	2.37792	2	1122.58	-1.60814	12.739	0
	High	ILNEMRDQYEK	1	3	2	Q61781;Q6IFX2		0	0.006	0.05671	2.51295	2	1438.7	-1.13139	12.9551	1
P50446	Keratin, type II cytoskeletal 6A OS=Mus musculus GN=Krt6a PE=2 SV=3 - [K2C6A_MOUSE]	31.5948	15.55	16	3	9	11	553	59.2986	7.94287
	A2	Sequence	# PSMs	# Proteins	# Protein Groups	Protein Group Accessions	Modifications	ΔCn	q-Value	PEP	XCorr	Charge	MH+ [Da]	ΔM [ppm]	RT [min]	# Missed Cleavages
	High	ALYEAELSqMqTHISDTSVVLSmDNNR	2	1	1	P50446	Q9(Deamidated); Q11(Deamidated); M23(Oxidation)	0	0	0.00065	5.11904	3	3070.41	2.28836	17.5848	0
	High	SLDLDSIIAEVK	2	9	2	Q922U2;P50446		0	0	2.123e-05	3.69313	2	1302.71	-0.886183	22.6955	0
	High	LALDVEIATYR	1	13	3	Q3UV17;Q922U2;P50446		0	0	0.0001838	3.66342	2	1263.69	-0.964211	19.0301	0
	High	TAAENEFVTLKK	1	1	1	P50446		0	0	0.0002565	3.11513	2	1350.73	0.230149	14.1266	1
	High	KLLEGEEcR	1	22	5	B2RTP7;Q3UV17;Q922U2;P50446;E9Q1Z0	C8(Carbamidomethyl)	0	0	0.001829	2.71302	2	1133.56	-2.7434	11.2113	1
	High	LLEGEEcR	1	22	5	B2RTP7;Q3UV17;Q922U2;P50446;E9Q1Z0	C7(Carbamidomethyl)	0	0	0.004469	2.41396	2	1005.47	-1.69743	11.1297	0
	High	FASFIDK	1	26	7	B2RTP7;Q3UV17;P04104;Q922U2;P50446;Q8VED5;E9Q1Z0		0	0.001	0.02161	1.8466	2	827.429	-0.399239	14.9459	0
	High	LALDVEIATYRK	1	13	3	Q3UV17;Q922U2;P50446		0	0.001	0.01825	1.10808	3	1391.79	-1.08197	17.8068	1
	High	QEIAEINR	1	9	1	P50446		0	0.007	0.08835	1.95189	2	972.509	-1.52624	11.5558	0
P26039	Talin-1 OS=Mus musculus GN=Tln1 PE=1 SV=2 - [TLN1_MOUSE]	29.9289	4.41	13	8	8	11	2541	269.653	6.17627
	A2	Sequence	# PSMs	# Proteins	# Protein Groups	Protein Group Accessions	Modifications	ΔCn	q-Value	PEP	XCorr	Charge	MH+ [Da]	ΔM [ppm]	RT [min]	# Missed Cleavages
	High	LLGEIAQGNENYAGIAAR	1	3	1	P26039		0	0	1.117e-05	4.7925	2	1859.96	-2.68233	17.2041	0
	High	LNEAAAGLNQAATELVQASR	1	3	1	P26039		0	0	1.105e-06	4.76054	2	2027.06	2.09392	20.2532	0
	High	LNEAAAGLNqAATELVQASR	3	3	1	P26039	Q10(Deamidated)	0	0	2.149e-09	4.53577	2	2028.05	7.50653	20.2256	0
	High	TLAESALQLLYTAK	1	5	1	P26039		0	0	5.149e-06	3.47652	2	1521.85	-0.721103	23.2381	0
	High	TmLESAGGLIQTAR	1	5	1	P26039	M2(Oxidation)	0	0	0.001165	2.58261	2	1463.75	-4.14886	15.2188	0
	High	VmVTNVTSLLK	1	13	1	P26039	M2(Oxidation)	0	0	0.006833	2.04409	2	1220.69	-1.80344	18.1956	0
	High	VLVQNAAGSQEK	1	5	1	P26039		0	0.001	0.009966	2.85424	2	1243.66	-0.916514	10.8922	0
	High	ALSTDPASPNLK	1	3	1	P26039		0	0.001	0.01947	2.29263	2	1213.64	-0.0756295	12.3932	0
	High	SIAAATSALVK	1	13	1	P26039		0	0.007	0.09271	2.59	2	1031.61	-1.46516	14.7896	0
B2RTP7	Krt2 protein OS=Mus musculus GN=Krt2 PE=2 SV=1 - [B2RTP7_MOUSE]	27.9779	7.21	7	4	7	10	707	70.8798	8.06006
	A2	Sequence	# PSMs	# Proteins	# Protein Groups	Protein Group Accessions	Modifications	ΔCn	q-Value	PEP	XCorr	Charge	MH+ [Da]	ΔM [ppm]	RT [min]	# Missed Cleavages
	High	LLRDYQELMNTK	2	3	1	B2RTP7		0	0	0.002407	3.82458	3	1523.79	-0.681836	16.7558	1
	High	GFSSGSAVVSGGSR	1	2	1	B2RTP7		0	0	1.455e-09	3.58062	2	1254.61	-1.67311	11.673	0
	High	KYEDEINKR	2	2	1	B2RTP7		0	0	0.0001969	2.94179	3	1194.61	-1.77023	11.0288	2
	High	KLLEGEEcR	1	22	5	B2RTP7;Q3UV17;Q922U2;P50446;E9Q1Z0	C8(Carbamidomethyl)	0	0	0.001829	2.71302	2	1133.56	-2.7434	11.2113	1
	High	LLEGEEcR	1	22	5	B2RTP7;Q3UV17;Q922U2;P50446;E9Q1Z0	C7(Carbamidomethyl)	0	0	0.004469	2.41396	2	1005.47	-1.69743	11.1297	0
	High	LLRDYQELmNTK	1	3	1	B2RTP7	M9(Oxidation)	0	0.001	0.009888	3.06647	2	1539.78	-1.58514	13.9147	1
	High	FASFIDK	1	26	7	B2RTP7;Q3UV17;P04104;Q922U2;P50446;Q8VED5;E9Q1Z0		0	0.001	0.02161	1.8466	2	827.429	-0.399239	14.9459	0
	High	DYQELMNTK	1	3	1	B2RTP7		0	0.006	0.05654	1.97074	2	1141.52	-1.80437	13.9989	0
P19096	Fatty acid synthase OS=Mus musculus GN=Fasn PE=1 SV=2 - [FAS_MOUSE]	23.8054	5.07	3	9	9	9	2504	272.257	6.58057
	A2	Sequence	# PSMs	# Proteins	# Protein Groups	Protein Group Accessions	Modifications	ΔCn	q-Value	PEP	XCorr	Charge	MH+ [Da]	ΔM [ppm]	RT [min]	# Missed Cleavages
	High	LGPVGGVFNLAmVLR	1	3	1	P19096	M12(Oxidation)	0	0	3.317e-08	3.91295	2	1558.88	-0.552826	24.0216	0
	High	FPQLDDTSFANSR	1	3	1	P19096		0	0	1.289e-06	3.39277	2	1497.69	-4.94801	17.2566	0
	High	FVFTPHmEAEcLSESTALQK	1	3	1	P19096	M7(Oxidation); C11(Carbamidomethyl)	0	0	0.0004169	2.73911	3	2341.09	0.529212	17.8432	0
	High	VAASVDLITK	1	2	1	P19096		0	0	0.003236	2.54291	2	1016.6	-0.791213	14.5636	0
	High	EQTAHAFVNVLTR	1	3	1	P19096		0	0	0.005542	2.49562	3	1485.78	-1.10468	16.9836	0
	High	GYTVLGVEGR	1	3	1	P19096		0	0	0.001127	1.85373	2	1050.56	-0.438486	14.9786	0
	High	LDPGSPELQQVLK	1	3	1	P19096		0	0.001	0.03086	2.52899	2	1423.78	-1.34995	17.4028	0
	High	LFDHPEVPTPPESASVSR	1	3	1	P19096		0	0.001	0.03953	2.06186	3	1964.97	0.883123	15.8748	0
	High	DTSFEQHVLLHTGGK	1	3	1	P19096		0	0.007	0.08311	2.27744	3	1668.83	-1.78716	15.8298	0
Q9Z2K1	Keratin, type I cytoskeletal 16 OS=Mus musculus GN=Krt16 PE=1 SV=3 - [K1C16_MOUSE]	23.7113	14.29	9	2	6	8	469	51.5743	5.19873
	A2	Sequence	# PSMs	# Proteins	# Protein Groups	Protein Group Accessions	Modifications	ΔCn	q-Value	PEP	XCorr	Charge	MH+ [Da]	ΔM [ppm]	RT [min]	# Missed Cleavages
	High	GQTGGDVNVEmDAAPGVDLSR	1	4	1	Q9Z2K1	M11(Oxidation)	0	0	8.967e-11	4.63804	2	2103.96	0.0984239	14.8416	0
	High	TRLEQEIATYR	1	13	4	Q61781;Q9Z2K1;Q6IFX2;Q61782		0	0	0.0004129	3.41388	2	1379.73	0.109857	15.5872	1
	High	VTmQNLNDR	2	12	3	A2A513;Q61781;Q9Z2K1	M3(Oxidation)	0	0	0.0005196	3.29827	2	1106.52	-2.21523	10.6816	0
	High	VTMQNLNDR	1	12	3	A2A513;Q61781;Q9Z2K1		0	0.001	0.02557	2.9307	2	1090.53	-1.7615	11.6707	0
	High	ILNEmRDQYEQmAEK	1	4	1	Q9Z2K1	M5(Oxidation); M12(Oxidation)	0	0.001	0.01325	2.80429	3	1929.87	-0.244248	11.4955	1
	High	ASLENSLEETK	1	4	1	Q9Z2K1		0	0.001	0.01213	2.50649	2	1220.6	-0.82451	13.2289	0
	High	LEQEIATYR	1	15	5	Q61781;Q9Z2K1;P19001;Q6IFX2;Q61782		0	0.001	0.009287	2.37792	2	1122.58	-1.60814	12.739	0
P04104	Keratin, type II cytoskeletal 1 OS=Mus musculus GN=Krt1 PE=1 SV=4 - [K2C1_MOUSE]	23.0724	4.87	5	3	4	9	637	65.5653	8.14795
	A2	Sequence	# PSMs	# Proteins	# Protein Groups	Protein Group Accessions	Modifications	ΔCn	q-Value	PEP	XCorr	Charge	MH+ [Da]	ΔM [ppm]	RT [min]	# Missed Cleavages
	High	FLEQQNQVLQTK	2	6	1	P04104		0	0	3.512e-05	4.57443	2	1475.78	-0.575879	13.8605	0
	High	FLEQQnQVLQTK	3	6	1	P04104	N6(Deamidated)	0	0	0.002229	3.64503	2	1476.76	-5.04406	14.4279	0
	High	TNAENEFVTIKK	1	1	1	P04104		0	0	5.579e-05	3.32654	2	1393.73	-1.49323	13.6382	1
	High	TNAENEFVTIK	1	1	1	P04104		0	0	5.588e-06	3.20307	2	1265.64	0.187629	14.943	0
	High	TNAEnEFVTIKK	1	1	1	P04104	N5(Deamidated)	0	0.001	0.01138	3.3819	2	1394.71	-1.14725	12.9906	1
	High	FASFIDK	1	26	7	B2RTP7;Q3UV17;P04104;Q922U2;P50446;Q8VED5;E9Q1Z0		0	0.001	0.02161	1.8466	2	827.429	-0.399239	14.9459	0
A2A513	Keratin, type I cytoskeletal 10 OS=Mus musculus GN=Krt10 PE=3 SV=1 - [A2A513_MOUSE]	22.9217	9.8	5	5	6	8	561	57.0067	5.07178
	A2	Sequence	# PSMs	# Proteins	# Protein Groups	Protein Group Accessions	Modifications	ΔCn	q-Value	PEP	XCorr	Charge	MH+ [Da]	ΔM [ppm]	RT [min]	# Missed Cleavages
	High	ALEESNYELEGK	1	2	1	A2A513		0	0	4.523e-06	3.7626	2	1381.65	-1.13434	13.0806	0
	High	QSLEASLAETEGR	1	2	1	A2A513		0	0	5.633e-05	3.58908	2	1390.68	-1.73793	15.1056	0
	High	VTmQNLNDR	2	12	3	A2A513;Q61781;Q9Z2K1	M3(Oxidation)	0	0	0.0005196	3.29827	2	1106.52	-2.21523	10.6816	0
	High	QSVEADINGLR	1	3	1	A2A513		0	0	0.004251	2.87797	2	1201.62	-1.19093	14.8908	0
	High	VTMQNLNDR	1	12	3	A2A513;Q61781;Q9Z2K1		0	0.001	0.02557	2.9307	2	1090.53	-1.7615	11.6707	0
	High	LENEIQTYR	1	2	1	A2A513		0	0.001	0.01127	2.74569	2	1165.58	-1.82063	12.4679	0
	High	QSVEADINGLRR	1	3	1	A2A513		0	0.001	0.0298	1.97577	2	1357.72	-0.458368	14.5818	1
E9Q983	Supervillin OS=Mus musculus GN=Svil PE=1 SV=1 - [E9Q983_MOUSE]	19.8759	5.21	7	6	6	6	1766	198.405	6.55127
	A2	Sequence	# PSMs	# Proteins	# Protein Groups	Protein Group Accessions	Modifications	ΔCn	q-Value	PEP	XCorr	Charge	MH+ [Da]	ΔM [ppm]	RT [min]	# Missed Cleavages
	High	NALTVAAEDSGVQTR	1	5	1	E9Q983		0	0	0.0001207	4.47286	2	1531.77	-0.229635	14.5907	0
	High	ESAEPGEPDSSTLSLAEK	1	4	1	E9Q983		0	0	7.371e-06	3.38041	2	1846.86	1.213	14.4811	0
	High	VAGIQETVLTVTGK	1	7	1	E9Q983		0	0	5.826e-07	3.18117	2	1415.8	-5.61764	18.0848	0
	High	GAANDSTQFTVAGR	1	7	1	E9Q983		0	0.001	0.007873	3.39825	2	1394.66	-2.80813	12.5848	0
	High	KFsLKEFGETTSEQTEVAAR	1	5	1	E9Q983	S3(Phospho)	0	0.001	0.01804	2.90329	3	2338.09	-1.77712	17.5663	2
	High	DDLLQEYTEQR	1	7	1	E9Q983		0	0.007	0.09603	2.53987	2	1409.66	0.854022	17.7053	0
E9Q1Z0	Protein 4732456N10Rik OS=Mus musculus GN=4732456N10Rik PE=3 SV=1 - [E9Q1Z0_MOUSE]	16.2302	7.25	10	1	5	6	538	58.1882	8.25049
	A2	Sequence	# PSMs	# Proteins	# Protein Groups	Protein Group Accessions	Modifications	ΔCn	q-Value	PEP	XCorr	Charge	MH+ [Da]	ΔM [ppm]	RT [min]	# Missed Cleavages
	High	SLnLDSIIAEVK	2	3	1	E9Q1Z0	N3(Deamidated)	0	0	2.12e-05	3.69313	2	1302.71	-0.883113	22.6955	0
	High	LALDIEIATYR	1	7	1	E9Q1Z0		0	0	0.0007771	3.44379	2	1277.71	-0.495508	20.2692	0
	High	KLLEGEEcR	1	22	5	B2RTP7;Q3UV17;Q922U2;P50446;E9Q1Z0	C8(Carbamidomethyl)	0	0	0.001829	2.71302	2	1133.56	-2.7434	11.2113	1
	High	LLEGEEcR	1	22	5	B2RTP7;Q3UV17;Q922U2;P50446;E9Q1Z0	C7(Carbamidomethyl)	0	0	0.004469	2.41396	2	1005.47	-1.69743	11.1297	0
	High	FASFIDK	1	26	7	B2RTP7;Q3UV17;P04104;Q922U2;P50446;Q8VED5;E9Q1Z0		0	0.001	0.02161	1.8466	2	827.429	-0.399239	14.9459	0
Q3UV17	Keratin, type II cytoskeletal 2 oral OS=Mus musculus GN=Krt76 PE=2 SV=1 - [K22O_MOUSE]	15.3852	6.06	6	1	6	7	594	62.806	8.42627
	A2	Sequence	# PSMs	# Proteins	# Protein Groups	Protein Group Accessions	Modifications	ΔCn	q-Value	PEP	XCorr	Charge	MH+ [Da]	ΔM [ppm]	RT [min]	# Missed Cleavages
	High	LALDVEIATYR	1	13	3	Q3UV17;Q922U2;P50446		0	0	0.0001838	3.66342	2	1263.69	-0.964211	19.0301	0
	High	KLLEGEEcR	1	22	5	B2RTP7;Q3UV17;Q922U2;P50446;E9Q1Z0	C8(Carbamidomethyl)	0	0	0.001829	2.71302	2	1133.56	-2.7434	11.2113	1
	High	LLEGEEcR	1	22	5	B2RTP7;Q3UV17;Q922U2;P50446;E9Q1Z0	C7(Carbamidomethyl)	0	0	0.004469	2.41396	2	1005.47	-1.69743	11.1297	0
	High	AQYEDIAQK	2	1	1	Q3UV17		0	0	0.0002244	1.82971	2	1065.52	-1.81945	7.64285	0
	High	FASFIDK	1	26	7	B2RTP7;Q3UV17;P04104;Q922U2;P50446;Q8VED5;E9Q1Z0		0	0.001	0.02161	1.8466	2	827.429	-0.399239	14.9459	0
	High	LALDVEIATYRK	1	13	3	Q3UV17;Q922U2;P50446		0	0.001	0.01825	1.10808	3	1391.79	-1.08197	17.8068	1
O88493	Type VI collagen alpha 3 subunit OS=Mus musculus GN=Col6a3 PE=2 SV=1 - [O88493_MOUSE]	14.7574	2.48	6	5	5	5	2657	286.706	8.60205
	A2	Sequence	# PSMs	# Proteins	# Protein Groups	Protein Group Accessions	Modifications	ΔCn	q-Value	PEP	XCorr	Charge	MH+ [Da]	ΔM [ppm]	RT [min]	# Missed Cleavages
	High	SVEDAQDVSLALTQK	1	4	1	O88493		0	0	0.0001188	3.82386	2	1603.82	-1.44669	16.2605	0
	High	LSDAGITPLFLTSQEDR	1	4	1	O88493		0	0	4.964e-05	3.39382	2	1862.95	-1.18526	20.8322	0
	High	VPQIAFVITGGK	1	4	1	O88493		0	0	0.0003012	2.74056	2	1229.73	0.766502	19.722	0
	High	VAIAQFSDDVR	1	5	1	O88493		0	0	0.002153	2.59997	2	1220.63	-0.533274	15.903	0
	High	VVESLDVGPDR	1	5	1	O88493		0	0	0.002945	2.19921	2	1185.61	-1.58808	13.5979	0
Q792Z1	MCG140784 OS=Mus musculus GN=Try10 PE=2 SV=1 - [Q792Z1_MOUSE]	12.9027	14.63	1	1	2	4	246	26.2039	5.8335
	A2	Sequence	# PSMs	# Proteins	# Protein Groups	Protein Group Accessions	Modifications	ΔCn	q-Value	PEP	XCorr	Charge	MH+ [Da]	ΔM [ppm]	RT [min]	# Missed Cleavages
	High	LGEHnINVLEGNEQFIDAANIIKHPK	1	1	1	Q792Z1	N5(Deamidated)	0	0	0.0001145	3.97954	4	2914.5	-0.878604	22.82	1
	High	TLDNDImLIK	1	2	2	Q792Z1;Q7M754	M7(Oxidation)	0.0266	0	2.405e-05	2.93391	2	1191.63	-0.564608	16.9158	0
	High	TLDNDIMLIK	1	2	2	Q792Z1;Q7M754		0.028	0	0.001093	2.77561	2	1175.63	-1.05577	18.536	0
	High	LGEHNInVLEGnEQFIDAANIIKHPK	1	1	1	Q792Z1	N7(Deamidated); N12(Deamidated)	0	0.007	0.07501	3.21366	4	2915.51	6.53009	22.7617	1
Q61782	Type I epidermal keratin mRNA, 3'end (Fragment) OS=Mus musculus PE=2 SV=1 - [Q61782_MOUSE]	11.6855	35.48	3	1	3	3	93	10.6554	6.30322
	A2	Sequence	# PSMs	# Proteins	# Protein Groups	Protein Group Accessions	Modifications	ΔCn	q-Value	PEP	XCorr	Charge	MH+ [Da]	ΔM [ppm]	RT [min]	# Missed Cleavages
	High	LLEGEDAHLSSSQFSSGSQSSR	1	1	1	Q61782		0	0	2.265e-15	5.89369	3	2309.06	-1.34385	14.1761	0
	High	TRLEQEIATYR	1	13	4	Q61781;Q9Z2K1;Q6IFX2;Q61782		0	0	0.0004129	3.41388	2	1379.73	0.109857	15.5872	1
	High	LEQEIATYR	1	15	5	Q61781;Q9Z2K1;P19001;Q6IFX2;Q61782		0	0.001	0.009287	2.37792	2	1122.58	-1.60814	12.739	0
P07724	Serum albumin OS=Mus musculus GN=Alb PE=1 SV=3 - [ALBU_MOUSE]	11.0024	4.44	1	2	2	3	608	68.6477	6.07471
	A2	Sequence	# PSMs	# Proteins	# Protein Groups	Protein Group Accessions	Modifications	ΔCn	q-Value	PEP	XCorr	Charge	MH+ [Da]	ΔM [ppm]	RT [min]	# Missed Cleavages
	High	LGEYGFQNAILVR	2	1	1	P07724		0	0	0.0004543	4.12216	2	1479.8	-0.0294264	19.5738	0
	High	EccHGDLLEcADDR	1	1	1	P07724	C2(Carbamidomethyl); C3(Carbamidomethyl); C10(Carbamidomethyl)	0	0	0.0003946	3.37523	3	1749.66	-1.5592	13.2817	0
P19001	Keratin, type I cytoskeletal 19 OS=Mus musculus GN=Krt19 PE=1 SV=1 - [K1C19_MOUSE]	10.2091	6.7	3	2	3	4	403	44.5147	5.38916
	A2	Sequence	# PSMs	# Proteins	# Protein Groups	Protein Group Accessions	Modifications	ΔCn	q-Value	PEP	XCorr	Charge	MH+ [Da]	ΔM [ppm]	RT [min]	# Missed Cleavages
	High	LASYLDKVR	2	5	1	P19001		0	0.001	0.008591	3.12661	2	1064.61	-0.573705	13.9602	1
	High	LEQEIATYR	1	15	5	Q61781;Q9Z2K1;P19001;Q6IFX2;Q61782		0	0.001	0.009287	2.37792	2	1122.58	-1.60814	12.739	0
	High	IVLqIDNAR	1	2	1	P19001	Q4(Deamidated)	0	0.001	0.03086	1.92644	2	1042.59	-0.261382	15.1181	0
F8VQJ3	Laminin subunit gamma-1 OS=Mus musculus GN=Lamc1 PE=4 SV=1 - [F8VQJ3_MOUSE]	9.66437	2.55	8	3	3	3	1607	177.074	5.18604
	A2	Sequence	# PSMs	# Proteins	# Protein Groups	Protein Group Accessions	Modifications	ΔCn	q-Value	PEP	XCorr	Charge	MH+ [Da]	ΔM [ppm]	RT [min]	# Missed Cleavages
	High	EAQLALGNAAADATEAK	1	6	1	F8VQJ3		0	0	3.372e-07	3.98153	2	1643.83	1.29569	14.9245	0
	High	NTIEETGILAER	1	4	1	F8VQJ3		0	0	0.0001858	2.91111	2	1345.7	-0.54644	15.5255	0
	High	SQEcYFDPELYR	1	3	1	F8VQJ3	C4(Carbamidomethyl)	0	0.007	0.07932	2.77173	2	1606.68	-1.45824	18.1152	0
Q8VED5	Keratin, type II cytoskeletal 79 OS=Mus musculus GN=Krt79 PE=2 SV=2 - [K2C79_MOUSE]	8.85537	5.46	6	1	3	3	531	57.5168	7.69385
	A2	Sequence	# PSMs	# Proteins	# Protein Groups	Protein Group Accessions	Modifications	ΔCn	q-Value	PEP	XCorr	Charge	MH+ [Da]	ΔM [ppm]	RT [min]	# Missed Cleavages
	High	NLDLDSIIAEVK	1	1	1	Q8VED5		0	0	0.0003177	3.98021	2	1329.72	-1.62947	22.641	0
	High	NKYEDEINKR	1	7	2	Q922U2;Q8VED5		0	0	0.003438	3.02855	3	1308.65	-1.32984	11.6198	2
	High	FASFIDK	1	26	7	B2RTP7;Q3UV17;P04104;Q922U2;P50446;Q8VED5;E9Q1Z0		0	0.001	0.02161	1.8466	2	827.429	-0.399239	14.9459	0
Q7M754	Try10-like trypsinogen OS=Mus musculus GN=Gm5409 PE=2 SV=1 - [Q7M754_MOUSE]	8.28847	15.45	1	1	2	3	246	26.5138	5.05908
	A2	Sequence	# PSMs	# Proteins	# Protein Groups	Protein Group Accessions	Modifications	ΔCn	q-Value	PEP	XCorr	Charge	MH+ [Da]	ΔM [ppm]	RT [min]	# Missed Cleavages
	High	TLDNDImLIK	1	2	2	Q792Z1;Q7M754	M7(Oxidation)	0.0266	0	2.405e-05	2.93391	2	1191.63	-0.564608	16.9158	0
	High	TLDNDIMLIK	1	2	2	Q792Z1;Q7M754		0.028	0	0.001093	2.77561	2	1175.63	-1.05577	18.536	0
	High	LGEHNInVLEGnEQFIDAAnIVKHPKFK	1	1	1	Q7M754	N7(Deamidated); N12(Deamidated); N20(Deamidated)	0	0.001	0.01155	2.57895	4	3177.6	-7.81309	22.1197	2
A1L0X5	Krt78 protein (Fragment) OS=Mus musculus GN=Krt78 PE=2 SV=1 - [A1L0X5_MOUSE]	6.48864	2.85	5	2	2	3	492	54.7393	6.30322
	A2	Sequence	# PSMs	# Proteins	# Protein Groups	Protein Group Accessions	Modifications	ΔCn	q-Value	PEP	XCorr	Charge	MH+ [Da]	ΔM [ppm]	RT [min]	# Missed Cleavages
	High	SLNNQFASFIDK	1	5	1	A1L0X5		0	0	0.001257	3.22687	2	1383.69	-0.621943	19.0218	0
	High	SLNNQFASFIDKVR	2	5	1	A1L0X5		0	0	0.002741	1.79772	3	1638.86	-0.151329	21.268	1
E9Q5F4	Actin, cytoplasmic 1 (Fragment) OS=Mus musculus GN=Actb PE=3 SV=1 - [E9Q5F4_MOUSE]	6.01895	12.83	39	2	2	2	265	29.4236	5.10986
	A2	Sequence	# PSMs	# Proteins	# Protein Groups	Protein Group Accessions	Modifications	ΔCn	q-Value	PEP	XCorr	Charge	MH+ [Da]	ΔM [ppm]	RT [min]	# Missed Cleavages
	High	SYELPDGQVITIGNER	1	35	1	E9Q5F4		0	0	5.743e-07	3.28929	2	1790.89	-1.28163	19.2793	0
	High	VAPEEHPVLLTEAPLNPK	1	21	1	E9Q5F4		0	0.001	0.01135	2.72965	3	1954.06	-1.66263	17.4459	0
A5JUZ1	Ubiqutin subunit 1 (Fragment) OS=Mus musculus GN=Ubc PE=2 SV=1 - [A5JUZ1_MOUSE]	5.72045	32.89	19	2	2	2	76	8.55962	7.25439
	A2	Sequence	# PSMs	# Proteins	# Protein Groups	Protein Group Accessions	Modifications	ΔCn	q-Value	PEP	XCorr	Charge	MH+ [Da]	ΔM [ppm]	RT [min]	# Missed Cleavages
	High	TITLEVEPSDTIENVK	1	18	1	A5JUZ1		0	0	0.000659	3.40196	2	1787.93	0.292374	17.7792	0
	High	ESTLHLVLR	1	19	1	A5JUZ1		0	0.007	0.07339	2.31849	2	1067.62	0.880837	16.5109	0
D3YVS6	Protein G6b OS=Mus musculus GN=G6b PE=4 SV=1 - [D3YVS6_MOUSE]	5.03863	10.66	2	2	2	2	197	21.1853	10.0962
	A2	Sequence	# PSMs	# Proteins	# Protein Groups	Protein Group Accessions	Modifications	ΔCn	q-Value	PEP	XCorr	Charge	MH+ [Da]	ΔM [ppm]	RT [min]	# Missed Cleavages
	High	GTPTVLQHFSGR	1	2	1	D3YVS6		0	0	0.0004428	2.66735	2	1299.68	-0.840524	15.158	0
	High	TVLQVLGDK	1	2	1	D3YVS6		0	0.006	0.06119	2.37129	2	972.572	-0.978368	16.0626	0
Q3U0Q9	Putative uncharacterized protein (Fragment) OS=Mus musculus GN=Tns1 PE=2 SV=1 - [Q3U0Q9_MOUSE]	4.72679	3.47	5	2	2	2	749	78.098	9.51025
	A2	Sequence	# PSMs	# Proteins	# Protein Groups	Protein Group Accessions	Modifications	ΔCn	q-Value	PEP	XCorr	Charge	MH+ [Da]	ΔM [ppm]	RT [min]	# Missed Cleavages
	High	TVGTNTPPSPGFGR	1	5	1	Q3U0Q9		0	0.003	0.05044	2.98889	2	1387.69	-2.94798	12.8557	0
	High	TPFQPmLDSSIR	1	3	1	Q3U0Q9	M6(Oxidation)	0	0.007	0.07743	1.73789	2	1407.69	-1.10822	16.0951	0
Q9QZZ4	Unconventional myosin-XV OS=Mus musculus GN=Myo15a PE=1 SV=2 - [MYO15_MOUSE]	3.65752	0.57	1	1	1	1	3511	395.372	9.15869
	A2	Sequence	# PSMs	# Proteins	# Protein Groups	Protein Group Accessions	Modifications	ΔCn	q-Value	PEP	XCorr	Charge	MH+ [Da]	ΔM [ppm]	RT [min]	# Missed Cleavages
	High	FGGRLEFPSNMELRAMLAGR	1	1	1	Q9QZZ4		0	0.001	0.02799	3.65752	3	2252.13	-6.41181	19.4616	2
Q9CPN9	Protein 2210010C04Rik OS=Mus musculus GN=2210010C04Rik PE=2 SV=1 - [Q9CPN9_MOUSE]	3.65727	4.86	2	1	1	1	247	26.405	7.92822
	A2	Sequence	# PSMs	# Proteins	# Protein Groups	Protein Group Accessions	Modifications	ΔCn	q-Value	PEP	XCorr	Charge	MH+ [Da]	ΔM [ppm]	RT [min]	# Missed Cleavages
	High	YVNWIQQTIAAN	1	2	1	Q9CPN9		0	0	0.00122	3.65727	2	1420.72	-0.264713	21.5501	0
P17897	Lysozyme C-1 OS=Mus musculus GN=Lyz1 PE=1 SV=1 - [LYZ1_MOUSE]	3.64444	8.11	1	1	1	1	148	16.7834	9.40771
	A2	Sequence	# PSMs	# Proteins	# Protein Groups	Protein Group Accessions	Modifications	ΔCn	q-Value	PEP	XCorr	Charge	MH+ [Da]	ΔM [ppm]	RT [min]	# Missed Cleavages
	High	STDYGIFQINSR	1	1	1	P17897		0	0	3.769e-06	3.64444	2	1400.68	-0.379859	18.1683	0
P15508	Spectrin beta chain, erythrocytic OS=Mus musculus GN=Sptb PE=1 SV=4 - [SPTB1_MOUSE]	3.29838	0.7	5	1	1	1	2128	245.098	5.32568
	A2	Sequence	# PSMs	# Proteins	# Protein Groups	Protein Group Accessions	Modifications	ΔCn	q-Value	PEP	XCorr	Charge	MH+ [Da]	ΔM [ppm]	RT [min]	# Missed Cleavages
	High	LLSGEDVGQDEGATR	1	5	1	P15508		0	0	2.758e-05	3.29838	2	1546.73	-1.82728	12.4285	0
Q62411	Nebulin (Fragment) OS=Mus musculus GN=Neb PE=2 SV=1 - [Q62411_MOUSE]	3.23249	3.09	5	1	1	1	1358	157.836	9.11475
	A2	Sequence	# PSMs	# Proteins	# Protein Groups	Protein Group Accessions	Modifications	ΔCn	q-Value	PEP	XCorr	Charge	MH+ [Da]	ΔM [ppm]	RT [min]	# Missed Cleavages
	High	FTSVTDSLEQVLAK	1	5	1	Q62411		0	0	0.0009689	3.23249	2	1537.81	-3.12356	21.1752	0
Q8CC88	von Willebrand factor A domain-containing protein 8 OS=Mus musculus GN=Vwa8 PE=2 SV=2 - [VWA8_MOUSE]	3.11668	0.79	1	1	1	1	1905	213.287	6.59521
	A2	Sequence	# PSMs	# Proteins	# Protein Groups	Protein Group Accessions	Modifications	ΔCn	q-Value	PEP	XCorr	Charge	MH+ [Da]	ΔM [ppm]	RT [min]	# Missed Cleavages
	High	NLADQGIINYPYSTR	1	1	1	Q8CC88		0	0	0.0003725	3.11668	2	1724.86	-3.03981	17.5351	0
B7ZNH7	Collagen alpha-1(XIV) chain OS=Mus musculus GN=Col14a1 PE=2 SV=1 - [B7ZNH7_MOUSE]	3.09445	0.78	3	1	1	1	1794	192.635	5.09717
	A2	Sequence	# PSMs	# Proteins	# Protein Groups	Protein Group Accessions	Modifications	ΔCn	q-Value	PEP	XCorr	Charge	MH+ [Da]	ΔM [ppm]	RT [min]	# Missed Cleavages
	High	LQELEGPSVSImQK	1	3	1	B7ZNH7	M12(Oxidation)	0	0	7.578e-05	3.09445	2	1574.81	-0.245535	14.9545	0
Q8C9Y7	Putative uncharacterized protein OS=Mus musculus GN=Ect2 PE=2 SV=1 - [Q8C9Y7_MOUSE]	2.95086	2.17	2	1	1	1	692	78.5277	5.63037
	A2	Sequence	# PSMs	# Proteins	# Protein Groups	Protein Group Accessions	Modifications	ΔCn	q-Value	PEP	XCorr	Charge	MH+ [Da]	ΔM [ppm]	RT [min]	# Missed Cleavages
	High	KSVSLLSLsTPNsNR	1	2	1	Q8C9Y7	S9(Phospho); S13(Phospho)	0	0	0.006552	2.95086	3	1762.81	-3.66416	22.6681	1
B0V2N8	Annexin (Fragment) OS=Mus musculus GN=Anxa2 PE=1 SV=1 - [B0V2N8_MOUSE]	2.88935	7.95	5	1	1	1	176	19.5841	5.96045
	A2	Sequence	# PSMs	# Proteins	# Protein Groups	Protein Group Accessions	Modifications	ΔCn	q-Value	PEP	XCorr	Charge	MH+ [Da]	ΔM [ppm]	RT [min]	# Missed Cleavages
	High	GVDEVTIVNILTNR	1	5	1	B0V2N8		0	0.001	0.01185	2.88935	2	1542.85	-2.28858	22.6027	0
Q5SXA5	TOM1-like protein 2 OS=Mus musculus GN=Tom1l2 PE=4 SV=1 - [Q5SXA5_MOUSE]	2.66021	4.38	2	1	1	1	457	50.0388	4.67822
	A2	Sequence	# PSMs	# Proteins	# Protein Groups	Protein Group Accessions	Modifications	ΔCn	q-Value	PEP	XCorr	Charge	MH+ [Da]	ΔM [ppm]	RT [min]	# Missed Cleavages
	High	GIEFPmADLDALSPIHTPQR	1	2	1	Q5SXA5	M6(Oxidation)	0	0.007	0.06962	2.66021	3	2224.08	-9.93954	21.9695	0
Q8CD19	LanC-like protein 3 OS=Mus musculus GN=Lancl3 PE=2 SV=2 - [LANC3_MOUSE]	2.59207	2.86	1	1	1	1	420	46.4445	7.04932
	A2	Sequence	# PSMs	# Proteins	# Protein Groups	Protein Group Accessions	Modifications	ΔCn	q-Value	PEP	XCorr	Charge	MH+ [Da]	ΔM [ppm]	RT [min]	# Missed Cleavages
	High	LAqEVLtPTQIK	1	1	1	Q8CD19	Q3(Deamidated); T7(Phospho)	0	0.003	0.05036	2.59207	2	1421.73	-0.165345	14.997	0
Q8K2I5	Cltc protein (Fragment) OS=Mus musculus GN=Cltc PE=2 SV=1 - [Q8K2I5_MOUSE]	2.4644	3.77	5	1	1	1	504	58.5184	5.51611
	A2	Sequence	# PSMs	# Proteins	# Protein Groups	Protein Group Accessions	Modifications	ΔCn	q-Value	PEP	XCorr	Charge	MH+ [Da]	ΔM [ppm]	RT [min]	# Missed Cleavages
	High	LASTLVHLGEYQAAVDGAR	1	5	1	Q8K2I5		0	0.007	0.06628	2.4644	3	1971.03	-1.41793	18.4825	0
F6WYC8	Protein Gm5097 (Fragment) OS=Mus musculus GN=Gm5097 PE=4 SV=1 - [F6WYC8_MOUSE]	2.40835	6.94	2	1	1	1	245	27.4002	9.0708
	A2	Sequence	# PSMs	# Proteins	# Protein Groups	Protein Group Accessions	Modifications	ΔCn	q-Value	PEP	XCorr	Charge	MH+ [Da]	ΔM [ppm]	RT [min]	# Missed Cleavages
	High	YDLPAIInFILEKtGqK	1	2	1	F6WYC8	N8(Deamidated); T14(Phospho); Q16(Deamidated)	0	0.006	0.05972	2.40835	4	2045.03	1.18326	24.1077	1
A2AW79	Dedicator of cytokinesis protein 7 (Fragment) OS=Mus musculus GN=Dock7 PE=1 SV=1 - [A2AW79_MOUSE]	2.34751	6.64	5	1	1	1	241	26.2824	6.88818
	A2	Sequence	# PSMs	# Proteins	# Protein Groups	Protein Group Accessions	Modifications	ΔCn	q-Value	PEP	XCorr	Charge	MH+ [Da]	ΔM [ppm]	RT [min]	# Missed Cleavages
	High	IGDmRIMENNLESELK	1	5	1	A2AW79	M4(Oxidation)	0	0.001	0.038	2.34751	3	1907.92	-0.1469	19.3808	1
Q69ZH8	MKIAA1509 protein (Fragment) OS=Mus musculus GN=mKIAA1509 PE=4 SV=1 - [Q69ZH8_MOUSE]	2.32523	0.85	3	1	1	1	1178	130.862	7.44482
	A2	Sequence	# PSMs	# Proteins	# Protein Groups	Protein Group Accessions	Modifications	ΔCn	q-Value	PEP	XCorr	Charge	MH+ [Da]	ΔM [ppm]	RT [min]	# Missed Cleavages
	High	QYIDKLnALR	1	3	1	Q69ZH8	N7(Deamidated)	0	0.007	0.0684	2.32523	3	1234.68	-0.376453	14.094	1
Z4YJF5	Myomesin-1 OS=Mus musculus GN=Myom1 PE=4 SV=1 - [Z4YJF5_MOUSE]	2.30154	0.64	2	1	1	1	1569	175.371	6.31592
	A2	Sequence	# PSMs	# Proteins	# Protein Groups	Protein Group Accessions	Modifications	ΔCn	q-Value	PEP	XCorr	Charge	MH+ [Da]	ΔM [ppm]	RT [min]	# Missed Cleavages
	High	FPVTGLIEGR	1	2	1	Z4YJF5		0	0.001	0.02035	2.30154	2	1088.61	-1.4765	17.8937	0
Q3TR97	Putative uncharacterized protein (Fragment) OS=Mus musculus GN=Gemin5 PE=2 SV=1 - [Q3TR97_MOUSE]	2.22307	0.82	7	1	1	1	854	94.9848	6.21436
	A2	Sequence	# PSMs	# Proteins	# Protein Groups	Protein Group Accessions	Modifications	ΔCn	q-Value	PEP	XCorr	Charge	MH+ [Da]	ΔM [ppm]	RT [min]	# Missed Cleavages
	High	LSQFKPK	1	7	1	Q3TR97		0	0.009	0.1058	2.22307	2	847.503	-0.29117	11.2836	0
Q9CX93	Tmtc2 protein OS=Mus musculus GN=Tmtc2 PE=2 SV=1 - [Q9CX93_MOUSE]	2.22012	6.47	1	1	1	1	139	15.7472	8.32373
	A2	Sequence	# PSMs	# Proteins	# Protein Groups	Protein Group Accessions	Modifications	ΔCn	q-Value	PEP	XCorr	Charge	MH+ [Da]	ΔM [ppm]	RT [min]	# Missed Cleavages
	High	TcGEELTTR	1	1	1	Q9CX93	C2(Carbamidomethyl)	0	0.001	0.01813	2.22012	2	1066.48	-3.72964	11.1474	0
E9PVG8	Protein 9530053A07Rik OS=Mus musculus GN=9530053A07Rik PE=4 SV=1 - [E9PVG8_MOUSE]	1.94797	0.35	3	1	1	1	2581	280.044	6.17627
	A2	Sequence	# PSMs	# Proteins	# Protein Groups	Protein Group Accessions	Modifications	ΔCn	q-Value	PEP	XCorr	Charge	MH+ [Da]	ΔM [ppm]	RT [min]	# Missed Cleavages
	High	ISVINGGSK	1	3	1	E9PVG8		0	0	0.001635	1.94797	2	874.498	-1.17064	13.2941	0
Q6VNB8	WD repeat and FYVE domain-containing protein 3 OS=Mus musculus GN=Wdfy3 PE=1 SV=1 - [WDFY3_MOUSE]	0	0.37	2	1	1	2	3508	392.088	6.80029
	A2	Sequence	# PSMs	# Proteins	# Protein Groups	Protein Group Accessions	Modifications	ΔCn	q-Value	PEP	XCorr	Charge	MH+ [Da]	ΔM [ppm]	RT [min]	# Missed Cleavages
	High	TnINLQAcEELVR	2	2	1	Q6VNB8	N2(Deamidated); C8(Carbamidomethyl)	0	0.001	0.02473	2.2966	4	1560.77	-0.940999	15.6863	0
Q4VAF6	Traf3ip3 protein OS=Mus musculus GN=Traf3ip3 PE=2 SV=1 - [Q4VAF6_MOUSE]	0	3.88	4	1	1	1	206	23.0375	10.2866
	A2	Sequence	# PSMs	# Proteins	# Protein Groups	Protein Group Accessions	Modifications	ΔCn	q-Value	PEP	XCorr	Charge	MH+ [Da]	ΔM [ppm]	RT [min]	# Missed Cleavages
	High	EsLPGAnK	1	4	1	Q4VAF6	S2(Phospho); N7(Deamidated)	0	0.004	0.05369	0.780301	2	896.375	-1.09176	36.5404	0
