# Supplementary material for: Heparan sulfates are critical regulators of the inhibitory megakaryocyte-platelet receptor G6b-B
Source: eLife. 2019 Aug 22;8:e46840. doi: 10.7554/eLife.46840 (PMC6742478; doi:10.7554/eLife.46840)
Supplement: Table 1—source data 3. [file elife-46840-table1-data3.xls]

## Sheet: Sheet1
	Description	Score	Coverage	# Proteins	# Unique Peptides	# Peptides	# PSMs	# AAs	MW [kDa]	calc. pI
B7FAV1	Filamin, alpha (Fragment) OS=Mus musculus GN=Flna PE=1 SV=1 - [B7FAV1_MOUSE]	73.3215	11.38	8	17	18	20	2583	274.457	5.97314
	A2	Sequence	# PSMs	# Proteins	# Protein Groups	Protein Group Accessions	Modifications	ΔCn	q-Value	PEP	XCorr	Charge	MH+ [Da]	ΔM [ppm]	RT [min]	# Missed Cleavages
	High	LQVEPAVDTSGVQcYGPGIEGQGVFR	1	5	1	B7FAV1	C14(Carbamidomethyl)	0	0	8.769e-07	6.41404	3	2763.35	2.30003	19.0639	0
	High	GLVEPVDVVDNADGTQTVNYVPSR	2	5	1	B7FAV1		0	0	4.787e-07	5.11504	2	2544.27	3.11339	18.4173	0
	High	DAGEGLLAVQITDPEGKPK	1	5	1	B7FAV1		0	0	2.078e-07	4.78007	2	1938.02	2.66126	17.1032	0
	High	VTAQGPGLEPSGNIANK	1	6	1	B7FAV1		0	0	3.396e-06	4.02211	2	1652.87	2.8596	12.3389	0
	High	DAGEGGLSLAIEGPSK	1	5	1	B7FAV1		0	0	4.569e-06	3.94655	2	1500.76	3.46734	16.877	0
	High	IANLQTDLSDGLR	1	5	1	B7FAV1		0	0	7.666e-05	3.90533	2	1415.75	2.49882	16.8327	0
	High	VTYcPTEPGNYIINIK	1	6	1	B7FAV1	C4(Carbamidomethyl)	0	0	0.0003924	3.86807	2	1881.95	3.63802	18.294	0
	High	ASGPGLNTTGVPASLPVEFTIDAK	2	5	1	B7FAV1		0	0	0.0002966	3.75241	2	2342.23	2.70294	20.9246	0
	High	ANLPQSFQVDTSK	1	5	1	B7FAV1		0	0	0.002362	3.55531	2	1434.73	2.85541	14.3453	0
	High	YGGDEIPFSPYR	1	5	1	B7FAV1		0	0	0.002852	3.54196	2	1400.65	1.63276	17.3183	0
	High	AYGPGIEPTGNmVK	1	6	1	B7FAV1	M12(Oxidation)	0	0	0.008102	3.35471	2	1449.71	1.90559	12.2468	0
	High	LLGWIQNKLPQLPITNFSR	1	6	1	B7FAV1		0	0	0.02538	3.31978	3	2238.28	2.65433	22.2758	1
	High	SPFSVGVSPSLDLSK	1	6	1	B7FAV1		0	0	0.007634	3.10098	2	1519.8	2.90419	18.5222	0
	High	YNDQHIPGSPFTAR	1	5	1	B7FAV1		0	0	0.00114	3.08684	3	1602.77	2.69316	12.4495	0
	High	YGGQPVPNFPSK	1	5	1	B7FAV1		0	0	0.0007417	3.03098	2	1290.65	3.96569	13.5459	0
	High	LIALLEVLSQK	1	9	3	B7FAV1;Q80X90;D3YW87		0	0	0.04594	2.83022	2	1226.78	4.06901	23.1072	0
	High	EATTEFSVDAR	1	5	1	B7FAV1		0	0	0.02951	2.50395	2	1225.57	0.735061	12.6709	0
	High	GAGTGGLGLAVEGPSEAK	1	5	1	B7FAV1		0	0	0.04556	1.92371	2	1570.81	1.90791	14.6531	0
B7ZNJ1	Fn1 protein OS=Mus musculus GN=Fn1 PE=2 SV=1 - [B7ZNJ1_MOUSE]	41.4513	7.72	14	10	10	10	2176	239.571	6.1001
	A2	Sequence	# PSMs	# Proteins	# Protein Groups	Protein Group Accessions	Modifications	ΔCn	q-Value	PEP	XCorr	Charge	MH+ [Da]	ΔM [ppm]	RT [min]	# Missed Cleavages
	High	TEIDKPSQmQVTDVQDNSISVR	1	10	1	B7ZNJ1	M9(Oxidation)	0	0	6.89129e-11	6.54938	3	2506.21	-0.538467	13.1482	0
	High	QDGHLWcSTTSNYEQDQK	1	9	1	B7ZNJ1	C7(Carbamidomethyl)	0	0	2.238e-06	5.47289	3	2196.93	2.36089	12.3224	0
	High	EYLGAIcScTcFGGQR	1	11	1	B7ZNJ1	C7(Carbamidomethyl); C9(Carbamidomethyl); C11(Carbamidomethyl)	0	0	1.345e-08	4.78466	2	1878.8	1.70908	16.2939	0
	High	FGFcPmAAHEEIcTTNEGVmYR	1	9	1	B7ZNJ1	C4(Carbamidomethyl); M6(Oxidation); C13(Carbamidomethyl); M20(Oxidation)	0	0	0.0006114	4.20161	3	2652.1	1.92097	15.9275	0
	High	DSmIWDcTcIGAGR	1	10	1	B7ZNJ1	M3(Oxidation); C7(Carbamidomethyl); C9(Carbamidomethyl)	0	0	0.0002054	4.14188	2	1657.68	3.60296	16.5075	0
	High	SYTITGLQPGTDYK	1	11	1	B7ZNJ1		0	0	0.0002558	4.02819	2	1543.77	3.20328	15.3858	0
	High	VVTPLSPPTNLHLEANPDTGVLTVSWER	1	10	1	B7ZNJ1		0	0	0.03099	3.78711	3	3042.59	1.19094	21.2224	0
	High	VTDATETTITISWR	1	11	1	B7ZNJ1		0	0	0.0002775	3.32972	2	1593.82	3.98013	17.6002	0
	High	LGVRPSQGGEAPR	1	10	1	B7ZNJ1		0	0	0.001791	3.1189	3	1323.71	-0.659182	10.6285	0
	High	IGDTWSK	1	9	1	B7ZNJ1		0	0	0.02566	2.03694	2	806.406	2.21128	11.2243	0
P26039	Talin-1 OS=Mus musculus GN=Tln1 PE=1 SV=2 - [TLN1_MOUSE]	39.3109	6.02	5	9	9	10	2541	269.653	6.17627
	A2	Sequence	# PSMs	# Proteins	# Protein Groups	Protein Group Accessions	Modifications	ΔCn	q-Value	PEP	XCorr	Charge	MH+ [Da]	ΔM [ppm]	RT [min]	# Missed Cleavages
	High	LNEAAAGLNQAATELVQASR	1	3	1	P26039		0	0	1.184e-10	4.84869	2	2027.06	3.41877	19.507	0
	High	LAQAAQSSVATITR	1	5	1	P26039		0	0	1.407e-08	4.8237	2	1416.78	3.00422	12.3937	0
	High	EADESLNFEEQILEAAK	1	4	1	P26039		0	0	8.461e-05	4.61392	2	1935.92	2.75852	21.2455	0
	High	TLAESALQLLYTAK	2	5	1	P26039		0	0	1.063e-05	4.43711	2	1521.86	4.09158	22.4164	0
	High	VGAIPANALDDGQWSQGLISAAR	1	5	1	P26039		0	0	0.01037	4.16182	3	2310.19	3.01175	20.6374	0
	High	TmLESAGGLIQTAR	1	5	1	P26039	M2(Oxidation)	0	0	0.001817	3.98378	2	1463.76	4.10729	14.7183	0
	High	GSQAQPDSPSAQLALIAASQSFLQPGGK	1	3	1	P26039		0	0	0.0006197	3.60444	3	2754.41	2.55759	22.6563	0
	High	VGDDPAVWQLK	1	5	1	P26039		0	0	0.0003573	3.03403	2	1227.64	1.89506	16.5105	0
	High	VLVQNAAGSQEK	1	5	1	P26039		0	0	0.0165	2.56108	2	1243.67	2.51886	10.6697	0
P07724	Serum albumin OS=Mus musculus GN=Alb PE=1 SV=3 - [ALBU_MOUSE]	30.2294	19.24	2	8	8	8	608	68.6477	6.07471
	A2	Sequence	# PSMs	# Proteins	# Protein Groups	Protein Group Accessions	Modifications	ΔCn	q-Value	PEP	XCorr	Charge	MH+ [Da]	ΔM [ppm]	RT [min]	# Missed Cleavages
	High	TVmDDFAQFLDTccK	1	1	1	P07724	M3(Oxidation); C13(Carbamidomethyl); C14(Carbamidomethyl)	0	0	0.002813	4.61542	2	1866.78	2.3676	20.2781	0
	High	AADKDTcFSTEGPNLVTR	1	1	1	P07724	C7(Carbamidomethyl)	0	0	0.003149	4.47757	3	1981.94	3.58525	13.4622	1
	High	LGEYGFQNAILVR	1	1	1	P07724		0	0	0.0003702	3.83841	2	1479.8	3.76516	18.8572	0
	High	LSQTFPNADFAEITK	1	1	1	P07724		0	0	2.554e-05	3.73412	2	1681.85	2.50225	18.1373	0
	High	GLVLIAFSQYLQK	1	2	1	P07724		0	0	0.001725	3.62125	2	1479.86	4.58544	23.0934	0
	High	RPcFSALTVDETYVPK	1	1	1	P07724	C3(Carbamidomethyl)	0	0	0.01413	3.39904	3	1882.94	3.61262	16.4238	0
	High	APQVSTPTLVEAAR	1	1	1	P07724		0	0	0.0003651	3.32718	2	1439.79	0.667586	14.5174	0
	High	DVFLGTFLYEYSR	1	1	1	P07724		0	0	0.0008832	3.21643	2	1609.8	4.77053	23.9846	0
Q9Z1R9	MCG124046 OS=Mus musculus GN=Prss1 PE=2 SV=1 - [Q9Z1R9_MOUSE]	24.3972	8.13	1	1	1	8	246	26.1178	4.94482
	A2	Sequence	# PSMs	# Proteins	# Protein Groups	Protein Group Accessions	Modifications	ΔCn	q-Value	PEP	XCorr	Charge	MH+ [Da]	ΔM [ppm]	RT [min]	# Missed Cleavages
	High	LGEHNInVLEGNEQFIDAAK	6	1	1	Q9Z1R9	N7(Deamidated)	0	0	3.85e-05	4.82145	3	2212.1	6.04779	17.9958	0
	High	LGEHNINVLEGNEQFIDAAK	2	1	1	Q9Z1R9		0	0	0.009172	4.40978	2	2211.11	3.27185	17.1668	0
P11499	Heat shock protein HSP 90-beta OS=Mus musculus GN=Hsp90ab1 PE=1 SV=3 - [HS90B_MOUSE]	20.4016	10.22	21	5	5	5	724	83.2291	5.03369
	A2	Sequence	# PSMs	# Proteins	# Protein Groups	Protein Group Accessions	Modifications	ΔCn	q-Value	PEP	XCorr	Charge	MH+ [Da]	ΔM [ppm]	RT [min]	# Missed Cleavages
	High	NPDDITQEEYGEFYK	1	2	1	P11499		0	0	9.115e-09	4.93253	2	1847.8	2.4299	16.4297	0
	High	YHTSQSGDEmTSLSEYVSR	1	4	1	P11499	M10(Oxidation)	0	0	7.047e-08	4.86915	3	2192.95	2.90934	13.1121	0
	High	HLEINPDHPIVETLR	1	3	1	P11499		0	0	0.0001437	4.25584	3	1782.95	2.75034	14.6591	0
	High	TLTLVDTGIGmTK	1	11	1	P11499	M11(Oxidation)	0	0	0.004131	3.44625	2	1365.73	2.73523	16.2245	0
	High	ELISNASDALDK	1	7	1	P11499		0	0	0.006801	2.89787	2	1275.65	2.48527	13.9534	0
D3YVS6	Protein G6b OS=Mus musculus GN=G6b PE=4 SV=1 - [D3YVS6_MOUSE]	18.7573	19.8	2	4	4	5	197	21.1853	10.0962
	A2	Sequence	# PSMs	# Proteins	# Protein Groups	Protein Group Accessions	Modifications	ΔCn	q-Value	PEP	XCorr	Charge	MH+ [Da]	ΔM [ppm]	RT [min]	# Missed Cleavages
	High	RLELLLSAGDSGTFFcK	2	2	1	D3YVS6	C16(Carbamidomethyl)	0	0	0.0442	4.3853	2	1913.98	2.54914	19.8154	1
	High	LELLLSAGDSGTFFcK	1	2	1	D3YVS6	C15(Carbamidomethyl)	0	0	2.524e-05	4.23928	2	1757.89	4.46814	21.6439	0
	High	VNLScIGVSDPTR	1	2	1	D3YVS6	C5(Carbamidomethyl)	0	0	0.03751	3.66627	2	1417.72	3.55953	15.2933	0
	High	RPILWASTR	1	2	1	D3YVS6		0	0	0.04032	3.20628	2	1099.64	-0.674007	12.6454	0
E9QAI5	CAD protein OS=Mus musculus GN=Cad PE=3 SV=1 - [E9QAI5_MOUSE]	17.5406	3.1	9	5	5	5	2162	236.099	6.49365
	A2	Sequence	# PSMs	# Proteins	# Protein Groups	Protein Group Accessions	Modifications	ΔCn	q-Value	PEP	XCorr	Charge	MH+ [Da]	ΔM [ppm]	RT [min]	# Missed Cleavages
	High	QIALAVLSTELAVR	1	6	1	E9QAI5		0	0	0.00125	3.77416	2	1483.89	3.204	21.6469	0
	High	VNEISVEVDSDPR	1	6	1	E9QAI5		0	0	2.483e-05	3.69097	2	1458.71	2.96294	13.6247	0
	High	TLGVDLVALATR	1	4	1	E9QAI5		0	0	0.0004547	3.68779	2	1228.73	3.25276	20.6717	0
	High	LLDTIGISQPQWR	1	4	1	E9QAI5		0	0	0.0001711	3.57456	2	1526.84	3.24246	18.6835	0
	High	VLGTSPEAIDSAENR	1	4	1	E9QAI5		0	0	0.0001188	2.81312	2	1558.77	2.02215	13.1817	0
Q61781	Keratin, type I cytoskeletal 14 OS=Mus musculus GN=Krt14 PE=1 SV=2 - [K1C14_MOUSE]	17.1089	11.16	17	2	5	5	484	52.8339	5.17334
	A2	Sequence	# PSMs	# Proteins	# Protein Groups	Protein Group Accessions	Modifications	ΔCn	q-Value	PEP	XCorr	Charge	MH+ [Da]	ΔM [ppm]	RT [min]	# Missed Cleavages
	High	GQVGGDVNVEmDAAPGVDLSR	1	3	1	Q61781	M11(Oxidation)	0	0	4.502e-08	4.71492	2	2101.99	3.47248	15.2153	0
	High	EVATNSELVQSGK	1	2	1	Q61781		0	0	0.002309	3.78773	2	1361.69	2.30151	11.1219	0
	High	TRLEQEIATYR	1	13	2	Q61781;Q61782		0	0	0.01623	3.22339	2	1379.73	2.6756	13.2202	1
	High	LEQEIATYR	1	15	2	Q61781;Q61782		0	0	0.02176	2.80219	2	1122.58	1.65409	12.1618	0
	High	VTMQNLNDR	1	12	2	A2A513;Q61781		0	0	0.04593	2.58064	2	1090.53	1.03692	11.2037	0
Q3TB22	Putative uncharacterized protein (Fragment) OS=Mus musculus GN=Fasn PE=2 SV=1 - [Q3TB22_MOUSE]	16.4685	1.65	3	3	3	5	2179	236.736	6.60986
	A2	Sequence	# PSMs	# Proteins	# Protein Groups	Protein Group Accessions	Modifications	ΔCn	q-Value	PEP	XCorr	Charge	MH+ [Da]	ΔM [ppm]	RT [min]	# Missed Cleavages
	High	VGDPQELnGITR	1	3	1	Q3TB22	N8(Deamidated)	0	0	0.003366	3.97165	2	1299.66	2.71687	12.5389	0
	High	GVDLVLNSLAEEK	1	3	1	Q3TB22		0	0	0.0004385	3.57948	2	1386.75	2.76118	18.6928	0
	High	VGDPQELNGITR	1	3	1	Q3TB22		0	0	4.591e-05	3.465	2	1298.67	2.2545	12.9817	0
	High	FDASFFGVHPK	2	3	1	Q3TB22		0	0	0.02725	2.78328	2	1251.62	3.04656	16.8104	0
Q7TMY8	E3 ubiquitin-protein ligase HUWE1 OS=Mus musculus GN=Huwe1 PE=1 SV=5 - [HUWE1_MOUSE]	15.7306	1.44	5	5	5	5	4377	482.332	5.22412
	A2	Sequence	# PSMs	# Proteins	# Protein Groups	Protein Group Accessions	Modifications	ΔCn	q-Value	PEP	XCorr	Charge	MH+ [Da]	ΔM [ppm]	RT [min]	# Missed Cleavages
	High	LGSSGLGSASSIQAAVR	1	3	1	Q7TMY8		0	0	3.309e-08	4.23114	2	1560.84	3.71598	14.9438	0
	High	LLSLISIALPENK	1	3	1	Q7TMY8		0	0	0.0155	3.42889	2	1410.86	3.30608	22.2526	0
	High	GSGTASDDEFENLR	1	3	1	Q7TMY8		0	0	0.04214	2.85017	2	1497.65	2.9543	13.6522	0
	High	ALAELFGLLVK	1	5	1	Q7TMY8		0	0	0.0002431	2.77389	2	1173.73	4.20223	24.2304	0
	High	TNIFQIQR	1	3	1	Q7TMY8		0	0	0.005788	2.44649	2	1019.57	3.40117	15.3578	0
Q9JHU4	Cytoplasmic dynein 1 heavy chain 1 OS=Mus musculus GN=Dync1h1 PE=1 SV=2 - [DYHC1_MOUSE]	15.7223	1.36	5	5	5	5	4644	531.71	6.41748
	A2	Sequence	# PSMs	# Proteins	# Protein Groups	Protein Group Accessions	Modifications	ΔCn	q-Value	PEP	XCorr	Charge	MH+ [Da]	ΔM [ppm]	RT [min]	# Missed Cleavages
	High	EALELTDTGLLSGSEER	1	2	1	Q9JHU4		0	0	2.062e-05	3.96176	2	1819.9	3.18889	18.5535	0
	High	VLLTTQGVDmISK	1	3	1	Q9JHU4	M10(Oxidation)	0	0	1.837e-05	3.66808	2	1420.78	3.25626	15.0745	0
	High	VTFVNFTVTR	1	3	1	Q9JHU4		0	0	0.0009023	3.03007	2	1183.65	4.11588	17.8827	0
	High	LLAESVTEVEIFGK	1	1	1	Q9JHU4		0	0	0.01953	2.72226	2	1534.84	2.92318	20.1326	0
	High	EYQTQLIQR	1	1	1	Q9JHU4		0	0.006	0.05171	2.34009	2	1178.62	1.81278	12.3966	0
Q922U2	Keratin, type II cytoskeletal 5 OS=Mus musculus GN=Krt5 PE=1 SV=1 - [K2C5_MOUSE]	14.5194	5.86	8	2	3	4	580	61.7286	7.75244
	A2	Sequence	# PSMs	# Proteins	# Protein Groups	Protein Group Accessions	Modifications	ΔCn	q-Value	PEP	XCorr	Charge	MH+ [Da]	ΔM [ppm]	RT [min]	# Missed Cleavages
	High	SLDLDSIIAEVK	2	9	2	Q922U2;P50446		0	0	2.58e-06	4.28569	2	1302.71	-1.07359	22.1177	0
	High	YEELQQTAGR	1	1	1	Q922U2		0	0	0.005153	3.26638	2	1194.58	0.321187	10.9203	0
	High	VDALmDEINFmK	1	1	1	Q922U2	M5(Oxidation); M11(Oxidation)	0	0	0.0004571	3.13647	2	1457.67	0.611885	16.3987	0
P50446	Keratin, type II cytoskeletal 6A OS=Mus musculus GN=Krt6a PE=2 SV=3 - [K2C6A_MOUSE]	12.8216	7.05	8	1	2	3	553	59.2986	7.94287
	A2	Sequence	# PSMs	# Proteins	# Protein Groups	Protein Group Accessions	Modifications	ΔCn	q-Value	PEP	XCorr	Charge	MH+ [Da]	ΔM [ppm]	RT [min]	# Missed Cleavages
	High	ALYEAELSqMqTHISDTSVVLSmDNNR	1	1	1	P50446	Q9(Deamidated); Q11(Deamidated); M23(Oxidation)	0	0	0.002013	4.70507	3	3070.42	7.77479	16.7213	0
	High	SLDLDSIIAEVK	2	9	2	Q922U2;P50446		0	0	2.58e-06	4.28569	2	1302.71	-1.07359	22.1177	0
P04104	Keratin, type II cytoskeletal 1 OS=Mus musculus GN=Krt1 PE=1 SV=4 - [K2C1_MOUSE]	12.8076	3.77	5	2	2	5	637	65.5653	8.14795
	A2	Sequence	# PSMs	# Proteins	# Protein Groups	Protein Group Accessions	Modifications	ΔCn	q-Value	PEP	XCorr	Charge	MH+ [Da]	ΔM [ppm]	RT [min]	# Missed Cleavages
	High	FLEQQNQVLQTK	1	6	1	P04104		0	0	0.0007461	4.769	2	1475.79	2.81545	13.4293	0
	High	FLEQQnQVLQTK	3	6	1	P04104	N6(Deamidated)	0	0	2.535e-06	4.43813	2	1476.78	7.76826	13.7302	0
	High	TNAENEFVTIKK	1	1	1	P04104		0	0	0.00874	3.60043	2	1393.74	2.53568	11.8671	1
P68373	Tubulin alpha-1C chain OS=Mus musculus GN=Tuba1c PE=1 SV=1 - [TBA1C_MOUSE]	12.5657	11.8	10	3	3	3	449	49.8775	5.09717
	A2	Sequence	# PSMs	# Proteins	# Protein Groups	Protein Group Accessions	Modifications	ΔCn	q-Value	PEP	XCorr	Charge	MH+ [Da]	ΔM [ppm]	RT [min]	# Missed Cleavages
	High	AVFVDLEPTVIDEVR	1	5	1	P68373		0	0	1.468e-06	4.46135	2	1701.91	3.90848	21.017	0
	High	TIGGGDDSFNTFFSETGAGK	1	6	1	P68373		0	0	4.85e-07	4.09719	2	2007.9	2.72218	19.545	0
	High	VGINYQPPTVVPGGDLAK	1	9	1	P68373		0	0	7.758e-05	4.00721	2	1824.99	3.01541	17.4457	0
Q99LT6	Eef2 protein (Fragment) OS=Mus musculus GN=Eef2 PE=2 SV=1 - [Q99LT6_MOUSE]	12.2848	17.42	18	3	3	3	287	32.0363	6.78564
	A2	Sequence	# PSMs	# Proteins	# Protein Groups	Protein Group Accessions	Modifications	ΔCn	q-Value	PEP	XCorr	Charge	MH+ [Da]	ΔM [ppm]	RT [min]	# Missed Cleavages
	High	ARPFPDGLAEDIDKGEVSAR	1	18	1	Q99LT6		0	0	0.008203	4.97858	3	2143.08	1.94819	15.6808	1
	High	ETVSEESNVLcLSK	1	16	1	Q99LT6	C11(Carbamidomethyl)	0	0	1.188e-05	4.08025	2	1594.77	2.24597	15.1821	0
	High	AYLPVNESFGFTADLR	1	18	1	Q99LT6		0	0	0.0204	3.22597	2	1799.9	3.22012	20.9381	0
Q61782	Type I epidermal keratin mRNA, 3'end (Fragment) OS=Mus musculus PE=2 SV=1 - [Q61782_MOUSE]	12.1419	35.48	5	1	3	3	93	10.6554	6.30322
	A2	Sequence	# PSMs	# Proteins	# Protein Groups	Protein Group Accessions	Modifications	ΔCn	q-Value	PEP	XCorr	Charge	MH+ [Da]	ΔM [ppm]	RT [min]	# Missed Cleavages
	High	LLEGEDAHLSSSQFSSGSQSSR	1	1	1	Q61782		0	0	1.256e-09	6.11627	3	2309.07	3.88984	13.262	0
	High	TRLEQEIATYR	1	13	2	Q61781;Q61782		0	0	0.01623	3.22339	2	1379.73	2.6756	13.2202	1
	High	LEQEIATYR	1	15	2	Q61781;Q61782		0	0	0.02176	2.80219	2	1122.58	1.65409	12.1618	0
E9Q1Z0	Protein 4732456N10Rik OS=Mus musculus GN=4732456N10Rik PE=3 SV=1 - [E9Q1Z0_MOUSE]	11.6835	4.28	6	1	2	3	538	58.1882	8.25049
	A2	Sequence	# PSMs	# Proteins	# Protein Groups	Protein Group Accessions	Modifications	ΔCn	q-Value	PEP	XCorr	Charge	MH+ [Da]	ΔM [ppm]	RT [min]	# Missed Cleavages
	High	SLnLDSIIAEVK	2	3	1	E9Q1Z0	N3(Deamidated)	0	0	2.571e-06	4.28569	2	1302.71	-1.07052	22.1177	0
	High	LALDIEIATYR	1	7	1	E9Q1Z0		0	0	0.01138	3.56703	2	1277.71	3.8037	19.7219	0
Q9CPN9	Protein 2210010C04Rik OS=Mus musculus GN=2210010C04Rik PE=2 SV=1 - [Q9CPN9_MOUSE]	10.6793	4.86	2	1	1	4	247	26.405	7.92822
	A2	Sequence	# PSMs	# Proteins	# Protein Groups	Protein Group Accessions	Modifications	ΔCn	q-Value	PEP	XCorr	Charge	MH+ [Da]	ΔM [ppm]	RT [min]	# Missed Cleavages
	High	YVNWIQQTIAAN	2	2	1	Q9CPN9		0	0	0.008839	3.97407	2	1420.72	-1.8113	21.4366	0
	High	YVNWIqQTIAAN	2	2	1	Q9CPN9	Q6(Deamidated)	0	0	0.0003944	3.49228	2	1421.71	3.33658	22.219	0
Q80X90	Filamin-B OS=Mus musculus GN=Flnb PE=1 SV=3 - [FLNB_MOUSE]	8.6913	1.27	1	2	3	3	2602	277.651	5.70654
	A2	Sequence	# PSMs	# Proteins	# Protein Groups	Protein Group Accessions	Modifications	ΔCn	q-Value	PEP	XCorr	Charge	MH+ [Da]	ΔM [ppm]	RT [min]	# Missed Cleavages
	High	VLFASQEIPASPFR	1	1	1	Q80X90		0	0	0.04281	3.25591	2	1561.84	3.24842	19.5482	0
	High	LIALLEVLSQK	1	9	3	B7FAV1;Q80X90;D3YW87		0	0	0.04594	2.83022	2	1226.78	4.06901	23.1072	0
	High	YADEEIPR	1	1	1	Q80X90		0	0	0.00409	2.60518	2	992.469	0.962866	11.4254	0
A2A513	Keratin, type I cytoskeletal 10 OS=Mus musculus GN=Krt10 PE=3 SV=1 - [A2A513_MOUSE]	8.42487	5.35	5	2	3	3	561	57.0067	5.07178
	A2	Sequence	# PSMs	# Proteins	# Protein Groups	Protein Group Accessions	Modifications	ΔCn	q-Value	PEP	XCorr	Charge	MH+ [Da]	ΔM [ppm]	RT [min]	# Missed Cleavages
	High	ALEESNYELEGK	1	2	1	A2A513		0	0	0.0005119	3.20211	2	1381.65	1.6929	12.5699	0
	High	LENEIQTYR	1	2	1	A2A513		0	0	0.03017	2.64213	2	1165.59	1.9496	11.8864	0
	High	VTMQNLNDR	1	12	2	A2A513;Q61781		0	0	0.04593	2.58064	2	1090.53	1.03692	11.2037	0
E9Q5F4	Actin, cytoplasmic 1 (Fragment) OS=Mus musculus GN=Actb PE=3 SV=1 - [E9Q5F4_MOUSE]	7.79482	12.83	39	2	2	2	265	29.4236	5.10986
	A2	Sequence	# PSMs	# Proteins	# Protein Groups	Protein Group Accessions	Modifications	ΔCn	q-Value	PEP	XCorr	Charge	MH+ [Da]	ΔM [ppm]	RT [min]	# Missed Cleavages
	High	SYELPDGQVITIGNER	1	35	1	E9Q5F4		0	0	9.819e-06	4.04313	2	1790.9	3.83048	18.7431	0
	High	VAPEEHPVLLTEAPLNPK	1	21	1	E9Q5F4		0	0	0.00168	3.75169	3	1954.07	4.52187	15.7229	0
B2RTP7	Krt2 protein OS=Mus musculus GN=Krt2 PE=2 SV=1 - [B2RTP7_MOUSE]	7.61607	3.68	3	2	2	2	707	70.8798	8.06006
	A2	Sequence	# PSMs	# Proteins	# Protein Groups	Protein Group Accessions	Modifications	ΔCn	q-Value	PEP	XCorr	Charge	MH+ [Da]	ΔM [ppm]	RT [min]	# Missed Cleavages
	High	GFSSGSAVVSGGSR	1	2	1	B2RTP7		0	0	1.092e-06	4.64042	2	1254.61	2.21879	11.2119	0
	High	LLRDYQELmNTK	1	3	1	B2RTP7	M9(Oxidation)	0	0	0.005644	2.97566	2	1539.79	2.69584	12.3532	1
A1L0X5	Krt78 protein (Fragment) OS=Mus musculus GN=Krt78 PE=2 SV=1 - [A1L0X5_MOUSE]	7.18294	2.85	5	2	2	2	492	54.7393	6.30322
	A2	Sequence	# PSMs	# Proteins	# Protein Groups	Protein Group Accessions	Modifications	ΔCn	q-Value	PEP	XCorr	Charge	MH+ [Da]	ΔM [ppm]	RT [min]	# Missed Cleavages
	High	SLNNQFASFIDKVR	1	5	1	A1L0X5		0	0	0.002838	4.23332	2	1638.87	4.32595	18.7687	1
	High	SLNNQFASFIDK	1	5	1	A1L0X5		0	0.006	0.05102	2.94962	2	1383.69	2.73044	18.2254	0
Q80U79	MKIAA0097 protein (Fragment) OS=Mus musculus GN=Ckap5 PE=2 SV=1 - [Q80U79_MOUSE]	7.12382	1.52	4	2	2	2	1711	189.371	8.26514
	A2	Sequence	# PSMs	# Proteins	# Protein Groups	Protein Group Accessions	Modifications	ΔCn	q-Value	PEP	XCorr	Charge	MH+ [Da]	ΔM [ppm]	RT [min]	# Missed Cleavages
	High	FIQPNIGELPTALK	1	4	1	Q80U79		0	0	0.04507	3.90326	2	1540.88	3.1087	19.5203	0
	High	DAAFEALGTALK	1	4	1	Q80U79		0	0	0.007922	3.22056	2	1206.64	3.41551	18.6582	0
Q8VED5	Keratin, type II cytoskeletal 79 OS=Mus musculus GN=Krt79 PE=2 SV=2 - [K2C79_MOUSE]	6.96527	2.26	1	1	1	2	531	57.5168	7.69385
	A2	Sequence	# PSMs	# Proteins	# Protein Groups	Protein Group Accessions	Modifications	ΔCn	q-Value	PEP	XCorr	Charge	MH+ [Da]	ΔM [ppm]	RT [min]	# Missed Cleavages
	High	NLDLDSIIAEVK	1	1	1	Q8VED5		0	0	1.33e-06	4.50578	2	1329.72	-1.26227	22.1206	0
	High	nLDLDSIIAEVK	1	1	1	Q8VED5	N1(Deamidated)	0	0	0.003721	2.45949	2	1330.71	2.7695	23.8512	0
A1E2B8	Inducible heat shock protein 70 OS=Mus musculus PE=3 SV=1 - [A1E2B8_MOUSE]	6.7378	4.37	7	2	2	2	641	70.088	5.71924
	A2	Sequence	# PSMs	# Proteins	# Protein Groups	Protein Group Accessions	Modifications	ΔCn	q-Value	PEP	XCorr	Charge	MH+ [Da]	ΔM [ppm]	RT [min]	# Missed Cleavages
	High	IINEPTAAAIAYGLDR	1	4	1	A1E2B8		0	0	8.977e-07	3.84525	2	1687.91	3.81728	18.7775	0
	High	DAGVIAGLNVLR	1	7	1	A1E2B8		0	0	0.02935	2.89255	2	1197.7	3.91027	19.4917	0
D3YW87	Filamin-C OS=Mus musculus GN=Flnc PE=1 SV=1 - [D3YW87_MOUSE]	5.99758	0.96	3	1	2	2	2704	288.411	5.99854
	A2	Sequence	# PSMs	# Proteins	# Protein Groups	Protein Group Accessions	Modifications	ΔCn	q-Value	PEP	XCorr	Charge	MH+ [Da]	ΔM [ppm]	RT [min]	# Missed Cleavages
	High	SPFVVNVAPPLDLSK	1	3	1	D3YW87		0	0	0.01396	3.16736	2	1582.89	3.59768	20.4216	0
	High	LIALLEVLSQK	1	9	3	B7FAV1;Q80X90;D3YW87		0	0	0.04594	2.83022	2	1226.78	4.06901	23.1072	0
Q792Z1	MCG140784 OS=Mus musculus GN=Try10 PE=2 SV=1 - [Q792Z1_MOUSE]	4.22957	10.57	1	1	1	2	246	26.2039	5.8335
	A2	Sequence	# PSMs	# Proteins	# Protein Groups	Protein Group Accessions	Modifications	ΔCn	q-Value	PEP	XCorr	Charge	MH+ [Da]	ΔM [ppm]	RT [min]	# Missed Cleavages
	High	LGEHNInVLEGNEQFIDAANIIKHPK	2	1	1	Q792Z1	N7(Deamidated)	0	0	0.00755	4.22957	4	2914.52	4.14742	19.8408	1
Q8BIE2	Putative uncharacterized protein OS=Mus musculus GN=Myh9 PE=2 SV=1 - [Q8BIE2_MOUSE]	4.17201	5.82	8	1	1	1	275	30.9047	7.40088
	A2	Sequence	# PSMs	# Proteins	# Protein Groups	Protein Group Accessions	Modifications	ΔCn	q-Value	PEP	XCorr	Charge	MH+ [Da]	ΔM [ppm]	RT [min]	# Missed Cleavages
	High	QLLQANPILEAFGNAK	1	8	1	Q8BIE2		0	0	5.934e-06	4.17201	2	1726.96	3.7734	22.0152	0
Q3UNG0	Putative uncharacterized protein OS=Mus musculus GN=Lamc1 PE=2 SV=1 - [Q3UNG0_MOUSE]	4.14898	1.77	3	1	1	1	790	86.661	5.46533
	A2	Sequence	# PSMs	# Proteins	# Protein Groups	Protein Group Accessions	Modifications	ΔCn	q-Value	PEP	XCorr	Charge	MH+ [Da]	ΔM [ppm]	RT [min]	# Missed Cleavages
	High	LSAEDLVLEGAGLR	1	3	1	Q3UNG0		0	0	0.001826	4.14898	2	1442.79	1.81867	20.6991	0
Q91ZX7	Prolow-density lipoprotein receptor-related protein 1 OS=Mus musculus GN=Lrp1 PE=1 SV=1 - [LRP1_MOUSE]	4.01043	0.31	1	1	1	1	4545	504.411	5.36377
	A2	Sequence	# PSMs	# Proteins	# Protein Groups	Protein Group Accessions	Modifications	ΔCn	q-Value	PEP	XCorr	Charge	MH+ [Da]	ΔM [ppm]	RT [min]	# Missed Cleavages
	High	AALSGANVLTLIEK	1	1	1	Q91ZX7		0	0	2.041e-05	4.01043	2	1399.82	2.89064	20.5693	0
Q3TFE8	Putative uncharacterized protein OS=Mus musculus GN=Kpnb1 PE=2 SV=1 - [Q3TFE8_MOUSE]	3.85812	1.71	4	1	1	1	875	97.051	4.77979
	A2	Sequence	# PSMs	# Proteins	# Protein Groups	Protein Group Accessions	Modifications	ΔCn	q-Value	PEP	XCorr	Charge	MH+ [Da]	ΔM [ppm]	RT [min]	# Missed Cleavages
	High	LAATNALLNSLEFTK	1	4	1	Q3TFE8		0	0	0.008505	3.85812	2	1605.89	5.07416	20.9352	0
Q3TNZ8	Putative uncharacterized protein (Fragment) OS=Mus musculus GN=Lamb1 PE=2 SV=1 - [Q3TNZ8_MOUSE]	3.80294	4.52	7	1	1	1	332	37.7461	5.64307
	A2	Sequence	# PSMs	# Proteins	# Protein Groups	Protein Group Accessions	Modifications	ΔCn	q-Value	PEP	XCorr	Charge	MH+ [Da]	ΔM [ppm]	RT [min]	# Missed Cleavages
	High	YSDIEPSTEGEVIFR	1	7	1	Q3TNZ8		0	0	0.0003576	3.80294	2	1741.83	1.50572	17.337	0
E9Q5F6	Polyubiquitin-C (Fragment) OS=Mus musculus GN=Ubc PE=4 SV=1 - [E9Q5F6_MOUSE]	3.51676	23.88	18	1	1	1	201	22.5782	7.40088
	A2	Sequence	# PSMs	# Proteins	# Protein Groups	Protein Group Accessions	Modifications	ΔCn	q-Value	PEP	XCorr	Charge	MH+ [Da]	ΔM [ppm]	RT [min]	# Missed Cleavages
	High	TITLEVEPSDTIENVK	1	18	1	E9Q5F6		0	0	0.008508	3.51676	2	1787.93	2.13579	17.3935	0
P17897	Lysozyme C-1 OS=Mus musculus GN=Lyz1 PE=1 SV=1 - [LYZ1_MOUSE]	3.41872	8.11	1	1	1	1	148	16.7834	9.40771
	A2	Sequence	# PSMs	# Proteins	# Protein Groups	Protein Group Accessions	Modifications	ΔCn	q-Value	PEP	XCorr	Charge	MH+ [Da]	ΔM [ppm]	RT [min]	# Missed Cleavages
	High	STDYGIFQINSR	1	1	1	P17897		0	0	0.0316	3.41872	2	1400.69	8.33514	17.528	0
Q02053	Ubiquitin-like modifier-activating enzyme 1 OS=Mus musculus GN=Uba1 PE=1 SV=1 - [UBA1_MOUSE]	3.39214	1.23	1	1	1	1	1058	117.734	5.65576
	A2	Sequence	# PSMs	# Proteins	# Protein Groups	Protein Group Accessions	Modifications	ΔCn	q-Value	PEP	XCorr	Charge	MH+ [Da]	ΔM [ppm]	RT [min]	# Missed Cleavages
	High	DNPGVVTcLDEAR	1	1	1	Q02053	C8(Carbamidomethyl)	0	0	0.00294	3.39214	2	1445.67	2.5315	14.529	0
Q8K0J1	Igf2r protein (Fragment) OS=Mus musculus GN=Igf2r PE=2 SV=1 - [Q8K0J1_MOUSE]	3.3673	1.37	5	1	1	1	876	97.1403	5.8208
	A2	Sequence	# PSMs	# Proteins	# Protein Groups	Protein Group Accessions	Modifications	ΔCn	q-Value	PEP	XCorr	Charge	MH+ [Da]	ΔM [ppm]	RT [min]	# Missed Cleavages
	High	VPVDGPPIDIGR	1	5	1	Q8K0J1		0	0	0.01018	3.3673	2	1234.68	2.99312	15.6977	0
Q61649	Alpha-globin mRNA. (Fragment) OS=Mus musculus PE=2 SV=1 - [Q61649_MOUSE]	3.20464	25.86	7	1	1	1	58	6.21203	7.51807
	A2	Sequence	# PSMs	# Proteins	# Protein Groups	Protein Group Accessions	Modifications	ΔCn	q-Value	PEP	XCorr	Charge	MH+ [Da]	ΔM [ppm]	RT [min]	# Missed Cleavages
	High	IGGHGAEYGAEALER	1	7	1	Q61649		0	0	0.0404	3.20464	3	1529.74	3.53586	11.766	0
B7ZWL1	CCR4-NOT transcription complex subunit 1 OS=Mus musculus GN=Cnot1 PE=2 SV=1 - [B7ZWL1_MOUSE]	3.17643	0.43	3	1	1	1	2326	260.791	7.02002
	A2	Sequence	# PSMs	# Proteins	# Protein Groups	Protein Group Accessions	Modifications	ΔCn	q-Value	PEP	XCorr	Charge	MH+ [Da]	ΔM [ppm]	RT [min]	# Missed Cleavages
	High	SLDLIESLLR	1	3	1	B7ZWL1		0	0	0.043	3.17643	2	1158.68	3.5629	23.501	0
Q3TAN1	Putative uncharacterized protein (Fragment) OS=Mus musculus GN=Cltc PE=2 SV=1 - [Q3TAN1_MOUSE]	3.11992	3.09	6	1	1	1	388	42.9659	6.99072
	A2	Sequence	# PSMs	# Proteins	# Protein Groups	Protein Group Accessions	Modifications	ΔCn	q-Value	PEP	XCorr	Charge	MH+ [Da]	ΔM [ppm]	RT [min]	# Missed Cleavages
	High	NNLAGAEELFAR	1	6	1	Q3TAN1		0	0	0.003434	3.11992	2	1304.66	2.6659	17.4148	0
Q6PB44	Tyrosine-protein phosphatase non-receptor type 23 OS=Mus musculus GN=Ptpn23 PE=1 SV=2 - [PTN23_MOUSE]	3.08126	1.6	1	1	1	1	1692	185.1	6.80029
	A2	Sequence	# PSMs	# Proteins	# Protein Groups	Protein Group Accessions	Modifications	ΔCn	q-Value	PEP	XCorr	Charge	MH+ [Da]	ΔM [ppm]	RT [min]	# Missed Cleavages
	High	qILTLNVNLMLGQAQEcLLEKSmLDNR	1	1	1	Q6PB44	Q1(Deamidated); C17(Carbamidomethyl); M23(Oxidation)	0	0	0.04343	3.08126	4	3161.62	4.86749	21.0406	1
E9PVS1	Inter-alpha-trypsin inhibitor heavy chain H3 OS=Mus musculus GN=Itih3 PE=4 SV=1 - [E9PVS1_MOUSE]	2.97522	1.72	2	1	1	1	699	77.9681	6.84424
	A2	Sequence	# PSMs	# Proteins	# Protein Groups	Protein Group Accessions	Modifications	ΔCn	q-Value	PEP	XCorr	Charge	MH+ [Da]	ΔM [ppm]	RT [min]	# Missed Cleavages
	High	FTVSVNVAAGSK	1	2	1	E9PVS1		0	0	0.0006306	2.97522	2	1179.64	3.42938	14.4115	0
Q8BYH6	Putative uncharacterized protein OS=Mus musculus GN=Snrnp200 PE=2 SV=1 - [Q8BYH6_MOUSE]	2.84835	1.3	2	1	1	1	690	78.9808	5.10986
	A2	Sequence	# PSMs	# Proteins	# Protein Groups	Protein Group Accessions	Modifications	ΔCn	q-Value	PEP	XCorr	Charge	MH+ [Da]	ΔM [ppm]	RT [min]	# Missed Cleavages
	High	DIDAFWLQR	1	2	1	Q8BYH6		0	0	0.04537	2.84835	2	1163.59	2.58566	20.8764	0
P10126	Elongation factor 1-alpha 1 OS=Mus musculus GN=Eef1a1 PE=1 SV=3 - [EF1A1_MOUSE]	2.84501	2.38	5	1	1	1	462	50.0821	9.01221
	A2	Sequence	# PSMs	# Proteins	# Protein Groups	Protein Group Accessions	Modifications	ΔCn	q-Value	PEP	XCorr	Charge	MH+ [Da]	ΔM [ppm]	RT [min]	# Missed Cleavages
	High	IGGIGTVPVGR	1	5	1	P10126		0	0	0.0005895	2.84501	2	1025.61	3.10021	13.8597	0
V9GZK9	Sex-limited protein (Fragment) OS=Mus musculus GN=Slp PE=4 SV=1 - [V9GZK9_MOUSE]	2.80176	1.65	8	1	1	1	727	81.1661	7.47412
	A2	Sequence	# PSMs	# Proteins	# Protein Groups	Protein Group Accessions	Modifications	ΔCn	q-Value	PEP	XCorr	Charge	MH+ [Da]	ΔM [ppm]	RT [min]	# Missed Cleavages
	High	DSSTWLTAFVLK	1	8	1	V9GZK9		0	0	0.04517	2.80176	2	1367.72	1.35876	24.0193	0
Q61650	Beta-globin (Fragment) OS=Mus musculus PE=2 SV=1 - [Q61650_MOUSE]	2.57894	19.23	32	1	1	1	52	5.68679	4.80518
	A2	Sequence	# PSMs	# Proteins	# Protein Groups	Protein Group Accessions	Modifications	ΔCn	q-Value	PEP	XCorr	Charge	MH+ [Da]	ΔM [ppm]	RT [min]	# Missed Cleavages
	High	LLVVYPWTQR	1	32	1	Q61650		0	0	0.04594	2.57894	2	1274.73	2.79454	19.6544	0
P97313	DNA-dependent protein kinase catalytic subunit OS=Mus musculus GN=Prkdc PE=1 SV=3 - [PRKDC_MOUSE]	2.2276	0.19	1	1	1	1	4128	471.168	7.12256
	A2	Sequence	# PSMs	# Proteins	# Protein Groups	Protein Group Accessions	Modifications	ΔCn	q-Value	PEP	XCorr	Charge	MH+ [Da]	ΔM [ppm]	RT [min]	# Missed Cleavages
	High	LLEEALLR	1	1	1	P97313		0	0	0.01133	2.2276	2	956.58	2.4256	16.7444	0
Q5SWU9	Acetyl-CoA carboxylase 1 OS=Mus musculus GN=Acaca PE=1 SV=1 - [ACACA_MOUSE]	2.13479	0.6	1	1	1	1	2345	265.088	6.39209
	A2	Sequence	# PSMs	# Proteins	# Protein Groups	Protein Group Accessions	Modifications	ΔCn	q-Value	PEP	XCorr	Charge	MH+ [Da]	ΔM [ppm]	RT [min]	# Missed Cleavages
	High	LGGIPVGVVAVETR	1	1	1	Q5SWU9		0	0	0.008696	2.13479	2	1366.81	2.13186	17.9242	0
